# Supplementary material for: Spatial synaptic connectivity underlies oligodendroglioma evolution and recurrence
Source: Research Square preprint supplement (doi:10.21203/rs.3.rs-6299872/v1), 2025-04-04
Supplement: Supplementary file 1 [file 9f28797c53eaeb6305304e87.xlsx]

## Sheet: Supplementary_Table_1
Supplementary Table 1. Oligodendroglioma and astrocytoma samples and targeted next-generation DNA sequencing.
	KM4242_01	KM4242_02	KM4242_03	KM4242_04	KM4242_05	KM4242_06	KM4242_07	KM4242_08	KM4243_01	KM4243_02	KM4243_03	KM4243_04	KM4243_05	KM4243_06	NA	KM4243_08	KM4418_01	KM4418_02	KM4418_03	KM4418_04	KM4418_05	KM4418_06	KM4418_07	KM4418_08	KM4419_01	KM4419_02	KM4419_03	KM4419_04	KM4419_05	KM4419_06	KM4419_07	KM4419_08	NA
Patient	P1	P1	P2	P2	P3	P3	P4	P4	P5	P5	P6	P6	P7	P7	P8	P8	P9	P9	P10	P10	P11	P11	P12	P12	P13	P13	P14	P14	P15	P15	P15	P16	P16	VO1	VO2	VO3	VO4	VO5	VA1	VA1	VA2	VA2	VA3	VA3	VA4	VA4
Case	C1	C2	C1	C2	C1	C2	C1	C2	C1	C2	C1	C2	C1	C2		C2	C1	C2	C1	C2	C1	C2	C1	C2	C1	C2	C1	C2	C1	C2	C3	C1		C1	C1	C1	C1	C1	C1	C2	C1	C2	C1	C2	C1	C2
Spatial	1	1	1	1	1	1	1	1	1	1	1	1	1	1	0	1	1	1	1	1	1	1	1	1	1	1	1	1	1	1	1	1	0	0	0	0	0	0	1	1	1	1	1	1	1	1
Sex	F	F	M	M	M	M	F	F	F	F	M	M	F	F	M	M	M	M	M	M	F	F	F	F	M	M	M	M	F	F	F	F	F	M	F	M	M	M	F	F	M	M	F	F	M	M
Laterality	L	L	L	L	R	R	L	L	L	L	R	R	R	R	L	L	L	L	L	L	R	R	L	L	L	L	L	L	L	L	L	R	R	R	R	L	L	L	L	L	R	R	L	L	L	L
EOR	NTR	STR	STR	STR	GTR	GTR	NTR	GTR	NTR	STR	NTR	GTR	NTR	STR	STR	NTR	STR	STR	GTR	STR	STR	GTR	NTR	GTR	GTR	STR	NTR	NTR	NTR	NTR	STR	GTR	GTR	GTR	NTR	STR	GTR	GTR	NTR	NTR	STR	NTR	STR	NTR	STR	GTR
Histology	3	2	2	2	2	3	3	2	2	2	3	2,3	2	3		3	2	2	2	3	2,3	3	3	3	2	2	2	3	2	2	3	2		2	2	2	2	2	2	2	3	3	2	3	2	4
WHO grade	3	3	2	2	2	3	3	3	2	2	3	3	2	3	3	3	2	2	2	3	3	3	3	3	2	2	2	3	2	2	3	2	3	2	2	2	2	2	2	2	3	4	2	3	2	4
Ki-67	0.08	0.06	0.03	0.04	0.01	0.2	0.07	0.03	0.03	0.03	0.5	n/a	0.06	0.06	0.2	0.2	0.03	0.02	0.03	0.074	n/a	0.12	0.1	0.1	0.04	0.08	0.145	0.1	0.087	n/a			0.2		<3%	0.05	0.03	0.07	0.04	0.03	0.05	0.08	0.02	0.07	0.06	0.4
Adjuvant treatment	TMZ	XRT	Everolimus	TMZ + XRT	none	vaccine, XRT, TMZ	none	none	None	TMZ + XRT	None	TMZ + XRT	none	TMZ+XRT	TMZ + XRT	TMZ + XRT, Avastin	LGG vaccine	ivosidenib	none	TMZ + XRT	TMZ + XRT	Lomustine, Proton beam RT, Avastin, TMZ	TMZ	None	none	none	None	TMZ + XRT	None	AG-120 (Technically was on it when getting surgery, so not adjuvant?)		None	TMZ + XRT				TMZ		none	Tibsovo	TMZ/XRT then PNOC017 (TMZ + BGB-290)	TMZ	none	RT/TMZ (no adjuvant TMZ)	none	RT/TMZ
Mortality		Alive		Alive		Alive		Alive		Alive		Alive		Alive		Alive		Alive		Alive		Alive		Alive		Alive		Alive			Deceased		Alive	Alive	Alive	Alive	Alive	Alive		Alive		Alive		Alive		Deceased
PFS (years)	6.1589		1.8411		3.41096		2.54795		3.1589		1.04932		3.31781		4.31233		1.72603		2.41644		7.5726		2.29863		4.11507		2.41096		0.673973	2		1.60548							4.1		3.9		1.9		1
OS (years)		8.59452		8.57808		6.74795		6.59178		6.09315		4.36712		6.50959		6.47671		4.82192		8.11233		9.73699		2.47671		7.89041		6.13973			2.7726		3.27671	11	7	6	6	8		5.2		5.4		5.7		2.2
IDH1 R132H	1	1	1	1	1	1	1	1			1	1	1	1	1	1	1	1	1	1	1	1	1	1	1	1			1	1	1	1	1	1		1	1	1	1	1	1	1	1	1	1	1
IDH2 R172K									1	1																	1	1
TERTp		1			1	1		1		1		1		1		1		1		1		1				1		1	1	1
CIC		1						1		1		1				1		1				1						1	1	1		1	1
NOTCH1												1
FUBP1								1				1														1
PIK3CA					1	1						1		1
PIK3R1								1														1
ARID1A																1										1																		1
CDKN2A/B hom del																1						1																				1
CDKN2C																																1
RB1																																														1
ATRX																																1	1							1		1		1	1	1
p53																																								1		1		1	1	1
UCSF500		1		-	1	1		1				1		1		1		1		1		1				1		1			-	1	1							1		1	-	1	1	1
FISH	1		1	-	1		1				1		1				1		1		1		1	1	1		1				-			1	-	1	1	1	1		1		-
TMB		50.2			-					5.5						8.9						4.1						8.9		1.5										5.5		3.4				3.4
MSI		1.16			-			1.23		2.35				3.49		2.41						1.18						3.53												0		1.19				0
1p	1	1	1	1	1	1	1	1	1	1	1	1	1	1	1	1	1	1	1	1	1	1	1	1	1	1	1	1	1	1	1	1	1	1		1	1	1
19q	1	1	1	1	1	1	1	1	1	1	1	1	1	1	1	1	1	1	1	1	1	1	1	1	1	1	1	1	1	1	1	1	1	1		1	1	1				+, -				-
9p		CN LOH				-				CN LOH												CN LOH				-				-										-		+		-	-
1q																																										-
2p
2q																																								.					-
3p																														-
3q																																										-
4p						-																										-	-
4q						-																																				-
5p						+																																				-				+
5q
6p																														-		-														+
6q																														-												-		-	-	-
7p																													+											+
7q																													+															+
8p																													+
8q																													+
9q						+																								+
10p
10q																																										-			-	-
11p										CN LOH																			+													-
11q						+								+						+									+
12p																																								-		+
12q						-																																		-				-
13q																																													+	-
14q														-												-				-														-
15q						-		-								-						-							-	-
16p
16q
17p																																												CN LOH	CN LOH
17q														+																		+	+									+, -
18p						-				-																																				+
18q						-				-										-																										+
19p																														+												+, -
20p
20q																														+										+
21q																														+		+	+
22q														+																+		CN LOH	CN LOH
Xp
Xq

## Sheet: Supplementary_Table_2
Supplementary Table 2. Distribution of spatial transcriptomes across oligodendroglioma samples.
	0	1	2	3	4	5	6	7	8	9	10	11	12	13	14
KM4242_01	979	418	52	18	96	67	48	23	0	0	0	0	0	0	0
KM4242_02	499	785	904	81	145	148	6	263	0	0	0	0	0	0	0
KM4242_03	330	690	1198	13	62	56	0	398	0	0	0	0	1	0	0
KM4242_04	454	1410	0	14	250	0	2	1	1	0	0	0	0	0	0
KM4242_05	261	1335	1	24	91	0	2	16	0	0	0	0	0	0	0
KM4242_06	240	8	360	40	51	438	172	11	0	0	0	0	0	0	0
KM4242_07	1122	360	949	15	185	58	5	123	1	0	0	0	0	0	0
KM4242_08	215	1124	610	63	226	89	22	375	5	0	0	0	0	0	0
KM4243_01	796	295	0	118	211	4	40	0	1	0	0	0	0	0	0
KM4243_02	310	108	165	162	164	20	8	15	0	0	1	0	1	0	0
KM4243_03	935	13	0	18	158	0	25	0	0	0	0	0	0	0	0
KM4243_04	158	247	132	84	43	10	71	8	1	0	0	14	0	0	0
KM4243_05	524	384	44	636	97	25	39	23	0	0	260	0	0	0	0
KM4243_06	1467	215	106	26	181	82	125	21	0	0	0	0	59	109	1
KM4243_08	97	96	220	161	84	432	9	14	1	0	0	1	0	0	0
KM4418_01	404	229	247	180	85	95	43	4	0	0	0	0	0	0	0
KM4418_02	1434	433	16	245	167	41	47	8	0	0	0	0	0	0	0
KM4418_03	263	29	401	66	25	177	19	7	0	0	0	0	0	0	0
KM4418_04	124	844	12	45	67	8	56	20	0	0	0	0	0	0	0
KM4418_05	2579	222	0	24	154	25	40	0	0	0	0	0	0	0	0
KM4418_06	278	638	488	39	153	149	146	44	1	0	0	2	0	0	0
KM4418_07	406	114	383	68	84	112	19	18	0	0	0	0	0	0	0
KM4418_08	822	0	0	734	36	8	23	0	0	0	0	0	0	0	0
KM4419_01	203	83	223	6	38	74	5	22	0	0	3	0	0	0	0
KM4419_02	246	104	53	666	138	127	212	11	1	0	7	0	51	0	43
KM4419_03	256	197	414	668	226	182	233	25	0	0	1	0	0	0	0
KM4419_04	912	120	247	79	129	231	38	4	0	0	0	0	0	0	0
KM4419_05	170	250	333	265	137	123	113	106	1	0	0	0	0	0	0
KM4419_06	254	94	0	313	134	10	89	2	0	0	0	0	0	0	0
KM4419_07	8	9	0	32	36	0	9	0	812	336	1	0	0	0	0
KM4419_08	836	518	1	119	199	8	31	2	1	0	0	242	0	0	0

## Sheet: Supplementary_Table_3
Supplementary Table 3. Oligodendroglioma spatial transcritome marker genes.
cluster	gene	avg_log2FC	p_val_adj
0	BCAN	0.776673	0
0	CACNG4	0.634349	0
0	PTPRZ1	0.597661	0
0	TNR	0.594948	0
0	LHFPL3	0.589225	0
0	PDGFRA	0.575295	0
0	POLR2F	0.571593	0
0	SMOC1	0.562331	0
0	ETV1	0.559415	0
0	DLL3	0.549664	0
0	FERMT1	0.525663	0
0	RAB31	0.521368	0
0	SOX8	0.520393	0
0	GALNT13	0.519761	0
0	TCF12	0.510471	0
0	HES6	0.509474	0
0	EPN2	0.502085	0
0	FXYD6	0.501258	0
0	LRRN1	0.500888	0
0	MARCKS	0.500453	0
0	FAM181B	0.497532	0
0	COL20A1	0.493278	0
0	NCAN	0.467	0
0	GPR17	0.464108	0
0	SEZ6L	0.462041	0
0	KLRC3	0.454092	0
0	EGFR	0.44828	0
0	PHYHIPL	0.4482	0
0	SEMA5A	0.442013	0
0	PCDHGC3	0.441343	0
0	TNK2	0.437283	0
0	SHD	0.437181	0
0	HEY1	0.431096	0
0	SAPCD2	0.428551	0
0	ASIC4	0.424358	0
0	SNX22	0.419195	0
0	DDR1	0.417587	0
0	PLPPR1	0.411015	0
0	LRATD2	0.407862	0
0	SHC3	0.405683	0
0	SOX6	0.404183	0
0	LPCAT1	0.400174	0
0	ASIC1	0.398289	0
0	ADGRG1	0.397831	0
0	PCDHGC4	0.396532	0
0	C1QL1	0.394504	0
0	FAM110B	0.393393	0
0	ANGPTL2	0.389285	0
0	EEF2	0.387084	0
0	HIST1H4A	0.387521	2.90674248084264e-287
1	GFAP	1.61402	0
1	SPP1	1.51805	0
1	MBP	1.30371	0
1	TF	1.25405	0
1	PLP1	1.2285	0
1	SPARC	1.20855	0
1	AQP4	1.14577	0
1	MOG	1.11277	0
1	AGT	1.05557	0
1	SELL	1.0502	0
1	AQP1	1.03616	0
1	MOBP	1.02747	0
1	CLU	1.025	0
1	FAM107A	1.02458	0
1	CD99	1.01567	0
1	CARNS1	0.953669	0
1	MAG	0.940264	0
1	FTL	0.934323	0
1	GJA1	0.91968	0
1	APLNR	0.918781	0
1	CNP	0.888769	0
1	PTGDS	0.870614	0
1	HSPA2	0.858523	0
1	CLDN11	0.857565	0
1	PLEKHB1	0.849011	0
1	CNTN2	0.845517	0
1	TMEM144	0.842176	0
1	CRYAB	0.836623	0
1	PPP1R14A	0.833092	0
1	SCD	0.819411	0
1	DBNDD2	0.808113	0
1	ABCA2	0.806173	0
1	MYRF	0.795698	0
1	PLAAT3	0.779321	0
1	DTNA	0.776988	0
1	DAAM2	0.776933	0
1	APOE	0.773939	0
1	ETNPPL	0.760869	0
1	HAPLN2	0.759547	0
1	GPRC5B	0.74681	0
1	SELENOP	0.746591	0
1	PADI2	0.741718	0
1	APOC1	0.740542	0
1	CDK18	0.73907	0
1	ENPP2	0.727088	0
1	FGF1	0.72666	0
1	GSN	0.722014	0
1	HSPB8	0.716792	0
1	NKX6-2	0.714157	0
1	CST3	0.703425	0
2	NRGN	2.78906	0
2	SNAP25	2.42985	0
2	VSNL1	2.37566	0
2	NEFL	2.36555	0
2	SLC17A7	2.11927	0
2	OLFM1	2.11646	0
2	CAMK2A	2.04798	0
2	ENC1	2.00342	0
2	NEFM	1.95167	0
2	KIF5A	1.90033	0
2	EEF1A2	1.87546	0
2	CHN1	1.85512	0
2	UCHL1	1.85316	0
2	SNCB	1.81289	0
2	DNM1	1.77409	0
2	CABP1	1.75706	0
2	NCDN	1.68105	0
2	ATP1B1	1.66078	0
2	CALM3	1.64396	0
2	TUBA4A	1.59249	0
2	YWHAH	1.5279	0
2	TUBB2A	1.50842	0
2	DMTN	1.50638	0
2	STMN2	1.49446	0
2	PACSIN1	1.46101	0
2	YWHAG	1.43629	0
2	GNG3	1.42689	0
2	PRKAR1B	1.40788	0
2	CCK	1.36516	0
2	RGS4	1.34963	0
2	IDS	1.33175	0
2	ATRNL1	1.31164	0
2	CAMK2N1	1.30032	0
2	NCS1	1.28411	0
2	GABRA1	1.26707	0
2	SNCA	1.25737	0
2	NSF	1.25489	0
2	ATP2B2	1.24902	0
2	SERPINI1	1.23764	0
2	CPLX2	1.23261	0
2	NAPB	1.21296	0
2	CTXN1	1.17606	0
2	CA11	1.17443	0
2	SNCG	1.16971	0
2	SULT4A1	1.15944	0
2	ATP1A3	1.14912	0
2	DIRAS2	1.13157	0
2	SYN1	1.13112	0
2	RAB3A	1.12868	0
2	ARHGDIG	1.11478	0
3	HBA2	4.00186	0
3	HBA1	2.80268	0
3	PPBP	1.10778	0
3	FOS	0.734772	0
3	EGR1	0.478752	0
3	BTG2	0.406824	1.54935597295529e-243
3	JUNB	0.328783	6.92952174797663e-200
3	FOSB	0.493627	5.01303417406059e-176
3	JUN	0.362666	4.67716757377395e-168
3	DUSP1	0.304548	4.93168417164663e-62
3	IER2	0.3039	1.30870250537408e-31
4	ACTA2	1.37938	0
4	CCN2	1.35761	0
4	CLDN5	1.34622	0
4	MYL9	1.29911	0
4	ITM2A	1.1824	0
4	CAVIN2	1.06544	0
4	COL1A2	1.05939	0
4	DCN	1.05056	0
4	A2M	1.02882	0
4	IGFBP7	1.02319	0
4	SLC2A1	1.00724	0
4	IFI27	0.996172	0
4	ABCG2	0.967053	0
4	EPAS1	0.931666	0
4	TAGLN	0.930091	0
4	MFSD2A	0.925099	0
4	COL4A1	0.889062	0
4	IFITM3	0.888497	0
4	IGFBP3	0.876834	0
4	VIM	0.86729	0
4	SLC38A5	0.865207	0
4	VWF	0.841931	0
4	RGS5	0.809672	0
4	NET1	0.797609	0
4	ATP10A	0.783372	0
4	MT1E	0.778938	0
4	COL3A1	0.772053	0
4	HLA-E	0.7588	0
4	TAGLN2	0.757034	0
4	NR4A1	0.733599	0
4	BGN	0.724731	0
4	ENG	0.717876	0
4	PTPRB	0.689087	0
4	MYH9	0.673986	0
4	IFITM2	0.650625	0
4	CAVIN1	0.646435	0
4	PODXL	0.639087	0
4	SLC7A5	0.631597	0
4	CLEC3B	0.623745	0
4	GGT5	0.623467	0
4	SLC9A3R2	0.62257	0
4	HSPG2	0.617137	0
4	MT2A	0.614118	0
4	B2M	0.61281	0
4	CALD1	0.645033	3.40920265790814e-286
4	MCAM	0.654554	1.17016245346733e-284
4	ZFP36	0.617611	3.37040009127111e-259
4	TPM2	0.738363	2.08667583039468e-248
4	FOS	0.724214	5.69026393857595e-163
4	FOSB	0.639336	1.09054461110289e-161
5	HIST1H1B	0.710769	1.18429001769885e-213
5	GSX1	0.388128	1.20524126147995e-205
5	DGKB	0.539955	1.29481187859308e-181
5	HIST1H4A	0.543252	9.38579749681116e-174
5	PTMS	0.462365	5.83721369033297e-173
5	KIF5A	0.403573	3.31559973927239e-171
5	TOX3	0.723769	1.4148203920125e-166
5	SCN3A	0.652026	3.91530383407857e-166
5	MLLT11	0.390072	4.2504476518623e-147
5	JPT1	0.488183	4.86729458362986e-147
5	GRIA4	0.417484	7.78567187007091e-144
5	HIST1H2BO	0.59613	5.45708854947173e-140
5	NKD1	0.661225	2.23850620140588e-137
5	MAP2	0.396089	5.21643035978137e-137
5	TCF12	0.535449	2.8354788219947e-135
5	SOX4	0.497613	7.89217715890346e-135
5	FAM110B	0.403623	1.16159184199598e-133
5	RAP2A	0.426679	1.35363947795364e-130
5	GRIA2	0.411423	9.36275920433509e-128
5	HIST1H2AE	0.502327	5.03899841438591e-126
5	FAM181B	0.380143	2.47853597626073e-117
5	ID1	0.386941	7.30631415960686e-117
5	NOVA1	0.441487	1.15603800885709e-113
5	HIST1H4C	0.358178	1.17537565280923e-113
5	EEF1G	0.701929	1.28422168548288e-112
5	KLRC3	0.374347	2.86025652963778e-111
5	SOX6	0.35736	4.14789404945684e-110
5	HIST1H2BD	0.434707	7.39588879543312e-108
5	CD24	0.356999	6.28981505175985e-107
5	ODC1	0.376688	7.42050889133023e-103
5	HIST1H2BN	0.51117	2.45490030587436e-102
5	HIST1H2BG	0.458923	2.04271660838323e-100
5	HIST1H2BB	0.381538	7.50362528133697e-99
5	ELMO1	0.389165	2.53630381513182e-98
5	ID2	0.515124	4.18505956566877e-97
5	PCDH11X	0.404073	1.57598144702157e-93
5	VIPR2	0.363718	2.90729550844372e-88
5	HIST1H3H	0.405455	2.28129416748669e-85
5	NETO1	0.450708	2.04348723756153e-83
5	HIST1H3D	0.464335	2.22013233799348e-83
5	HIST2H2AB	0.359239	8.1162918778419e-78
5	PELI1	0.464413	2.60710201754327e-77
5	HIST1H2AD	0.366533	7.67139401006692e-58
5	IGSF9B	0.526077	9.21062695331759e-58
5	PTCH1	0.398713	1.84510947630983e-54
5	SOX11	0.385582	2.31389252909107e-43
5	PHLDA1	0.512496	3.70316130889207e-36
5	DLL1	0.386025	9.55056104626968e-20
5	VEGFA	0.627583	3.41766222057066e-18
5	DLL3	0.600387	9.84068506363185e-18
6	EGR1	2.00648	0
6	FOS	1.8493	0
6	FOSB	1.41669	0
6	BTG2	1.25886	0
6	JUNB	1.242	0
6	IER2	1.0582	0
6	JUN	0.923755	0
6	EGR2	0.457116	2.85515538578512e-269
6	DUSP1	0.594322	1.37181994730432e-241
6	GRIA4	0.67428	7.283584592389e-222
6	CCNL1	0.63637	1.35875695457291e-208
6	FXYD6	0.517329	1.40917041362529e-196
6	SCD5	0.545166	1.64678039348589e-190
6	MARCKS	0.5013	3.85633514675361e-184
6	MCL1	0.520951	3.02826343505755e-183
6	PHLDA1	0.496492	1.07821001867598e-177
6	BCAN	0.468483	8.9160526016612e-174
6	SHD	0.58537	3.98033876753172e-171
6	PCDHGA7	0.493555	1.09316360721624e-168
6	ID1	0.592201	7.71530056546514e-168
6	ASIC4	0.567346	6.36540521149385e-166
6	SOX4	0.608242	1.72771640320846e-163
6	FAM181B	0.664911	1.72662376159456e-161
6	TNR	0.499064	3.59615549113738e-160
6	HES6	0.50796	1.18642792699071e-159
6	SOX2	0.510292	2.15505011057905e-158
6	HIST1H1E	0.555709	4.31760689544099e-153
6	C11orf96	0.549054	1.02376771906244e-152
6	SOX8	0.509505	2.06213430835136e-152
6	LRATD2	0.535657	3.08206224445922e-147
6	WSB1	0.453383	1.57677733677076e-144
6	C1QL1	0.520649	8.80172749700615e-144
6	UST	0.473684	1.5277976329627e-140
6	H1F0	0.471767	8.16398570641055e-132
6	APC2	0.508809	1.02162224637426e-129
6	HEY1	0.52541	2.23024327239816e-128
6	TCF12	0.458698	4.022345506301e-123
6	RTP5	0.448255	7.09873411426651e-122
6	SMOC1	0.556534	7.87604220584543e-114
6	SCN3A	0.48812	2.79287974151652e-111
6	MYO16	0.466232	2.85805388527017e-110
6	MYC	0.479254	6.21684324747041e-105
6	CCND2	0.591978	1.52990999985252e-102
6	EGFR	0.443848	1.3453156499313e-91
6	SRSF7	0.443959	2.10652269274915e-88
6	TMEM100	0.447509	7.3007272611453e-71
6	EEF1G	0.453198	6.81465505143148e-70
6	HSPA1A	0.45543	1.96374580841453e-53
6	SCG3	0.464683	5.2381108311029e-49
6	ID4	0.550694	6.34249910506788e-47
7	TF	1.17761	0
7	NRGN	1.11764	0
7	SLC17A7	1.07074	0
7	SCD	1.04131	0
7	PLP1	1.02985	0
7	MOG	0.979138	0
7	MBP	0.942033	0
7	SNAP25	0.93628	0
7	UCHL1	0.836475	0
7	NEFL	0.823698	0
7	ATP1B1	0.814241	0
7	DIRAS2	0.803717	0
7	VSNL1	0.800059	0
7	OPALIN	0.763547	0
7	HAPLN2	0.758337	0
7	ENPP2	0.752849	0
7	CAMK2A	0.752183	0
7	DNM1	0.751822	0
7	TUBA4A	0.73417	0
7	CNDP1	0.722487	0
7	AK5	0.688617	0
7	CABP1	0.666322	0
7	DMTN	0.641392	0
7	AQP1	0.937755	8.77253484918351e-301
7	GLUL	0.685831	8.19230637909276e-299
7	CHN1	0.72923	3.39533463540168e-288
7	MOBP	0.857626	1.90316612260472e-283
7	TMEM144	0.738868	4.26235007503155e-281
7	CARNS1	0.711238	3.13418968876111e-280
7	NKX6-2	0.638082	1.41087814833863e-270
7	PTGDS	0.71613	1.08747454986313e-269
7	QDPR	0.89204	3.47900732476807e-266
7	CNTN2	0.700472	4.17809743303273e-263
7	MAG	0.765764	4.15874737643682e-260
7	PPP1R14A	0.796365	1.98679091928439e-258
7	CLDN11	0.747263	7.97540482691635e-258
7	HSPA2	0.705875	3.98940776413815e-250
7	SNCA	0.670345	1.29831142247493e-249
7	MYRF	0.707511	6.08656531308546e-249
7	NPY	1.08398	2.72333266183087e-243
7	S100A1	0.658116	3.94924301586185e-240
7	CNP	0.760507	1.50013558690335e-238
7	ATP1A2	0.675427	2.59855407331696e-227
7	KIF5A	0.68427	6.70948625792139e-227
7	AQP4	0.740188	6.58211756573873e-224
7	DBNDD2	0.647632	8.25982615941798e-208
7	MT3	0.63703	2.57920697347064e-204
7	GJA1	0.68806	8.62781837649274e-199
7	ABCA2	0.645643	3.18644257508751e-188
7	PLAAT3	0.657026	2.10738843840469e-175
8	FN1	5.31342	0
8	COL1A1	4.9892	0
8	CD74	4.55739	0
8	HLA-DRA	4.3321	0
8	PRSS23	4.20492	0
8	VIM	3.77473	0
8	HLA-DPA1	3.65206	0
8	HLA-DPB1	3.64216	0
8	HLA-A	3.62718	0
8	S100A10	3.55805	0
8	SERPINE1	3.54521	0
8	COL5A1	3.41605	0
8	ANXA1	3.41422	0
8	LGALS1	3.35623	0
8	FLNA	3.18867	0
8	S100A11	3.17103	0
8	MYH9	3.16574	0
8	EFEMP1	3.13731	0
8	TGM2	3.0914	0
8	THBS1	3.08712	0
8	IGFBP5	3.03112	0
8	C1R	3.02115	0
8	IFITM10	2.90745	0
8	CCN1	2.83866	0
8	MMP2	2.82409	0
8	ITGB1	2.8114	0
8	KLF6	2.80414	0
8	MLPH	2.74893	0
8	FOSB	2.71386	0
8	LYZ	2.71288	0
8	FCGR3A	2.70175	0
8	CAV1	2.68284	0
8	TIMP1	2.66356	0
8	TAGLN	2.64055	0
8	S100A6	2.62173	0
8	C1QB	2.60119	0
8	FXYD5	2.59025	0
8	HLA-DQA1	2.56174	0
8	AEBP1	2.53977	0
8	CTSD	2.52172	0
8	RGS1	2.51961	0
8	C1QC	2.51503	0
8	EGR1	2.49391	0
8	TMSB4X	2.48698	0
8	NIBAN2	2.48566	0
8	TAGLN2	2.473	0
8	FST	2.46434	0
8	DUSP1	2.42632	0
8	IGFBP2	2.41193	0
8	C1S	2.40724	0
9	HLA-DRA	3.25773	0
9	COL1A1	3.17873	0
9	PRSS23	2.61455	0
9	HLA-DPA1	2.53508	0
9	HLA-DPB1	2.52364	0
9	HLA-A	2.36952	0
9	TGM2	2.28586	0
9	ANXA1	2.2204	0
9	EFEMP1	2.21652	0
9	COL5A1	2.21117	0
9	SERPINE1	2.10325	0
9	C1R	1.97511	0
9	LYZ	1.89984	0
9	THBS1	1.85299	0
9	S100A11	1.81984	0
9	CCN1	1.76698	0
9	FCGR3A	1.7322	0
9	TIMP1	1.68593	0
9	MLPH	1.65234	0
9	RGS1	1.64977	0
9	IGFBP2	1.58365	0
9	FXYD5	1.55607	0
9	MS4A6A	1.54531	0
9	HLA-DQA1	1.53926	0
9	MMP2	1.73956	1.41187123668978e-299
9	C1S	1.57711	1.06074648686947e-283
9	LGALS1	2.17565	2.03634076419335e-241
9	IFITM10	2.09106	5.35684355671095e-233
9	KLF6	1.95513	6.87276169772818e-229
9	S100A10	2.42419	7.84088630826575e-227
9	FN1	3.73739	2.55975744696299e-218
9	FOSB	1.84087	3.20307605941567e-209
9	CD74	3.25925	2.35965749134412e-208
9	VIM	2.51692	1.45208908996863e-205
9	FLNA	2.04093	6.34475067050952e-192
9	TMSB4X	1.8788	8.38498901493752e-189
9	AEBP1	1.58101	3.44482772644791e-185
9	TYROBP	1.62311	1.38202844737501e-183
9	MYH9	2.15941	4.80660433874799e-181
9	MT2A	1.64774	1.99415426724669e-171
9	IGFBP5	2.03561	2.84406239546732e-170
9	CTSD	1.71987	1.02341524804662e-169
9	C1QB	1.76957	2.97617490527125e-169
9	ITGB1	1.68743	1.18536989449428e-167
9	TAGLN2	1.54774	1.60674696070398e-165
9	JUNB	1.71448	4.4121588439501e-159
9	C1QC	1.5821	4.38936960334802e-158
9	ZFP36L2	1.53839	9.32954371888697e-148
9	EGR1	1.56508	3.62727653566648e-145
9	S100A6	1.60915	4.99150025524458e-145
10	ST6GAL2	2.15682	6.1259427173127e-292
10	CRYBG3	1.32451	5.16121627745491e-282
10	WNT7B	1.13399	3.43385344236381e-265
10	CTSH	1.14614	6.21345547846256e-236
10	UST	1.4562	1.27196513552668e-203
10	KLRC4	1.03695	4.8120821159596e-192
10	TMEM100	1.64826	1.08678989799633e-189
10	IQSEC2	1.36549	2.52543078796348e-187
10	VIPR2	1.03271	2.43409180643333e-178
10	GPR158	1.25393	2.59581986701287e-173
10	SOX5	1.11241	4.39920630301825e-161
10	DDX17	1.21921	2.59552579304902e-158
10	ID4	1.79216	2.75837128176669e-158
10	SCD5	1.34082	3.12035271381912e-157
10	DDIT4	1.58931	5.00826532772319e-154
10	TSC22D1	1.36543	2.48443838068525e-150
10	GNAZ	1.09492	9.47886216868863e-148
10	LUZP2	1.20087	1.53703042083392e-147
10	SCG3	1.5414	1.43684237401667e-145
10	GRK3	1.09821	3.01336090941299e-145
10	BCR	1.32831	7.12385986216254e-145
10	RHBDL3	1.07627	1.25401622189797e-144
10	MAFB	1.02009	7.42947938864818e-144
10	HIST1H4D	1.48088	8.50350463458402e-139
10	HSPA1B	1.50381	1.96201755749886e-138
10	PHF19	1.31663	1.08494785009927e-135
10	UNC80	1.26808	1.01078947955014e-130
10	FXYD6	1.12196	1.48668160314585e-130
10	TXNIP	1.18641	2.24580125437833e-129
10	ZBTB20	1.10273	1.78085060637644e-127
10	PIK3R1	1.11059	6.9055858641821e-127
10	H3F3B	1.04219	1.56269532814386e-126
10	NRCAM	1.12709	2.3383641540678e-124
10	ATP13A4	1.10752	4.45869173767998e-122
10	ZBTB16	1.12469	1.15252626700541e-121
10	DPYSL3	1.0083	4.25894229471445e-121
10	NFIB	1.03596	2.80986315844382e-119
10	GRIA4	1.13063	1.37695837816889e-118
10	OPHN1	1.09152	1.18097189631327e-116
10	ST13	1.01235	1.6525217843341e-116
10	ASIC4	1.08474	7.00881441889178e-116
10	SEZ6L	1.09169	2.80687420591326e-115
10	SH3GL2	1.04526	7.04785964778212e-114
10	TCF12	1.03491	7.6090055781636e-107
10	GALNT13	1.00961	1.18491081967125e-106
10	FAM110B	1.02809	1.86848411292509e-103
10	EGFR	1.03409	2.25522538903679e-103
10	SLC4A4	1.03592	4.73126845433672e-102
10	MT1X	1.16014	7.45072636653076e-101
10	GADD45G	1.01035	2.98661625460547e-93
11	TMEM132B	0.596723	1.76957868693198e-26
11	RBM8A	0.421781	2.10316697030804e-25
11	CALCOCO1	0.409549	3.1052168780125e-24
11	ZDHHC20	0.380892	2.30627907564786e-23
11	PFKL	0.435069	1.41595870370693e-22
11	SEPTIN9	0.372868	3.3057651865956e-22
11	CGGBP1	0.356798	9.09871484391166e-22
11	PTPN12	0.367099	1.19266954122345e-21
11	HSP90B1	0.424728	2.5413136266056e-21
11	POLR2K	0.363628	3.46133841030198e-21
11	FAM50A	0.348308	4.80325541119113e-21
11	SCP2	0.363022	7.50260511026118e-21
11	GNA13	0.388594	1.05403702498883e-20
11	IGSF11	0.389585	1.37027272015981e-20
11	NAP1L3	0.357543	1.38603029861939e-20
11	TMEM263	0.355185	3.13380029472696e-20
11	PPP1R10	0.358729	3.38014404972699e-20
11	RNF145	0.349785	4.49971945129292e-20
11	SPAG7	0.346229	5.74475681845152e-20
11	CDC34	0.361477	6.96206007540896e-20
11	ABCG1	0.383545	1.40605289288417e-19
11	FBXL17	0.385901	1.54109688342174e-19
11	NDUFA3	0.356822	1.86339836038328e-19
11	SKIL	0.366746	2.01521380255835e-19
11	CAMK2D	0.347202	2.42532648117413e-19
11	SEMA6A	0.447616	6.71744174358431e-19
11	SLC39A6	0.3573	1.37301705701073e-18
11	SPOCK1	0.447294	2.01513099733246e-18
11	C11orf96	0.353772	2.86207957029152e-18
11	UBE2L6	0.345259	7.25028341072861e-18
11	HMBOX1	0.35093	1.99115062893944e-17
11	ANAPC11	0.404429	3.61739917527145e-17
11	TIA1	0.37311	4.3627820080278e-17
11	VMP1	0.421225	8.88426259050225e-17
11	RABGAP1L	0.349945	1.54578390404717e-16
11	TMCO1	0.407908	2.17342772479445e-16
11	TFDP1	0.374965	4.22308683997835e-16
11	TRIB2	0.416371	1.00997575998217e-15
11	H2AFY	0.371214	1.09090322730117e-15
11	ATP13A4	0.3539	2.29618065953616e-15
11	TMOD1	0.393869	3.05558476991259e-15
11	CDH2	0.36119	1.5657044899129e-14
11	CLPTM1	0.352288	3.0929731459053e-14
11	MAPK8IP1	0.351541	3.66231086014189e-14
11	RWDD1	0.363994	7.64270995687846e-13
11	AGAP9	0.344734	3.08509339921983e-11
11	EYA1	0.364597	3.94514735730658e-09
11	EIF1AX	0.343564	1.23150464690662e-08
11	ZFAND3	0.362249	2.97287277730682e-08
11	AFDN	0.34518	6.74820058068702e-08
12	PENK	2.90731	0
12	ANO3	2.12236	0
12	RGS14	1.43146	0
12	GPR88	1.18173	0
12	SYNDIG1L	1.08815	0
12	PCP4	3.24775	1.47352593535967e-207
12	TAC1	1.31886	1.22617861384173e-194
12	PTPN5	2.01413	1.15373034387801e-190
12	ADORA2A	1.1189	2.97865261015453e-182
12	PDE1B	2.07258	2.51834475232369e-180
12	CALB1	1.09616	1.60766073214341e-177
12	NNAT	1.85226	3.9914908481355e-164
12	PDE10A	1.38861	5.71016015922818e-163
12	SYNPR	1.59841	2.43615685253236e-154
12	HPCA	2.54882	6.8432879371883e-149
12	SCN4B	1.34571	1.36931228228462e-144
12	PPP1R1B	2.81512	1.48359225589004e-127
12	KCNAB1	1.14468	8.35704421492826e-114
12	NGEF	1.45438	2.68045579570395e-106
12	CAMKV	1.48237	1.17870492534697e-102
12	SOWAHA	1.24306	4.14177636109058e-98
12	YJEFN3	1.2934	2.682930790076e-82
12	ADCY5	1.17732	6.0174938659879e-80
12	PRKCB	1.14189	3.13935918544205e-78
12	ARPP21	2.5277	6.36404655575584e-76
12	RAP1GAP	1.69108	3.3409869330717e-74
12	NCDN	2.29027	5.1339749945853e-72
12	CRYM	1.142	5.09432996503402e-71
12	KCTD17	1.09638	1.70480088702308e-64
12	GNG7	1.75781	3.19145062428698e-61
12	CTXN1	1.69274	1.47101825668695e-60
12	ATP2B1	1.48386	4.71343542590898e-60
12	DDN	1.05521	6.10037175020737e-59
12	ARPP19	1.34511	2.48969679903961e-56
12	FBXL16	1.35544	2.45850032647657e-54
12	PHACTR1	1.55943	4.46058253687651e-54
12	PPP3CA	1.38823	9.68968343897487e-50
12	DGKB	1.20068	6.71294102814311e-45
12	PEG3	1.0996	1.39208940897969e-44
12	NRGN	1.34647	7.00852069090644e-44
12	LRPAP1	1.07032	1.51246349385158e-42
12	THY1	1.13209	6.63503325471493e-42
12	DKK3	1.23889	6.83730230832705e-39
12	MXRA7	1.07977	3.00289743091417e-38
12	PPP1R1A	1.07853	3.38905813999045e-37
12	KCNIP2	1.07691	6.71216337149209e-37
12	AGAP2	1.11381	5.08927598625817e-32
12	HSPA1B	1.42776	9.48640962827867e-12
12	HSPA1A	1.65904	1.34581107689024e-09
12	FAM181B	1.04505	3.43985197009151e-06
13	OR6C4	0.754337	3.75986690357989e-238
13	PENK	0.756585	9.60970396665014e-185
13	PCP4	1.5098	2.51485829428162e-133
13	C21orf62	0.839529	3.62727826325504e-116
13	ST6GAL2	1.32482	1.21939295580468e-77
13	CENPV	0.846794	1.24387465487301e-76
13	CRYBG3	0.902036	1.00308239005086e-67
13	KLRC4	1.04179	6.84142131085928e-58
13	FXYD6	1.24732	1.18986074381764e-54
13	HPCA	0.884744	7.33761450208993e-52
13	PCDH15	1.16547	4.80137068980002e-51
13	S100B	1.03136	2.86676435871841e-50
13	ID4	1.34121	1.2884434619678e-49
13	UST	1.01561	1.63684563434637e-47
13	PRCP	0.965974	5.74635996622144e-47
13	GABBR1	1.02976	7.68417537991333e-47
13	FAM181B	1.30054	9.5050652327379e-47
13	PCDHGB5	0.800545	1.09512584598129e-44
13	UNC80	1.10378	6.32111925178332e-43
13	PPP1R1B	0.967495	1.97274306426793e-42
13	TIMP2	1.07159	2.99125832176425e-42
13	ATRNL1	1.16868	9.06845345304706e-42
13	PHYHIPL	1.01938	4.920743709537e-41
13	NKD1	1.13034	6.03869822052498e-41
13	HIST1H4D	1.13011	9.32542499109747e-41
13	FAM110B	1.04281	7.82503102141506e-38
13	EGFR	1.06031	1.81908900717555e-37
13	GLCCI1	0.862868	2.29401630388452e-37
13	SESN3	0.902952	1.98451469951819e-35
13	DPYSL3	0.90507	1.28603448121657e-34
13	NCAM1	0.863991	1.28847783835901e-34
13	ZBTB20	0.8783	1.74018815468214e-34
13	LUZP2	0.868075	5.74044461750315e-33
13	OPHN1	0.955636	7.57142929414685e-33
13	MAP2	0.854936	1.61788190389957e-31
13	SEPTIN3	0.824693	1.63064726818107e-31
13	LRRN1	0.913467	6.50085146876751e-31
13	CNIH2	0.751367	1.8309554802488e-29
13	ABCC8	0.839276	4.15188234744332e-29
13	H1F0	0.801022	5.47935875074759e-29
13	ADCYAP1R1	0.868947	5.60560618917242e-29
13	SH3GL2	0.837481	1.1749099953989e-27
13	GRIA4	0.823073	9.65212889296377e-27
13	LRATD2	0.793437	1.5614140845986e-26
13	SLC4A4	0.777025	1.07325351844544e-24
13	SEZ6L	0.80282	3.55740284482578e-23
13	KLRC3	0.758531	4.72809291583658e-22
13	GALNT13	0.74947	4.09628932554774e-21
13	ARPP21	0.7333	5.40108643867578e-21
13	SOX6	0.739962	2.19577632701913e-20
14	KIF5A	1.80889	8.45413876836347e-16
14	NEFL	1.00449	1.01714530281315e-06
14	MBP	0.885689	4.99679765183927e-06
14	CAMK2A	1.03202	0.000122992
14	DDRGK1	0.868297	0.000155567
14	NCDN	0.700737	0.00119798
14	SNAP25	0.506733	0.00130592
14	OLFM1	0.501535	0.00776451
14	UCHL1	0.577621	0.0153096
14	EGR1	0.558189	0.0166373
14	NCS1	0.70297	0.023463
14	ARF3	0.546103	0.0292109
14	FOS	0.601751	0.0384826
14	EEF1A2	0.441216	0.0393836
14	MTURN	0.549979	0.0454346
14	CPLX2	0.503666	0.0755873
14	GOLPH3	0.561422	0.269744
14	BTG2	0.435597	0.419939
14	MAP1B	0.658263	0.544429
14	PPP3CA	0.559359	0.719326
14	SNCB	0.693919	0.725476
14	NEFM	0.857137	0.757523
14	PRKAR1B	0.715911	0.922709
14	SEPTIN5	0.550149	1
14	EPB41L1	0.438508	1
14	CAMK2N1	0.519848	1
14	PHACTR1	0.488839	1
14	IER2	0.655843	1
14	FOSB	0.595548	1
14	CBX6	0.59435	1
14	PPP1R9B	0.535245	1
14	SOWAHA	0.482993	1
14	KIF5B	0.508544	1
14	IDS	0.628708	1
14	ATRNL1	0.486158	1
14	FKBP8	0.45503	1
14	HLA-E	0.440272	1
14	UNC80	0.438261	1
14	TP53INP2	0.494098	1
14	KIF5C	0.534745	1
14	RAPGEF4	0.917733	1
14	AURKAIP1	0.601056	1
14	PDZD4	0.502074	1
14	HDGF	0.453953	1
14	VSNL1	0.658653	1
14	MRFAP1L1	0.463627	1
14	CA11	0.542968	1
14	PLEKHM2	0.747297	1
14	NUDC	0.646407	1
14	DDN	0.51976	1

## Sheet: Supplementary_Table_4
Supplementary Table 4. Oligodendroglioma spatial transcritomic metadata.
barcode	spatial_transcriptomic_clusters	sample_ID	WHO_Grade	primary_or_recurrent	transition	celltype_custom	G2G3TMEclusters	clinical_comparison	inferCNV	inferCNV_clones	S.Score	G2M.Score	Phase
A_AAACATTTCCCGGATT-1	0	KM4242_01	3	Primary	3 --> 3	Proneural_OPC_like_tumor	NA	Pri_Recurrence_after_TMZ	1p_19q_codeleted	CNA_Group_ 1	9.9567593046217706E-2	-1.0611912318026001E-2	S
A_AAACCGGGTAGGTACC-1	0	KM4242_01	3	Primary	3 --> 3	Proneural_OPC_like_tumor	G3	Pri_Recurrence_after_TMZ	1p_19q_codeleted	CNA_Group_ 1	4.1307312485044198E-2	-2.3475696129414299E-2	S
A_AAACCGTTCGTCCAGG-1	0	KM4242_01	3	Primary	3 --> 3	Proneural_OPC_like_tumor	G3	Pri_Recurrence_after_TMZ	1p_19q_codeleted	CNA_Group_ 1	-3.41236777945342E-2	-3.5706880182558E-2	G1
A_AAACCTAAGCAGCCGG-1	0	KM4242_01	3	Primary	3 --> 3	Proneural_OPC_like_tumor	G3	Pri_Recurrence_after_TMZ	1p_19q_codeleted	CNA_Group_ 1	-1.1083439932910701E-2	2.32438140913265E-2	G2M
A_AAACCTCATGAAGTTG-1	5	KM4242_01	3	Primary	3 --> 3	NPC_like_and_DNA_damage	G3	Pri_Recurrence_after_TMZ	1p_19q_codeleted	CNA_Group_ 1	8.9528925005430998E-2	1.5929884719506199E-2	S
A_AAACGAGACGGTTGAT-1	1	KM4242_01	3	Primary	3 --> 3	Oligodendrocyte_like_tumor	NA	Pri_Recurrence_after_TMZ	1p_19q_codeleted	CNA_Group_ 2	-3.51857808122297E-2	2.1724871452001301E-2	G2M
A_AAACGGGCGTACGGGT-1	0	KM4242_01	3	Primary	3 --> 3	Proneural_OPC_like_tumor	G3	Pri_Recurrence_after_TMZ	1p_19q_codeleted	CNA_Group_ 1	0.103931664137713	7.7851581228627897E-3	S
A_AAACTCGGTTCGCAAT-1	0	KM4242_01	3	Primary	3 --> 3	Proneural_OPC_like_tumor	G3	Pri_Recurrence_after_TMZ	1p_19q_codeleted	CNA_Group_ 2	2.1562627696943001E-2	2.5129567631316199E-2	G2M
A_AAACTGCTGGCTCCAA-1	0	KM4242_01	3	Primary	3 --> 3	Proneural_OPC_like_tumor	G3	Pri_Recurrence_after_TMZ	1p_19q_codeleted	CNA_Group_ 1	-1.19764890184799E-2	-2.3893173945756001E-2	G1
A_AAAGACTGGGCGCTTT-1	0	KM4242_01	3	Primary	3 --> 3	Proneural_OPC_like_tumor	G3	Pri_Recurrence_after_TMZ	1p_19q_codeleted	CNA_Group_ 3	2.0926211014322599E-2	-3.1427654853983397E-2	S
A_AAAGGCTCTCGCGCCG-1	0	KM4242_01	3	Primary	3 --> 3	Proneural_OPC_like_tumor	G3	Pri_Recurrence_after_TMZ	1p_19q_codeleted	CNA_Group_ 1	-3.8950148986669798E-3	4.3815141437498602E-2	G2M
A_AAAGGGATGTAGCAAG-1	1	KM4242_01	3	Primary	3 --> 3	Oligodendrocyte_like_tumor	NA	Pri_Recurrence_after_TMZ	1p_19q_codeleted	CNA_Group_ 2	-7.6265666320000203E-2	2.4001536920420698E-2	G2M
A_AAAGGGCAGCTTGAAT-1	4	KM4242_01	3	Primary	3 --> 3	Pericyte_Endothelial	Pericyte_Endothelial	Pri_Recurrence_after_TMZ	1p_19q_codeleted	CNA_Group_ 2	-3.9470262422160798E-2	-5.3873267451791301E-2	G1
A_AAAGTCGACCCTCAGT-1	0	KM4242_01	3	Primary	3 --> 3	Proneural_OPC_like_tumor	G3	Pri_Recurrence_after_TMZ	1p_19q_codeleted	CNA_Group_ 1	-6.6114902057431398E-3	-7.2040677358879798E-2	G1
A_AAATACCTATAAGCAT-1	0	KM4242_01	3	Primary	3 --> 3	Proneural_OPC_like_tumor	G3	Pri_Recurrence_after_TMZ	1p_19q_codeleted	CNA_Group_ 1	2.1378139468817701E-2	-7.3251576991032897E-3	S
A_AAATAGGGTGCTATTG-1	6	KM4242_01	3	Primary	3 --> 3	IEG	G3	Pri_Recurrence_after_TMZ	1p_19q_codeleted	CNA_Group_ 1	1.31227041007448E-2	4.2684807533234101E-2	G2M
A_AAATCCGATACACGCC-1	0	KM4242_01	3	Primary	3 --> 3	Proneural_OPC_like_tumor	G3	Pri_Recurrence_after_TMZ	1p_19q_codeleted	CNA_Group_ 1	2.4705464450915399E-2	6.4857289434458202E-3	S
A_AAATCGTGTACCACAA-1	0	KM4242_01	3	Primary	3 --> 3	Proneural_OPC_like_tumor	G3	Pri_Recurrence_after_TMZ	1p_19q_codeleted	CNA_Group_ 1	7.2681031006925995E-2	-7.4387704712972598E-3	S
A_AAATGGTCAATGTGCC-1	0	KM4242_01	3	Primary	3 --> 3	Proneural_OPC_like_tumor	G3	Pri_Recurrence_after_TMZ	1p_19q_codeleted	CNA_Group_ 1	8.1157115251215307E-3	-1.54382390054663E-2	S
A_AAATTAACGGGTAGCT-1	0	KM4242_01	3	Primary	3 --> 3	Proneural_OPC_like_tumor	G3	Pri_Recurrence_after_TMZ	1p_19q_codeleted	CNA_Group_ 1	5.25476989302898E-2	5.4786151543248403E-2	G2M
A_AAATTACCTATCGATG-1	1	KM4242_01	3	Primary	3 --> 3	Oligodendrocyte_like_tumor	NA	Pri_Recurrence_after_TMZ	1p_19q_codeleted	CNA_Group_ 3	-3.4583382677618601E-4	-2.3318852298355699E-2	G1
A_AAATTTGCGGGTGTGG-1	0	KM4242_01	3	Primary	3 --> 3	Proneural_OPC_like_tumor	G3	Pri_Recurrence_after_TMZ	1p_19q_codeleted	CNA_Group_ 1	3.5748470338825599E-4	1.3329718700571799E-2	G2M
A_AACAACTGGTAGTTGC-1	0	KM4242_01	3	Primary	3 --> 3	Proneural_OPC_like_tumor	G3	Pri_Recurrence_after_TMZ	1p_19q_codeleted	CNA_Group_ 1	-3.1775658731108401E-2	-2.2188073399448502E-3	G1
A_AACAATTACTCTACGC-1	2	KM4242_01	3	Primary	3 --> 3	NPC_like_tumor	G3	Pri_Recurrence_after_TMZ	non_tumor	NA	1.85460778898285E-2	-3.3604600772668199E-2	S
A_AACAGGAAATCGAATA-1	4	KM4242_01	3	Primary	3 --> 3	Pericyte_Endothelial	Pericyte_Endothelial	Pri_Recurrence_after_TMZ	non_tumor	CNA_Group_ 2	4.9421565571848701E-2	-3.4440405512374497E-2	S
A_AACAGGATGGGCCGCG-1	0	KM4242_01	3	Primary	3 --> 3	Proneural_OPC_like_tumor	G3	Pri_Recurrence_after_TMZ	1p_19q_codeleted	CNA_Group_ 1	5.8456083856918403E-2	6.2935848768258307E-2	G2M
A_AACCAAGACTTCTCTG-1	5	KM4242_01	3	Primary	3 --> 3	NPC_like_and_DNA_damage	G3	Pri_Recurrence_after_TMZ	1p_19q_codeleted	CNA_Group_ 1	6.0355457990601304E-3	4.7430375026570604E-3	S
A_AACCCAGAGACGGAGA-1	1	KM4242_01	3	Primary	3 --> 3	Oligodendrocyte_like_tumor	NA	Pri_Recurrence_after_TMZ	1p_19q_codeleted	CNA_Group_ 2	-4.0977866361387998E-2	-2.5508597698303902E-2	G1
A_AACCGAGCTTGGTCAT-1	1	KM4242_01	3	Primary	3 --> 3	Oligodendrocyte_like_tumor	NA	Pri_Recurrence_after_TMZ	1p_19q_codeleted	CNA_Group_ 3	9.3864271455168808E-3	-1.52308347962641E-2	S
A_AACCTCGCTTTAGCCC-1	0	KM4242_01	3	Primary	3 --> 3	Proneural_OPC_like_tumor	G3	Pri_Recurrence_after_TMZ	1p_19q_codeleted	CNA_Group_ 1	7.7860537624298995E-2	6.93881644714789E-2	S
A_AACCTTTAAATACGGT-1	0	KM4242_01	3	Primary	3 --> 3	Proneural_OPC_like_tumor	G3	Pri_Recurrence_after_TMZ	1p_19q_codeleted	CNA_Group_ 2	9.6958316809882594E-2	-2.3500793300553699E-2	S
A_AACGATAATGCCGTAG-1	0	KM4242_01	3	Primary	3 --> 3	Proneural_OPC_like_tumor	G3	Pri_Recurrence_after_TMZ	1p_19q_codeleted	CNA_Group_ 1	-2.0481626049096199E-2	-2.1330213777734099E-3	G1
A_AACGATAGAAGGGCCG-1	1	KM4242_01	3	Primary	3 --> 3	Oligodendrocyte_like_tumor	NA	Pri_Recurrence_after_TMZ	1p_19q_codeleted	CNA_Group_ 3	-3.5998833132294898E-2	6.1025992732636598E-2	G2M
A_AACGATATGTCAACTG-1	1	KM4242_01	3	Primary	3 --> 3	Oligodendrocyte_like_tumor	NA	Pri_Recurrence_after_TMZ	1p_19q_codeleted	CNA_Group_ 3	-8.8831685639636903E-3	2.78203224396067E-2	G2M
A_AACGCGGTCTCCAGCC-1	1	KM4242_01	3	Primary	3 --> 3	Oligodendrocyte_like_tumor	NA	Pri_Recurrence_after_TMZ	1p_19q_codeleted	CNA_Group_ 3	-1.9781012069851299E-2	1.90860419880523E-3	G2M
A_AACGGCCATCTCCGGT-1	0	KM4242_01	3	Primary	3 --> 3	Proneural_OPC_like_tumor	G3	Pri_Recurrence_after_TMZ	1p_19q_codeleted	CNA_Group_ 1	-4.4234232998236103E-2	-0.10085867383281399	G1
A_AACGTACTGTGGGTAC-1	0	KM4242_01	3	Primary	3 --> 3	Proneural_OPC_like_tumor	G3	Pri_Recurrence_after_TMZ	1p_19q_codeleted	CNA_Group_ 1	-8.9626177351344399E-2	-2.9209097882487801E-2	G1
A_AACGTCAGACTAGTGG-1	0	KM4242_01	3	Primary	3 --> 3	Proneural_OPC_like_tumor	G3	Pri_Recurrence_after_TMZ	1p_19q_codeleted	CNA_Group_ 1	3.5039421858153699E-3	2.1779443270730298E-2	G2M
A_AACGTGCGAAAGTCTC-1	1	KM4242_01	3	Primary	3 --> 3	Oligodendrocyte_like_tumor	NA	Pri_Recurrence_after_TMZ	1p_19q_codeleted	CNA_Group_ 1	4.4016294828666598E-2	-1.4774119649822901E-2	S
A_AACTAGGCTTGGGTGT-1	0	KM4242_01	3	Primary	3 --> 3	Proneural_OPC_like_tumor	G3	Pri_Recurrence_after_TMZ	1p_19q_codeleted	CNA_Group_ 2	7.3788644465616504E-2	2.4096423005211198E-2	S
A_AACTCAAGTTAATTGC-1	0	KM4242_01	3	Primary	3 --> 3	Proneural_OPC_like_tumor	G3	Pri_Recurrence_after_TMZ	1p_19q_codeleted	CNA_Group_ 2	4.6261599953023001E-2	-2.6579696670365801E-2	S
A_AACTCTCAATAGAGCG-1	3	KM4242_01	3	Primary	3 --> 3	RBCs	RBCs	Pri_Recurrence_after_TMZ	non_tumor	CNA_Group_ 2	-3.7866538817929597E-2	-4.2765674056177698E-2	G1
A_AACTGATATTAGGCCT-1	1	KM4242_01	3	Primary	3 --> 3	Oligodendrocyte_like_tumor	NA	Pri_Recurrence_after_TMZ	1p_19q_codeleted	CNA_Group_ 3	-2.8989755970883599E-3	-1.25739979838435E-2	G1
A_AACTGGGTCCCGACGT-1	1	KM4242_01	3	Primary	3 --> 3	Oligodendrocyte_like_tumor	NA	Pri_Recurrence_after_TMZ	1p_19q_codeleted	CNA_Group_ 2	4.1836168437205399E-3	-4.4153249252967403E-2	S
A_AACTTGCCCGTATGCA-1	0	KM4242_01	3	Primary	3 --> 3	Proneural_OPC_like_tumor	G3	Pri_Recurrence_after_TMZ	1p_19q_codeleted	CNA_Group_ 3	2.16452092381729E-2	-3.3690063736993001E-2	S
A_AAGACCCAACTGAACA-1	0	KM4242_01	3	Primary	3 --> 3	Proneural_OPC_like_tumor	G3	Pri_Recurrence_after_TMZ	1p_19q_codeleted	CNA_Group_ 1	0.158255671672485	-5.9778701811605599E-2	S
A_AAGACTGCAAGCTACT-1	0	KM4242_01	3	Primary	3 --> 3	Proneural_OPC_like_tumor	NA	Pri_Recurrence_after_TMZ	1p_19q_codeleted	CNA_Group_ 1	6.2905501994351701E-2	-9.2982443127909709E-3	S
A_AAGAGATGAATCGGTA-1	0	KM4242_01	3	Primary	3 --> 3	Proneural_OPC_like_tumor	G3	Pri_Recurrence_after_TMZ	1p_19q_codeleted	CNA_Group_ 1	-5.5490932137928703E-2	9.4453015859108402E-4	G2M
A_AAGAGCTCTTTATCGG-1	1	KM4242_01	3	Primary	3 --> 3	Oligodendrocyte_like_tumor	NA	Pri_Recurrence_after_TMZ	1p_19q_codeleted	CNA_Group_ 3	3.5844483076823003E-2	2.8574869186677902E-2	S
A_AAGAGGATGTACGCGA-1	4	KM4242_01	3	Primary	3 --> 3	Pericyte_Endothelial	Pericyte_Endothelial	Pri_Recurrence_after_TMZ	1p_19q_codeleted	CNA_Group_ 1	3.3025263890172497E-2	-2.09389825791295E-3	S
A_AAGAGGCATGGATCGC-1	1	KM4242_01	3	Primary	3 --> 3	Oligodendrocyte_like_tumor	NA	Pri_Recurrence_after_TMZ	1p_19q_codeleted	CNA_Group_ 1	-9.2045071905896697E-3	9.0915947071841096E-3	G2M
A_AAGATTGGCGGAACGT-1	1	KM4242_01	3	Primary	3 --> 3	Oligodendrocyte_like_tumor	NA	Pri_Recurrence_after_TMZ	1p_19q_codeleted	CNA_Group_ 5	2.0178825593838599E-3	-1.6258746000082001E-2	S
A_AAGCACCCTGCGTATC-1	0	KM4242_01	3	Primary	3 --> 3	Proneural_OPC_like_tumor	G3	Pri_Recurrence_after_TMZ	1p_19q_codeleted	CNA_Group_ 1	-4.7593437748233696E-3	5.60032135115283E-3	G2M
A_AAGCATACTCTCCTGA-1	0	KM4242_01	3	Primary	3 --> 3	Proneural_OPC_like_tumor	G3	Pri_Recurrence_after_TMZ	1p_19q_codeleted	CNA_Group_ 1	3.0842773705574499E-2	1.3522091238718901E-2	S
A_AAGCGCAGGGCTTTGA-1	0	KM4242_01	3	Primary	3 --> 3	Proneural_OPC_like_tumor	G3	Pri_Recurrence_after_TMZ	1p_19q_codeleted	CNA_Group_ 1	3.3554761016450999E-3	1.8752419772457798E-2	G2M
A_AAGCTAGATCGAGTAA-1	0	KM4242_01	3	Primary	3 --> 3	Proneural_OPC_like_tumor	G3	Pri_Recurrence_after_TMZ	1p_19q_codeleted	CNA_Group_ 2	-2.85967697049038E-2	-9.4586474808276994E-3	G1
A_AAGCTCGTGCCAAGTC-1	1	KM4242_01	3	Primary	3 --> 3	Oligodendrocyte_like_tumor	NA	Pri_Recurrence_after_TMZ	1p_19q_codeleted	CNA_Group_ 3	7.9398292939512494E-3	-1.63570049287842E-2	S
A_AAGCTCTTTCATGGTG-1	6	KM4242_01	3	Primary	3 --> 3	IEG	G3	Pri_Recurrence_after_TMZ	1p_19q_codeleted	CNA_Group_ 1	4.7119836582332701E-2	5.3267917061969004E-3	S
A_AAGGAGCGGTTGGTGC-1	0	KM4242_01	3	Primary	3 --> 3	Proneural_OPC_like_tumor	G3	Pri_Recurrence_after_TMZ	1p_19q_codeleted	CNA_Group_ 3	2.8650971499527798E-2	-3.6993718220274502E-2	S
A_AAGGATGAGGGACCTC-1	1	KM4242_01	3	Primary	3 --> 3	Oligodendrocyte_like_tumor	NA	Pri_Recurrence_after_TMZ	1p_19q_codeleted	CNA_Group_ 2	-3.12226825820826E-3	-5.2601914870382502E-2	G1
A_AAGGCGCGTAAAGCTT-1	0	KM4242_01	3	Primary	3 --> 3	Proneural_OPC_like_tumor	G3	Pri_Recurrence_after_TMZ	1p_19q_codeleted	CNA_Group_ 1	-1.6166545532261201E-2	-1.1292635151762801E-2	G1
A_AAGGCTGTGCTCATCG-1	0	KM4242_01	3	Primary	3 --> 3	Proneural_OPC_like_tumor	G3	Pri_Recurrence_after_TMZ	1p_19q_codeleted	CNA_Group_ 3	6.3163050387063505E-2	0.167927820363235	G2M
A_AAGGGACAGATTCTGT-1	1	KM4242_01	3	Primary	3 --> 3	Oligodendrocyte_like_tumor	NA	Pri_Recurrence_after_TMZ	1p_19q_codeleted	CNA_Group_ 5	3.2088829416527902E-3	-3.4777094774778597E-2	S
A_AAGGTATCCTAATATA-1	1	KM4242_01	3	Primary	3 --> 3	Oligodendrocyte_like_tumor	NA	Pri_Recurrence_after_TMZ	1p_19q_codeleted	CNA_Group_ 2	3.14596075938718E-3	-3.7161002404518799E-2	S
A_AAGTAGAAGACCGGGT-1	0	KM4242_01	3	Primary	3 --> 3	Proneural_OPC_like_tumor	NA	Pri_Recurrence_after_TMZ	1p_19q_codeleted	CNA_Group_ 1	-5.24471824388427E-2	-3.2163557165287598E-2	G1
A_AAGTAGTGACGCGAGG-1	0	KM4242_01	3	Primary	3 --> 3	Proneural_OPC_like_tumor	G3	Pri_Recurrence_after_TMZ	1p_19q_codeleted	CNA_Group_ 1	-3.7751193082111701E-3	1.43293592449999E-2	G2M
A_AAGTGACGACCGAATT-1	0	KM4242_01	3	Primary	3 --> 3	Proneural_OPC_like_tumor	G3	Pri_Recurrence_after_TMZ	1p_19q_codeleted	CNA_Group_ 1	6.7803084244152503E-2	-5.09975820985345E-2	S
A_AAGTGTTTGGAGACGG-1	6	KM4242_01	3	Primary	3 --> 3	IEG	G3	Pri_Recurrence_after_TMZ	1p_19q_codeleted	CNA_Group_ 1	-1.6253478690865901E-2	-3.3883793279915198E-2	G1
A_AAGTTCACTCCAAGCT-1	0	KM4242_01	3	Primary	3 --> 3	Proneural_OPC_like_tumor	G3	Pri_Recurrence_after_TMZ	1p_19q_codeleted	CNA_Group_ 1	1.7994726571454501E-2	2.1838798709747E-2	G2M
A_AAGTTCGGCCAACAGG-1	0	KM4242_01	3	Primary	3 --> 3	Proneural_OPC_like_tumor	G3	Pri_Recurrence_after_TMZ	1p_19q_codeleted	CNA_Group_ 1	-2.0864300745321699E-2	4.6688269838762599E-2	G2M
A_AAGTTTATGGGCCCAA-1	0	KM4242_01	3	Primary	3 --> 3	Proneural_OPC_like_tumor	G3	Pri_Recurrence_after_TMZ	1p_19q_codeleted	CNA_Group_ 1	0.12628075587950899	-1.88704959071085E-2	S
A_AATAACAACGCTCGGC-1	0	KM4242_01	3	Primary	3 --> 3	Proneural_OPC_like_tumor	G3	Pri_Recurrence_after_TMZ	1p_19q_codeleted	CNA_Group_ 1	7.1146477703233804E-2	-3.2931716740233499E-2	S
A_AATACAATGTTTCAGG-1	0	KM4242_01	3	Primary	3 --> 3	Proneural_OPC_like_tumor	G3	Pri_Recurrence_after_TMZ	1p_19q_codeleted	CNA_Group_ 3	-1.4760751525123199E-2	-8.3093178590376404E-2	G1
A_AATAGAACAGAGTGGC-1	0	KM4242_01	3	Primary	3 --> 3	Proneural_OPC_like_tumor	G3	Pri_Recurrence_after_TMZ	1p_19q_codeleted	CNA_Group_ 1	4.5007312389967302E-2	-4.6840164650655901E-2	S
A_AATAGAATCTGTTTCA-1	0	KM4242_01	3	Primary	3 --> 3	Proneural_OPC_like_tumor	NA	Pri_Recurrence_after_TMZ	1p_19q_codeleted	CNA_Group_ 1	0.116743432444643	0.10330480768033801	S
A_AATAGTCCGTCCCGAC-1	0	KM4242_01	3	Primary	3 --> 3	Proneural_OPC_like_tumor	G3	Pri_Recurrence_after_TMZ	1p_19q_codeleted	CNA_Group_ 2	0.12608403256210299	-9.97921004744989E-3	S
A_AATATTGGAGTATTGA-1	5	KM4242_01	3	Primary	3 --> 3	NPC_like_and_DNA_damage	G3	Pri_Recurrence_after_TMZ	non_tumor	CNA_Group_ 1	-3.2415881820045601E-2	-4.1364394838803803E-2	G1
A_AATCGCCTCAGCGCCA-1	1	KM4242_01	3	Primary	3 --> 3	Oligodendrocyte_like_tumor	NA	Pri_Recurrence_after_TMZ	1p_19q_codeleted	CNA_Group_ 1	-3.9747595930399601E-2	7.3587110555585103E-2	G2M
A_AATCGTGAGCCGAGCA-1	0	KM4242_01	3	Primary	3 --> 3	Proneural_OPC_like_tumor	G3	Pri_Recurrence_after_TMZ	1p_19q_codeleted	CNA_Group_ 1	9.7772642575146701E-2	-4.6774430202143502E-2	S
A_AATCTGCGTTGGGACG-1	1	KM4242_01	3	Primary	3 --> 3	Oligodendrocyte_like_tumor	NA	Pri_Recurrence_after_TMZ	1p_19q_codeleted	CNA_Group_ 4	-5.0000230891077399E-2	4.0325427872365899E-2	G2M
A_AATGACGTAGGATGTC-1	0	KM4242_01	3	Primary	3 --> 3	Proneural_OPC_like_tumor	NA	Pri_Recurrence_after_TMZ	1p_19q_codeleted	CNA_Group_ 1	2.7740875430821801E-3	-3.6018592417516901E-3	S
A_AATGACTGTCAGCCGG-1	1	KM4242_01	3	Primary	3 --> 3	Oligodendrocyte_like_tumor	NA	Pri_Recurrence_after_TMZ	1p_19q_codeleted	CNA_Group_ 1	1.40936379065386E-2	9.5276085413474997E-3	S
A_AATGATGATACGCTAT-1	1	KM4242_01	3	Primary	3 --> 3	Oligodendrocyte_like_tumor	NA	Pri_Recurrence_after_TMZ	1p_19q_codeleted	CNA_Group_ 3	-6.3708011482388097E-2	1.8726843660011899E-2	G2M
A_AATGATGCGACTCCTG-1	0	KM4242_01	3	Primary	3 --> 3	Proneural_OPC_like_tumor	NA	Pri_Recurrence_after_TMZ	1p_19q_codeleted	CNA_Group_ 2	5.0014077873732098E-4	8.4305013313263604E-3	G2M
A_AATGCAACCGGGTACC-1	1	KM4242_01	3	Primary	3 --> 3	Oligodendrocyte_like_tumor	NA	Pri_Recurrence_after_TMZ	1p_19q_codeleted	CNA_Group_ 2	4.5456859931980301E-2	-1.8288372144381601E-2	S
A_AATGGTCCACCGTTCA-1	2	KM4242_01	3	Primary	3 --> 3	NPC_like_tumor	G3	Pri_Recurrence_after_TMZ	non_tumor	NA	1.86995477565545E-2	-6.3456673369564301E-2	S
A_AATGGTTCTCACAAGC-1	2	KM4242_01	3	Primary	3 --> 3	NPC_like_tumor	G3	Pri_Recurrence_after_TMZ	non_tumor	NA	-6.1294263573089501E-2	2.0857926780364001E-2	G2M
A_AATTAAAGGTCGGCGT-1	0	KM4242_01	3	Primary	3 --> 3	Proneural_OPC_like_tumor	G3	Pri_Recurrence_after_TMZ	1p_19q_codeleted	CNA_Group_ 1	9.6587543779814905E-2	-1.1187993367090299E-2	S
A_AATTAACGGATTTCCA-1	0	KM4242_01	3	Primary	3 --> 3	Proneural_OPC_like_tumor	G3	Pri_Recurrence_after_TMZ	1p_19q_codeleted	CNA_Group_ 2	-2.24195368280206E-2	-4.7911560258951102E-2	G1
A_AATTAGCGCTGCAGCG-1	0	KM4242_01	3	Primary	3 --> 3	Proneural_OPC_like_tumor	G3	Pri_Recurrence_after_TMZ	1p_19q_codeleted	CNA_Group_ 3	0.126602835518041	-3.1853048517162301E-2	S
A_AATTCATAAGGGATCT-1	1	KM4242_01	3	Primary	3 --> 3	Oligodendrocyte_like_tumor	NA	Pri_Recurrence_after_TMZ	1p_19q_codeleted	CNA_Group_ 3	-1.83351512963916E-2	-8.3810390399882608E-3	G1
A_AATTCGATTCGAGGAT-1	0	KM4242_01	3	Primary	3 --> 3	Proneural_OPC_like_tumor	G3	Pri_Recurrence_after_TMZ	1p_19q_codeleted	CNA_Group_ 2	4.72666998635368E-2	-9.2666091713934605E-3	S
A_AATTCTAGAGTTAGGC-1	5	KM4242_01	3	Primary	3 --> 3	NPC_like_and_DNA_damage	G3	Pri_Recurrence_after_TMZ	non_tumor	CNA_Group_ 1	8.3426243662522007E-2	-1.6269395487162101E-2	S
A_AATTGAACGCTCTGGT-1	0	KM4242_01	3	Primary	3 --> 3	Proneural_OPC_like_tumor	NA	Pri_Recurrence_after_TMZ	1p_19q_codeleted	CNA_Group_ 1	2.1287825621563599E-2	-7.2340648659558202E-3	S
A_ACAAAGCATGACCTAG-1	0	KM4242_01	3	Primary	3 --> 3	Proneural_OPC_like_tumor	NA	Pri_Recurrence_after_TMZ	1p_19q_codeleted	CNA_Group_ 1	-5.6185974324402303E-2	-1.6088846541950301E-2	G1
A_ACAAATCGCACCGAAT-1	0	KM4242_01	3	Primary	3 --> 3	Proneural_OPC_like_tumor	NA	Pri_Recurrence_after_TMZ	1p_19q_codeleted	CNA_Group_ 1	1.7860497407044301E-2	-2.6345107056445601E-2	S
A_ACAAATGGTAGTGTTT-1	1	KM4242_01	3	Primary	3 --> 3	Oligodendrocyte_like_tumor	NA	Pri_Recurrence_after_TMZ	1p_19q_codeleted	CNA_Group_ 3	2.7239366068813999E-3	-3.1342550037947198E-2	S
A_ACAACAGCATGAGCTA-1	1	KM4242_01	3	Primary	3 --> 3	Oligodendrocyte_like_tumor	NA	Pri_Recurrence_after_TMZ	1p_19q_codeleted	CNA_Group_ 3	-7.6289954250521198E-3	-1.16933051281462E-2	G1
A_ACAACGGTCCCTGCGA-1	0	KM4242_01	3	Primary	3 --> 3	Proneural_OPC_like_tumor	G3	Pri_Recurrence_after_TMZ	1p_19q_codeleted	CNA_Group_ 3	-1.9206081869763799E-2	3.14825559158559E-2	G2M
A_ACAAGCAGTGCCTAGC-1	0	KM4242_01	3	Primary	3 --> 3	Proneural_OPC_like_tumor	G3	Pri_Recurrence_after_TMZ	1p_19q_codeleted	CNA_Group_ 1	7.3399842983166699E-3	-2.3671103045953198E-2	S
A_ACAAGGAAATCCGCCC-1	6	KM4242_01	3	Primary	3 --> 3	IEG	G3	Pri_Recurrence_after_TMZ	1p_19q_codeleted	CNA_Group_ 1	1.78161397893647E-2	-5.2659270699789901E-2	S
A_ACAAGGACAAGAGGTT-1	0	KM4242_01	3	Primary	3 --> 3	Proneural_OPC_like_tumor	G3	Pri_Recurrence_after_TMZ	1p_19q_codeleted	CNA_Group_ 1	0.110383501349002	0.14738862532327199	G2M
A_ACAAGGATGCTTTAGG-1	0	KM4242_01	3	Primary	3 --> 3	Proneural_OPC_like_tumor	G3	Pri_Recurrence_after_TMZ	1p_19q_codeleted	CNA_Group_ 1	8.4120693168996299E-2	-2.1564164279331201E-2	S
A_ACAAGGGCAGGCTCTG-1	0	KM4242_01	3	Primary	3 --> 3	Proneural_OPC_like_tumor	NA	Pri_Recurrence_after_TMZ	1p_19q_codeleted	CNA_Group_ 1	-2.5805912924194999E-2	-5.2046831067315003E-2	G1
A_ACAATCCATTTAAACC-1	0	KM4242_01	3	Primary	3 --> 3	Proneural_OPC_like_tumor	G3	Pri_Recurrence_after_TMZ	1p_19q_codeleted	CNA_Group_ 1	5.3848677507695099E-2	-3.2200031993244602E-2	S
A_ACAATTTGAGCAGTGG-1	1	KM4242_01	3	Primary	3 --> 3	Oligodendrocyte_like_tumor	NA	Pri_Recurrence_after_TMZ	1p_19q_codeleted	CNA_Group_ 3	4.1084691723712298E-2	9.5740369865939708E-3	S
A_ACACAAAGACGGGTGG-1	1	KM4242_01	3	Primary	3 --> 3	Oligodendrocyte_like_tumor	NA	Pri_Recurrence_after_TMZ	1p_19q_codeleted	CNA_Group_ 3	3.8695288635088199E-2	5.1364935666792198E-2	G2M
A_ACACACCAGGACCAGT-1	1	KM4242_01	3	Primary	3 --> 3	Oligodendrocyte_like_tumor	NA	Pri_Recurrence_after_TMZ	1p_19q_codeleted	CNA_Group_ 4	7.8210470656704008E-3	-3.5686064251232198E-2	S
A_ACACACTTTCTACACG-1	1	KM4242_01	3	Primary	3 --> 3	Oligodendrocyte_like_tumor	NA	Pri_Recurrence_after_TMZ	1p_19q_codeleted	CNA_Group_ 3	-2.0070745669905399E-2	-4.5463838745541697E-2	G1
A_ACACCCAGCATGCAGC-1	7	KM4242_01	3	Primary	3 --> 3	Cortical_neurons_and_tumor_cells	Cortical_neurons_and_tumor_cells	Pri_Recurrence_after_TMZ	1p_19q_codeleted	CNA_Group_ 1	6.6336815888976303E-2	-4.0246534921285097E-2	S
A_ACACCCGAGAAATCCG-1	0	KM4242_01	3	Primary	3 --> 3	Proneural_OPC_like_tumor	G3	Pri_Recurrence_after_TMZ	1p_19q_codeleted	CNA_Group_ 1	-2.4479427059015499E-2	-6.0147188242529799E-2	G1
A_ACACCTTAAGTAGGGC-1	4	KM4242_01	3	Primary	3 --> 3	Pericyte_Endothelial	Pericyte_Endothelial	Pri_Recurrence_after_TMZ	1p_19q_codeleted	CNA_Group_ 1	6.8231625368721405E-2	-1.67634217173879E-3	S
A_ACACGAGACTCCTTCT-1	1	KM4242_01	3	Primary	3 --> 3	Oligodendrocyte_like_tumor	NA	Pri_Recurrence_after_TMZ	1p_19q_codeleted	CNA_Group_ 3	-4.7766165496995201E-2	-1.0572890961789301E-2	G1
A_ACACGGGAACTTAGGG-1	1	KM4242_01	3	Primary	3 --> 3	Oligodendrocyte_like_tumor	NA	Pri_Recurrence_after_TMZ	1p_19q_codeleted	CNA_Group_ 3	-2.8635829600582199E-3	4.69601235275987E-2	G2M
A_ACACTGATCAAGGTGT-1	0	KM4242_01	3	Primary	3 --> 3	Proneural_OPC_like_tumor	G3	Pri_Recurrence_after_TMZ	1p_19q_codeleted	CNA_Group_ 1	5.5722451709141099E-2	-6.0823618378481603E-2	S
A_ACAGGCTTGCCCGACT-1	4	KM4242_01	3	Primary	3 --> 3	Pericyte_Endothelial	Pericyte_Endothelial	Pri_Recurrence_after_TMZ	1p_19q_codeleted	CNA_Group_ 1	3.87704605296934E-2	-6.9576440618975798E-3	S
A_ACATAATAAGGCGGTG-1	1	KM4242_01	3	Primary	3 --> 3	Oligodendrocyte_like_tumor	NA	Pri_Recurrence_after_TMZ	1p_19q_codeleted	CNA_Group_ 2	-2.02611585187683E-2	3.0351620179500501E-2	G2M
A_ACATCAGCTGGGACGC-1	4	KM4242_01	3	Primary	3 --> 3	Pericyte_Endothelial	Pericyte_Endothelial	Pri_Recurrence_after_TMZ	1p_19q_codeleted	CNA_Group_ 2	-2.8533979434929101E-2	-1.9232382804918801E-2	G1
A_ACATCCCGGCCATACG-1	0	KM4242_01	3	Primary	3 --> 3	Proneural_OPC_like_tumor	G3	Pri_Recurrence_after_TMZ	1p_19q_codeleted	CNA_Group_ 2	2.9795524944009E-2	-8.0861647034322103E-4	S
A_ACATCGATCGTTTACC-1	0	KM4242_01	3	Primary	3 --> 3	Proneural_OPC_like_tumor	G3	Pri_Recurrence_after_TMZ	1p_19q_codeleted	CNA_Group_ 1	2.1002987676551E-2	1.1629890143879501E-2	S
A_ACATCGGTCAGCCGCG-1	0	KM4242_01	3	Primary	3 --> 3	Proneural_OPC_like_tumor	G3	Pri_Recurrence_after_TMZ	1p_19q_codeleted	CNA_Group_ 1	3.4394275473831099E-3	-4.3770763195870102E-2	S
A_ACATCGTATGCAATGG-1	0	KM4242_01	3	Primary	3 --> 3	Proneural_OPC_like_tumor	NA	Pri_Recurrence_after_TMZ	1p_19q_codeleted	CNA_Group_ 1	-2.9508982378558798E-2	5.2320103242987403E-3	G2M
A_ACATTAGTTTATATCC-1	0	KM4242_01	3	Primary	3 --> 3	Proneural_OPC_like_tumor	G3	Pri_Recurrence_after_TMZ	1p_19q_codeleted	CNA_Group_ 1	1.3999110697701199E-2	7.1619751821976094E-2	G2M
A_ACCAACCGCACTCCAC-1	0	KM4242_01	3	Primary	3 --> 3	Proneural_OPC_like_tumor	NA	Pri_Recurrence_after_TMZ	1p_19q_codeleted	CNA_Group_ 1	2.4600715942928099E-2	4.0798330254987698E-2	G2M
A_ACCAACGCTTATTTAT-1	0	KM4242_01	3	Primary	3 --> 3	Proneural_OPC_like_tumor	G3	Pri_Recurrence_after_TMZ	1p_19q_codeleted	CNA_Group_ 1	-6.56688625162841E-3	2.9650176700019501E-2	G2M
A_ACCAAGAACGCGTGTC-1	1	KM4242_01	3	Primary	3 --> 3	Oligodendrocyte_like_tumor	NA	Pri_Recurrence_after_TMZ	1p_19q_codeleted	CNA_Group_ 3	4.8326103406391097E-2	1.00800425711031E-2	S
A_ACCAATATGCAAGTTA-1	4	KM4242_01	3	Primary	3 --> 3	Pericyte_Endothelial	Pericyte_Endothelial	Pri_Recurrence_after_TMZ	1p_19q_codeleted	CNA_Group_ 1	3.20679341911497E-2	1.22769803136585E-2	S
A_ACCACAAGTTTCTATC-1	0	KM4242_01	3	Primary	3 --> 3	Proneural_OPC_like_tumor	G3	Pri_Recurrence_after_TMZ	1p_19q_codeleted	CNA_Group_ 1	1.7208598630809799E-2	1.09586855648069E-2	S
A_ACCACGTGCAGCTATA-1	6	KM4242_01	3	Primary	3 --> 3	IEG	G3	Pri_Recurrence_after_TMZ	1p_19q_codeleted	CNA_Group_ 1	0.10281129459985799	6.2258679566452403E-2	S
A_ACCATATCCGCAATAA-1	0	KM4242_01	3	Primary	3 --> 3	Proneural_OPC_like_tumor	G3	Pri_Recurrence_after_TMZ	1p_19q_codeleted	CNA_Group_ 1	1.9888501070676801E-2	1.2440294332171999E-2	S
A_ACCATCGTATATGGTA-1	0	KM4242_01	3	Primary	3 --> 3	Proneural_OPC_like_tumor	G3	Pri_Recurrence_after_TMZ	1p_19q_codeleted	CNA_Group_ 1	1.98437625722747e-05	-3.2389114928053103E-2	S
A_ACCCAACGCCCGTGGC-1	1	KM4242_01	3	Primary	3 --> 3	Oligodendrocyte_like_tumor	NA	Pri_Recurrence_after_TMZ	1p_19q_codeleted	CNA_Group_ 3	-2.3000470915505E-2	-3.4596888657583001E-2	G1
A_ACCCACCTACATGCTC-1	2	KM4242_01	3	Primary	3 --> 3	NPC_like_tumor	G3	Pri_Recurrence_after_TMZ	non_tumor	NA	-6.2583674731613401E-2	2.9800296849420801E-2	G2M
A_ACCCATCTTGAGGGTA-1	0	KM4242_01	3	Primary	3 --> 3	Proneural_OPC_like_tumor	G3	Pri_Recurrence_after_TMZ	1p_19q_codeleted	CNA_Group_ 1	0.136150812100921	1.94999105052065E-2	S
A_ACCCGGAAACTCCCAG-1	0	KM4242_01	3	Primary	3 --> 3	Proneural_OPC_like_tumor	G3	Pri_Recurrence_after_TMZ	1p_19q_codeleted	CNA_Group_ 2	-1.03898574521762E-2	1.2209218470478501E-2	G2M
A_ACCCGGTTACACTTCC-1	0	KM4242_01	3	Primary	3 --> 3	Proneural_OPC_like_tumor	G3	Pri_Recurrence_after_TMZ	1p_19q_codeleted	CNA_Group_ 1	3.9233545068959902E-2	2.1349144032935401E-2	S
A_ACCCGTGTCATCAGTA-1	0	KM4242_01	3	Primary	3 --> 3	Proneural_OPC_like_tumor	G3	Pri_Recurrence_after_TMZ	1p_19q_codeleted	CNA_Group_ 2	-5.7029464778225597E-2	4.5751817061405402E-2	G2M
A_ACCCTCCCTTGCTATT-1	4	KM4242_01	3	Primary	3 --> 3	Pericyte_Endothelial	Pericyte_Endothelial	Pri_Recurrence_after_TMZ	1p_19q_codeleted	CNA_Group_ 1	-8.5539668455431699E-3	-1.7619236653539101E-2	G1
A_ACCGACACATCTCCCA-1	0	KM4242_01	3	Primary	3 --> 3	Proneural_OPC_like_tumor	G3	Pri_Recurrence_after_TMZ	1p_19q_codeleted	CNA_Group_ 1	-3.9392886924204798E-2	8.2519177068148004E-3	G2M
A_ACCGACTGAGTCCCAC-1	1	KM4242_01	3	Primary	3 --> 3	Oligodendrocyte_like_tumor	NA	Pri_Recurrence_after_TMZ	1p_19q_codeleted	CNA_Group_ 3	6.3032717289299697E-2	7.2377959529715298E-3	S
A_ACCGAGTCTCCTTATT-1	0	KM4242_01	3	Primary	3 --> 3	Proneural_OPC_like_tumor	G3	Pri_Recurrence_after_TMZ	1p_19q_codeleted	CNA_Group_ 1	4.72766098357058E-2	-3.5349082416628597E-2	S
A_ACCGATGGTAGCATCG-1	3	KM4242_01	3	Primary	3 --> 3	RBCs	RBCs	Pri_Recurrence_after_TMZ	1p_19q_codeleted	CNA_Group_ 2	2.0834850062861399E-2	5.5304313599449803E-2	G2M
A_ACCGCAATAACTGCCT-1	6	KM4242_01	3	Primary	3 --> 3	IEG	G3	Pri_Recurrence_after_TMZ	1p_19q_codeleted	CNA_Group_ 1	8.4837452927227205E-2	-1.9919570470095199E-3	S
A_ACCTAATCGACTTCCT-1	5	KM4242_01	3	Primary	3 --> 3	NPC_like_and_DNA_damage	G3	Pri_Recurrence_after_TMZ	1p_19q_codeleted	CNA_Group_ 1	-4.8425641787477103E-2	1.1371773359993601E-2	G2M
A_ACGAAATGGGCGGCAC-1	0	KM4242_01	3	Primary	3 --> 3	Proneural_OPC_like_tumor	G3	Pri_Recurrence_after_TMZ	1p_19q_codeleted	CNA_Group_ 3	6.0194455509828004E-4	-6.0661084000561097E-2	S
A_ACGAGGATACCACTCT-1	0	KM4242_01	3	Primary	3 --> 3	Proneural_OPC_like_tumor	G3	Pri_Recurrence_after_TMZ	1p_19q_codeleted	CNA_Group_ 2	-2.7744060182423699E-3	-2.1299479939345799E-2	G1
A_ACGATACATAGAACTA-1	1	KM4242_01	3	Primary	3 --> 3	Oligodendrocyte_like_tumor	NA	Pri_Recurrence_after_TMZ	1p_19q_codeleted	CNA_Group_ 2	-2.9630702994965501E-2	4.6556792711079598E-2	G2M
A_ACGATCATACATAGAG-1	1	KM4242_01	3	Primary	3 --> 3	Oligodendrocyte_like_tumor	NA	Pri_Recurrence_after_TMZ	1p_19q_codeleted	CNA_Group_ 3	-3.82484652042425E-2	-2.17003770747973E-2	G1
A_ACGATGCATATGTTAT-1	0	KM4242_01	3	Primary	3 --> 3	Proneural_OPC_like_tumor	G3	Pri_Recurrence_after_TMZ	1p_19q_codeleted	CNA_Group_ 1	3.9412048393319098E-2	-2.4296269250067701E-2	S
A_ACGCATTCGTGAGTAC-1	4	KM4242_01	3	Primary	3 --> 3	Pericyte_Endothelial	Pericyte_Endothelial	Pri_Recurrence_after_TMZ	1p_19q_codeleted	CNA_Group_ 3	1.49564652074093E-2	-1.0392594080859701E-2	S
A_ACGCCAGATGATTTCT-1	3	KM4242_01	3	Primary	3 --> 3	RBCs	RBCs	Pri_Recurrence_after_TMZ	1p_19q_codeleted	CNA_Group_ 1	2.4978058839316801E-2	-1.2326321398658399E-2	S
A_ACGCCGCTAGACGACC-1	0	KM4242_01	3	Primary	3 --> 3	Proneural_OPC_like_tumor	G3	Pri_Recurrence_after_TMZ	1p_19q_codeleted	CNA_Group_ 1	0.124353748880965	-2.28767083510172E-2	S
A_ACGCGAAGTCAGACGA-1	0	KM4242_01	3	Primary	3 --> 3	Proneural_OPC_like_tumor	G3	Pri_Recurrence_after_TMZ	1p_19q_codeleted	CNA_Group_ 1	0.12972846804528301	-5.2025548719273097E-2	S
A_ACGCGCTACACAGGGT-1	2	KM4242_01	3	Primary	3 --> 3	NPC_like_tumor	G3	Pri_Recurrence_after_TMZ	non_tumor	NA	0.110400557102924	-7.1519740089054595E-2	S
A_ACGCGGGCCAAGGACA-1	4	KM4242_01	3	Primary	3 --> 3	Pericyte_Endothelial	Pericyte_Endothelial	Pri_Recurrence_after_TMZ	1p_19q_codeleted	CNA_Group_ 1	-3.92566293466051E-2	-2.16197011063641E-2	G1
A_ACGGACTCTCAAAGCG-1	0	KM4242_01	3	Primary	3 --> 3	Proneural_OPC_like_tumor	G3	Pri_Recurrence_after_TMZ	1p_19q_codeleted	CNA_Group_ 2	1.36036895660962E-2	-5.2103240201998899E-2	S
A_ACGGATGGTGCGGATA-1	6	KM4242_01	3	Primary	3 --> 3	IEG	G3	Pri_Recurrence_after_TMZ	1p_19q_codeleted	CNA_Group_ 1	1.75681725134046E-2	-3.4695271739934301E-2	S
A_ACGGCACTTGCTTGGG-1	0	KM4242_01	3	Primary	3 --> 3	Proneural_OPC_like_tumor	G3	Pri_Recurrence_after_TMZ	1p_19q_codeleted	CNA_Group_ 1	1.48705324687061E-3	-1.8097332078197199E-2	S
A_ACGGCCAACATGGACT-1	0	KM4242_01	3	Primary	3 --> 3	Proneural_OPC_like_tumor	G3	Pri_Recurrence_after_TMZ	1p_19q_codeleted	CNA_Group_ 1	7.4934176517950299E-2	4.0522702925071701E-2	S
A_ACGGCGACGATGGGAA-1	0	KM4242_01	3	Primary	3 --> 3	Proneural_OPC_like_tumor	G3	Pri_Recurrence_after_TMZ	1p_19q_codeleted	CNA_Group_ 1	5.8549605133860101E-2	-1.9301142692703999E-2	S
A_ACGTAGATTGCTGATG-1	0	KM4242_01	3	Primary	3 --> 3	Proneural_OPC_like_tumor	NA	Pri_Recurrence_after_TMZ	1p_19q_codeleted	CNA_Group_ 1	-5.7838951201354599E-2	-5.6573805343331498E-3	G1
A_ACGTGCGCCTCGTGCA-1	1	KM4242_01	3	Primary	3 --> 3	Oligodendrocyte_like_tumor	NA	Pri_Recurrence_after_TMZ	1p_19q_codeleted	CNA_Group_ 3	-1.2148283597758901E-2	-3.1918912528768197E-2	G1
A_ACGTTAATGTCGAAGA-1	0	KM4242_01	3	Primary	3 --> 3	Proneural_OPC_like_tumor	NA	Pri_Recurrence_after_TMZ	1p_19q_codeleted	CNA_Group_ 1	1.21770922000792E-2	-3.78400473525176E-2	S
A_ACGTTAGATTTGCCCG-1	0	KM4242_01	3	Primary	3 --> 3	Proneural_OPC_like_tumor	G3	Pri_Recurrence_after_TMZ	1p_19q_codeleted	CNA_Group_ 1	4.7952404976363001E-2	-1.55755650793463E-2	S
A_ACGTTTAGTTGTGATC-1	1	KM4242_01	3	Primary	3 --> 3	Oligodendrocyte_like_tumor	NA	Pri_Recurrence_after_TMZ	1p_19q_codeleted	CNA_Group_ 2	-2.4184893385334701E-2	1.02041289977437E-2	G2M
A_ACTACCAGCTCTCTGG-1	0	KM4242_01	3	Primary	3 --> 3	Proneural_OPC_like_tumor	G3	Pri_Recurrence_after_TMZ	1p_19q_codeleted	CNA_Group_ 3	0.128803981036375	-2.7557947548756002E-3	S
A_ACTACGCGTTAGAATT-1	0	KM4242_01	3	Primary	3 --> 3	Proneural_OPC_like_tumor	G3	Pri_Recurrence_after_TMZ	1p_19q_codeleted	CNA_Group_ 2	-1.30070171378806E-2	8.8697485569576E-3	G2M
A_ACTATTCGTCCGTGGT-1	0	KM4242_01	3	Primary	3 --> 3	Proneural_OPC_like_tumor	NA	Pri_Recurrence_after_TMZ	1p_19q_codeleted	CNA_Group_ 2	-1.4412051113527999E-3	-3.3176796258686803E-2	G1
A_ACTCAAGTGCAAGGCT-1	6	KM4242_01	3	Primary	3 --> 3	IEG	G3	Pri_Recurrence_after_TMZ	1p_19q_codeleted	CNA_Group_ 1	5.5696508276571702E-2	-2.1610196628222399E-2	S
A_ACTCAATAAAGGCACG-1	1	KM4242_01	3	Primary	3 --> 3	Oligodendrocyte_like_tumor	NA	Pri_Recurrence_after_TMZ	1p_19q_codeleted	CNA_Group_ 2	-5.7414982093389799E-2	4.1515659479350903E-2	G2M
A_ACTCCCTAATGCTAAA-1	0	KM4242_01	3	Primary	3 --> 3	Proneural_OPC_like_tumor	G3	Pri_Recurrence_after_TMZ	1p_19q_codeleted	CNA_Group_ 1	6.36010409038653E-2	4.3466069509941398E-2	S
A_ACTCCCTAGAATAGTA-1	0	KM4242_01	3	Primary	3 --> 3	Proneural_OPC_like_tumor	G3	Pri_Recurrence_after_TMZ	1p_19q_codeleted	CNA_Group_ 1	3.7259905703111502E-2	-4.84886782221697E-2	S
A_ACTCCGGCCGACCACT-1	0	KM4242_01	3	Primary	3 --> 3	Proneural_OPC_like_tumor	G3	Pri_Recurrence_after_TMZ	1p_19q_codeleted	CNA_Group_ 1	3.3603157476843497E-2	1.60904338176663E-2	S
A_ACTCGTCAGTAATCCC-1	1	KM4242_01	3	Primary	3 --> 3	Oligodendrocyte_like_tumor	NA	Pri_Recurrence_after_TMZ	1p_19q_codeleted	CNA_Group_ 1	-2.15763102524834E-3	-1.92777393421859E-2	G1
A_ACTCTCTGACTTAGGT-1	0	KM4242_01	3	Primary	3 --> 3	Proneural_OPC_like_tumor	NA	Pri_Recurrence_after_TMZ	1p_19q_codeleted	CNA_Group_ 3	1.46450015363691E-2	-1.5252681568823E-2	S
A_ACTCTTGTATAGTAAC-1	0	KM4242_01	3	Primary	3 --> 3	Proneural_OPC_like_tumor	NA	Pri_Recurrence_after_TMZ	1p_19q_codeleted	CNA_Group_ 1	0.115922252054804	1.1714452241489801E-2	S
A_ACTGAATGGCGAAAGT-1	4	KM4242_01	3	Primary	3 --> 3	Pericyte_Endothelial	Pericyte_Endothelial	Pri_Recurrence_after_TMZ	1p_19q_codeleted	CNA_Group_ 1	-6.1863951774571303E-2	-6.8669877619012595E-2	G1
A_ACTGCCGTCGTAACTC-1	1	KM4242_01	3	Primary	3 --> 3	Oligodendrocyte_like_tumor	NA	Pri_Recurrence_after_TMZ	1p_19q_codeleted	CNA_Group_ 2	-1.6407463158196701E-4	-2.0686548689348501E-2	G1
A_ACTGTACGATACACAT-1	1	KM4242_01	3	Primary	3 --> 3	Oligodendrocyte_like_tumor	NA	Pri_Recurrence_after_TMZ	1p_19q_codeleted	CNA_Group_ 2	-4.3266590267632798E-2	1.6013214305402399E-2	G2M
A_ACTGTAGCACTTTGGA-1	5	KM4242_01	3	Primary	3 --> 3	NPC_like_and_DNA_damage	G3	Pri_Recurrence_after_TMZ	1p_19q_codeleted	CNA_Group_ 1	-5.2211508153092299E-2	-2.7277725181979501E-3	G1
A_ACTGTCCAGGATTATA-1	0	KM4242_01	3	Primary	3 --> 3	Proneural_OPC_like_tumor	G3	Pri_Recurrence_after_TMZ	1p_19q_codeleted	CNA_Group_ 1	2.62311425751891E-2	6.1172636981027699E-2	G2M
A_ACTGTCTTCTTTAGAA-1	0	KM4242_01	3	Primary	3 --> 3	Proneural_OPC_like_tumor	NA	Pri_Recurrence_after_TMZ	1p_19q_codeleted	CNA_Group_ 1	5.5096585978934902E-2	-3.4923117051980299E-2	S
A_ACTTACGCATCCACGC-1	0	KM4242_01	3	Primary	3 --> 3	Proneural_OPC_like_tumor	G3	Pri_Recurrence_after_TMZ	1p_19q_codeleted	CNA_Group_ 1	8.7680629230904195E-2	7.2417036133016104E-3	S
A_ACTTATACTTACCCGG-1	1	KM4242_01	3	Primary	3 --> 3	Oligodendrocyte_like_tumor	NA	Pri_Recurrence_after_TMZ	1p_19q_codeleted	CNA_Group_ 3	-1.6468547499611901E-2	6.2900285859969502E-3	G2M
A_ACTTATTAGGATCGGT-1	0	KM4242_01	3	Primary	3 --> 3	Proneural_OPC_like_tumor	G3	Pri_Recurrence_after_TMZ	1p_19q_codeleted	CNA_Group_ 1	5.2521900673109502E-2	3.9884133812506703E-2	S
A_ACTTCAGGCTGATCCC-1	6	KM4242_01	3	Primary	3 --> 3	IEG	NA	Pri_Recurrence_after_TMZ	1p_19q_codeleted	CNA_Group_ 1	6.2372564861087901E-2	5.2782230258755697E-2	S
A_ACTTCCATGCGGGACA-1	6	KM4242_01	3	Primary	3 --> 3	IEG	G3	Pri_Recurrence_after_TMZ	1p_19q_codeleted	CNA_Group_ 1	6.1836564521883998E-2	-1.79314244486991E-2	S
A_ACTTCGCCATACGCAC-1	1	KM4242_01	3	Primary	3 --> 3	Oligodendrocyte_like_tumor	NA	Pri_Recurrence_after_TMZ	1p_19q_codeleted	CNA_Group_ 3	6.0154670619881001E-2	-1.9624200347029101E-2	S
A_ACTTGACTCCCTCTTT-1	0	KM4242_01	3	Primary	3 --> 3	Proneural_OPC_like_tumor	NA	Pri_Recurrence_after_TMZ	1p_19q_codeleted	CNA_Group_ 1	-2.4202775844234799E-2	-1.1463278118936999E-2	G1
A_ACTTGGGACCCGGTGG-1	0	KM4242_01	3	Primary	3 --> 3	Proneural_OPC_like_tumor	G3	Pri_Recurrence_after_TMZ	1p_19q_codeleted	CNA_Group_ 1	0.111993837882256	9.1727589917297604E-3	S
A_ACTTTCCTATAGCTTC-1	0	KM4242_01	3	Primary	3 --> 3	Proneural_OPC_like_tumor	NA	Pri_Recurrence_after_TMZ	1p_19q_codeleted	CNA_Group_ 2	1.3475958906564301E-2	-5.96134751200545E-2	S
A_AGAACGTGGTACATTC-1	1	KM4242_01	3	Primary	3 --> 3	Oligodendrocyte_like_tumor	NA	Pri_Recurrence_after_TMZ	1p_19q_codeleted	CNA_Group_ 3	5.2401973493272302E-2	3.7911507907542101E-2	S
A_AGAAGAGCGCCGTTCC-1	1	KM4242_01	3	Primary	3 --> 3	Oligodendrocyte_like_tumor	NA	Pri_Recurrence_after_TMZ	NA	NA	-2.61376542227367E-2	3.6553668188852799E-2	G2M
A_AGAAGGTTGCCGAATT-1	0	KM4242_01	3	Primary	3 --> 3	Proneural_OPC_like_tumor	G3	Pri_Recurrence_after_TMZ	1p_19q_codeleted	CNA_Group_ 1	6.2406336181096402E-2	8.5187491730997992E-3	S
A_AGAAGGTTGTAGGTCG-1	0	KM4242_01	3	Primary	3 --> 3	Proneural_OPC_like_tumor	G3	Pri_Recurrence_after_TMZ	1p_19q_codeleted	CNA_Group_ 1	8.9567969478230897E-2	2.1321256205003698E-2	S
A_AGAATAAATCTTCAGG-1	0	KM4242_01	3	Primary	3 --> 3	Proneural_OPC_like_tumor	G3	Pri_Recurrence_after_TMZ	1p_19q_codeleted	CNA_Group_ 1	-1.7890752089355699E-2	1.8233272284527799E-2	G2M
A_AGACCATGGGATACAA-1	0	KM4242_01	3	Primary	3 --> 3	Proneural_OPC_like_tumor	G3	Pri_Recurrence_after_TMZ	1p_19q_codeleted	CNA_Group_ 1	-1.4000644319050201E-2	-3.6642384728963903E-2	G1
A_AGACCCACCGCTGATC-1	0	KM4242_01	3	Primary	3 --> 3	Proneural_OPC_like_tumor	G3	Pri_Recurrence_after_TMZ	1p_19q_codeleted	CNA_Group_ 2	1.4355501773521399E-2	5.4246289452406303E-2	G2M
A_AGACCCGCCCTCCTCG-1	7	KM4242_01	3	Primary	3 --> 3	Cortical_neurons_and_tumor_cells	Cortical_neurons_and_tumor_cells	Pri_Recurrence_after_TMZ	1p_19q_codeleted	CNA_Group_ 3	-1.8927485699524099E-2	-1.5678869035212602E-2	G1
A_AGACTAGCCTTCCAGA-1	0	KM4242_01	3	Primary	3 --> 3	Proneural_OPC_like_tumor	G3	Pri_Recurrence_after_TMZ	1p_19q_codeleted	CNA_Group_ 4	6.2652663686263196E-2	-1.08436314250661E-2	S
A_AGAGAACCGTCTAGGA-1	4	KM4242_01	3	Primary	3 --> 3	Pericyte_Endothelial	Pericyte_Endothelial	Pri_Recurrence_after_TMZ	1p_19q_codeleted	CNA_Group_ 3	-3.9519611651841202E-2	2.0682823820866399E-2	G2M
A_AGAGATCTCTAAAGCG-1	0	KM4242_01	3	Primary	3 --> 3	Proneural_OPC_like_tumor	G3	Pri_Recurrence_after_TMZ	1p_19q_codeleted	CNA_Group_ 1	8.8248312675964696E-2	-6.4088005114684807E-2	S
A_AGAGCAGTTATGAGAC-1	0	KM4242_01	3	Primary	3 --> 3	Proneural_OPC_like_tumor	G3	Pri_Recurrence_after_TMZ	1p_19q_codeleted	CNA_Group_ 1	1.42847330488596E-2	-4.3706527144983499E-2	S
A_AGAGCGGGCTAATCAT-1	1	KM4242_01	3	Primary	3 --> 3	Oligodendrocyte_like_tumor	NA	Pri_Recurrence_after_TMZ	1p_19q_codeleted	CNA_Group_ 3	2.4731761321525599E-2	9.2789550964278694E-3	S
A_AGAGCGTACAAGCTCG-1	4	KM4242_01	3	Primary	3 --> 3	Pericyte_Endothelial	Pericyte_Endothelial	Pri_Recurrence_after_TMZ	1p_19q_codeleted	CNA_Group_ 2	5.2823667851612299E-2	-9.4810424348794903E-3	S
A_AGATAACTTCAGGGCC-1	4	KM4242_01	3	Primary	3 --> 3	Pericyte_Endothelial	Pericyte_Endothelial	Pri_Recurrence_after_TMZ	1p_19q_codeleted	CNA_Group_ 1	4.8468860380746902E-2	4.5161247621286498E-4	S
A_AGATACCGGTGTTCAC-1	4	KM4242_01	3	Primary	3 --> 3	Pericyte_Endothelial	Pericyte_Endothelial	Pri_Recurrence_after_TMZ	1p_19q_codeleted	CNA_Group_ 1	6.9050752534685303E-2	-2.4365672071376299E-2	S
A_AGATACTCAAGATCGA-1	4	KM4242_01	3	Primary	3 --> 3	Pericyte_Endothelial	Pericyte_Endothelial	Pri_Recurrence_after_TMZ	1p_19q_codeleted	CNA_Group_ 3	7.0570851530347804E-3	-3.26215707281396E-2	S
A_AGATATAATACGACTA-1	0	KM4242_01	3	Primary	3 --> 3	Proneural_OPC_like_tumor	G3	Pri_Recurrence_after_TMZ	1p_19q_codeleted	CNA_Group_ 2	1.4120593426731901E-2	-8.9486864045814907E-3	S
A_AGATCTCAGGTGTGAT-1	1	KM4242_01	3	Primary	3 --> 3	Oligodendrocyte_like_tumor	NA	Pri_Recurrence_after_TMZ	1p_19q_codeleted	CNA_Group_ 2	8.8073082925756094E-2	-1.06431388825065E-2	S
A_AGATGACTCGCCCACG-1	4	KM4242_01	3	Primary	3 --> 3	Pericyte_Endothelial	Pericyte_Endothelial	Pri_Recurrence_after_TMZ	1p_19q_codeleted	CNA_Group_ 2	-5.7075995032842303E-2	4.6611206273063401E-3	G2M
A_AGATTATAGGACGTTT-1	0	KM4242_01	3	Primary	3 --> 3	Proneural_OPC_like_tumor	G3	Pri_Recurrence_after_TMZ	1p_19q_codeleted	CNA_Group_ 1	1.3176769758548999E-2	2.3063440072637002E-2	G2M
A_AGCAAAGGCCGCTAGT-1	0	KM4242_01	3	Primary	3 --> 3	Proneural_OPC_like_tumor	G3	Pri_Recurrence_after_TMZ	1p_19q_codeleted	CNA_Group_ 2	-4.0065295220484402E-2	1.5580626984509899E-2	G2M
A_AGCACCAGTACTCACG-1	1	KM4242_01	3	Primary	3 --> 3	Oligodendrocyte_like_tumor	NA	Pri_Recurrence_after_TMZ	1p_19q_codeleted	CNA_Group_ 2	-4.9102789203594101E-2	-2.8973874575789101E-2	G1
A_AGCACTACCGGCCTGT-1	0	KM4242_01	3	Primary	3 --> 3	Proneural_OPC_like_tumor	G3	Pri_Recurrence_after_TMZ	1p_19q_codeleted	CNA_Group_ 3	-5.7664350099370001E-2	-3.28323539420972E-2	G1
A_AGCACTACCTCACCAG-1	6	KM4242_01	3	Primary	3 --> 3	IEG	G3	Pri_Recurrence_after_TMZ	1p_19q_codeleted	CNA_Group_ 1	4.6349950189861003E-2	-3.3987032001394399E-2	S
A_AGCACTTAAGGACGCC-1	2	KM4242_01	3	Primary	3 --> 3	NPC_like_tumor	G3	Pri_Recurrence_after_TMZ	non_tumor	NA	4.0303062722198101E-2	-5.2586320808861699E-2	S
A_AGCAGAAGGAGAAAGA-1	0	KM4242_01	3	Primary	3 --> 3	Proneural_OPC_like_tumor	G3	Pri_Recurrence_after_TMZ	1p_19q_codeleted	CNA_Group_ 2	-2.5414218824803599E-2	-1.19032644896062E-2	G1
A_AGCAGCCAGATGAATA-1	0	KM4242_01	3	Primary	3 --> 3	Proneural_OPC_like_tumor	G3	Pri_Recurrence_after_TMZ	1p_19q_codeleted	CNA_Group_ 2	-2.6871566443505898E-3	-3.3293148150267002E-2	G1
A_AGCATCGTCGATAATT-1	0	KM4242_01	3	Primary	3 --> 3	Proneural_OPC_like_tumor	NA	Pri_Recurrence_after_TMZ	1p_19q_codeleted	CNA_Group_ 3	-5.3404440138996303E-3	-1.29409699327205E-2	G1
A_AGCCAAGCTTTGTGTC-1	0	KM4242_01	3	Primary	3 --> 3	Proneural_OPC_like_tumor	G3	Pri_Recurrence_after_TMZ	1p_19q_codeleted	CNA_Group_ 1	0.115494550522767	4.7820704535334803E-2	S
A_AGCCACAGGTTACCCG-1	0	KM4242_01	3	Primary	3 --> 3	Proneural_OPC_like_tumor	G3	Pri_Recurrence_after_TMZ	1p_19q_codeleted	CNA_Group_ 1	4.1193688797638503E-2	3.1311562137956203E-2	S
A_AGCCACTCCCGTGCTT-1	1	KM4242_01	3	Primary	3 --> 3	Oligodendrocyte_like_tumor	NA	Pri_Recurrence_after_TMZ	1p_19q_codeleted	CNA_Group_ 3	-6.0441827289710696E-3	1.3938594246394501E-2	G2M
A_AGCCCATACATGTAAG-1	0	KM4242_01	3	Primary	3 --> 3	Proneural_OPC_like_tumor	G3	Pri_Recurrence_after_TMZ	1p_19q_codeleted	CNA_Group_ 1	2.4549960015271498E-2	8.8683777724244198E-2	G2M
A_AGCCCTAAGCGAAGTT-1	1	KM4242_01	3	Primary	3 --> 3	Oligodendrocyte_like_tumor	NA	Pri_Recurrence_after_TMZ	1p_19q_codeleted	CNA_Group_ 2	-3.3427296328079502E-3	6.1751146052302396E-4	G2M
A_AGCGACATCCCATTCA-1	1	KM4242_01	3	Primary	3 --> 3	Oligodendrocyte_like_tumor	NA	Pri_Recurrence_after_TMZ	1p_19q_codeleted	CNA_Group_ 3	9.2017991138640898E-2	-1.8133705891970001E-2	S
A_AGCGACCAACGATATT-1	0	KM4242_01	3	Primary	3 --> 3	Proneural_OPC_like_tumor	NA	Pri_Recurrence_after_TMZ	1p_19q_codeleted	CNA_Group_ 2	4.1556808252847703E-3	1.9032073380763102E-2	G2M
A_AGCGCATAATGAATCG-1	0	KM4242_01	3	Primary	3 --> 3	Proneural_OPC_like_tumor	G3	Pri_Recurrence_after_TMZ	1p_19q_codeleted	CNA_Group_ 2	-2.7309938213679699E-3	-4.0329745202547403E-2	G1
A_AGCGCGGGTGCCAATG-1	1	KM4242_01	3	Primary	3 --> 3	Oligodendrocyte_like_tumor	NA	Pri_Recurrence_after_TMZ	1p_19q_codeleted	CNA_Group_ 2	-5.0770889378238301E-2	1.47504871793274E-2	G2M
A_AGCGGACACTTCGTAG-1	0	KM4242_01	3	Primary	3 --> 3	Proneural_OPC_like_tumor	G3	Pri_Recurrence_after_TMZ	NA	NA	-3.02503475500186E-2	-3.6604469378454997E-2	G1
A_AGCGGGTCTGACACTC-1	0	KM4242_01	3	Primary	3 --> 3	Proneural_OPC_like_tumor	G3	Pri_Recurrence_after_TMZ	1p_19q_codeleted	CNA_Group_ 1	2.6570369628671198E-2	1.8169075271214301E-2	S
A_AGCGTGGTATTCTACT-1	0	KM4242_01	3	Primary	3 --> 3	Proneural_OPC_like_tumor	G3	Pri_Recurrence_after_TMZ	1p_19q_codeleted	CNA_Group_ 1	7.4473815184560296E-2	-1.7041419383097701E-2	S
A_AGCTAAGTACGCAGGC-1	0	KM4242_01	3	Primary	3 --> 3	Proneural_OPC_like_tumor	G3	Pri_Recurrence_after_TMZ	1p_19q_codeleted	CNA_Group_ 1	-1.53556174079858E-2	4.1835045825684104E-3	G2M
A_AGCTATTTAATCCAAC-1	3	KM4242_01	3	Primary	3 --> 3	RBCs	RBCs	Pri_Recurrence_after_TMZ	1p_19q_codeleted	CNA_Group_ 1	-5.3353014894161097E-2	1.24457306468789E-2	G2M
A_AGCTCCTTCGCACATC-1	1	KM4242_01	3	Primary	3 --> 3	Oligodendrocyte_like_tumor	NA	Pri_Recurrence_after_TMZ	1p_19q_codeleted	CNA_Group_ 3	-3.1307918529735003E-2	3.7100281220445099E-2	G2M
A_AGCTCTAGACGTTCCA-1	1	KM4242_01	3	Primary	3 --> 3	Oligodendrocyte_like_tumor	NA	Pri_Recurrence_after_TMZ	1p_19q_codeleted	CNA_Group_ 1	3.4418897798429798E-2	1.4059527636192701E-3	S
A_AGCTCTTCCCAGTGCA-1	1	KM4242_01	3	Primary	3 --> 3	Oligodendrocyte_like_tumor	NA	Pri_Recurrence_after_TMZ	1p_19q_codeleted	CNA_Group_ 4	-3.9486528593246903E-2	-3.4252128462906498E-2	G1
A_AGCTCTTTACTCAGTT-1	0	KM4242_01	3	Primary	3 --> 3	Proneural_OPC_like_tumor	G3	Pri_Recurrence_after_TMZ	1p_19q_codeleted	CNA_Group_ 1	-1.7234723409268501E-2	-2.6451201438461198E-2	G1
A_AGCTGAAGTAAACCAA-1	1	KM4242_01	3	Primary	3 --> 3	Oligodendrocyte_like_tumor	NA	Pri_Recurrence_after_TMZ	1p_19q_codeleted	CNA_Group_ 2	1.5680719008743901E-2	-6.4681901298505803E-2	S
A_AGCTTGATCTTAACTT-1	0	KM4242_01	3	Primary	3 --> 3	Proneural_OPC_like_tumor	G3	Pri_Recurrence_after_TMZ	1p_19q_codeleted	CNA_Group_ 1	9.9749118216433397E-2	-7.4367614838350304E-2	S
A_AGGAAGCTGTCCGCCG-1	0	KM4242_01	3	Primary	3 --> 3	Proneural_OPC_like_tumor	G3	Pri_Recurrence_after_TMZ	NA	NA	-1.54777153209572E-2	1.1908869752746401E-2	G2M
A_AGGACAGTCGAATCCC-1	0	KM4242_01	3	Primary	3 --> 3	Proneural_OPC_like_tumor	NA	Pri_Recurrence_after_TMZ	1p_19q_codeleted	CNA_Group_ 1	1.0930794652190901E-2	4.2391635928727004E-3	S
A_AGGACATCGCACGTCG-1	1	KM4242_01	3	Primary	3 --> 3	Oligodendrocyte_like_tumor	NA	Pri_Recurrence_after_TMZ	1p_19q_codeleted	CNA_Group_ 3	3.1076773157077599E-2	-3.4168333081060501E-2	S
A_AGGACGACCCATTAGA-1	0	KM4242_01	3	Primary	3 --> 3	Proneural_OPC_like_tumor	G3	Pri_Recurrence_after_TMZ	1p_19q_codeleted	CNA_Group_ 1	0.105518085651586	-3.24939587501041E-2	S
A_AGGATAAAGTCGGGAT-1	0	KM4242_01	3	Primary	3 --> 3	Proneural_OPC_like_tumor	G3	Pri_Recurrence_after_TMZ	1p_19q_codeleted	CNA_Group_ 2	3.2406801509961197E-2	-2.9133772565040499E-2	S
A_AGGCAGATGCGTAAAC-1	1	KM4242_01	3	Primary	3 --> 3	Oligodendrocyte_like_tumor	NA	Pri_Recurrence_after_TMZ	1p_19q_codeleted	CNA_Group_ 3	4.5038597372198501E-3	3.5991025827135897E-2	G2M
A_AGGCCACCCGTTATGA-1	2	KM4242_01	3	Primary	3 --> 3	NPC_like_tumor	G3	Pri_Recurrence_after_TMZ	non_tumor	NA	6.91649814013192E-2	1.8680068540258499E-2	S
A_AGGCCCATTGTACAGG-1	1	KM4242_01	3	Primary	3 --> 3	Oligodendrocyte_like_tumor	NA	Pri_Recurrence_after_TMZ	1p_19q_codeleted	CNA_Group_ 3	-4.2591141282767503E-2	-5.2199138684606303E-3	G1
A_AGGCCTGAGAATCTCG-1	0	KM4242_01	3	Primary	3 --> 3	Proneural_OPC_like_tumor	G3	Pri_Recurrence_after_TMZ	1p_19q_codeleted	CNA_Group_ 1	1.4540330330384E-2	9.6080953470051005E-3	S
A_AGGCTATGGTTAGCTT-1	0	KM4242_01	3	Primary	3 --> 3	Proneural_OPC_like_tumor	G3	Pri_Recurrence_after_TMZ	1p_19q_codeleted	CNA_Group_ 3	-3.9184742183690002E-2	-4.6636209196946499E-2	G1
A_AGGCTTCCCGAAGAAG-1	0	KM4242_01	3	Primary	3 --> 3	Proneural_OPC_like_tumor	G3	Pri_Recurrence_after_TMZ	1p_19q_codeleted	CNA_Group_ 1	4.6562692495338599E-3	-3.4742035368412402E-2	S
A_AGGCTTGCTAGACACC-1	0	KM4242_01	3	Primary	3 --> 3	Proneural_OPC_like_tumor	G3	Pri_Recurrence_after_TMZ	1p_19q_codeleted	CNA_Group_ 1	2.5724975391700398E-2	-5.79919600074369E-2	S
A_AGGGACTCTACGCGAC-1	0	KM4242_01	3	Primary	3 --> 3	Proneural_OPC_like_tumor	G3	Pri_Recurrence_after_TMZ	1p_19q_codeleted	CNA_Group_ 2	3.4098253964490802E-2	1.2608066140202301E-2	S
A_AGGGCGTGATCGGCTA-1	7	KM4242_01	3	Primary	3 --> 3	Cortical_neurons_and_tumor_cells	Cortical_neurons_and_tumor_cells	Pri_Recurrence_after_TMZ	non_tumor	CNA_Group_ 2	5.3535095810006497E-2	-7.9119939364447195E-3	S
A_AGGGCTGCAGTTACAG-1	0	KM4242_01	3	Primary	3 --> 3	Proneural_OPC_like_tumor	NA	Pri_Recurrence_after_TMZ	1p_19q_codeleted	CNA_Group_ 3	2.1306258461630902E-2	4.3836986669945899E-3	S
A_AGGGTGCTCTCGAGGG-1	1	KM4242_01	3	Primary	3 --> 3	Oligodendrocyte_like_tumor	NA	Pri_Recurrence_after_TMZ	1p_19q_codeleted	CNA_Group_ 2	4.7192915260974702E-2	-1.9950696934124899E-2	S
A_AGGGTTCCCTTTGGTT-1	4	KM4242_01	3	Primary	3 --> 3	Pericyte_Endothelial	Pericyte_Endothelial	Pri_Recurrence_after_TMZ	non_tumor	CNA_Group_ 2	-1.9402060355669701E-2	-5.2095376196442798E-2	G1
A_AGGGTTTAGTTCGGGA-1	0	KM4242_01	3	Primary	3 --> 3	Proneural_OPC_like_tumor	NA	Pri_Recurrence_after_TMZ	1p_19q_codeleted	CNA_Group_ 1	9.06220113344849E-2	3.9023695048475603E-2	S
A_AGGTAGGTACAAAGCT-1	0	KM4242_01	3	Primary	3 --> 3	Proneural_OPC_like_tumor	G3	Pri_Recurrence_after_TMZ	1p_19q_codeleted	CNA_Group_ 1	-2.6310650530221701E-2	-4.3289738261008799E-2	G1
A_AGGTGTATCGCCATGA-1	0	KM4242_01	3	Primary	3 --> 3	Proneural_OPC_like_tumor	G3	Pri_Recurrence_after_TMZ	1p_19q_codeleted	CNA_Group_ 1	-5.2651186895247899E-2	4.3934695762233598E-2	G2M
A_AGGTTGAGGCACGCTT-1	1	KM4242_01	3	Primary	3 --> 3	Oligodendrocyte_like_tumor	NA	Pri_Recurrence_after_TMZ	1p_19q_codeleted	CNA_Group_ 3	-1.91880076847172E-2	-1.6487301833801701E-2	G1
A_AGGTTTCACACACCTT-1	0	KM4242_01	3	Primary	3 --> 3	Proneural_OPC_like_tumor	G3	Pri_Recurrence_after_TMZ	1p_19q_codeleted	CNA_Group_ 1	4.1632804082779602E-3	5.1780682574761601E-2	G2M
A_AGTAATGTCTTGCCGC-1	3	KM4242_01	3	Primary	3 --> 3	RBCs	RBCs	Pri_Recurrence_after_TMZ	1p_19q_codeleted	CNA_Group_ 2	9.1198953586135806E-2	2.8127571647528299E-2	S
A_AGTACGGCCCGTATCG-1	2	KM4242_01	3	Primary	3 --> 3	NPC_like_tumor	G3	Pri_Recurrence_after_TMZ	non_tumor	NA	-5.42487583381649E-2	-2.23508103469796E-2	G1
A_AGTACGGGCACCTGGC-1	4	KM4242_01	3	Primary	3 --> 3	Pericyte_Endothelial	Pericyte_Endothelial	Pri_Recurrence_after_TMZ	1p_19q_codeleted	CNA_Group_ 3	-4.1130432408906098E-2	-3.3355656235510699E-2	G1
A_AGTACTCTTATGCCCA-1	0	KM4242_01	3	Primary	3 --> 3	Proneural_OPC_like_tumor	NA	Pri_Recurrence_after_TMZ	1p_19q_codeleted	CNA_Group_ 1	1.7961865226382202E-2	1.4595834825294E-2	S
A_AGTATAATACTAGGCA-1	0	KM4242_01	3	Primary	3 --> 3	Proneural_OPC_like_tumor	G3	Pri_Recurrence_after_TMZ	1p_19q_codeleted	CNA_Group_ 1	2.6527255816961399E-3	-1.5810846651433601E-2	S
A_AGTATTTGGCACGACC-1	0	KM4242_01	3	Primary	3 --> 3	Proneural_OPC_like_tumor	G3	Pri_Recurrence_after_TMZ	1p_19q_codeleted	CNA_Group_ 1	-1.9236238663916501E-2	7.28891870398936E-3	G2M
A_AGTCAACACCACCATC-1	0	KM4242_01	3	Primary	3 --> 3	Proneural_OPC_like_tumor	G3	Pri_Recurrence_after_TMZ	1p_19q_codeleted	CNA_Group_ 1	2.3240978883178999E-3	-1.5082618656290301E-2	S
A_AGTCGACGGTCTCAAG-1	1	KM4242_01	3	Primary	3 --> 3	Oligodendrocyte_like_tumor	NA	Pri_Recurrence_after_TMZ	1p_19q_codeleted	CNA_Group_ 3	-3.3588789550083202E-2	-2.0534927500226299E-2	G1
A_AGTCGGCCCAAACGAC-1	0	KM4242_01	3	Primary	3 --> 3	Proneural_OPC_like_tumor	G3	Pri_Recurrence_after_TMZ	1p_19q_codeleted	CNA_Group_ 1	7.1226576407066297E-2	4.4854326462043896E-3	S
A_AGTCGTATAAAGCAGA-1	0	KM4242_01	3	Primary	3 --> 3	Proneural_OPC_like_tumor	G3	Pri_Recurrence_after_TMZ	1p_19q_codeleted	CNA_Group_ 1	2.6832938682011E-2	3.7062291361730698E-2	G2M
A_AGTCTTCTCCTCAAAT-1	1	KM4242_01	3	Primary	3 --> 3	Oligodendrocyte_like_tumor	NA	Pri_Recurrence_after_TMZ	1p_19q_codeleted	CNA_Group_ 1	-5.4309028487705396E-3	4.9542308453091599E-2	G2M
A_AGTCTTTAAAGTGTCC-1	0	KM4242_01	3	Primary	3 --> 3	Proneural_OPC_like_tumor	G3	Pri_Recurrence_after_TMZ	1p_19q_codeleted	CNA_Group_ 2	-4.17976760085823E-2	1.41696054806792E-2	G2M
A_AGTGACCTACTTTACG-1	0	KM4242_01	3	Primary	3 --> 3	Proneural_OPC_like_tumor	G3	Pri_Recurrence_after_TMZ	1p_19q_codeleted	CNA_Group_ 3	2.72095685867178E-3	-4.38144295662787E-3	S
A_AGTGAGACTTCCAGTA-1	1	KM4242_01	3	Primary	3 --> 3	Oligodendrocyte_like_tumor	NA	Pri_Recurrence_after_TMZ	1p_19q_codeleted	CNA_Group_ 3	6.0849760322166602E-2	1.88872438400625E-2	S
A_AGTGATAACCTGCGCG-1	0	KM4242_01	3	Primary	3 --> 3	Proneural_OPC_like_tumor	G3	Pri_Recurrence_after_TMZ	1p_19q_codeleted	CNA_Group_ 1	4.8637232019415E-2	0.17057738015190499	G2M
A_AGTGATATGAGTAGTT-1	0	KM4242_01	3	Primary	3 --> 3	Proneural_OPC_like_tumor	G3	Pri_Recurrence_after_TMZ	1p_19q_codeleted	CNA_Group_ 1	-1.79140496180509E-2	-3.2875125546590598E-3	G1
A_AGTGATTCAAGCAGGA-1	1	KM4242_01	3	Primary	3 --> 3	Oligodendrocyte_like_tumor	NA	Pri_Recurrence_after_TMZ	1p_19q_codeleted	CNA_Group_ 2	7.7134374715594903E-3	5.1306005427237802E-2	G2M
A_AGTGCTAAACACAGCA-1	0	KM4242_01	3	Primary	3 --> 3	Proneural_OPC_like_tumor	G3	Pri_Recurrence_after_TMZ	1p_19q_codeleted	CNA_Group_ 1	3.00878070762234E-3	-1.5799841123175201E-3	S
A_AGTGCTTGCACGAATA-1	1	KM4242_01	3	Primary	3 --> 3	Oligodendrocyte_like_tumor	NA	Pri_Recurrence_after_TMZ	1p_19q_codeleted	CNA_Group_ 2	3.34504120146355E-2	2.37194435212153E-2	S
A_AGTGGCGGCAATTTGA-1	1	KM4242_01	3	Primary	3 --> 3	Oligodendrocyte_like_tumor	NA	Pri_Recurrence_after_TMZ	1p_19q_codeleted	CNA_Group_ 3	-6.5211635897238301E-2	3.9362084061402701E-2	G2M
A_AGTGGCGTCTGAAGGT-1	0	KM4242_01	3	Primary	3 --> 3	Proneural_OPC_like_tumor	G3	Pri_Recurrence_after_TMZ	1p_19q_codeleted	CNA_Group_ 1	0.12824347915352	2.77150378983059E-2	S
A_AGTGTGGTCTATTGTG-1	1	KM4242_01	3	Primary	3 --> 3	Oligodendrocyte_like_tumor	G3	Pri_Recurrence_after_TMZ	1p_19q_codeleted	CNA_Group_ 3	-1.69045992166829E-2	-1.24689052835848E-2	G1
A_AGTTAAACACTTGCGA-1	0	KM4242_01	3	Primary	3 --> 3	Proneural_OPC_like_tumor	G3	Pri_Recurrence_after_TMZ	1p_19q_codeleted	CNA_Group_ 1	7.0688152628485103E-3	9.0213481243233799E-3	G2M
A_AGTTAAGCGGTCCCGG-1	1	KM4242_01	3	Primary	3 --> 3	Oligodendrocyte_like_tumor	NA	Pri_Recurrence_after_TMZ	1p_19q_codeleted	CNA_Group_ 3	-2.8042102688426201E-2	-3.7665978863184002E-3	G1
A_AGTTCCTACAGAATTA-1	4	KM4242_01	3	Primary	3 --> 3	Pericyte_Endothelial	Pericyte_Endothelial	Pri_Recurrence_after_TMZ	1p_19q_codeleted	CNA_Group_ 1	1.331811509288E-3	2.19770076541877E-2	G2M
A_AGTTCCTATTTATGTT-1	0	KM4242_01	3	Primary	3 --> 3	Proneural_OPC_like_tumor	G3	Pri_Recurrence_after_TMZ	1p_19q_codeleted	CNA_Group_ 1	7.4190922195006698E-2	6.0070326233739903E-2	S
A_AGTTGACGGTCCTTGC-1	0	KM4242_01	3	Primary	3 --> 3	Proneural_OPC_like_tumor	G3	Pri_Recurrence_after_TMZ	1p_19q_codeleted	CNA_Group_ 3	-1.7969323139795101E-2	3.1054390983369E-3	G2M
A_AGTTTGCACCTGCCTC-1	0	KM4242_01	3	Primary	3 --> 3	Proneural_OPC_like_tumor	G3	Pri_Recurrence_after_TMZ	1p_19q_codeleted	CNA_Group_ 2	-3.6543051409658002E-2	3.01538710460914E-2	G2M
A_AGTTTGGCCAGACCTA-1	0	KM4242_01	3	Primary	3 --> 3	Proneural_OPC_like_tumor	G3	Pri_Recurrence_after_TMZ	1p_19q_codeleted	CNA_Group_ 1	0.22427764320177199	1.2407906786155999E-2	S
A_ATAAACGGACCCGTAA-1	5	KM4242_01	3	Primary	3 --> 3	NPC_like_and_DNA_damage	G3	Pri_Recurrence_after_TMZ	1p_19q_codeleted	CNA_Group_ 2	-3.26285924214363E-2	6.0258182651824104E-3	G2M
A_ATAAAGGCTCGGTCGT-1	0	KM4242_01	3	Primary	3 --> 3	Proneural_OPC_like_tumor	G3	Pri_Recurrence_after_TMZ	1p_19q_codeleted	CNA_Group_ 1	2.3198446848187001E-2	-4.4430694782724198E-2	S
A_ATAAATATTAGCAGCT-1	5	KM4242_01	3	Primary	3 --> 3	NPC_like_and_DNA_damage	G3	Pri_Recurrence_after_TMZ	1p_19q_codeleted	CNA_Group_ 1	-3.4156181814765102E-4	3.2129208652715298E-2	G2M
A_ATAACGCCGGAGGGTC-1	1	KM4242_01	3	Primary	3 --> 3	Oligodendrocyte_like_tumor	NA	Pri_Recurrence_after_TMZ	1p_19q_codeleted	CNA_Group_ 2	5.2831860737572602E-2	1.6435116877224899E-3	S
A_ATAACGGAGTCCAACG-1	1	KM4242_01	3	Primary	3 --> 3	Oligodendrocyte_like_tumor	NA	Pri_Recurrence_after_TMZ	1p_19q_codeleted	CNA_Group_ 2	4.68303130347082E-2	-2.71945736267429E-2	S
A_ATAAGGTGGAGAACAT-1	0	KM4242_01	3	Primary	3 --> 3	Proneural_OPC_like_tumor	G3	Pri_Recurrence_after_TMZ	1p_19q_codeleted	CNA_Group_ 1	2.0366067974260799E-2	-4.1329566046767203E-3	S
A_ATAAGTTACCGCGACG-1	0	KM4242_01	3	Primary	3 --> 3	Proneural_OPC_like_tumor	G3	Pri_Recurrence_after_TMZ	1p_19q_codeleted	CNA_Group_ 1	3.5610914506264503E-2	1.5695865633960599E-2	S
A_ATAATAGCTGTTGAAT-1	0	KM4242_01	3	Primary	3 --> 3	Proneural_OPC_like_tumor	G3	Pri_Recurrence_after_TMZ	1p_19q_codeleted	CNA_Group_ 1	-3.1739936299912501E-2	4.8805530799659998E-2	G2M
A_ATAATAGTGTAGGGAC-1	1	KM4242_01	3	Primary	3 --> 3	Oligodendrocyte_like_tumor	G3	Pri_Recurrence_after_TMZ	1p_19q_codeleted	CNA_Group_ 3	-1.87528784418113E-2	-4.1510864807715403E-2	G1
A_ATAATCTTGGAGAACC-1	0	KM4242_01	3	Primary	3 --> 3	Proneural_OPC_like_tumor	G3	Pri_Recurrence_after_TMZ	1p_19q_codeleted	CNA_Group_ 1	4.5420143880345501E-2	-5.63897033761964E-2	S
A_ATAATTAGCTAAGTAG-1	0	KM4242_01	3	Primary	3 --> 3	Proneural_OPC_like_tumor	G3	Pri_Recurrence_after_TMZ	1p_19q_codeleted	CNA_Group_ 2	3.0242917236619801E-2	-4.3490965557480298E-2	S
A_ATACAGGCCCTCCAAT-1	0	KM4242_01	3	Primary	3 --> 3	Proneural_OPC_like_tumor	G3	Pri_Recurrence_after_TMZ	1p_19q_codeleted	CNA_Group_ 2	2.90576033127799E-2	4.5774316088894901E-2	G2M
A_ATACCACGGGCAACTT-1	5	KM4242_01	3	Primary	3 --> 3	NPC_like_and_DNA_damage	G3	Pri_Recurrence_after_TMZ	non_tumor	CNA_Group_ 1	7.9594946825586294E-2	-1.1864176116564099E-2	S
A_ATACCTAACCAAGAAA-1	0	KM4242_01	3	Primary	3 --> 3	Proneural_OPC_like_tumor	G3	Pri_Recurrence_after_TMZ	1p_19q_codeleted	CNA_Group_ 2	-4.8407058567934001E-2	1.0694233978375199E-2	G2M
A_ATACGCCGGCGAAACC-1	4	KM4242_01	3	Primary	3 --> 3	Pericyte_Endothelial	Pericyte_Endothelial	Pri_Recurrence_after_TMZ	1p_19q_codeleted	CNA_Group_ 3	-5.3752889755828398E-2	1.91493048804461E-2	G2M
A_ATACGGGTTTCGATTG-1	1	KM4242_01	3	Primary	3 --> 3	Oligodendrocyte_like_tumor	NA	Pri_Recurrence_after_TMZ	1p_19q_codeleted	CNA_Group_ 3	1.5555358868023899E-2	1.9088249726676599E-2	G2M
A_ATACGGTGAAGATGCA-1	0	KM4242_01	3	Primary	3 --> 3	Proneural_OPC_like_tumor	G3	Pri_Recurrence_after_TMZ	1p_19q_codeleted	CNA_Group_ 1	1.4260728416020999E-2	-1.2903920166563901E-2	S
A_ATACGTACTTAGCCAC-1	0	KM4242_01	3	Primary	3 --> 3	Proneural_OPC_like_tumor	G3	Pri_Recurrence_after_TMZ	1p_19q_codeleted	CNA_Group_ 2	-5.4436105687756697E-2	-3.8785073940065903E-2	G1
A_ATACGTTATGCACGGA-1	0	KM4242_01	3	Primary	3 --> 3	Proneural_OPC_like_tumor	G3	Pri_Recurrence_after_TMZ	1p_19q_codeleted	CNA_Group_ 2	4.8995675138316597E-2	-3.13464087099216E-2	S
A_ATACTAGCATGACCCT-1	1	KM4242_01	3	Primary	3 --> 3	Oligodendrocyte_like_tumor	NA	Pri_Recurrence_after_TMZ	1p_19q_codeleted	CNA_Group_ 2	3.81406216186106E-2	3.2059705520163302E-2	S
A_ATACTGCCTTACACCG-1	6	KM4242_01	3	Primary	3 --> 3	IEG	G3	Pri_Recurrence_after_TMZ	1p_19q_codeleted	CNA_Group_ 1	1.0371327749858999E-2	0.10974371190904	G2M
A_ATAGACAACGGGACCT-1	4	KM4242_01	3	Primary	3 --> 3	Pericyte_Endothelial	Pericyte_Endothelial	Pri_Recurrence_after_TMZ	1p_19q_codeleted	CNA_Group_ 2	-1.8001742372115999E-2	-2.0995886051892999E-2	G1
A_ATAGACGAAGAGAAAG-1	4	KM4242_01	3	Primary	3 --> 3	Pericyte_Endothelial	Pericyte_Endothelial	Pri_Recurrence_after_TMZ	1p_19q_codeleted	CNA_Group_ 2	-5.72793944977915E-2	-3.4323619514788302E-2	G1
A_ATAGAGTACTGGGACA-1	0	KM4242_01	3	Primary	3 --> 3	Proneural_OPC_like_tumor	G3	Pri_Recurrence_after_TMZ	1p_19q_codeleted	CNA_Group_ 1	-5.5825131624078303E-2	-6.6616129924126202E-2	G1
A_ATAGAGTTATCAACTT-1	1	KM4242_01	3	Primary	3 --> 3	Oligodendrocyte_like_tumor	NA	Pri_Recurrence_after_TMZ	1p_19q_codeleted	CNA_Group_ 5	3.0082128570692399E-2	1.45411681746707E-2	S
A_ATAGCAACTAGGGAAG-1	0	KM4242_01	3	Primary	3 --> 3	Proneural_OPC_like_tumor	NA	Pri_Recurrence_after_TMZ	1p_19q_codeleted	CNA_Group_ 2	2.93200764091604E-2	-6.8854972168521503E-2	S
A_ATAGGCGGCTATAGAA-1	0	KM4242_01	3	Primary	3 --> 3	Proneural_OPC_like_tumor	G3	Pri_Recurrence_after_TMZ	1p_19q_codeleted	CNA_Group_ 1	9.2509076384521396E-2	-1.3196480260244101E-4	S
A_ATAGGGATATCCTTGA-1	1	KM4242_01	3	Primary	3 --> 3	Oligodendrocyte_like_tumor	NA	Pri_Recurrence_after_TMZ	1p_19q_codeleted	CNA_Group_ 3	-1.0972280615717599E-2	-1.6815432601362699E-3	G1
A_ATAGGTTGGGCAGATG-1	1	KM4242_01	3	Primary	3 --> 3	Oligodendrocyte_like_tumor	NA	Pri_Recurrence_after_TMZ	1p_19q_codeleted	CNA_Group_ 2	-3.14935191812869E-2	-1.3466960103521301E-3	G1
A_ATAGTGAAGCGTTCTC-1	0	KM4242_01	3	Primary	3 --> 3	Proneural_OPC_like_tumor	G3	Pri_Recurrence_after_TMZ	1p_19q_codeleted	CNA_Group_ 1	6.6448962483107998E-2	-3.0221402876382399E-2	S
A_ATATAAAGCGCTCGTG-1	0	KM4242_01	3	Primary	3 --> 3	Proneural_OPC_like_tumor	G3	Pri_Recurrence_after_TMZ	1p_19q_codeleted	CNA_Group_ 2	3.1419404630244598E-2	1.47014199529301E-2	S
A_ATATAAATGTAGCTGC-1	0	KM4242_01	3	Primary	3 --> 3	Proneural_OPC_like_tumor	G3	Pri_Recurrence_after_TMZ	1p_19q_codeleted	CNA_Group_ 1	7.7068251366611898E-2	-1.8064355430349899E-2	S
A_ATATCTCCCTCGTTAA-1	1	KM4242_01	3	Primary	3 --> 3	Oligodendrocyte_like_tumor	NA	Pri_Recurrence_after_TMZ	1p_19q_codeleted	CNA_Group_ 3	-2.4408826698226302E-3	1.9171030092336599E-3	G2M
A_ATATCTTAGGGCCTTC-1	0	KM4242_01	3	Primary	3 --> 3	Proneural_OPC_like_tumor	NA	Pri_Recurrence_after_TMZ	1p_19q_codeleted	CNA_Group_ 1	1.6154191776034599E-2	2.3671971399068899E-2	G2M
A_ATATTCAGTTAAACCT-1	0	KM4242_01	3	Primary	3 --> 3	Proneural_OPC_like_tumor	G3	Pri_Recurrence_after_TMZ	1p_19q_codeleted	CNA_Group_ 1	-2.0348774158603401E-2	-3.2825236610145303E-2	G1
A_ATATTCCACATAGTGA-1	6	KM4242_01	3	Primary	3 --> 3	IEG	G3	Pri_Recurrence_after_TMZ	1p_19q_codeleted	CNA_Group_ 1	2.63627444906821E-2	1.35233733440098E-2	S
A_ATATTGCTGTCAAAGT-1	4	KM4242_01	3	Primary	3 --> 3	Pericyte_Endothelial	Pericyte_Endothelial	Pri_Recurrence_after_TMZ	1p_19q_codeleted	CNA_Group_ 3	-7.0798043369425107E-2	-3.6618506959407299E-2	G1
A_ATATTTAACCCTCAAG-1	0	KM4242_01	3	Primary	3 --> 3	Proneural_OPC_like_tumor	G3	Pri_Recurrence_after_TMZ	1p_19q_codeleted	CNA_Group_ 1	0.12830129665422299	7.9251558105297701E-2	S
A_ATCAATCTGGGCTGCA-1	0	KM4242_01	3	Primary	3 --> 3	Proneural_OPC_like_tumor	NA	Pri_Recurrence_after_TMZ	1p_19q_codeleted	CNA_Group_ 1	1.49935399140649E-2	-1.1602962271818501E-3	S
A_ATCACATTAGAATATC-1	1	KM4242_01	3	Primary	3 --> 3	Oligodendrocyte_like_tumor	NA	Pri_Recurrence_after_TMZ	1p_19q_codeleted	CNA_Group_ 3	-3.2106116768029297E-2	-2.6844249472179699E-2	G1
A_ATCACGTGCTAATTAA-1	5	KM4242_01	3	Primary	3 --> 3	NPC_like_and_DNA_damage	G3	Pri_Recurrence_after_TMZ	1p_19q_codeleted	CNA_Group_ 1	8.2591616652757605E-2	0.100052014892379	G2M
A_ATCACTTCATCCTCGC-1	1	KM4242_01	3	Primary	3 --> 3	Oligodendrocyte_like_tumor	NA	Pri_Recurrence_after_TMZ	1p_19q_codeleted	CNA_Group_ 3	-2.62807441226738E-2	-1.04870297093118E-2	G1
A_ATCAGACGGCACGCCG-1	0	KM4242_01	3	Primary	3 --> 3	Proneural_OPC_like_tumor	G3	Pri_Recurrence_after_TMZ	1p_19q_codeleted	CNA_Group_ 1	9.2289877671922704E-2	1.1016370518456199E-2	S
A_ATCAGCCTCATGCTGC-1	0	KM4242_01	3	Primary	3 --> 3	Proneural_OPC_like_tumor	G3	Pri_Recurrence_after_TMZ	1p_19q_codeleted	CNA_Group_ 1	6.2287829150105702E-2	-5.6982852512466001E-2	S
A_ATCAGTAGGCAGGGAT-1	1	KM4242_01	3	Primary	3 --> 3	Oligodendrocyte_like_tumor	NA	Pri_Recurrence_after_TMZ	1p_19q_codeleted	CNA_Group_ 3	-4.2820579949473303E-2	4.8913501218303103E-2	G2M
A_ATCATCCAATATTTGT-1	0	KM4242_01	3	Primary	3 --> 3	Proneural_OPC_like_tumor	G3	Pri_Recurrence_after_TMZ	1p_19q_codeleted	CNA_Group_ 1	5.1980350281206199E-2	-4.4100651318443297E-2	S
A_ATCCAACGCAGTCATA-1	0	KM4242_01	3	Primary	3 --> 3	Proneural_OPC_like_tumor	G3	Pri_Recurrence_after_TMZ	1p_19q_codeleted	CNA_Group_ 1	6.9030752236908993E-2	0.16989079662496301	G2M
A_ATCCAATGGAGGGTCC-1	0	KM4242_01	3	Primary	3 --> 3	Proneural_OPC_like_tumor	G3	Pri_Recurrence_after_TMZ	1p_19q_codeleted	CNA_Group_ 1	-9.9289402322550492E-3	6.1800980076486302E-2	G2M
A_ATCCACATCGACAGAA-1	0	KM4242_01	3	Primary	3 --> 3	Proneural_OPC_like_tumor	G3	Pri_Recurrence_after_TMZ	1p_19q_codeleted	CNA_Group_ 3	4.7478974306149002E-2	1.7753944032421299E-2	S
A_ATCCAGAGCAACAACC-1	0	KM4242_01	3	Primary	3 --> 3	Proneural_OPC_like_tumor	G3	Pri_Recurrence_after_TMZ	1p_19q_codeleted	CNA_Group_ 1	7.8492184173797594E-2	-8.5484559838510908E-3	S
A_ATCCAGGATTCGTGAA-1	0	KM4242_01	3	Primary	3 --> 3	Proneural_OPC_like_tumor	G3	Pri_Recurrence_after_TMZ	1p_19q_codeleted	CNA_Group_ 1	2.37284330940962E-2	-1.0690042642662699E-2	S
A_ATCCTACCTAAGCTCT-1	0	KM4242_01	3	Primary	3 --> 3	Proneural_OPC_like_tumor	G3	Pri_Recurrence_after_TMZ	1p_19q_codeleted	CNA_Group_ 1	6.6315528118513697E-2	-5.5055416550347201E-2	S
A_ATCCTGAATCGCTGCG-1	0	KM4242_01	3	Primary	3 --> 3	Proneural_OPC_like_tumor	G3	Pri_Recurrence_after_TMZ	1p_19q_codeleted	CNA_Group_ 1	3.8801389418535302E-2	-7.5724958232711304E-2	S
A_ATCCTGCGTGGAATGG-1	0	KM4242_01	3	Primary	3 --> 3	Proneural_OPC_like_tumor	G3	Pri_Recurrence_after_TMZ	1p_19q_codeleted	CNA_Group_ 1	-2.93707736897716E-2	-4.3356577065119299E-2	G1
A_ATCGACCCAATACAGA-1	0	KM4242_01	3	Primary	3 --> 3	Proneural_OPC_like_tumor	G3	Pri_Recurrence_after_TMZ	1p_19q_codeleted	CNA_Group_ 1	-1.9889640095086598E-2	-3.7220697869400403E-2	G1
A_ATCGACTCTTTCCGTT-1	1	KM4242_01	3	Primary	3 --> 3	Oligodendrocyte_like_tumor	NA	Pri_Recurrence_after_TMZ	1p_19q_codeleted	CNA_Group_ 2	6.8546949902052498E-2	-8.6651645434286193E-3	S
A_ATCGCACGCCGGGAGA-1	0	KM4242_01	3	Primary	3 --> 3	Proneural_OPC_like_tumor	NA	Pri_Recurrence_after_TMZ	1p_19q_codeleted	CNA_Group_ 1	-2.6115419328319601E-2	2.1627001584512601E-2	G2M
A_ATCGGAGACAGACGGC-1	0	KM4242_01	3	Primary	3 --> 3	Proneural_OPC_like_tumor	G3	Pri_Recurrence_after_TMZ	1p_19q_codeleted	CNA_Group_ 1	2.5314088856781301E-2	-9.7770773810786898E-3	S
A_ATCGGTTACCTAGTAA-1	5	KM4242_01	3	Primary	3 --> 3	NPC_like_and_DNA_damage	G3	Pri_Recurrence_after_TMZ	1p_19q_codeleted	CNA_Group_ 1	-1.13805524009482E-2	-8.7649379075763797E-2	G1
A_ATCTAATATCCTACGG-1	0	KM4242_01	3	Primary	3 --> 3	Proneural_OPC_like_tumor	G3	Pri_Recurrence_after_TMZ	1p_19q_codeleted	CNA_Group_ 2	-4.7009361489797098E-2	-1.98443038520346E-2	G1
A_ATCTACCATCTGCTCC-1	0	KM4242_01	3	Primary	3 --> 3	Proneural_OPC_like_tumor	G3	Pri_Recurrence_after_TMZ	1p_19q_codeleted	CNA_Group_ 1	0.12101914080007101	-1.6985503586885699E-2	S
A_ATCTAGCTTGTGAGGG-1	0	KM4242_01	3	Primary	3 --> 3	Proneural_OPC_like_tumor	G3	Pri_Recurrence_after_TMZ	1p_19q_codeleted	CNA_Group_ 1	6.5437003494908899E-2	-1.76531455776676E-2	S
A_ATCTGGGCTGTTCTTG-1	0	KM4242_01	3	Primary	3 --> 3	Proneural_OPC_like_tumor	G3	Pri_Recurrence_after_TMZ	1p_19q_codeleted	CNA_Group_ 2	3.0568433336651799E-2	-3.2594334859641201E-2	S
A_ATCTGGTTAAGACTGT-1	1	KM4242_01	3	Primary	3 --> 3	Oligodendrocyte_like_tumor	NA	Pri_Recurrence_after_TMZ	1p_19q_codeleted	CNA_Group_ 2	6.7088765695047098E-3	-5.8529185119286599E-2	S
A_ATCTGTAATTGTACCC-1	1	KM4242_01	3	Primary	3 --> 3	Oligodendrocyte_like_tumor	NA	Pri_Recurrence_after_TMZ	1p_19q_codeleted	CNA_Group_ 2	5.4561357734420099E-2	4.8712713166856499E-3	S
A_ATCTTGACCTGCAACG-1	4	KM4242_01	3	Primary	3 --> 3	Pericyte_Endothelial	Pericyte_Endothelial	Pri_Recurrence_after_TMZ	non_tumor	CNA_Group_ 3	-4.0325359764041696E-3	-1.8429480698306602E-2	G1
A_ATGAAGCCAAGGAGCC-1	0	KM4242_01	3	Primary	3 --> 3	Proneural_OPC_like_tumor	NA	Pri_Recurrence_after_TMZ	1p_19q_codeleted	CNA_Group_ 1	1.7473167048712001E-2	-3.2943563725190599E-3	S
A_ATGACGCCGGCTCTAA-1	1	KM4242_01	3	Primary	3 --> 3	Oligodendrocyte_like_tumor	NA	Pri_Recurrence_after_TMZ	1p_19q_codeleted	CNA_Group_ 3	-8.3305422721322905E-3	-2.9272918615486698E-2	G1
A_ATGAGGAGTGTTAATC-1	2	KM4242_01	3	Primary	3 --> 3	NPC_like_tumor	G3	Pri_Recurrence_after_TMZ	non_tumor	NA	-2.38890499227986E-2	-4.46205437237749E-2	G1
A_ATGATCGGGAATAGAC-1	1	KM4242_01	3	Primary	3 --> 3	Oligodendrocyte_like_tumor	NA	Pri_Recurrence_after_TMZ	1p_19q_codeleted	CNA_Group_ 3	-3.73486290253984E-2	-1.54920918138663E-2	G1
A_ATGATGCAATGGTACA-1	0	KM4242_01	3	Primary	3 --> 3	Proneural_OPC_like_tumor	G3	Pri_Recurrence_after_TMZ	1p_19q_codeleted	CNA_Group_ 1	1.2776786816238001E-2	-5.5845614574868703E-2	S
A_ATGCACTACCGCATTG-1	0	KM4242_01	3	Primary	3 --> 3	Proneural_OPC_like_tumor	G3	Pri_Recurrence_after_TMZ	1p_19q_codeleted	CNA_Group_ 1	8.4227626625377305E-2	1.22577120895506E-2	S
A_ATGCATGATCCAGGAT-1	7	KM4242_01	3	Primary	3 --> 3	Cortical_neurons_and_tumor_cells	Cortical_neurons_and_tumor_cells	Pri_Recurrence_after_TMZ	non_tumor	CNA_Group_ 2	5.9991614190869902E-4	9.9635730678685908E-3	G2M
A_ATGCCATTTGCGACCA-1	1	KM4242_01	3	Primary	3 --> 3	Oligodendrocyte_like_tumor	NA	Pri_Recurrence_after_TMZ	1p_19q_codeleted	CNA_Group_ 2	-1.6752709306894702E-2	6.4419429322657802E-3	G2M
A_ATGCCGGTCTTGCATA-1	4	KM4242_01	3	Primary	3 --> 3	Pericyte_Endothelial	Pericyte_Endothelial	Pri_Recurrence_after_TMZ	1p_19q_codeleted	CNA_Group_ 2	7.4261268950473504E-3	-1.2916187096014799E-2	S
A_ATGCCGGTTGATGGGA-1	1	KM4242_01	3	Primary	3 --> 3	Oligodendrocyte_like_tumor	NA	Pri_Recurrence_after_TMZ	1p_19q_codeleted	CNA_Group_ 2	-1.68443217246107E-2	5.3371478305996999E-2	G2M
A_ATGCGACAGTCCCATT-1	1	KM4242_01	3	Primary	3 --> 3	Oligodendrocyte_like_tumor	NA	Pri_Recurrence_after_TMZ	1p_19q_codeleted	CNA_Group_ 3	-2.1725410959983701E-2	1.2716401134196699E-2	G2M
A_ATGCTCAGTGTTGCAT-1	1	KM4242_01	3	Primary	3 --> 3	Oligodendrocyte_like_tumor	G3	Pri_Recurrence_after_TMZ	1p_19q_codeleted	CNA_Group_ 3	1.9221886455048601E-3	-4.05256951988794E-2	S
A_ATGCTCTGGCGCGGTA-1	3	KM4242_01	3	Primary	3 --> 3	RBCs	RBCs	Pri_Recurrence_after_TMZ	1p_19q_codeleted	CNA_Group_ 2	4.21027430722632E-2	-1.9195074935184599E-2	S
A_ATGGAGCAGGCCGTGA-1	0	KM4242_01	3	Primary	3 --> 3	Proneural_OPC_like_tumor	NA	Pri_Recurrence_after_TMZ	1p_19q_codeleted	CNA_Group_ 1	-6.4907918828582102E-3	-4.41700061031381E-2	G1
A_ATGGATCCGGCGTCCG-1	1	KM4242_01	3	Primary	3 --> 3	Oligodendrocyte_like_tumor	NA	Pri_Recurrence_after_TMZ	1p_19q_codeleted	CNA_Group_ 2	5.7066826188949003E-2	-4.2572918516313202E-2	S
A_ATGGATTGACCAAACG-1	1	KM4242_01	3	Primary	3 --> 3	Oligodendrocyte_like_tumor	NA	Pri_Recurrence_after_TMZ	1p_19q_codeleted	CNA_Group_ 1	-1.3115961378403001E-2	1.8341368036899099E-2	G2M
A_ATGGCAGCCGAGAAAC-1	5	KM4242_01	3	Primary	3 --> 3	NPC_like_and_DNA_damage	G3	Pri_Recurrence_after_TMZ	1p_19q_codeleted	CNA_Group_ 3	-1.5256069779996399E-3	1.6946231218165402E-2	G2M
A_ATGGTCGCGTGGTTTC-1	1	KM4242_01	3	Primary	3 --> 3	Oligodendrocyte_like_tumor	NA	Pri_Recurrence_after_TMZ	1p_19q_codeleted	CNA_Group_ 1	4.6805656048916497E-2	-1.9453915030118001E-2	S
A_ATGTACGATGACGTCG-1	0	KM4242_01	3	Primary	3 --> 3	Proneural_OPC_like_tumor	G3	Pri_Recurrence_after_TMZ	1p_19q_codeleted	CNA_Group_ 1	1.9667710089683599E-2	-2.2144302816779898E-2	S
A_ATGTAGCGCGCGTAGG-1	0	KM4242_01	3	Primary	3 --> 3	Proneural_OPC_like_tumor	G3	Pri_Recurrence_after_TMZ	1p_19q_codeleted	CNA_Group_ 1	6.5496545940166601E-2	-6.4948274864674693E-2	S
A_ATGTGCATCCGACGCA-1	2	KM4242_01	3	Primary	3 --> 3	NPC_like_tumor	Neurons	Pri_Recurrence_after_TMZ	non_tumor	NA	3.6633426881057399E-3	-3.5785339693725299E-2	S
A_ATGTGGACATCTTGAT-1	6	KM4242_01	3	Primary	3 --> 3	IEG	G3	Pri_Recurrence_after_TMZ	1p_19q_codeleted	CNA_Group_ 1	-1.0886997085088599E-3	6.3939285413201596E-2	G2M
A_ATGTTCGTCGACCCAC-1	0	KM4242_01	3	Primary	3 --> 3	Proneural_OPC_like_tumor	G3	Pri_Recurrence_after_TMZ	1p_19q_codeleted	CNA_Group_ 1	2.3204688622960001E-2	-2.3676587596935E-2	S
A_ATGTTGATTAGAGACT-1	0	KM4242_01	3	Primary	3 --> 3	Proneural_OPC_like_tumor	G3	Pri_Recurrence_after_TMZ	1p_19q_codeleted	CNA_Group_ 1	9.0445811808377699E-2	-1.7755742633890601E-2	S
A_ATTAAACATGCGGACC-1	0	KM4242_01	3	Primary	3 --> 3	Proneural_OPC_like_tumor	G3	Pri_Recurrence_after_TMZ	1p_19q_codeleted	CNA_Group_ 1	7.1531420805583598E-2	3.6235576321326901E-2	S
A_ATTAATACTACGCGGG-1	7	KM4242_01	3	Primary	3 --> 3	Cortical_neurons_and_tumor_cells	Cortical_neurons_and_tumor_cells	Pri_Recurrence_after_TMZ	1p_19q_codeleted	CNA_Group_ 3	6.2076105825653601E-2	-2.9496395556704198E-2	S
A_ATTAATGAACCAGTCG-1	1	KM4242_01	3	Primary	3 --> 3	Oligodendrocyte_like_tumor	NA	Pri_Recurrence_after_TMZ	1p_19q_codeleted	CNA_Group_ 4	2.9866868022386799E-2	-4.2405511261234798E-2	S
A_ATTAATTCGGTCACTC-1	1	KM4242_01	3	Primary	3 --> 3	Oligodendrocyte_like_tumor	NA	Pri_Recurrence_after_TMZ	1p_19q_codeleted	CNA_Group_ 2	2.0851882032007E-2	2.6077369845975501E-2	G2M
A_ATTACGCGCTGGCAGG-1	2	KM4242_01	3	Primary	3 --> 3	NPC_like_tumor	G3	Pri_Recurrence_after_TMZ	non_tumor	NA	3.5859360038079699E-2	-1.22456412415482E-2	S
A_ATTACTAGCCTCTTGC-1	0	KM4242_01	3	Primary	3 --> 3	Proneural_OPC_like_tumor	NA	Pri_Recurrence_after_TMZ	1p_19q_codeleted	CNA_Group_ 1	-2.95392164747138E-2	2.0175886612652801E-2	G2M
A_ATTAGATTGATAGCGG-1	1	KM4242_01	3	Primary	3 --> 3	Oligodendrocyte_like_tumor	NA	Pri_Recurrence_after_TMZ	1p_19q_codeleted	CNA_Group_ 2	-1.23332202821359E-2	-3.8428682613663903E-2	G1
A_ATTAGGCGATGCTTTC-1	0	KM4242_01	3	Primary	3 --> 3	Proneural_OPC_like_tumor	NA	Pri_Recurrence_after_TMZ	1p_19q_codeleted	CNA_Group_ 1	0.156736241666485	8.8711327098691797E-2	S
A_ATTATACTTTGCTCGT-1	1	KM4242_01	3	Primary	3 --> 3	Oligodendrocyte_like_tumor	NA	Pri_Recurrence_after_TMZ	1p_19q_codeleted	CNA_Group_ 4	1.4757506973293699E-2	1.4157508764186999E-2	S
A_ATTATGCCATAGGGAG-1	1	KM4242_01	3	Primary	3 --> 3	Oligodendrocyte_like_tumor	NA	Pri_Recurrence_after_TMZ	1p_19q_codeleted	CNA_Group_ 2	6.5183549801694399E-2	-1.55795670353568E-2	S
A_ATTCACTGATGTTGGA-1	0	KM4242_01	3	Primary	3 --> 3	Proneural_OPC_like_tumor	G3	Pri_Recurrence_after_TMZ	1p_19q_codeleted	CNA_Group_ 1	8.5891286507936204E-2	-7.2203452284842597E-3	S
A_ATTCAGTAGCAGGGTC-1	4	KM4242_01	3	Primary	3 --> 3	Pericyte_Endothelial	Pericyte_Endothelial	Pri_Recurrence_after_TMZ	1p_19q_codeleted	CNA_Group_ 3	2.77800409261557E-2	8.6108883619094995E-3	S
A_ATTCATATACTGTCCA-1	0	KM4242_01	3	Primary	3 --> 3	Proneural_OPC_like_tumor	G3	Pri_Recurrence_after_TMZ	1p_19q_codeleted	CNA_Group_ 2	-5.8176256004504302E-2	-2.4719408370671801E-2	G1
A_ATTCATCGTTGAGGCA-1	0	KM4242_01	3	Primary	3 --> 3	Proneural_OPC_like_tumor	G3	Pri_Recurrence_after_TMZ	1p_19q_codeleted	CNA_Group_ 1	9.6870125630159801E-2	1.4226324044422201E-2	S
A_ATTCCCACATAAACAA-1	0	KM4242_01	3	Primary	3 --> 3	Proneural_OPC_like_tumor	G3	Pri_Recurrence_after_TMZ	1p_19q_codeleted	CNA_Group_ 1	2.2365865954927899E-2	8.2858998254498606E-2	G2M
A_ATTCCTCCGCCAGTGC-1	0	KM4242_01	3	Primary	3 --> 3	Proneural_OPC_like_tumor	G3	Pri_Recurrence_after_TMZ	1p_19q_codeleted	CNA_Group_ 1	0.103666048427831	2.1960751132736201E-2	S
A_ATTCGACGCCGGGCCT-1	0	KM4242_01	3	Primary	3 --> 3	Proneural_OPC_like_tumor	G3	Pri_Recurrence_after_TMZ	1p_19q_codeleted	CNA_Group_ 1	5.3534814269215802E-2	-1.4667934768730399E-2	S
A_ATTGAAGATCTTAGTG-1	0	KM4242_01	3	Primary	3 --> 3	Proneural_OPC_like_tumor	G3	Pri_Recurrence_after_TMZ	1p_19q_codeleted	CNA_Group_ 2	-1.48687074627984E-2	4.3361893768472701E-2	G2M
A_ATTGCCTTTATGTTTG-1	0	KM4242_01	3	Primary	3 --> 3	Proneural_OPC_like_tumor	G3	Pri_Recurrence_after_TMZ	1p_19q_codeleted	CNA_Group_ 1	3.6295142713588899E-2	-7.3629437593893496E-2	S
A_ATTGCTGCTCCTCCAT-1	0	KM4242_01	3	Primary	3 --> 3	Proneural_OPC_like_tumor	G3	Pri_Recurrence_after_TMZ	1p_19q_codeleted	CNA_Group_ 1	1.2787260607551299E-2	2.7174885165026598E-4	S
A_ATTTAACTCGTATTAC-1	1	KM4242_01	3	Primary	3 --> 3	Oligodendrocyte_like_tumor	NA	Pri_Recurrence_after_TMZ	1p_19q_codeleted	CNA_Group_ 3	-1.48863620524481E-2	-2.11293986070447E-2	G1
A_ATTTACAGTTTACTGG-1	0	KM4242_01	3	Primary	3 --> 3	Proneural_OPC_like_tumor	G3	Pri_Recurrence_after_TMZ	1p_19q_codeleted	CNA_Group_ 1	-4.8071525273509497E-2	-6.9539740545043194E-2	G1
A_ATTTGTCTTGGGAGCT-1	1	KM4242_01	3	Primary	3 --> 3	Oligodendrocyte_like_tumor	NA	Pri_Recurrence_after_TMZ	1p_19q_codeleted	CNA_Group_ 2	9.2695289323190197E-3	1.45761942496148E-2	G2M
A_ATTTGTTCCAGGGCTC-1	1	KM4242_01	3	Primary	3 --> 3	Oligodendrocyte_like_tumor	NA	Pri_Recurrence_after_TMZ	1p_19q_codeleted	CNA_Group_ 2	2.0991611004778001E-2	-5.5757715136230797E-2	S
A_CAAACGAGTATCGCAG-1	0	KM4242_01	3	Primary	3 --> 3	Proneural_OPC_like_tumor	G3	Pri_Recurrence_after_TMZ	1p_19q_codeleted	CNA_Group_ 1	0.112321633465904	-2.4312427448888601E-2	S
A_CAAACGGTCGCACTTT-1	0	KM4242_01	3	Primary	3 --> 3	Proneural_OPC_like_tumor	G3	Pri_Recurrence_after_TMZ	1p_19q_codeleted	CNA_Group_ 2	-3.30811258673872E-2	-3.9466357263020301E-2	G1
A_CAAATGTCCTTCCGTG-1	0	KM4242_01	3	Primary	3 --> 3	Proneural_OPC_like_tumor	G3	Pri_Recurrence_after_TMZ	1p_19q_codeleted	CNA_Group_ 1	5.3761913383523298E-2	-4.3205507569591302E-2	S
A_CAACGACCCGTTTACA-1	0	KM4242_01	3	Primary	3 --> 3	Proneural_OPC_like_tumor	NA	Pri_Recurrence_after_TMZ	1p_19q_codeleted	CNA_Group_ 2	-2.6534492593470699E-2	2.08311017733715E-2	G2M
A_CAACGGTTCTTGATAC-1	0	KM4242_01	3	Primary	3 --> 3	Proneural_OPC_like_tumor	G3	Pri_Recurrence_after_TMZ	1p_19q_codeleted	CNA_Group_ 3	-7.9672042351820703E-3	8.8890883418649806E-3	G2M
A_CAACTATATCGAATGC-1	1	KM4242_01	3	Primary	3 --> 3	Oligodendrocyte_like_tumor	NA	Pri_Recurrence_after_TMZ	1p_19q_codeleted	CNA_Group_ 3	-4.4089506210865201E-2	-6.5607885103671102E-3	G1
A_CAACTCCTTGATCCCG-1	1	KM4242_01	3	Primary	3 --> 3	Oligodendrocyte_like_tumor	NA	Pri_Recurrence_after_TMZ	1p_19q_codeleted	CNA_Group_ 1	-5.6392772945185701E-2	-2.20170320394639E-2	G1
A_CAACTGCTCATCCGAT-1	0	KM4242_01	3	Primary	3 --> 3	Proneural_OPC_like_tumor	G3	Pri_Recurrence_after_TMZ	1p_19q_codeleted	CNA_Group_ 2	2.71794486465173E-2	-3.2397799207389097E-2	S
A_CAAGAGGGCGGAGTAC-1	0	KM4242_01	3	Primary	3 --> 3	Proneural_OPC_like_tumor	G3	Pri_Recurrence_after_TMZ	1p_19q_codeleted	CNA_Group_ 1	3.8524738203754703E-2	-1.1319848894997901E-2	S
A_CAAGCAACGTCGGAGT-1	0	KM4242_01	3	Primary	3 --> 3	Proneural_OPC_like_tumor	G3	Pri_Recurrence_after_TMZ	1p_19q_codeleted	CNA_Group_ 1	5.38981709611231E-2	-5.8950170086526199E-2	S
A_CAAGCACCAAATGCCT-1	1	KM4242_01	3	Primary	3 --> 3	Oligodendrocyte_like_tumor	NA	Pri_Recurrence_after_TMZ	1p_19q_codeleted	CNA_Group_ 3	-1.1636496026036801E-2	-7.5972964973600602E-3	G1
A_CAAGCGGCACATAATT-1	4	KM4242_01	3	Primary	3 --> 3	Pericyte_Endothelial	Pericyte_Endothelial	Pri_Recurrence_after_TMZ	1p_19q_codeleted	CNA_Group_ 1	1.06869986267542E-2	-1.16230909400035E-2	S
A_CAAGGATCGCATGTTC-1	0	KM4242_01	3	Primary	3 --> 3	Proneural_OPC_like_tumor	NA	Pri_Recurrence_after_TMZ	1p_19q_codeleted	CNA_Group_ 1	8.5956464033893398E-2	4.8934896725803E-2	S
A_CAATAAACCTTGGCCC-1	7	KM4242_01	3	Primary	3 --> 3	Cortical_neurons_and_tumor_cells	Cortical_neurons_and_tumor_cells	Pri_Recurrence_after_TMZ	non_tumor	CNA_Group_ 2	-3.9106690548004197E-2	1.6546548394460001E-2	G2M
A_CAATGCGAGAAGTATC-1	6	KM4242_01	3	Primary	3 --> 3	IEG	G3	Pri_Recurrence_after_TMZ	1p_19q_codeleted	CNA_Group_ 1	-1.2025635766215201E-3	2.85977514520557E-2	G2M
A_CAATGGATCTCTACCA-1	4	KM4242_01	3	Primary	3 --> 3	Pericyte_Endothelial	Pericyte_Endothelial	Pri_Recurrence_after_TMZ	1p_19q_codeleted	CNA_Group_ 2	-4.0190009163979502E-2	-6.6586819308974299E-3	G1
A_CAATTAAGGGTGATGA-1	1	KM4242_01	3	Primary	3 --> 3	Oligodendrocyte_like_tumor	NA	Pri_Recurrence_after_TMZ	1p_19q_codeleted	CNA_Group_ 3	2.2926373993510999E-2	-1.52297535253245E-2	S
A_CAATTTCGTATAAGGG-1	4	KM4242_01	3	Primary	3 --> 3	Pericyte_Endothelial	Pericyte_Endothelial	Pri_Recurrence_after_TMZ	1p_19q_codeleted	CNA_Group_ 1	0.106435648592263	2.4305980076498701E-2	S
A_CACAATGAGCTGCTAT-1	0	KM4242_01	3	Primary	3 --> 3	Proneural_OPC_like_tumor	G3	Pri_Recurrence_after_TMZ	1p_19q_codeleted	CNA_Group_ 2	-7.7792867229454403E-3	-2.3916818592074399E-2	G1
A_CACACAGGGATAGATT-1	4	KM4242_01	3	Primary	3 --> 3	Pericyte_Endothelial	Pericyte_Endothelial	Pri_Recurrence_after_TMZ	1p_19q_codeleted	CNA_Group_ 1	-5.10570084524367E-2	1.96393899923001E-2	G2M
A_CACACGCGCTGTCTTA-1	1	KM4242_01	3	Primary	3 --> 3	Oligodendrocyte_like_tumor	NA	Pri_Recurrence_after_TMZ	1p_19q_codeleted	CNA_Group_ 2	-1.30542358416839E-2	-1.3815734391231901E-2	G1
A_CACAGCACCCACGGCA-1	0	KM4242_01	3	Primary	3 --> 3	Proneural_OPC_like_tumor	NA	Pri_Recurrence_after_TMZ	1p_19q_codeleted	CNA_Group_ 3	9.4575788571059902E-2	9.7396331335892095E-2	G2M
A_CACAGCTAGGGAGTGA-1	1	KM4242_01	3	Primary	3 --> 3	Oligodendrocyte_like_tumor	NA	Pri_Recurrence_after_TMZ	1p_19q_codeleted	CNA_Group_ 2	7.6158858606768895E-2	-6.713194882784E-3	S
A_CACAGGGCCGTTGTCA-1	0	KM4242_01	3	Primary	3 --> 3	Proneural_OPC_like_tumor	G3	Pri_Recurrence_after_TMZ	1p_19q_codeleted	CNA_Group_ 2	-2.4624950403092798E-2	1.6928162465764701E-2	G2M
A_CACATATTAGCAGGAT-1	6	KM4242_01	3	Primary	3 --> 3	IEG	G3	Pri_Recurrence_after_TMZ	1p_19q_codeleted	CNA_Group_ 1	2.7560249533557599E-2	-3.0105279757677499E-2	S
A_CACATCTCACCGACGA-1	0	KM4242_01	3	Primary	3 --> 3	Proneural_OPC_like_tumor	G3	Pri_Recurrence_after_TMZ	1p_19q_codeleted	CNA_Group_ 2	-3.9916625051840599E-2	4.1876950672808701E-2	G2M
A_CACATGATTCAGCAAC-1	0	KM4242_01	3	Primary	3 --> 3	Proneural_OPC_like_tumor	G3	Pri_Recurrence_after_TMZ	1p_19q_codeleted	CNA_Group_ 1	2.7919841883337199E-2	3.16097175673902E-2	G2M
A_CACATTCTTTCGATGG-1	1	KM4242_01	3	Primary	3 --> 3	Oligodendrocyte_like_tumor	NA	Pri_Recurrence_after_TMZ	1p_19q_codeleted	CNA_Group_ 3	-3.0851728259096101E-2	1.45336507279261E-2	G2M
A_CACCCACACGTCACCC-1	1	KM4242_01	3	Primary	3 --> 3	Oligodendrocyte_like_tumor	NA	Pri_Recurrence_after_TMZ	1p_19q_codeleted	CNA_Group_ 1	-7.0618630070129695E-2	8.6566336708766801E-4	G2M
A_CACCCACGAGGCAATT-1	1	KM4242_01	3	Primary	3 --> 3	Oligodendrocyte_like_tumor	NA	Pri_Recurrence_after_TMZ	1p_19q_codeleted	CNA_Group_ 2	-5.96684739479783E-2	2.60094557113466E-2	G2M
A_CACCCTAACAAGATCT-1	0	KM4242_01	3	Primary	3 --> 3	Proneural_OPC_like_tumor	G3	Pri_Recurrence_after_TMZ	1p_19q_codeleted	CNA_Group_ 1	2.4278198299803998E-2	-2.1555035770779801E-2	S
A_CACCGCCAGAAGGTTT-1	7	KM4242_01	3	Primary	3 --> 3	Cortical_neurons_and_tumor_cells	Cortical_neurons_and_tumor_cells	Pri_Recurrence_after_TMZ	1p_19q_codeleted	CNA_Group_ 1	6.6357313097564805E-2	9.4934090423041795E-2	G2M
A_CACCTAATCAGTTTAC-1	1	KM4242_01	3	Primary	3 --> 3	Oligodendrocyte_like_tumor	NA	Pri_Recurrence_after_TMZ	1p_19q_codeleted	CNA_Group_ 3	-1.09325786601448E-2	7.1870585773296802E-2	G2M
A_CACCTCGATGGTGGAC-1	1	KM4242_01	3	Primary	3 --> 3	Oligodendrocyte_like_tumor	NA	Pri_Recurrence_after_TMZ	1p_19q_codeleted	CNA_Group_ 2	1.3496971479736801E-2	-2.3555734630316599E-2	S
A_CACCTTGCGAAACTCG-1	1	KM4242_01	3	Primary	3 --> 3	Oligodendrocyte_like_tumor	NA	Pri_Recurrence_after_TMZ	1p_19q_codeleted	CNA_Group_ 3	-1.1297928560886201E-2	-4.6970598890414697E-3	G1
A_CACGAAAGTTAGTCCC-1	5	KM4242_01	3	Primary	3 --> 3	NPC_like_and_DNA_damage	G3	Pri_Recurrence_after_TMZ	1p_19q_codeleted	CNA_Group_ 1	0.14884678408350799	-2.1030646661426799E-2	S
A_CACGCACAGCGCAGCT-1	1	KM4242_01	3	Primary	3 --> 3	Oligodendrocyte_like_tumor	NA	Pri_Recurrence_after_TMZ	1p_19q_codeleted	CNA_Group_ 3	1.9540213535547998E-3	4.5321521322237102E-2	G2M
A_CACGCAGCGAGGCTTT-1	0	KM4242_01	3	Primary	3 --> 3	Proneural_OPC_like_tumor	G3	Pri_Recurrence_after_TMZ	1p_19q_codeleted	CNA_Group_ 1	7.5355870876290407E-2	7.6909434042046797E-3	S
A_CACGGGATTGAGGGTT-1	4	KM4242_01	3	Primary	3 --> 3	Pericyte_Endothelial	Pericyte_Endothelial	Pri_Recurrence_after_TMZ	1p_19q_codeleted	CNA_Group_ 2	-4.49182210248536E-2	-3.4301852968394102E-2	G1
A_CACGTCGGCAACCTCT-1	0	KM4242_01	3	Primary	3 --> 3	Proneural_OPC_like_tumor	G3	Pri_Recurrence_after_TMZ	1p_19q_codeleted	CNA_Group_ 1	4.4154814656662399E-2	-1.6722283900790801E-2	S
A_CACGTTCGTGCTCTAG-1	1	KM4242_01	3	Primary	3 --> 3	Oligodendrocyte_like_tumor	NA	Pri_Recurrence_after_TMZ	1p_19q_codeleted	CNA_Group_ 3	6.54964299608864E-3	-4.4171807490228199E-2	S
A_CACTAAAGTTGCCTAT-1	0	KM4242_01	3	Primary	3 --> 3	Proneural_OPC_like_tumor	G3	Pri_Recurrence_after_TMZ	1p_19q_codeleted	CNA_Group_ 2	5.3117926140230698E-2	-2.34099915943373E-2	S
A_CACTCAAGAGCTATGG-1	4	KM4242_01	3	Primary	3 --> 3	Pericyte_Endothelial	Pericyte_Endothelial	Pri_Recurrence_after_TMZ	1p_19q_codeleted	CNA_Group_ 1	-3.2188573679217097E-2	-2.1889543006127402E-2	G1
A_CACTCGAGCTGAACAA-1	0	KM4242_01	3	Primary	3 --> 3	Proneural_OPC_like_tumor	G3	Pri_Recurrence_after_TMZ	1p_19q_codeleted	CNA_Group_ 1	-2.63506676751757E-3	-3.6824462122313099E-2	G1
A_CACTCGGTTAGGAGGA-1	5	KM4242_01	3	Primary	3 --> 3	NPC_like_and_DNA_damage	G3	Pri_Recurrence_after_TMZ	1p_19q_codeleted	CNA_Group_ 1	7.4821001286796293E-2	-3.0046764490634301E-2	S
A_CACTGTCCAAGTGAGA-1	0	KM4242_01	3	Primary	3 --> 3	Proneural_OPC_like_tumor	NA	Pri_Recurrence_after_TMZ	1p_19q_codeleted	CNA_Group_ 3	7.3880712415397298E-4	-5.0172858519558897E-2	S
A_CACTTAATCAGACGGA-1	0	KM4242_01	3	Primary	3 --> 3	Proneural_OPC_like_tumor	G3	Pri_Recurrence_after_TMZ	1p_19q_codeleted	CNA_Group_ 1	-8.5711308678812492E-3	3.17537791658489E-2	G2M
A_CACTTCGCCACAGGCT-1	1	KM4242_01	3	Primary	3 --> 3	Oligodendrocyte_like_tumor	G3	Pri_Recurrence_after_TMZ	1p_19q_codeleted	CNA_Group_ 3	9.1239373039522204E-2	8.5562283293867097E-3	S
A_CAGAACTTAGCCCTCT-1	0	KM4242_01	3	Primary	3 --> 3	Proneural_OPC_like_tumor	NA	Pri_Recurrence_after_TMZ	1p_19q_codeleted	CNA_Group_ 1	-6.9292018072845702E-3	3.0367883645362201E-3	G2M
A_CAGACACCGATCGCTG-1	5	KM4242_01	3	Primary	3 --> 3	NPC_like_and_DNA_damage	G3	Pri_Recurrence_after_TMZ	non_tumor	CNA_Group_ 2	8.0845260939464893E-3	-2.1508286768766999E-2	S
A_CAGACGAACCTGATAC-1	5	KM4242_01	3	Primary	3 --> 3	NPC_like_and_DNA_damage	G3	Pri_Recurrence_after_TMZ	1p_19q_codeleted	CNA_Group_ 1	4.4298505524762097E-2	6.2814812491236204E-3	S
A_CAGAGACGGTCACCCA-1	0	KM4242_01	3	Primary	3 --> 3	Proneural_OPC_like_tumor	G3	Pri_Recurrence_after_TMZ	1p_19q_codeleted	CNA_Group_ 2	6.5102834975172899E-2	-4.2750059037610602E-2	S
A_CAGAGCATGAGCTTGC-1	1	KM4242_01	3	Primary	3 --> 3	Oligodendrocyte_like_tumor	NA	Pri_Recurrence_after_TMZ	1p_19q_codeleted	CNA_Group_ 2	-3.0872219311956401E-2	3.1026134059785802E-2	G2M
A_CAGAGGCGATGCATGA-1	0	KM4242_01	3	Primary	3 --> 3	Proneural_OPC_like_tumor	G3	Pri_Recurrence_after_TMZ	1p_19q_codeleted	CNA_Group_ 1	2.8241760690733701E-2	-5.1383148976602497E-2	S
A_CAGATACTAACATAGT-1	0	KM4242_01	3	Primary	3 --> 3	Proneural_OPC_like_tumor	G3	Pri_Recurrence_after_TMZ	1p_19q_codeleted	CNA_Group_ 1	-7.9534518679069705E-3	-1.8673095692546701E-2	G1
A_CAGCAGCCCGTTCCTT-1	1	KM4242_01	3	Primary	3 --> 3	Oligodendrocyte_like_tumor	NA	Pri_Recurrence_after_TMZ	1p_19q_codeleted	CNA_Group_ 2	-2.0383305074072301E-2	-4.2696318127025797E-2	G1
A_CAGCAGTCTGTGCTGC-1	0	KM4242_01	3	Primary	3 --> 3	Proneural_OPC_like_tumor	G3	Pri_Recurrence_after_TMZ	1p_19q_codeleted	CNA_Group_ 2	5.9232279695794199E-2	2.92638462048616E-2	S
A_CAGCCTCCTGCAGAGG-1	1	KM4242_01	3	Primary	3 --> 3	Oligodendrocyte_like_tumor	NA	Pri_Recurrence_after_TMZ	1p_19q_codeleted	CNA_Group_ 2	2.33102699916535E-2	3.2462889386325203E-2	G2M
A_CAGCTCACTGAGACAT-1	0	KM4242_01	3	Primary	3 --> 3	Proneural_OPC_like_tumor	NA	Pri_Recurrence_after_TMZ	1p_19q_codeleted	CNA_Group_ 1	0.176201129199102	-1.9543664792484299E-2	S
A_CAGCTCGACAAGTTAA-1	1	KM4242_01	3	Primary	3 --> 3	Oligodendrocyte_like_tumor	NA	Pri_Recurrence_after_TMZ	1p_19q_codeleted	CNA_Group_ 3	-3.9108048979192199E-2	7.0703054875389196E-3	G2M
A_CAGCTTAGTAGGTAGC-1	4	KM4242_01	3	Primary	3 --> 3	Pericyte_Endothelial	Pericyte_Endothelial	Pri_Recurrence_after_TMZ	1p_19q_codeleted	CNA_Group_ 3	-0.102522245224462	-4.8126405936664E-2	G1
A_CAGGATATATCGTTGT-1	0	KM4242_01	3	Primary	3 --> 3	Proneural_OPC_like_tumor	G3	Pri_Recurrence_after_TMZ	1p_19q_codeleted	CNA_Group_ 1	2.5843578379650501E-2	-2.1307455049246901E-2	S
A_CAGGCAGTCTTACCAG-1	0	KM4242_01	3	Primary	3 --> 3	Proneural_OPC_like_tumor	G3	Pri_Recurrence_after_TMZ	1p_19q_codeleted	CNA_Group_ 1	0.121999475543537	-1.24613551089982E-2	S
A_CAGGCCGTTTGGGTGT-1	5	KM4242_01	3	Primary	3 --> 3	NPC_like_and_DNA_damage	G3	Pri_Recurrence_after_TMZ	1p_19q_codeleted	CNA_Group_ 1	7.7465444181301094E-2	-5.4901179694839902E-2	S
A_CAGGCGCCATGCTAGG-1	0	KM4242_01	3	Primary	3 --> 3	Proneural_OPC_like_tumor	G3	Pri_Recurrence_after_TMZ	1p_19q_codeleted	CNA_Group_ 4	2.18249400201775E-2	6.8557159374647196E-3	S
A_CAGTAATCCCTCCCAG-1	0	KM4242_01	3	Primary	3 --> 3	Proneural_OPC_like_tumor	G3	Pri_Recurrence_after_TMZ	1p_19q_codeleted	CNA_Group_ 3	8.1403799842334305E-3	-4.5478356665022E-2	S
A_CAGTAGCCCACGCGGT-1	1	KM4242_01	3	Primary	3 --> 3	Oligodendrocyte_like_tumor	NA	Pri_Recurrence_after_TMZ	1p_19q_codeleted	CNA_Group_ 2	3.5740124565770298E-4	-6.0475173114095601E-2	S
A_CAGTCTGTATACTGGG-1	0	KM4242_01	3	Primary	3 --> 3	Proneural_OPC_like_tumor	G3	Pri_Recurrence_after_TMZ	1p_19q_codeleted	CNA_Group_ 1	-2.52135785210626E-2	2.5576786538988299E-2	G2M
A_CAGTGAATAAATGACT-1	1	KM4242_01	3	Primary	3 --> 3	Oligodendrocyte_like_tumor	NA	Pri_Recurrence_after_TMZ	1p_19q_codeleted	CNA_Group_ 3	1.7293993930123399E-2	-7.6392191859604702E-3	S
A_CAGTTCAAATTGACAC-1	0	KM4242_01	3	Primary	3 --> 3	Proneural_OPC_like_tumor	G3	Pri_Recurrence_after_TMZ	1p_19q_codeleted	CNA_Group_ 1	4.6502551562389999E-3	-1.3897544742484899E-2	S
A_CAGTTCCGCGGGTCGA-1	0	KM4242_01	3	Primary	3 --> 3	Proneural_OPC_like_tumor	G3	Pri_Recurrence_after_TMZ	1p_19q_codeleted	CNA_Group_ 3	-5.24225139797308E-2	-1.35907223295377E-2	G1
A_CATAAGAAGCTTGGCT-1	3	KM4242_01	3	Primary	3 --> 3	RBCs	RBCs	Pri_Recurrence_after_TMZ	1p_19q_codeleted	CNA_Group_ 3	-4.7205219945834903E-3	-1.3871748538334699E-2	G1
A_CATACACGGTTCCCAC-1	0	KM4242_01	3	Primary	3 --> 3	Proneural_OPC_like_tumor	G3	Pri_Recurrence_after_TMZ	1p_19q_codeleted	CNA_Group_ 1	4.1692483268872101E-2	9.1680010856950999E-4	S
A_CATACCCGTACCCAGT-1	0	KM4242_01	3	Primary	3 --> 3	Proneural_OPC_like_tumor	G3	Pri_Recurrence_after_TMZ	1p_19q_codeleted	CNA_Group_ 1	7.6104828153320203E-2	-3.2945094212503398E-2	S
A_CATACGGCGTCTGGGC-1	0	KM4242_01	3	Primary	3 --> 3	Proneural_OPC_like_tumor	G3	Pri_Recurrence_after_TMZ	1p_19q_codeleted	CNA_Group_ 1	-3.3191004055394602E-2	2.0747183174377498E-3	G2M
A_CATACTATGTAATTGT-1	0	KM4242_01	3	Primary	3 --> 3	Proneural_OPC_like_tumor	G3	Pri_Recurrence_after_TMZ	1p_19q_codeleted	CNA_Group_ 2	-1.63320497413053E-2	-1.12863332406236E-3	G1
A_CATAGAGGAGATACTA-1	0	KM4242_01	3	Primary	3 --> 3	Proneural_OPC_like_tumor	G3	Pri_Recurrence_after_TMZ	1p_19q_codeleted	CNA_Group_ 1	-5.4864384114264302E-2	-4.6422805206767096E-3	G1
A_CATAGCCGCCCGGGAT-1	4	KM4242_01	3	Primary	3 --> 3	Pericyte_Endothelial	Pericyte_Endothelial	Pri_Recurrence_after_TMZ	1p_19q_codeleted	CNA_Group_ 3	5.3798071959514401E-2	6.6969759497910904E-3	S
A_CATAGTACATTGAGAG-1	1	KM4242_01	3	Primary	3 --> 3	Oligodendrocyte_like_tumor	NA	Pri_Recurrence_after_TMZ	1p_19q_codeleted	CNA_Group_ 3	5.35343660007363E-2	1.47374961920293E-2	S
A_CATAGTAGCATAGTAG-1	0	KM4242_01	3	Primary	3 --> 3	Proneural_OPC_like_tumor	NA	Pri_Recurrence_after_TMZ	1p_19q_codeleted	CNA_Group_ 1	-5.43093441867884E-4	3.1568830900968597E-2	G2M
A_CATAGTCCACAAGAAC-1	0	KM4242_01	3	Primary	3 --> 3	Proneural_OPC_like_tumor	G3	Pri_Recurrence_after_TMZ	1p_19q_codeleted	CNA_Group_ 1	0.10049966794963	-2.79966404203736E-2	S
A_CATATAGGTACAGTCA-1	0	KM4242_01	3	Primary	3 --> 3	Proneural_OPC_like_tumor	G3	Pri_Recurrence_after_TMZ	1p_19q_codeleted	CNA_Group_ 1	-1.85628180922408E-2	3.1456000212673703E-2	G2M
A_CATCGGACGGGTTAAT-1	0	KM4242_01	3	Primary	3 --> 3	Proneural_OPC_like_tumor	G3	Pri_Recurrence_after_TMZ	1p_19q_codeleted	CNA_Group_ 1	5.68260995251808E-2	-6.1785172271333302E-2	S
A_CATGAGATGCACTCTC-1	0	KM4242_01	3	Primary	3 --> 3	Proneural_OPC_like_tumor	G3	Pri_Recurrence_after_TMZ	1p_19q_codeleted	CNA_Group_ 3	1.05996356668548E-2	-3.3554703329674203E-2	S
A_CATGATGCACAATTCT-1	1	KM4242_01	3	Primary	3 --> 3	Oligodendrocyte_like_tumor	NA	Pri_Recurrence_after_TMZ	1p_19q_codeleted	CNA_Group_ 2	-1.7115957542613799E-2	5.0565449313199402E-2	G2M
A_CATGCGTTAGACAGAA-1	1	KM4242_01	3	Primary	3 --> 3	Oligodendrocyte_like_tumor	NA	Pri_Recurrence_after_TMZ	1p_19q_codeleted	CNA_Group_ 2	2.0124104397925401E-2	-6.0225508235402403E-2	S
A_CATGGCAGGAAGATCG-1	1	KM4242_01	3	Primary	3 --> 3	Oligodendrocyte_like_tumor	NA	Pri_Recurrence_after_TMZ	1p_19q_codeleted	CNA_Group_ 3	2.83739616297265E-2	1.1976467657213E-2	S
A_CATGGGTATGCCTTAT-1	0	KM4242_01	3	Primary	3 --> 3	Proneural_OPC_like_tumor	G3	Pri_Recurrence_after_TMZ	1p_19q_codeleted	CNA_Group_ 1	0.12520203940841501	0.104868830072536	S
A_CATGGGTCGGGTGTGG-1	7	KM4242_01	3	Primary	3 --> 3	Cortical_neurons_and_tumor_cells	Cortical_neurons_and_tumor_cells	Pri_Recurrence_after_TMZ	non_tumor	CNA_Group_ 3	3.9808039030423299E-3	-2.3079051826864198E-2	S
A_CATGGTAAGTAGCGTT-1	6	KM4242_01	3	Primary	3 --> 3	IEG	G3	Pri_Recurrence_after_TMZ	1p_19q_codeleted	CNA_Group_ 1	3.9898801615530201E-2	-7.1260761510960405E-2	S
A_CATGGTCTAGATACCG-1	1	KM4242_01	3	Primary	3 --> 3	Oligodendrocyte_like_tumor	NA	Pri_Recurrence_after_TMZ	1p_19q_codeleted	CNA_Group_ 4	-5.4599892810592097E-2	5.7331686861475398E-2	G2M
A_CATGTCTCATTTATGG-1	1	KM4242_01	3	Primary	3 --> 3	Oligodendrocyte_like_tumor	NA	Pri_Recurrence_after_TMZ	1p_19q_codeleted	CNA_Group_ 1	-2.8608722534104701E-3	2.1287033370002002E-2	G2M
A_CATTACGTCGGCCCGT-1	1	KM4242_01	3	Primary	3 --> 3	Oligodendrocyte_like_tumor	NA	Pri_Recurrence_after_TMZ	1p_19q_codeleted	CNA_Group_ 2	1.3032050253427E-2	-3.43240414047086E-2	S
A_CATTATGCTTGTTGTG-1	0	KM4242_01	3	Primary	3 --> 3	Proneural_OPC_like_tumor	NA	Pri_Recurrence_after_TMZ	1p_19q_codeleted	CNA_Group_ 1	6.4645627212158094E-2	-2.5513770832507599E-2	S
A_CATTGCGAAATGGGCG-1	0	KM4242_01	3	Primary	3 --> 3	Proneural_OPC_like_tumor	G3	Pri_Recurrence_after_TMZ	1p_19q_codeleted	CNA_Group_ 1	8.0755335801722603E-2	-3.07043050402739E-3	S
A_CATTTAGCGGACCATG-1	1	KM4242_01	3	Primary	3 --> 3	Oligodendrocyte_like_tumor	NA	Pri_Recurrence_after_TMZ	1p_19q_codeleted	CNA_Group_ 3	-4.2009370472179397E-2	-4.0293103223716202E-2	G1
A_CATTTGAGTGGTACGT-1	0	KM4242_01	3	Primary	3 --> 3	Proneural_OPC_like_tumor	G3	Pri_Recurrence_after_TMZ	1p_19q_codeleted	CNA_Group_ 1	-3.6419594810572102E-2	-3.30447668326651E-2	G1
A_CCAAACAGAACCCTCG-1	0	KM4242_01	3	Primary	3 --> 3	Proneural_OPC_like_tumor	NA	Pri_Recurrence_after_TMZ	1p_19q_codeleted	CNA_Group_ 1	3.8288387780274297E-2	1.5739125935309298E-2	S
A_CCAACGATGCACTGAT-1	0	KM4242_01	3	Primary	3 --> 3	Proneural_OPC_like_tumor	G3	Pri_Recurrence_after_TMZ	1p_19q_codeleted	CNA_Group_ 3	-2.0813115016370402E-2	-2.81385159061334E-2	G1
A_CCAAGAAAGTGGGCGA-1	5	KM4242_01	3	Primary	3 --> 3	NPC_like_and_DNA_damage	G3	Pri_Recurrence_after_TMZ	1p_19q_codeleted	CNA_Group_ 1	3.0367648809163199E-2	-8.2209106508271401E-3	S
A_CCAAGACTTCTGCGAA-1	1	KM4242_01	3	Primary	3 --> 3	Oligodendrocyte_like_tumor	NA	Pri_Recurrence_after_TMZ	1p_19q_codeleted	CNA_Group_ 2	-3.6851516436018E-2	3.3229380968687102E-3	G2M
A_CCAAGCGTAACTCGTA-1	1	KM4242_01	3	Primary	3 --> 3	Oligodendrocyte_like_tumor	NA	Pri_Recurrence_after_TMZ	1p_19q_codeleted	CNA_Group_ 1	3.6825727795225603E-2	9.9980775224354796E-3	S
A_CCAAGGAACAGAGAGG-1	2	KM4242_01	3	Primary	3 --> 3	NPC_like_tumor	Neurons	Pri_Recurrence_after_TMZ	non_tumor	NA	2.13107954616517E-2	2.20287094999417E-2	G2M
A_CCAATAGTGCCGTCGA-1	0	KM4242_01	3	Primary	3 --> 3	Proneural_OPC_like_tumor	G3	Pri_Recurrence_after_TMZ	1p_19q_codeleted	CNA_Group_ 1	-5.98139861472477E-3	-2.6737277439471699E-2	G1
A_CCAATGTCACAGCAAG-1	0	KM4242_01	3	Primary	3 --> 3	Proneural_OPC_like_tumor	G3	Pri_Recurrence_after_TMZ	1p_19q_codeleted	CNA_Group_ 2	2.14584720098565E-2	2.46693930156556E-2	G2M
A_CCAATTGAATGTTAAT-1	0	KM4242_01	3	Primary	3 --> 3	Proneural_OPC_like_tumor	NA	Pri_Recurrence_after_TMZ	1p_19q_codeleted	CNA_Group_ 3	1.4992863776335E-2	2.51018920913753E-2	G2M
A_CCACAATGTACGTCTT-1	1	KM4242_01	3	Primary	3 --> 3	Oligodendrocyte_like_tumor	NA	Pri_Recurrence_after_TMZ	1p_19q_codeleted	CNA_Group_ 3	2.08316838054852E-2	3.1761694502625802E-3	S
A_CCACACTGAGATATTA-1	0	KM4242_01	3	Primary	3 --> 3	Proneural_OPC_like_tumor	G3	Pri_Recurrence_after_TMZ	1p_19q_codeleted	CNA_Group_ 1	-4.5036088202119899E-2	-6.6901025205778897E-4	G1
A_CCACCCAAGGAAAGTG-1	1	KM4242_01	3	Primary	3 --> 3	Oligodendrocyte_like_tumor	NA	Pri_Recurrence_after_TMZ	1p_19q_codeleted	CNA_Group_ 3	4.3769134838336802E-3	1.18324285959633E-2	G2M
A_CCACGAGAAGAGAATC-1	1	KM4242_01	3	Primary	3 --> 3	Oligodendrocyte_like_tumor	NA	Pri_Recurrence_after_TMZ	1p_19q_codeleted	CNA_Group_ 2	-7.3795316498847302E-3	-2.5576463995666099E-2	G1
A_CCACTCAGATCCGCAA-1	0	KM4242_01	3	Primary	3 --> 3	Proneural_OPC_like_tumor	G3	Pri_Recurrence_after_TMZ	1p_19q_codeleted	CNA_Group_ 1	-2.1906858828197099E-2	9.7037506274438596E-3	G2M
A_CCACTGGTGGCTGGTT-1	0	KM4242_01	3	Primary	3 --> 3	Proneural_OPC_like_tumor	G3	Pri_Recurrence_after_TMZ	1p_19q_codeleted	CNA_Group_ 1	-6.0778769347495099E-3	-3.0239324063732701E-2	G1
A_CCAGAGACAAAGCCGG-1	0	KM4242_01	3	Primary	3 --> 3	Proneural_OPC_like_tumor	G3	Pri_Recurrence_after_TMZ	1p_19q_codeleted	CNA_Group_ 3	4.91466191318203E-2	-6.05890439355541E-3	S
A_CCAGATAGTTGAGTGA-1	1	KM4242_01	3	Primary	3 --> 3	Oligodendrocyte_like_tumor	NA	Pri_Recurrence_after_TMZ	1p_19q_codeleted	CNA_Group_ 3	1.8621424974594701E-2	1.2437113107927E-2	S
A_CCAGCCTGGACCAATA-1	0	KM4242_01	3	Primary	3 --> 3	Proneural_OPC_like_tumor	NA	Pri_Recurrence_after_TMZ	1p_19q_codeleted	CNA_Group_ 1	-7.0509287671917699E-3	1.8126016437473901E-3	G2M
A_CCAGCTCGAACGCATT-1	0	KM4242_01	3	Primary	3 --> 3	Proneural_OPC_like_tumor	G3	Pri_Recurrence_after_TMZ	1p_19q_codeleted	CNA_Group_ 2	3.3693519590885797E-2	-7.7961372003848301E-3	S
A_CCAGCTGATGGTACTT-1	0	KM4242_01	3	Primary	3 --> 3	Proneural_OPC_like_tumor	G3	Pri_Recurrence_after_TMZ	1p_19q_codeleted	CNA_Group_ 1	-7.6775982062298798E-2	-6.4242192183333298E-3	G1
A_CCAGCTTCCGCCCGCA-1	2	KM4242_01	3	Primary	3 --> 3	NPC_like_tumor	G3	Pri_Recurrence_after_TMZ	non_tumor	NA	-2.4378059239677501E-2	-6.3283724967591506E-2	G1
A_CCAGGGACGTGGCCTC-1	0	KM4242_01	3	Primary	3 --> 3	Proneural_OPC_like_tumor	NA	Pri_Recurrence_after_TMZ	1p_19q_codeleted	CNA_Group_ 1	2.82768008284714E-2	-3.64812309147068E-2	S
A_CCAGTAGTCTGATCCA-1	1	KM4242_01	3	Primary	3 --> 3	Oligodendrocyte_like_tumor	NA	Pri_Recurrence_after_TMZ	1p_19q_codeleted	CNA_Group_ 3	-9.1395379401773696E-3	-3.3238590469254002E-2	G1
A_CCAGTCTAGACGGCGC-1	1	KM4242_01	3	Primary	3 --> 3	Oligodendrocyte_like_tumor	NA	Pri_Recurrence_after_TMZ	1p_19q_codeleted	CNA_Group_ 3	-5.6831439411945198E-2	1.39157664486744E-4	G2M
A_CCAGTCTTGTCATAGA-1	0	KM4242_01	3	Primary	3 --> 3	Proneural_OPC_like_tumor	G3	Pri_Recurrence_after_TMZ	1p_19q_codeleted	CNA_Group_ 2	4.6937898682044898E-2	-1.20140669701392E-2	S
A_CCATAGGTTGGCGTGG-1	1	KM4242_01	3	Primary	3 --> 3	Oligodendrocyte_like_tumor	NA	Pri_Recurrence_after_TMZ	1p_19q_codeleted	CNA_Group_ 2	-4.0144556356293999E-3	-5.0017285650424501E-2	G1
A_CCATCGCAGTTAAACT-1	0	KM4242_01	3	Primary	3 --> 3	Proneural_OPC_like_tumor	G3	Pri_Recurrence_after_TMZ	1p_19q_codeleted	CNA_Group_ 1	4.6522302291654501E-2	1.96481182108139E-2	S
A_CCATGCCTGTTTAGTA-1	0	KM4242_01	3	Primary	3 --> 3	Proneural_OPC_like_tumor	G3	Pri_Recurrence_after_TMZ	1p_19q_codeleted	CNA_Group_ 2	-8.4526233809285899E-4	2.8527363397514E-3	G2M
A_CCATGCTCTGCAGGAA-1	4	KM4242_01	3	Primary	3 --> 3	Pericyte_Endothelial	Pericyte_Endothelial	Pri_Recurrence_after_TMZ	1p_19q_codeleted	CNA_Group_ 1	5.7160437079349702E-2	-4.1089180897956297E-3	S
A_CCATGGCCCTTGTACC-1	0	KM4242_01	3	Primary	3 --> 3	Proneural_OPC_like_tumor	G3	Pri_Recurrence_after_TMZ	1p_19q_codeleted	CNA_Group_ 3	1.5799488925568199E-2	-1.30216120959842E-2	S
A_CCATTAGCGATAATCC-1	0	KM4242_01	3	Primary	3 --> 3	Proneural_OPC_like_tumor	G3	Pri_Recurrence_after_TMZ	1p_19q_codeleted	CNA_Group_ 1	4.923149906655E-2	0.104659834820055	G2M
A_CCATTCCCTGCCCACA-1	4	KM4242_01	3	Primary	3 --> 3	Pericyte_Endothelial	Pericyte_Endothelial	Pri_Recurrence_after_TMZ	1p_19q_codeleted	CNA_Group_ 1	8.4402227727361903E-2	5.2748017316817898E-3	S
A_CCATTTCTACCTATTA-1	0	KM4242_01	3	Primary	3 --> 3	Proneural_OPC_like_tumor	G3	Pri_Recurrence_after_TMZ	1p_19q_codeleted	CNA_Group_ 3	-1.6446450727486999E-2	2.8922226431616599E-2	G2M
A_CCCAAACATGCTGCTC-1	1	KM4242_01	3	Primary	3 --> 3	Oligodendrocyte_like_tumor	NA	Pri_Recurrence_after_TMZ	1p_19q_codeleted	CNA_Group_ 2	-2.4257008417500201E-2	-7.6718126697581102E-3	G1
A_CCCAACATACGTCGCG-1	2	KM4242_01	3	Primary	3 --> 3	NPC_like_tumor	G3	Pri_Recurrence_after_TMZ	non_tumor	NA	-3.0723795667519899E-2	-1.34202030903703E-2	G1
A_CCCAATTTCACAACTT-1	5	KM4242_01	3	Primary	3 --> 3	NPC_like_and_DNA_damage	G3	Pri_Recurrence_after_TMZ	1p_19q_codeleted	CNA_Group_ 1	1.96149194053368E-2	4.4566114852691002E-3	S
A_CCCAGTTAAGGCGCCG-1	0	KM4242_01	3	Primary	3 --> 3	Proneural_OPC_like_tumor	NA	Pri_Recurrence_after_TMZ	1p_19q_codeleted	CNA_Group_ 3	1.2647465806097999E-2	-3.3299596096110599E-2	S
A_CCCGACCATAGTCCGC-1	1	KM4242_01	3	Primary	3 --> 3	Oligodendrocyte_like_tumor	NA	Pri_Recurrence_after_TMZ	1p_19q_codeleted	CNA_Group_ 3	3.8166978303076297E-2	5.1231228817944702E-2	G2M
A_CCCGCAGCGCGAACTA-1	0	KM4242_01	3	Primary	3 --> 3	Proneural_OPC_like_tumor	G3	Pri_Recurrence_after_TMZ	1p_19q_codeleted	CNA_Group_ 1	4.8140705954305703E-2	3.58970135737222E-2	S
A_CCCGCCATGCTCCCGT-1	0	KM4242_01	3	Primary	3 --> 3	Proneural_OPC_like_tumor	G3	Pri_Recurrence_after_TMZ	1p_19q_codeleted	CNA_Group_ 1	1.9668991218869301E-2	-6.9024141861859201E-4	S
A_CCCGGTGGAAGAACCT-1	0	KM4242_01	3	Primary	3 --> 3	Proneural_OPC_like_tumor	G3	Pri_Recurrence_after_TMZ	1p_19q_codeleted	CNA_Group_ 3	3.5665662457526802E-2	2.1967955530369999E-2	S
A_CCCGTAAGTCTAGGCC-1	0	KM4242_01	3	Primary	3 --> 3	Proneural_OPC_like_tumor	G3	Pri_Recurrence_after_TMZ	1p_19q_codeleted	CNA_Group_ 1	6.0321107696760197E-2	-2.12560958522388E-2	S
A_CCCGTCAGCGTCTGAC-1	1	KM4242_01	3	Primary	3 --> 3	Oligodendrocyte_like_tumor	NA	Pri_Recurrence_after_TMZ	1p_19q_codeleted	CNA_Group_ 2	2.948979416756E-2	3.8277718258583599E-4	S
A_CCCTACTTGAACAATG-1	0	KM4242_01	3	Primary	3 --> 3	Proneural_OPC_like_tumor	G3	Pri_Recurrence_after_TMZ	1p_19q_codeleted	CNA_Group_ 1	4.0496019362247698E-2	-6.4629012713671705E-2	S
A_CCCTCATTCTGGAATT-1	1	KM4242_01	3	Primary	3 --> 3	Oligodendrocyte_like_tumor	NA	Pri_Recurrence_after_TMZ	1p_19q_codeleted	CNA_Group_ 3	-6.6949509432679003E-3	-5.6970587102545102E-3	G1
A_CCCTGAAATGAGTTGA-1	0	KM4242_01	3	Primary	3 --> 3	Proneural_OPC_like_tumor	G3	Pri_Recurrence_after_TMZ	1p_19q_codeleted	CNA_Group_ 1	5.7980617880793499E-2	1.01863694101874E-2	S
A_CCCTGACTAACAAATT-1	0	KM4242_01	3	Primary	3 --> 3	Proneural_OPC_like_tumor	G3	Pri_Recurrence_after_TMZ	1p_19q_codeleted	CNA_Group_ 1	0.13603568575857899	-9.0333412658330905E-2	S
A_CCCTGCGCTACGCATA-1	0	KM4242_01	3	Primary	3 --> 3	Proneural_OPC_like_tumor	G3	Pri_Recurrence_after_TMZ	1p_19q_codeleted	CNA_Group_ 1	2.8091821892132801E-2	-2.8665776929054398E-4	S
A_CCCTTTGACAGGTCTT-1	0	KM4242_01	3	Primary	3 --> 3	Proneural_OPC_like_tumor	G3	Pri_Recurrence_after_TMZ	1p_19q_codeleted	CNA_Group_ 1	5.1665087465533603E-2	1.16357419760882E-2	S
A_CCGAACCTTCCCGGCC-1	0	KM4242_01	3	Primary	3 --> 3	Proneural_OPC_like_tumor	G3	Pri_Recurrence_after_TMZ	1p_19q_codeleted	CNA_Group_ 1	1.8440538819967101E-2	4.2705469455623701E-2	G2M
A_CCGAAGTATATTGTTC-1	0	KM4242_01	3	Primary	3 --> 3	Proneural_OPC_like_tumor	G3	Pri_Recurrence_after_TMZ	1p_19q_codeleted	CNA_Group_ 3	9.4024892790000193E-3	-3.8784294450678602E-2	S
A_CCGACAAAGGGAGTGC-1	0	KM4242_01	3	Primary	3 --> 3	Proneural_OPC_like_tumor	G3	Pri_Recurrence_after_TMZ	1p_19q_codeleted	CNA_Group_ 1	4.3246725918904098E-2	-4.78584691961597E-2	S
A_CCGATTCGAGGGACCC-1	5	KM4242_01	3	Primary	3 --> 3	NPC_like_and_DNA_damage	G3	Pri_Recurrence_after_TMZ	1p_19q_codeleted	CNA_Group_ 1	5.8116186821434601E-2	-3.3186755644514503E-2	S
A_CCGCACAAAGACCAAC-1	1	KM4242_01	3	Primary	3 --> 3	Oligodendrocyte_like_tumor	NA	Pri_Recurrence_after_TMZ	1p_19q_codeleted	CNA_Group_ 3	2.31298630719191E-2	3.1363476538276903E-2	G2M
A_CCGCACGTGACCTCGG-1	0	KM4242_01	3	Primary	3 --> 3	Proneural_OPC_like_tumor	G3	Pri_Recurrence_after_TMZ	1p_19q_codeleted	CNA_Group_ 3	7.7517564883646306E-2	-4.4276945326419501E-2	S
A_CCGCATGTGGTACGAT-1	0	KM4242_01	3	Primary	3 --> 3	Proneural_OPC_like_tumor	G3	Pri_Recurrence_after_TMZ	1p_19q_codeleted	CNA_Group_ 2	5.1789495319592101E-2	1.04612355771772E-3	S
A_CCGCGGAATGCGTCAC-1	0	KM4242_01	3	Primary	3 --> 3	Proneural_OPC_like_tumor	G3	Pri_Recurrence_after_TMZ	1p_19q_codeleted	CNA_Group_ 1	9.1526473234930794E-2	-1.6579211519881901E-2	S
A_CCGCGGGTACGAAGAA-1	0	KM4242_01	3	Primary	3 --> 3	Proneural_OPC_like_tumor	G3	Pri_Recurrence_after_TMZ	1p_19q_codeleted	CNA_Group_ 3	-6.60484364955813E-2	-5.2576810294531998E-2	G1
A_CCGCGTAGGTAAGGGC-1	0	KM4242_01	3	Primary	3 --> 3	Proneural_OPC_like_tumor	G3	Pri_Recurrence_after_TMZ	1p_19q_codeleted	CNA_Group_ 3	5.2383761977881204E-3	3.12332388726369E-2	G2M
A_CCGCTATCAGCACCAG-1	0	KM4242_01	3	Primary	3 --> 3	Proneural_OPC_like_tumor	G3	Pri_Recurrence_after_TMZ	1p_19q_codeleted	CNA_Group_ 1	-8.7656488099115606E-3	2.85801033605106E-2	G2M
A_CCGCTTACCTCACTCT-1	0	KM4242_01	3	Primary	3 --> 3	Proneural_OPC_like_tumor	G3	Pri_Recurrence_after_TMZ	1p_19q_codeleted	CNA_Group_ 1	-7.2836645829957497E-2	-9.2593411104312601E-2	G1
A_CCGGAATGGTTTCAGT-1	0	KM4242_01	3	Primary	3 --> 3	Proneural_OPC_like_tumor	G3	Pri_Recurrence_after_TMZ	1p_19q_codeleted	CNA_Group_ 1	-6.2282342746264298E-2	-2.54272493454448E-2	G1
A_CCGGAGCGTACTTTCT-1	0	KM4242_01	3	Primary	3 --> 3	Proneural_OPC_like_tumor	G3	Pri_Recurrence_after_TMZ	NA	NA	1.33012020063686E-2	-2.33296670827913E-2	S
A_CCGGCGCATATTGGAT-1	1	KM4242_01	3	Primary	3 --> 3	Oligodendrocyte_like_tumor	NA	Pri_Recurrence_after_TMZ	1p_19q_codeleted	CNA_Group_ 3	-2.0935511770506898E-2	-3.2670156125088799E-2	G1
A_CCGGGACCCGCAGAGA-1	2	KM4242_01	3	Primary	3 --> 3	NPC_like_tumor	Neurons	Pri_Recurrence_after_TMZ	non_tumor	NA	-2.50643220159198E-2	3.6810568791585903E-2	G2M
A_CCGGGCGGTCTCGTCA-1	1	KM4242_01	3	Primary	3 --> 3	Oligodendrocyte_like_tumor	NA	Pri_Recurrence_after_TMZ	1p_19q_codeleted	CNA_Group_ 3	1.3816310554028099E-2	9.9700213890282392E-3	S
A_CCGGGCTGCTCCATAC-1	1	KM4242_01	3	Primary	3 --> 3	Oligodendrocyte_like_tumor	NA	Pri_Recurrence_after_TMZ	1p_19q_codeleted	CNA_Group_ 2	-1.66802287264184E-3	-2.7798948709647501E-2	G1
A_CCGGGTTCGAGGTTAC-1	2	KM4242_01	3	Primary	3 --> 3	NPC_like_tumor	G3	Pri_Recurrence_after_TMZ	non_tumor	NA	-3.6580683538216197E-2	3.1469563675240599E-2	G2M
A_CCGTAAGTTGGTCCCA-1	1	KM4242_01	3	Primary	3 --> 3	Oligodendrocyte_like_tumor	NA	Pri_Recurrence_after_TMZ	1p_19q_codeleted	CNA_Group_ 3	-1.94204683850528E-3	-6.9990592786025804E-2	G1
A_CCGTAGGAAATCCCTG-1	0	KM4242_01	3	Primary	3 --> 3	Proneural_OPC_like_tumor	NA	Pri_Recurrence_after_TMZ	1p_19q_codeleted	CNA_Group_ 1	-1.80031323732122E-3	5.0497508640091997E-2	G2M
A_CCGTGTTAAATTCCAT-1	5	KM4242_01	3	Primary	3 --> 3	NPC_like_and_DNA_damage	G3	Pri_Recurrence_after_TMZ	1p_19q_codeleted	CNA_Group_ 1	-7.4680509211555697E-3	-3.2474707795266199E-2	G1
A_CCGTTACGTTAGAACA-1	1	KM4242_01	3	Primary	3 --> 3	Oligodendrocyte_like_tumor	NA	Pri_Recurrence_after_TMZ	1p_19q_codeleted	CNA_Group_ 3	1.9246938205508501E-2	4.1444071926639001E-2	G2M
A_CCGTTCCGAATCTCGG-1	0	KM4242_01	3	Primary	3 --> 3	Proneural_OPC_like_tumor	G3	Pri_Recurrence_after_TMZ	1p_19q_codeleted	CNA_Group_ 1	9.7657731415054697E-2	-8.4567017858899099E-2	S
A_CCTAAATTAACGGTTC-1	0	KM4242_01	3	Primary	3 --> 3	Proneural_OPC_like_tumor	G3	Pri_Recurrence_after_TMZ	1p_19q_codeleted	CNA_Group_ 1	3.5671221938841598E-2	6.6525248028316804E-3	S
A_CCTACTGCTTACACTT-1	0	KM4242_01	3	Primary	3 --> 3	Proneural_OPC_like_tumor	G3	Pri_Recurrence_after_TMZ	1p_19q_codeleted	CNA_Group_ 1	-2.45513142219306E-2	-9.2929398415700099E-3	G1
A_CCTAGGCGTAGCGATC-1	7	KM4242_01	3	Primary	3 --> 3	Cortical_neurons_and_tumor_cells	Cortical_neurons_and_tumor_cells	Pri_Recurrence_after_TMZ	non_tumor	CNA_Group_ 3	-1.9989189721443699E-3	2.5073787014154799E-2	G2M
A_CCTATAATGAGTGCCC-1	5	KM4242_01	3	Primary	3 --> 3	NPC_like_and_DNA_damage	G3	Pri_Recurrence_after_TMZ	1p_19q_codeleted	CNA_Group_ 1	2.8032783277284801E-2	-4.90791976365471E-3	S
A_CCTATCTATATCGGAA-1	4	KM4242_01	3	Primary	3 --> 3	Pericyte_Endothelial	Pericyte_Endothelial	Pri_Recurrence_after_TMZ	non_tumor	CNA_Group_ 2	8.5551361120534504E-4	2.7880777726760501E-2	G2M
A_CCTATGGGTTACCGTC-1	1	KM4242_01	3	Primary	3 --> 3	Oligodendrocyte_like_tumor	NA	Pri_Recurrence_after_TMZ	1p_19q_codeleted	CNA_Group_ 3	4.3748129453309597E-4	-2.7362958790811399E-2	S
A_CCTATGGTCAAAGCTG-1	0	KM4242_01	3	Primary	3 --> 3	Proneural_OPC_like_tumor	G3	Pri_Recurrence_after_TMZ	1p_19q_codeleted	CNA_Group_ 1	7.4205356855739896E-2	-2.0206709086923302E-2	S
A_CCTCACCAATCTTGAC-1	0	KM4242_01	3	Primary	3 --> 3	Proneural_OPC_like_tumor	G3	Pri_Recurrence_after_TMZ	1p_19q_codeleted	CNA_Group_ 3	-8.9327454751222408E-3	-5.0922527280512102E-2	G1
A_CCTCCGACAATTCAAG-1	2	KM4242_01	3	Primary	3 --> 3	NPC_like_tumor	G3	Pri_Recurrence_after_TMZ	non_tumor	NA	9.9537884708316704E-2	-1.9846858285779102E-3	S
A_CCTCCTGTTGTGTCGT-1	0	KM4242_01	3	Primary	3 --> 3	Proneural_OPC_like_tumor	NA	Pri_Recurrence_after_TMZ	1p_19q_codeleted	CNA_Group_ 1	4.8505528179006697E-2	3.5258328055940799E-2	S
A_CCTCGCCAGCAAATTA-1	4	KM4242_01	3	Primary	3 --> 3	Pericyte_Endothelial	Pericyte_Endothelial	Pri_Recurrence_after_TMZ	1p_19q_codeleted	CNA_Group_ 2	-2.62487506414779E-2	-5.2467852806502603E-2	G1
A_CCTCGCGCTGTGCGAT-1	0	KM4242_01	3	Primary	3 --> 3	Proneural_OPC_like_tumor	G3	Pri_Recurrence_after_TMZ	1p_19q_codeleted	CNA_Group_ 2	1.4817265231122699E-3	7.7093609602016305E-2	G2M
A_CCTCGGACCGGGATAG-1	1	KM4242_01	3	Primary	3 --> 3	Oligodendrocyte_like_tumor	NA	Pri_Recurrence_after_TMZ	1p_19q_codeleted	CNA_Group_ 1	-1.4554622886341399E-2	2.4544752521538499E-2	G2M
A_CCTCGGATGCTACCTG-1	0	KM4242_01	3	Primary	3 --> 3	Proneural_OPC_like_tumor	G3	Pri_Recurrence_after_TMZ	1p_19q_codeleted	CNA_Group_ 1	-4.6652423171110197E-3	-6.1043457523217298E-2	G1
A_CCTCTAATCTGCCAAG-1	1	KM4242_01	3	Primary	3 --> 3	Oligodendrocyte_like_tumor	NA	Pri_Recurrence_after_TMZ	1p_19q_codeleted	CNA_Group_ 3	2.59832958791015E-2	3.3967023567024197E-2	G2M
A_CCTCTCTCCCATCTAG-1	2	KM4242_01	3	Primary	3 --> 3	NPC_like_tumor	G3	Pri_Recurrence_after_TMZ	non_tumor	NA	5.0835354006452402E-3	-6.5815969654372905E-2	S
A_CCTCTGGCCTAGACGG-1	4	KM4242_01	3	Primary	3 --> 3	Pericyte_Endothelial	Pericyte_Endothelial	Pri_Recurrence_after_TMZ	1p_19q_codeleted	CNA_Group_ 2	5.8138640612916499E-3	2.5820539194895901E-2	G2M
A_CCTCTGTACTATTCTA-1	0	KM4242_01	3	Primary	3 --> 3	Proneural_OPC_like_tumor	G3	Pri_Recurrence_after_TMZ	1p_19q_codeleted	CNA_Group_ 2	-4.2477014716593403E-2	-4.8607065388400497E-2	G1
A_CCTGAACGATATATTC-1	1	KM4242_01	3	Primary	3 --> 3	Oligodendrocyte_like_tumor	NA	Pri_Recurrence_after_TMZ	1p_19q_codeleted	CNA_Group_ 1	3.4597401122789001E-2	4.1108863474185901E-2	G2M
A_CCTGAATATTTACATA-1	1	KM4242_01	3	Primary	3 --> 3	Oligodendrocyte_like_tumor	NA	Pri_Recurrence_after_TMZ	1p_19q_codeleted	CNA_Group_ 2	9.9164133914259895E-3	4.3320181339849398E-2	G2M
A_CCTGACCACCGATGGT-1	0	KM4242_01	3	Primary	3 --> 3	Proneural_OPC_like_tumor	G3	Pri_Recurrence_after_TMZ	1p_19q_codeleted	CNA_Group_ 1	3.89053719875617E-2	-4.3889333094867797E-2	S
A_CCTGCCCGTTGTCTAG-1	0	KM4242_01	3	Primary	3 --> 3	Proneural_OPC_like_tumor	G3	Pri_Recurrence_after_TMZ	1p_19q_codeleted	CNA_Group_ 1	4.7953673794092197E-2	-3.6636376691198902E-2	S
A_CCTGCGTTCTACGCTT-1	4	KM4242_01	3	Primary	3 --> 3	Pericyte_Endothelial	Pericyte_Endothelial	Pri_Recurrence_after_TMZ	non_tumor	CNA_Group_ 3	1.1611395834430801E-2	-6.2619909234235696E-3	S
A_CCTGCTATTTGAGAAG-1	0	KM4242_01	3	Primary	3 --> 3	Proneural_OPC_like_tumor	NA	Pri_Recurrence_after_TMZ	1p_19q_codeleted	CNA_Group_ 1	1.9847944514325699E-2	-3.7311043287858899E-2	S
A_CCTGGCTAGACCCGCC-1	0	KM4242_01	3	Primary	3 --> 3	Proneural_OPC_like_tumor	G3	Pri_Recurrence_after_TMZ	1p_19q_codeleted	CNA_Group_ 1	3.6554636061759703E-2	-4.2042170940073099E-2	S
A_CCTGGTCGAATGTGGG-1	0	KM4242_01	3	Primary	3 --> 3	Proneural_OPC_like_tumor	G3	Pri_Recurrence_after_TMZ	1p_19q_codeleted	CNA_Group_ 2	-8.3089020023772199E-3	-3.6503925833617001E-2	G1
A_CCTGTAAGACATGATA-1	2	KM4242_01	3	Primary	3 --> 3	NPC_like_tumor	G3	Pri_Recurrence_after_TMZ	1p_19q_codeleted	NA	3.3520437679822102E-2	2.16833603995823E-2	S
A_CCTGTACTCACGCCCA-1	5	KM4242_01	3	Primary	3 --> 3	NPC_like_and_DNA_damage	G3	Pri_Recurrence_after_TMZ	1p_19q_codeleted	CNA_Group_ 1	-5.8375790556992997E-2	-8.0859721378342506E-2	G1
A_CCTGTCACCCGGGCTC-1	7	KM4242_01	3	Primary	3 --> 3	Cortical_neurons_and_tumor_cells	Cortical_neurons_and_tumor_cells	Pri_Recurrence_after_TMZ	non_tumor	CNA_Group_ 3	-6.0861521398393799E-2	-4.9252970626191502E-2	G1
A_CCTGTCGCCCGTAAAT-1	0	KM4242_01	3	Primary	3 --> 3	Proneural_OPC_like_tumor	G3	Pri_Recurrence_after_TMZ	1p_19q_codeleted	CNA_Group_ 1	6.8481657013202801E-2	5.4105756831035801E-2	S
A_CCTTCTTGATCCAGTG-1	1	KM4242_01	3	Primary	3 --> 3	Oligodendrocyte_like_tumor	NA	Pri_Recurrence_after_TMZ	1p_19q_codeleted	CNA_Group_ 2	2.31410181776525E-2	-1.1218653323049299E-2	S
A_CCTTTAAGGGAGCACT-1	6	KM4242_01	3	Primary	3 --> 3	IEG	G3	Pri_Recurrence_after_TMZ	1p_19q_codeleted	CNA_Group_ 1	6.3637971386773295E-2	2.1709758324230301E-2	S
A_CCTTTCAATGAAGAAA-1	1	KM4242_01	3	Primary	3 --> 3	Oligodendrocyte_like_tumor	NA	Pri_Recurrence_after_TMZ	1p_19q_codeleted	CNA_Group_ 2	-2.5412872705072101E-2	5.0755469019522097E-2	G2M
A_CGAAACGCAATTCATG-1	0	KM4242_01	3	Primary	3 --> 3	Proneural_OPC_like_tumor	G3	Pri_Recurrence_after_TMZ	1p_19q_codeleted	CNA_Group_ 1	5.27929183774603E-2	9.3133779425163002E-2	G2M
A_CGAACCCGCATGCGTC-1	0	KM4242_01	3	Primary	3 --> 3	Proneural_OPC_like_tumor	G3	Pri_Recurrence_after_TMZ	1p_19q_codeleted	CNA_Group_ 1	8.1130533097907298E-3	9.4196705708600295E-2	G2M
A_CGAAGTTGCTCTGTGT-1	0	KM4242_01	3	Primary	3 --> 3	Proneural_OPC_like_tumor	G3	Pri_Recurrence_after_TMZ	1p_19q_codeleted	CNA_Group_ 1	-2.71116202411807E-2	1.77586573463875E-3	G2M
A_CGAATGACGCATAATG-1	0	KM4242_01	3	Primary	3 --> 3	Proneural_OPC_like_tumor	G3	Pri_Recurrence_after_TMZ	1p_19q_codeleted	CNA_Group_ 1	7.5285342144563297E-2	-1.29234372029743E-2	S
A_CGACAGTTCGCGTTAT-1	0	KM4242_01	3	Primary	3 --> 3	Proneural_OPC_like_tumor	G3	Pri_Recurrence_after_TMZ	1p_19q_codeleted	CNA_Group_ 1	4.6593733903841202E-2	-6.8272855005351504E-2	S
A_CGACTCAGGATGTTAT-1	7	KM4242_01	3	Primary	3 --> 3	Cortical_neurons_and_tumor_cells	Cortical_neurons_and_tumor_cells	Pri_Recurrence_after_TMZ	1p_19q_codeleted	CNA_Group_ 2	4.6343583597273801E-2	1.2193434079498E-2	S
A_CGAGACCCTAGAGTGT-1	0	KM4242_01	3	Primary	3 --> 3	Proneural_OPC_like_tumor	G3	Pri_Recurrence_after_TMZ	1p_19q_codeleted	CNA_Group_ 1	3.4474399189424298E-2	-6.8695397527392E-3	S
A_CGAGAGATGTGAACCT-1	1	KM4242_01	3	Primary	3 --> 3	Oligodendrocyte_like_tumor	NA	Pri_Recurrence_after_TMZ	1p_19q_codeleted	CNA_Group_ 3	7.3517735648309698E-2	3.84496562582263E-2	S
A_CGAGAGCTTTCACTAC-1	0	KM4242_01	3	Primary	3 --> 3	Proneural_OPC_like_tumor	G3	Pri_Recurrence_after_TMZ	1p_19q_codeleted	CNA_Group_ 1	0.22129818045964	7.8234889839390503E-2	S
A_CGAGCACTTCAAGTTT-1	0	KM4242_01	3	Primary	3 --> 3	Proneural_OPC_like_tumor	G3	Pri_Recurrence_after_TMZ	1p_19q_codeleted	CNA_Group_ 1	1.7610699599769301E-2	-6.3134400546306604E-2	S
A_CGAGCTGGGCTTTAGG-1	1	KM4242_01	3	Primary	3 --> 3	Oligodendrocyte_like_tumor	NA	Pri_Recurrence_after_TMZ	1p_19q_codeleted	CNA_Group_ 3	-6.4548785073835296E-2	-1.8975159377112201E-2	G1
A_CGAGGCTAAATATGGC-1	1	KM4242_01	3	Primary	3 --> 3	Oligodendrocyte_like_tumor	NA	Pri_Recurrence_after_TMZ	1p_19q_codeleted	CNA_Group_ 3	1.46941590399031E-2	2.8690877652543301E-2	G2M
A_CGAGGGACTGCGGTCG-1	1	KM4242_01	3	Primary	3 --> 3	Oligodendrocyte_like_tumor	NA	Pri_Recurrence_after_TMZ	1p_19q_codeleted	CNA_Group_ 3	-3.1012020456910198E-2	-8.16430444298419E-3	G1
A_CGAGGGTATCCAGGTG-1	0	KM4242_01	3	Primary	3 --> 3	Proneural_OPC_like_tumor	G3	Pri_Recurrence_after_TMZ	1p_19q_codeleted	CNA_Group_ 1	4.8890650696046298E-2	-4.3721781212534401E-2	S
A_CGAGTACTAAAGAGGA-1	4	KM4242_01	3	Primary	3 --> 3	Pericyte_Endothelial	Pericyte_Endothelial	Pri_Recurrence_after_TMZ	1p_19q_codeleted	CNA_Group_ 1	0.12472003146176899	-1.5894221337040701E-2	S
A_CGAGTTCTGTCCCACC-1	1	KM4242_01	3	Primary	3 --> 3	Oligodendrocyte_like_tumor	NA	Pri_Recurrence_after_TMZ	1p_19q_codeleted	CNA_Group_ 3	-2.2321234320181401E-2	-1.8376309711026599E-2	G1
A_CGAGTTTATCGGACTG-1	1	KM4242_01	3	Primary	3 --> 3	Oligodendrocyte_like_tumor	NA	Pri_Recurrence_after_TMZ	1p_19q_codeleted	CNA_Group_ 3	4.6849673478760102E-2	-3.5441506636070298E-3	S
A_CGATACCTCGCGGACA-1	0	KM4242_01	3	Primary	3 --> 3	Proneural_OPC_like_tumor	G3	Pri_Recurrence_after_TMZ	1p_19q_codeleted	CNA_Group_ 2	-4.1093758642690201E-2	2.7859442918807001E-2	G2M
A_CGATAGTCGTACTGCA-1	0	KM4242_01	3	Primary	3 --> 3	Proneural_OPC_like_tumor	G3	Pri_Recurrence_after_TMZ	1p_19q_codeleted	CNA_Group_ 1	3.1177364214647302E-3	-6.4236902004762897E-2	S
A_CGATCCGACCCAGTGC-1	2	KM4242_01	3	Primary	3 --> 3	NPC_like_tumor	G3	Pri_Recurrence_after_TMZ	1p_19q_codeleted	NA	2.6895357985508399E-2	-2.2586506460438301E-2	S
A_CGATTAAATATCTCCT-1	0	KM4242_01	3	Primary	3 --> 3	Proneural_OPC_like_tumor	G3	Pri_Recurrence_after_TMZ	1p_19q_codeleted	CNA_Group_ 2	3.0581258099942301E-2	-4.0136670499874301E-2	S
A_CGATTCGCCTGGCTGC-1	0	KM4242_01	3	Primary	3 --> 3	Proneural_OPC_like_tumor	G3	Pri_Recurrence_after_TMZ	1p_19q_codeleted	CNA_Group_ 1	-1.4883919610079699E-2	1.04209501624933E-2	G2M
A_CGCAAACACGAGTTAC-1	5	KM4242_01	3	Primary	3 --> 3	NPC_like_and_DNA_damage	G3	Pri_Recurrence_after_TMZ	non_tumor	CNA_Group_ 1	5.6670601245265101E-2	9.0294856338697202E-2	G2M
A_CGCAATTACTTTCGGT-1	5	KM4242_01	3	Primary	3 --> 3	NPC_like_and_DNA_damage	G3	Pri_Recurrence_after_TMZ	1p_19q_codeleted	CNA_Group_ 3	1.43881292813872E-2	-1.7716898786037098E-2	S
A_CGCAATTAGGGTAATA-1	4	KM4242_01	3	Primary	3 --> 3	Pericyte_Endothelial	Pericyte_Endothelial	Pri_Recurrence_after_TMZ	1p_19q_codeleted	CNA_Group_ 3	-2.6714492370166501E-2	-1.9739491226778299E-2	G1
A_CGCAATTCTACAATAA-1	0	KM4242_01	3	Primary	3 --> 3	Proneural_OPC_like_tumor	G3	Pri_Recurrence_after_TMZ	1p_19q_codeleted	CNA_Group_ 3	3.8278059486709201E-3	-2.4830991899381601E-2	S
A_CGCACATGTCCACTAC-1	1	KM4242_01	3	Primary	3 --> 3	Oligodendrocyte_like_tumor	NA	Pri_Recurrence_after_TMZ	1p_19q_codeleted	CNA_Group_ 3	-4.2176479448846699E-2	7.8673566469892008E-3	G2M
A_CGCATGCCGAATGCGT-1	5	KM4242_01	3	Primary	3 --> 3	NPC_like_and_DNA_damage	G3	Pri_Recurrence_after_TMZ	1p_19q_codeleted	CNA_Group_ 1	4.2132610467279397E-2	-1.24440227204036E-2	S
A_CGCATGGTGCGATGCT-1	0	KM4242_01	3	Primary	3 --> 3	Proneural_OPC_like_tumor	G3	Pri_Recurrence_after_TMZ	1p_19q_codeleted	CNA_Group_ 3	0.13652972879851899	-1.06430212977263E-3	S
A_CGCATTAGCTAATAGG-1	4	KM4242_01	3	Primary	3 --> 3	Pericyte_Endothelial	Pericyte_Endothelial	Pri_Recurrence_after_TMZ	1p_19q_codeleted	CNA_Group_ 3	-9.2093905341745896E-3	2.6903065054505099E-2	G2M
A_CGCCAAGAAGCCGAGT-1	0	KM4242_01	3	Primary	3 --> 3	Proneural_OPC_like_tumor	G3	Pri_Recurrence_after_TMZ	1p_19q_codeleted	CNA_Group_ 1	2.2041983537115301E-2	1.75733734948312E-2	S
A_CGCCATCCGATTATGA-1	7	KM4242_01	3	Primary	3 --> 3	Cortical_neurons_and_tumor_cells	Cortical_neurons_and_tumor_cells	Pri_Recurrence_after_TMZ	1p_19q_codeleted	CNA_Group_ 3	-3.2401518305586401E-2	2.2305688240475099E-2	G2M
A_CGCCCAGCACGCCTAG-1	0	KM4242_01	3	Primary	3 --> 3	Proneural_OPC_like_tumor	G3	Pri_Recurrence_after_TMZ	1p_19q_codeleted	CNA_Group_ 1	-9.9057261612904794E-3	2.9381056713584201E-2	G2M
A_CGCCCAGCGTTTCACG-1	0	KM4242_01	3	Primary	3 --> 3	Proneural_OPC_like_tumor	G3	Pri_Recurrence_after_TMZ	1p_19q_codeleted	CNA_Group_ 1	7.9809477564621797E-2	5.7758804753795898E-2	S
A_CGCCCGCTTCCGTACA-1	4	KM4242_01	3	Primary	3 --> 3	Pericyte_Endothelial	Pericyte_Endothelial	Pri_Recurrence_after_TMZ	1p_19q_codeleted	CNA_Group_ 3	3.8210511119581E-2	1.72065554412228E-2	S
A_CGCCCTTGAAGGCTGA-1	4	KM4242_01	3	Primary	3 --> 3	Pericyte_Endothelial	Pericyte_Endothelial	Pri_Recurrence_after_TMZ	1p_19q_codeleted	CNA_Group_ 1	2.5407347247889601E-2	-5.4835945995273402E-2	S
A_CGCCGCCCATGCCTGT-1	1	KM4242_01	3	Primary	3 --> 3	Oligodendrocyte_like_tumor	NA	Pri_Recurrence_after_TMZ	1p_19q_codeleted	CNA_Group_ 2	2.3163999390448699E-2	1.0282115958573999E-2	S
A_CGCCTCCCTCCTCTAT-1	0	KM4242_01	3	Primary	3 --> 3	Proneural_OPC_like_tumor	NA	Pri_Recurrence_after_TMZ	1p_19q_codeleted	CNA_Group_ 1	1.15629021571702E-2	-2.8225554480797999E-2	S
A_CGCCTGGCCTACGTAA-1	5	KM4242_01	3	Primary	3 --> 3	NPC_like_and_DNA_damage	G3	Pri_Recurrence_after_TMZ	1p_19q_codeleted	CNA_Group_ 1	3.32415242146454E-2	-5.3948851330817997E-2	S
A_CGCGAAGTGGCATACT-1	0	KM4242_01	3	Primary	3 --> 3	Proneural_OPC_like_tumor	NA	Pri_Recurrence_after_TMZ	1p_19q_codeleted	CNA_Group_ 1	-2.99382644436322E-3	-5.1823120163818799E-3	G1
A_CGCGACCGCGACAGAT-1	0	KM4242_01	3	Primary	3 --> 3	Proneural_OPC_like_tumor	G3	Pri_Recurrence_after_TMZ	1p_19q_codeleted	CNA_Group_ 2	-2.1868509148084001E-2	-8.3668375494658897E-3	G1
A_CGCGCATGTTTGATTG-1	0	KM4242_01	3	Primary	3 --> 3	Proneural_OPC_like_tumor	G3	Pri_Recurrence_after_TMZ	1p_19q_codeleted	CNA_Group_ 1	2.2673715100112301E-2	-9.9858342905234793E-3	S
A_CGCGCCCGACTTAATA-1	1	KM4242_01	3	Primary	3 --> 3	Oligodendrocyte_like_tumor	NA	Pri_Recurrence_after_TMZ	1p_19q_codeleted	CNA_Group_ 3	2.0402114043894099E-2	3.1601951489020799E-2	G2M
A_CGCGGGAATTAGGCAG-1	1	KM4242_01	3	Primary	3 --> 3	Oligodendrocyte_like_tumor	NA	Pri_Recurrence_after_TMZ	1p_19q_codeleted	CNA_Group_ 3	7.3573207990677E-2	2.8573302602000899E-2	S
A_CGCGGGAATTCCTTTC-1	0	KM4242_01	3	Primary	3 --> 3	Proneural_OPC_like_tumor	G3	Pri_Recurrence_after_TMZ	1p_19q_codeleted	CNA_Group_ 1	5.4007808968423603E-2	-1.35628632516758E-2	S
A_CGCGTTCATGAAATAC-1	0	KM4242_01	3	Primary	3 --> 3	Proneural_OPC_like_tumor	G3	Pri_Recurrence_after_TMZ	1p_19q_codeleted	CNA_Group_ 3	5.0727032708127499E-2	8.3003958867857008E-3	S
A_CGCTACGGGACATTTA-1	4	KM4242_01	3	Primary	3 --> 3	Pericyte_Endothelial	Pericyte_Endothelial	Pri_Recurrence_after_TMZ	1p_19q_codeleted	CNA_Group_ 1	-2.0739952879997799E-2	-4.7100787621871601E-2	G1
A_CGCTATTCAATGTATG-1	0	KM4242_01	3	Primary	3 --> 3	Proneural_OPC_like_tumor	G3	Pri_Recurrence_after_TMZ	1p_19q_codeleted	CNA_Group_ 3	5.0275768079905803E-2	-6.8127608990161501E-2	S
A_CGCTATTCTTAGGCTC-1	0	KM4242_01	3	Primary	3 --> 3	Proneural_OPC_like_tumor	G3	Pri_Recurrence_after_TMZ	1p_19q_codeleted	CNA_Group_ 1	9.8971967567894698E-2	1.3446277826011399E-2	S
A_CGCTCGACATAATGAT-1	0	KM4242_01	3	Primary	3 --> 3	Proneural_OPC_like_tumor	NA	Pri_Recurrence_after_TMZ	1p_19q_codeleted	CNA_Group_ 1	0.105776322681257	4.30306434382721E-2	S
A_CGCTCTCCGTAGATTA-1	0	KM4242_01	3	Primary	3 --> 3	Proneural_OPC_like_tumor	G3	Pri_Recurrence_after_TMZ	1p_19q_codeleted	CNA_Group_ 1	-2.4808309618305499E-3	-4.0984350916596302E-2	G1
A_CGCTGTGACGCCGCAC-1	0	KM4242_01	3	Primary	3 --> 3	Proneural_OPC_like_tumor	G3	Pri_Recurrence_after_TMZ	1p_19q_codeleted	CNA_Group_ 1	3.8539095562485602E-2	2.2897403362096998E-2	S
A_CGCTTATTCCCGGTCG-1	5	KM4242_01	3	Primary	3 --> 3	NPC_like_and_DNA_damage	G3	Pri_Recurrence_after_TMZ	1p_19q_codeleted	CNA_Group_ 1	2.6188489732261701E-2	5.0156764935536599E-2	G2M
A_CGCTTCCACTGAAATC-1	0	KM4242_01	3	Primary	3 --> 3	Proneural_OPC_like_tumor	NA	Pri_Recurrence_after_TMZ	1p_19q_codeleted	CNA_Group_ 3	2.0970796313480401E-2	-1.7760151890276601E-2	S
A_CGCTTTCATACCGGTG-1	1	KM4242_01	3	Primary	3 --> 3	Oligodendrocyte_like_tumor	NA	Pri_Recurrence_after_TMZ	1p_19q_codeleted	CNA_Group_ 4	-3.5458702889238199E-2	-2.6860024201595299E-2	G1
A_CGCTTTCTTGCATTCG-1	1	KM4242_01	3	Primary	3 --> 3	Oligodendrocyte_like_tumor	NA	Pri_Recurrence_after_TMZ	1p_19q_codeleted	CNA_Group_ 3	6.1505674578109702E-2	-1.8892812602018399E-3	S
A_CGGAGCAATTTAATCG-1	0	KM4242_01	3	Primary	3 --> 3	Proneural_OPC_like_tumor	G3	Pri_Recurrence_after_TMZ	1p_19q_codeleted	CNA_Group_ 2	-3.94092726961255E-2	-1.6473086135901701E-2	G1
A_CGGAGCATGGCGATCC-1	0	KM4242_01	3	Primary	3 --> 3	Proneural_OPC_like_tumor	NA	Pri_Recurrence_after_TMZ	1p_19q_codeleted	CNA_Group_ 1	6.92654392457209E-2	4.0246487069334598E-2	S
A_CGGAGTTTGAGAGACA-1	0	KM4242_01	3	Primary	3 --> 3	Proneural_OPC_like_tumor	G3	Pri_Recurrence_after_TMZ	1p_19q_codeleted	CNA_Group_ 3	2.62311425751891E-2	-3.1919954587153902E-2	S
A_CGGATCCTCAAGGACT-1	6	KM4242_01	3	Primary	3 --> 3	IEG	G3	Pri_Recurrence_after_TMZ	1p_19q_codeleted	CNA_Group_ 1	8.9118649805468297E-2	3.2593395752514701E-3	S
A_CGGCAAACATCGTGCG-1	5	KM4242_01	3	Primary	3 --> 3	NPC_like_and_DNA_damage	G3	Pri_Recurrence_after_TMZ	1p_19q_codeleted	CNA_Group_ 2	-1.41516179104017E-2	2.9836573216612799E-3	G2M
A_CGGCAGGGTCGGGTTG-1	1	KM4242_01	3	Primary	3 --> 3	Oligodendrocyte_like_tumor	NA	Pri_Recurrence_after_TMZ	1p_19q_codeleted	CNA_Group_ 2	-1.1437986248173101E-2	-5.9258132213713698E-2	G1
A_CGGCCACGCACAAAGT-1	0	KM4242_01	3	Primary	3 --> 3	Proneural_OPC_like_tumor	G3	Pri_Recurrence_after_TMZ	1p_19q_codeleted	CNA_Group_ 1	7.7980547310225204E-2	3.8541588433254802E-2	S
A_CGGGAATTTATGTAAA-1	0	KM4242_01	3	Primary	3 --> 3	Proneural_OPC_like_tumor	G3	Pri_Recurrence_after_TMZ	1p_19q_codeleted	CNA_Group_ 2	-4.0563065842642004E-3	-4.2223180070504601E-2	G1
A_CGGGATCAATGTAAGA-1	1	KM4242_01	3	Primary	3 --> 3	Oligodendrocyte_like_tumor	NA	Pri_Recurrence_after_TMZ	1p_19q_codeleted	CNA_Group_ 2	2.1558558700008799E-2	-7.4016661411687806E-2	S
A_CGGGCAGCTAAACCGC-1	4	KM4242_01	3	Primary	3 --> 3	Pericyte_Endothelial	Pericyte_Endothelial	Pri_Recurrence_after_TMZ	1p_19q_codeleted	CNA_Group_ 1	0.10539626907822	3.0725903077725401E-2	S
A_CGGGCCTTCTTTGTAA-1	0	KM4242_01	3	Primary	3 --> 3	Proneural_OPC_like_tumor	G3	Pri_Recurrence_after_TMZ	1p_19q_codeleted	CNA_Group_ 2	-6.7596984801581196E-3	4.4542638751554398E-2	G2M
A_CGGGCGATGGATCACG-1	0	KM4242_01	3	Primary	3 --> 3	Proneural_OPC_like_tumor	G3	Pri_Recurrence_after_TMZ	1p_19q_codeleted	CNA_Group_ 1	9.9946736674317999E-2	-6.6977798003602901E-2	S
A_CGGGTGTACCCATTTA-1	1	KM4242_01	3	Primary	3 --> 3	Oligodendrocyte_like_tumor	NA	Pri_Recurrence_after_TMZ	1p_19q_codeleted	CNA_Group_ 2	-9.6141249077795806E-3	-3.2307666213400303E-2	G1
A_CGGTACTAGAATCAAA-1	1	KM4242_01	3	Primary	3 --> 3	Oligodendrocyte_like_tumor	NA	Pri_Recurrence_after_TMZ	1p_19q_codeleted	CNA_Group_ 2	0.108430245934408	-2.7154026961021299E-2	S
A_CGGTAGAGGTGCAGGT-1	1	KM4242_01	3	Primary	3 --> 3	Oligodendrocyte_like_tumor	NA	Pri_Recurrence_after_TMZ	1p_19q_codeleted	CNA_Group_ 3	-4.1333245349584199E-2	1.1466498650241E-2	G2M
A_CGGTCAAGTGGGAACC-1	1	KM4242_01	3	Primary	3 --> 3	Oligodendrocyte_like_tumor	NA	Pri_Recurrence_after_TMZ	1p_19q_codeleted	CNA_Group_ 3	4.3380608739750103E-2	4.2276652305132001E-2	S
A_CGGTCTATCAACCCGT-1	1	KM4242_01	3	Primary	3 --> 3	Oligodendrocyte_like_tumor	NA	Pri_Recurrence_after_TMZ	1p_19q_codeleted	CNA_Group_ 2	5.3828671805166699E-2	-8.5110649359111008E-3	S
A_CGGTGAAGACTAAAGT-1	5	KM4242_01	3	Primary	3 --> 3	NPC_like_and_DNA_damage	G3	Pri_Recurrence_after_TMZ	1p_19q_codeleted	CNA_Group_ 1	2.8432256701568798E-4	-3.2958579799603198E-2	S
A_CGGTGCAGATAGAACG-1	4	KM4242_01	3	Primary	3 --> 3	Pericyte_Endothelial	Pericyte_Endothelial	Pri_Recurrence_after_TMZ	1p_19q_codeleted	CNA_Group_ 1	8.7758793372947799E-2	7.1598400610637894E-2	S
A_CGGTGCGCGTTGGTCC-1	5	KM4242_01	3	Primary	3 --> 3	NPC_like_and_DNA_damage	G3	Pri_Recurrence_after_TMZ	1p_19q_codeleted	CNA_Group_ 1	6.8998567029566693E-2	-5.21793387527461E-2	S
A_CGGTTGACCTGGCATA-1	0	KM4242_01	3	Primary	3 --> 3	Proneural_OPC_like_tumor	G3	Pri_Recurrence_after_TMZ	1p_19q_codeleted	CNA_Group_ 1	0.138869105768757	1.1690145648165E-2	S
A_CGTACCTGATAGGCCT-1	1	KM4242_01	3	Primary	3 --> 3	Oligodendrocyte_like_tumor	NA	Pri_Recurrence_after_TMZ	1p_19q_codeleted	CNA_Group_ 2	-2.4515585447234301E-2	2.3799377207078101E-2	G2M
A_CGTAGAGAGTAATTAT-1	0	KM4242_01	3	Primary	3 --> 3	Proneural_OPC_like_tumor	G3	Pri_Recurrence_after_TMZ	1p_19q_codeleted	CNA_Group_ 1	1.4219087660717399E-2	4.11243921099224E-2	G2M
A_CGTATTAAGAGATCTA-1	0	KM4242_01	3	Primary	3 --> 3	Proneural_OPC_like_tumor	G3	Pri_Recurrence_after_TMZ	1p_19q_codeleted	CNA_Group_ 1	6.6591737032770895E-2	-2.0469835942783701E-2	S
A_CGTCAAGGCTATAAAT-1	0	KM4242_01	3	Primary	3 --> 3	Proneural_OPC_like_tumor	G3	Pri_Recurrence_after_TMZ	1p_19q_codeleted	CNA_Group_ 1	-2.2968279552434401E-2	2.1897934291177298E-2	G2M
A_CGTCACGTCCATTGGT-1	5	KM4242_01	3	Primary	3 --> 3	NPC_like_and_DNA_damage	G3	Pri_Recurrence_after_TMZ	1p_19q_codeleted	CNA_Group_ 1	-8.5048154977374994E-3	-3.3118445394005103E-2	G1
A_CGTCGCATGTGAGCCA-1	5	KM4242_01	3	Primary	3 --> 3	NPC_like_and_DNA_damage	G3	Pri_Recurrence_after_TMZ	1p_19q_codeleted	CNA_Group_ 3	3.6363972826292099E-2	-4.6022517110767602E-2	S
A_CGTCGTCCTTCGCGAA-1	0	KM4242_01	3	Primary	3 --> 3	Proneural_OPC_like_tumor	G3	Pri_Recurrence_after_TMZ	1p_19q_codeleted	CNA_Group_ 1	-1.1483929978518799E-2	1.133618182118E-2	G2M
A_CGTCTGGAAGGGCCCG-1	1	KM4242_01	3	Primary	3 --> 3	Oligodendrocyte_like_tumor	NA	Pri_Recurrence_after_TMZ	1p_19q_codeleted	CNA_Group_ 3	2.5349446477228098E-2	-1.5640184594122499E-2	S
A_CGTGAAGTTAATTCAC-1	0	KM4242_01	3	Primary	3 --> 3	Proneural_OPC_like_tumor	G3	Pri_Recurrence_after_TMZ	1p_19q_codeleted	CNA_Group_ 1	8.3731770542269698E-2	-4.92653021162743E-2	S
A_CGTGCAGACTGGGACA-1	0	KM4242_01	3	Primary	3 --> 3	Proneural_OPC_like_tumor	NA	Pri_Recurrence_after_TMZ	1p_19q_codeleted	CNA_Group_ 3	2.6068941565019901E-2	4.3759948002554998E-2	G2M
A_CGTGCATTGTCGACGC-1	5	KM4242_01	3	Primary	3 --> 3	NPC_like_and_DNA_damage	G3	Pri_Recurrence_after_TMZ	1p_19q_codeleted	CNA_Group_ 1	4.8439068585115298E-2	1.13153692090543E-2	S
A_CGTGCCCTCCCGAAGA-1	0	KM4242_01	3	Primary	3 --> 3	Proneural_OPC_like_tumor	NA	Pri_Recurrence_after_TMZ	1p_19q_codeleted	CNA_Group_ 1	5.7449853384466898E-2	-1.0954110460228801E-2	S
A_CGTGTCCCATTCGCGA-1	0	KM4242_01	3	Primary	3 --> 3	Proneural_OPC_like_tumor	G3	Pri_Recurrence_after_TMZ	1p_19q_codeleted	CNA_Group_ 1	9.9961698018639494E-3	-2.5629875691597099E-2	S
A_CGTTAATGTCCCGACG-1	0	KM4242_01	3	Primary	3 --> 3	Proneural_OPC_like_tumor	G3	Pri_Recurrence_after_TMZ	1p_19q_codeleted	CNA_Group_ 1	3.9921507215062702E-4	2.2572693768548299E-2	G2M
A_CGTTCAGACCCGCGAA-1	0	KM4242_01	3	Primary	3 --> 3	Proneural_OPC_like_tumor	G3	Pri_Recurrence_after_TMZ	1p_19q_codeleted	CNA_Group_ 1	4.5955133607048799E-3	-1.09112073731626E-4	S
A_CGTTGAATACCGCGCT-1	0	KM4242_01	3	Primary	3 --> 3	Proneural_OPC_like_tumor	G3	Pri_Recurrence_after_TMZ	1p_19q_codeleted	CNA_Group_ 3	8.6636401577632194E-2	-2.03396141909069E-2	S
A_CGTTGAGCGACCGTCG-1	0	KM4242_01	3	Primary	3 --> 3	Proneural_OPC_like_tumor	NA	Pri_Recurrence_after_TMZ	1p_19q_codeleted	CNA_Group_ 2	-1.53462391620269E-2	-3.7336167687087002E-2	G1
A_CGTTGTCGGCAATTGA-1	0	KM4242_01	3	Primary	3 --> 3	Proneural_OPC_like_tumor	G3	Pri_Recurrence_after_TMZ	1p_19q_codeleted	CNA_Group_ 2	6.2433412838240901E-2	2.1941130634176902E-2	S
A_CGTTGTTTCAATTCCC-1	0	KM4242_01	3	Primary	3 --> 3	Proneural_OPC_like_tumor	G3	Pri_Recurrence_after_TMZ	1p_19q_codeleted	CNA_Group_ 1	2.9315850736120499E-2	-2.8137206478759499E-2	S
A_CGTTTAAGCGGAGCAC-1	1	KM4242_01	3	Primary	3 --> 3	Oligodendrocyte_like_tumor	NA	Pri_Recurrence_after_TMZ	1p_19q_codeleted	CNA_Group_ 2	-4.4764744814627097E-2	3.7137829816765201E-2	G2M
A_CGTTTCGCTCATTACA-1	0	KM4242_01	3	Primary	3 --> 3	Proneural_OPC_like_tumor	G3	Pri_Recurrence_after_TMZ	1p_19q_codeleted	CNA_Group_ 1	9.3443025097118604E-2	-8.18123438076164E-3	S
A_CTAAAGAATGCCTACT-1	0	KM4242_01	3	Primary	3 --> 3	Proneural_OPC_like_tumor	G3	Pri_Recurrence_after_TMZ	1p_19q_codeleted	CNA_Group_ 1	1.11697598253597E-2	-2.49814216937146E-2	S
A_CTAAAGGGAAATAGGA-1	0	KM4242_01	3	Primary	3 --> 3	Proneural_OPC_like_tumor	G3	Pri_Recurrence_after_TMZ	1p_19q_codeleted	CNA_Group_ 1	4.1259639169261099E-2	1.74262565575262E-3	S
A_CTAAATCCTATTCCGG-1	1	KM4242_01	3	Primary	3 --> 3	Oligodendrocyte_like_tumor	NA	Pri_Recurrence_after_TMZ	1p_19q_codeleted	CNA_Group_ 3	5.7108203280565499E-3	-1.34784139103076E-2	S
A_CTAACCGCGCGCCCGT-1	5	KM4242_01	3	Primary	3 --> 3	NPC_like_and_DNA_damage	G3	Pri_Recurrence_after_TMZ	1p_19q_codeleted	CNA_Group_ 1	-4.3120111390883099E-2	-1.4308157053359499E-2	G1
A_CTAACGAAACTTGCTG-1	1	KM4242_01	3	Primary	3 --> 3	Oligodendrocyte_like_tumor	NA	Pri_Recurrence_after_TMZ	1p_19q_codeleted	CNA_Group_ 3	1.20372973986259E-2	-4.8925984887375502E-3	S
A_CTAAGGGAATGATTGG-1	0	KM4242_01	3	Primary	3 --> 3	Proneural_OPC_like_tumor	G3	Pri_Recurrence_after_TMZ	1p_19q_codeleted	CNA_Group_ 1	0.11718980757355101	3.65955520694171E-2	S
A_CTAATTCGCACGCGCT-1	0	KM4242_01	3	Primary	3 --> 3	Proneural_OPC_like_tumor	G3	Pri_Recurrence_after_TMZ	1p_19q_codeleted	CNA_Group_ 3	7.6407650482148301E-2	-4.3904369050704703E-2	S
A_CTACCCTAAGGTCATA-1	1	KM4242_01	3	Primary	3 --> 3	Oligodendrocyte_like_tumor	NA	Pri_Recurrence_after_TMZ	1p_19q_codeleted	CNA_Group_ 2	-6.7186633882046903E-2	-1.4984341349065801E-2	G1
A_CTACGACTAGCTATAA-1	5	KM4242_01	3	Primary	3 --> 3	NPC_like_and_DNA_damage	G3	Pri_Recurrence_after_TMZ	1p_19q_codeleted	CNA_Group_ 1	2.8212645032831999E-2	-1.0867992346323099E-3	S
A_CTACGCACGGAGTACC-1	0	KM4242_01	3	Primary	3 --> 3	Proneural_OPC_like_tumor	G3	Pri_Recurrence_after_TMZ	1p_19q_codeleted	CNA_Group_ 1	9.0546208833058705E-3	-3.3100325281454297E-2	S
A_CTACTATCTTTCAGAG-1	1	KM4242_01	3	Primary	3 --> 3	Oligodendrocyte_like_tumor	NA	Pri_Recurrence_after_TMZ	1p_19q_codeleted	CNA_Group_ 3	-2.6520153701924599E-2	1.4885202094996899E-4	G2M
A_CTACTCTAGGCCCGGC-1	0	KM4242_01	3	Primary	3 --> 3	Proneural_OPC_like_tumor	G3	Pri_Recurrence_after_TMZ	1p_19q_codeleted	CNA_Group_ 3	-3.7476946209201299E-2	-4.5538361151947801E-2	G1
A_CTACTGCCACCTGACC-1	1	KM4242_01	3	Primary	3 --> 3	Oligodendrocyte_like_tumor	NA	Pri_Recurrence_after_TMZ	1p_19q_codeleted	CNA_Group_ 3	1.1407163669670099E-3	1.6403010294818901E-2	G2M
A_CTAGATTTACGACGGC-1	0	KM4242_01	3	Primary	3 --> 3	Proneural_OPC_like_tumor	NA	Pri_Recurrence_after_TMZ	1p_19q_codeleted	CNA_Group_ 1	3.5020082758067603E-2	3.3306413892549097E-2	S
A_CTAGCATAGTATAATG-1	0	KM4242_01	3	Primary	3 --> 3	Proneural_OPC_like_tumor	NA	Pri_Recurrence_after_TMZ	1p_19q_codeleted	CNA_Group_ 1	6.83369727124363E-2	9.6442238272042999E-2	G2M
A_CTAGGTTCGGACGTGA-1	0	KM4242_01	3	Primary	3 --> 3	Proneural_OPC_like_tumor	G3	Pri_Recurrence_after_TMZ	1p_19q_codeleted	CNA_Group_ 2	1.55845158860094E-2	8.5657171445332095E-2	G2M
A_CTAGTAGAAAGGGATT-1	0	KM4242_01	3	Primary	3 --> 3	Proneural_OPC_like_tumor	G3	Pri_Recurrence_after_TMZ	1p_19q_codeleted	CNA_Group_ 1	2.0406679904769801E-2	-9.4009599041215003E-3	S
A_CTAGTCACGTCTTAAG-1	0	KM4242_01	3	Primary	3 --> 3	Proneural_OPC_like_tumor	NA	Pri_Recurrence_after_TMZ	1p_19q_codeleted	CNA_Group_ 1	-4.4332051094491801E-2	3.3178527538198603E-2	G2M
A_CTAGTGAAGGACAGGA-1	4	KM4242_01	3	Primary	3 --> 3	Pericyte_Endothelial	Pericyte_Endothelial	Pri_Recurrence_after_TMZ	1p_19q_codeleted	CNA_Group_ 1	-1.5092724716208501E-2	1.43400131791727E-2	G2M
A_CTAGTTACAACCCGGT-1	0	KM4242_01	3	Primary	3 --> 3	Proneural_OPC_like_tumor	G3	Pri_Recurrence_after_TMZ	1p_19q_codeleted	CNA_Group_ 2	-1.13713261975253E-3	-1.0258552786842399E-2	G1
A_CTAGTTGGGCCCGGTA-1	1	KM4242_01	3	Primary	3 --> 3	Oligodendrocyte_like_tumor	NA	Pri_Recurrence_after_TMZ	1p_19q_codeleted	CNA_Group_ 2	-5.8930005804722096E-4	3.3976088381836703E-2	G2M
A_CTATCGGGTCTCAACA-1	0	KM4242_01	3	Primary	3 --> 3	Proneural_OPC_like_tumor	NA	Pri_Recurrence_after_TMZ	1p_19q_codeleted	CNA_Group_ 1	9.3494444851048505E-2	-6.4820061718372804E-2	S
A_CTATGCCCGAATGCAA-1	0	KM4242_01	3	Primary	3 --> 3	Proneural_OPC_like_tumor	G3	Pri_Recurrence_after_TMZ	1p_19q_codeleted	CNA_Group_ 1	-6.7480229806330698E-3	-2.8218135575179E-2	G1
A_CTATGTCACTAGCCCA-1	1	KM4242_01	3	Primary	3 --> 3	Oligodendrocyte_like_tumor	NA	Pri_Recurrence_after_TMZ	1p_19q_codeleted	CNA_Group_ 1	-3.2441902554617298E-2	7.0339341720615803E-2	G2M
A_CTATTCATGTGTCCCA-1	0	KM4242_01	3	Primary	3 --> 3	Proneural_OPC_like_tumor	G3	Pri_Recurrence_after_TMZ	1p_19q_codeleted	CNA_Group_ 2	3.2698612118667002E-2	-4.9389416422867798E-3	S
A_CTATTTGGTTACGGAT-1	1	KM4242_01	3	Primary	3 --> 3	Oligodendrocyte_like_tumor	NA	Pri_Recurrence_after_TMZ	1p_19q_codeleted	CNA_Group_ 3	1.6086290293224802E-2	3.4278828123216698E-2	G2M
A_CTCAACTAACCCGGAT-1	0	KM4242_01	3	Primary	3 --> 3	Proneural_OPC_like_tumor	G3	Pri_Recurrence_after_TMZ	1p_19q_codeleted	CNA_Group_ 1	0.10154099857486	4.25334539526043E-2	S
A_CTCACATTTACTAAAT-1	0	KM4242_01	3	Primary	3 --> 3	Proneural_OPC_like_tumor	G3	Pri_Recurrence_after_TMZ	1p_19q_codeleted	CNA_Group_ 2	6.8258173792746707E-2	-3.6427209124600103E-2	S
A_CTCACTGTGATACTTA-1	0	KM4242_01	3	Primary	3 --> 3	Proneural_OPC_like_tumor	G3	Pri_Recurrence_after_TMZ	1p_19q_codeleted	CNA_Group_ 3	4.4372756909859201E-2	7.1163547269323807E-2	G2M
A_CTCACTTGGCTGGTAA-1	0	KM4242_01	3	Primary	3 --> 3	Proneural_OPC_like_tumor	G3	Pri_Recurrence_after_TMZ	1p_19q_codeleted	CNA_Group_ 1	-1.9508910354320199E-2	-3.2751345553351803E-2	G1
A_CTCATTGCTCTAACAA-1	0	KM4242_01	3	Primary	3 --> 3	Proneural_OPC_like_tumor	G3	Pri_Recurrence_after_TMZ	1p_19q_codeleted	CNA_Group_ 1	-8.6203779848740003E-3	-3.63957824076527E-4	G1
A_CTCATTTGATGGGCGG-1	1	KM4242_01	3	Primary	3 --> 3	Oligodendrocyte_like_tumor	NA	Pri_Recurrence_after_TMZ	1p_19q_codeleted	CNA_Group_ 3	-1.0281445635099E-2	2.4201888862386001E-2	G2M
A_CTCCGCCCACATGAGG-1	0	KM4242_01	3	Primary	3 --> 3	Proneural_OPC_like_tumor	G3	Pri_Recurrence_after_TMZ	1p_19q_codeleted	CNA_Group_ 1	-2.5812747378967299E-2	-4.1976454245143499E-2	G1
A_CTCCGGCCTAATATGC-1	1	KM4242_01	3	Primary	3 --> 3	Oligodendrocyte_like_tumor	NA	Pri_Recurrence_after_TMZ	1p_19q_codeleted	CNA_Group_ 4	3.8826890550581201E-2	-5.8044165531520898E-2	S
A_CTCGAGGTCGAACAGT-1	0	KM4242_01	3	Primary	3 --> 3	Proneural_OPC_like_tumor	NA	Pri_Recurrence_after_TMZ	1p_19q_codeleted	CNA_Group_ 1	1.7470222504857899E-2	1.20849743864169E-2	S
A_CTCGCACCTATATAGT-1	1	KM4242_01	3	Primary	3 --> 3	Oligodendrocyte_like_tumor	NA	Pri_Recurrence_after_TMZ	1p_19q_codeleted	CNA_Group_ 2	-1.2709010164543601E-3	-2.69019547020929E-2	G1
A_CTCGCCGAATGTAGGG-1	0	KM4242_01	3	Primary	3 --> 3	Proneural_OPC_like_tumor	G3	Pri_Recurrence_after_TMZ	NA	NA	-3.09535826224525E-2	-3.3974089882026798E-2	G1
A_CTCGGTACCACTGCTC-1	1	KM4242_01	3	Primary	3 --> 3	Oligodendrocyte_like_tumor	NA	Pri_Recurrence_after_TMZ	1p_19q_codeleted	CNA_Group_ 3	2.1029607246850199E-2	5.5642411745354697E-2	G2M
A_CTCGGTCCGTAGCCTG-1	2	KM4242_01	3	Primary	3 --> 3	NPC_like_tumor	Neurons	Pri_Recurrence_after_TMZ	non_tumor	NA	3.1798111275413099E-2	1.455159007829E-3	S
A_CTCGTCTGTGCCTTCG-1	0	KM4242_01	3	Primary	3 --> 3	Proneural_OPC_like_tumor	G3	Pri_Recurrence_after_TMZ	1p_19q_codeleted	CNA_Group_ 1	5.9325745612561299E-2	-6.6791037358507596E-2	S
A_CTCTAGCCCTCGGAAA-1	0	KM4242_01	3	Primary	3 --> 3	Proneural_OPC_like_tumor	G3	Pri_Recurrence_after_TMZ	1p_19q_codeleted	CNA_Group_ 1	5.2192996079823403E-2	0.125578584328773	G2M
A_CTCTATTTGGCTGCAG-1	0	KM4242_01	3	Primary	3 --> 3	Proneural_OPC_like_tumor	G3	Pri_Recurrence_after_TMZ	1p_19q_codeleted	CNA_Group_ 3	-4.2693861377565201E-2	-1.6788038229714201E-2	G1
A_CTCTCACAATCGATGA-1	1	KM4242_01	3	Primary	3 --> 3	Oligodendrocyte_like_tumor	NA	Pri_Recurrence_after_TMZ	1p_19q_codeleted	CNA_Group_ 3	1.09389875381512E-2	-8.6102995095823903E-3	S
A_CTCTGGACGCCTGGTG-1	0	KM4242_01	3	Primary	3 --> 3	Proneural_OPC_like_tumor	NA	Pri_Recurrence_after_TMZ	1p_19q_codeleted	CNA_Group_ 1	7.6404353251229504E-2	2.83582189583052E-2	S
A_CTCTGTTTGAGGATTC-1	1	KM4242_01	3	Primary	3 --> 3	Oligodendrocyte_like_tumor	NA	Pri_Recurrence_after_TMZ	1p_19q_codeleted	CNA_Group_ 2	-4.16004287049472E-2	-2.8241937340835101E-2	G1
A_CTCTTGTCCCGCTTGG-1	0	KM4242_01	3	Primary	3 --> 3	Proneural_OPC_like_tumor	G3	Pri_Recurrence_after_TMZ	1p_19q_codeleted	CNA_Group_ 1	-4.94784375311286E-2	-3.9374019529711798E-2	G1
A_CTGAAAGAGATCCGAC-1	1	KM4242_01	3	Primary	3 --> 3	Oligodendrocyte_like_tumor	NA	Pri_Recurrence_after_TMZ	1p_19q_codeleted	CNA_Group_ 3	-4.0978548654846098E-2	6.4644662752710705E-2	G2M
A_CTGAATCCGAGACCTC-1	0	KM4242_01	3	Primary	3 --> 3	Proneural_OPC_like_tumor	G3	Pri_Recurrence_after_TMZ	1p_19q_codeleted	CNA_Group_ 2	6.8773629266648498E-2	-6.3265063857923201E-2	S
A_CTGATAGTGTATCTCA-1	2	KM4242_01	3	Primary	3 --> 3	NPC_like_tumor	G3	Pri_Recurrence_after_TMZ	non_tumor	NA	-4.2666674125724197E-2	-1.7478943851014801E-2	G1
A_CTGCACAACTACATAT-1	6	KM4242_01	3	Primary	3 --> 3	IEG	G3	Pri_Recurrence_after_TMZ	1p_19q_codeleted	CNA_Group_ 1	-3.2984900227298102E-2	-1.6388890506308599E-2	G1
A_CTGCACCTGGAACCGC-1	1	KM4242_01	3	Primary	3 --> 3	Oligodendrocyte_like_tumor	NA	Pri_Recurrence_after_TMZ	1p_19q_codeleted	CNA_Group_ 3	1.9073587266296099E-2	2.4555195830859599E-3	S
A_CTGCACTCCAGTACAG-1	0	KM4242_01	3	Primary	3 --> 3	Proneural_OPC_like_tumor	G3	Pri_Recurrence_after_TMZ	1p_19q_codeleted	CNA_Group_ 2	2.37021547375415E-2	2.1485731122716199E-2	S
A_CTGCCAAGGTTGGAAG-1	1	KM4242_01	3	Primary	3 --> 3	Oligodendrocyte_like_tumor	NA	Pri_Recurrence_after_TMZ	1p_19q_codeleted	CNA_Group_ 3	-8.50720256594782E-3	-2.2898276179661101E-2	G1
A_CTGCCATGCATCACAT-1	0	KM4242_01	3	Primary	3 --> 3	Proneural_OPC_like_tumor	G3	Pri_Recurrence_after_TMZ	1p_19q_codeleted	CNA_Group_ 1	3.4588615556829398E-2	4.6305436838856399E-2	G2M
A_CTGCGGGTGAAATGTT-1	0	KM4242_01	3	Primary	3 --> 3	Proneural_OPC_like_tumor	G3	Pri_Recurrence_after_TMZ	1p_19q_codeleted	CNA_Group_ 1	9.9256287586802997E-3	-7.1674182235657496E-2	S
A_CTGCTTGGCGATAGCT-1	0	KM4242_01	3	Primary	3 --> 3	Proneural_OPC_like_tumor	G3	Pri_Recurrence_after_TMZ	1p_19q_codeleted	CNA_Group_ 1	-1.0127305786371299E-2	4.3892143267305998E-2	G2M
A_CTGGAAATGGATGCTT-1	0	KM4242_01	3	Primary	3 --> 3	Proneural_OPC_like_tumor	G3	Pri_Recurrence_after_TMZ	1p_19q_codeleted	CNA_Group_ 1	-3.3041741394523601E-2	-1.10048446983931E-2	G1
A_CTGGAAGACACGGTGG-1	3	KM4242_01	3	Primary	3 --> 3	RBCs	RBCs	Pri_Recurrence_after_TMZ	1p_19q_codeleted	CNA_Group_ 1	0.123211661583581	1.44148984792675e-05	S
A_CTGGATTTACACTTGA-1	0	KM4242_01	3	Primary	3 --> 3	Proneural_OPC_like_tumor	G3	Pri_Recurrence_after_TMZ	1p_19q_codeleted	CNA_Group_ 1	-3.4799587359335603E-2	7.0112887839849397E-2	G2M
A_CTGGCGACATAAGTCC-1	1	KM4242_01	3	Primary	3 --> 3	Oligodendrocyte_like_tumor	NA	Pri_Recurrence_after_TMZ	1p_19q_codeleted	CNA_Group_ 3	1.45295226947353E-2	-3.7415487118188401E-2	S
A_CTGGCGCACAGGTCTG-1	1	KM4242_01	3	Primary	3 --> 3	Oligodendrocyte_like_tumor	NA	Pri_Recurrence_after_TMZ	1p_19q_codeleted	CNA_Group_ 3	-3.7424245326085598E-2	-7.0061228258502695E-2	G1
A_CTGGCTGGTTGTCAGT-1	0	KM4242_01	3	Primary	3 --> 3	Proneural_OPC_like_tumor	G3	Pri_Recurrence_after_TMZ	1p_19q_codeleted	CNA_Group_ 1	1.22441556923633E-2	-2.7128418206055001E-2	S
A_CTGGGATAAATAATGG-1	1	KM4242_01	3	Primary	3 --> 3	Oligodendrocyte_like_tumor	NA	Pri_Recurrence_after_TMZ	1p_19q_codeleted	CNA_Group_ 3	1.2377649046089701E-2	-2.51794675413574E-2	S
A_CTGGGCCTGCTATATC-1	0	KM4242_01	3	Primary	3 --> 3	Proneural_OPC_like_tumor	G3	Pri_Recurrence_after_TMZ	1p_19q_codeleted	CNA_Group_ 1	7.7103141124873695E-2	7.9829969272441903E-3	S
A_CTGGGTAGGCAGTTAA-1	4	KM4242_01	3	Primary	3 --> 3	Pericyte_Endothelial	Pericyte_Endothelial	Pri_Recurrence_after_TMZ	1p_19q_codeleted	CNA_Group_ 1	-1.5914568932320801E-2	1.0629042701306501E-2	G2M
A_CTGGTAACACATAGAA-1	1	KM4242_01	3	Primary	3 --> 3	Oligodendrocyte_like_tumor	NA	Pri_Recurrence_after_TMZ	1p_19q_codeleted	CNA_Group_ 2	1.21607125838869E-2	-2.2907400375468401E-2	S
A_CTGTACTTCTTAGCAT-1	0	KM4242_01	3	Primary	3 --> 3	Proneural_OPC_like_tumor	G3	Pri_Recurrence_after_TMZ	1p_19q_codeleted	CNA_Group_ 1	2.7899242749833301E-2	9.4976724222387305E-3	S
A_CTGTATGGTGTAGAAA-1	0	KM4242_01	3	Primary	3 --> 3	Proneural_OPC_like_tumor	G3	Pri_Recurrence_after_TMZ	1p_19q_codeleted	CNA_Group_ 1	3.0260350354261001E-2	2.0520025844455999E-2	S
A_CTGTCAAATGGCTCGG-1	1	KM4242_01	3	Primary	3 --> 3	Oligodendrocyte_like_tumor	NA	Pri_Recurrence_after_TMZ	1p_19q_codeleted	CNA_Group_ 3	7.9264351471622405E-2	-8.4538213576546006E-3	S
A_CTGTGCAGGGTAGGTC-1	0	KM4242_01	3	Primary	3 --> 3	Proneural_OPC_like_tumor	NA	Pri_Recurrence_after_TMZ	1p_19q_codeleted	CNA_Group_ 1	-6.5502650814250399E-2	3.4716960646862603E-2	G2M
A_CTGTTACCCAATCTAG-1	0	KM4242_01	3	Primary	3 --> 3	Proneural_OPC_like_tumor	G3	Pri_Recurrence_after_TMZ	1p_19q_codeleted	CNA_Group_ 4	1.7976546223550601E-2	1.4232740343800101E-3	S
A_CTGTTCACTGCCTGTG-1	1	KM4242_01	3	Primary	3 --> 3	Oligodendrocyte_like_tumor	NA	Pri_Recurrence_after_TMZ	1p_19q_codeleted	CNA_Group_ 2	1.4161186890056E-2	4.3837066646188298E-2	G2M
A_CTGTTCATCTCACGGG-1	2	KM4242_01	3	Primary	3 --> 3	NPC_like_tumor	G3	Pri_Recurrence_after_TMZ	non_tumor	NA	4.9326115888846299E-2	-4.62582884363332E-2	S
A_CTTACACGGTATTCCA-1	0	KM4242_01	3	Primary	3 --> 3	Proneural_OPC_like_tumor	G3	Pri_Recurrence_after_TMZ	1p_19q_codeleted	CNA_Group_ 1	8.48300865584726E-2	-1.1377429606523101E-2	S
A_CTTACACTGGGAAATA-1	1	KM4242_01	3	Primary	3 --> 3	Oligodendrocyte_like_tumor	NA	Pri_Recurrence_after_TMZ	1p_19q_codeleted	CNA_Group_ 2	-3.7566698249150198E-4	-2.5619181343177901E-2	G1
A_CTTAGCCTTCCACATG-1	1	KM4242_01	3	Primary	3 --> 3	Oligodendrocyte_like_tumor	NA	Pri_Recurrence_after_TMZ	1p_19q_codeleted	CNA_Group_ 3	1.27156970830736E-2	-6.8881736832891796E-2	S
A_CTTAGTGTAGTAGCAT-1	6	KM4242_01	3	Primary	3 --> 3	IEG	G3	Pri_Recurrence_after_TMZ	1p_19q_codeleted	CNA_Group_ 1	4.90938222917452E-2	-1.5666592776891902E-2	S
A_CTTCAACTCCACTTGG-1	0	KM4242_01	3	Primary	3 --> 3	Proneural_OPC_like_tumor	G3	Pri_Recurrence_after_TMZ	1p_19q_codeleted	CNA_Group_ 2	5.1506658146745999E-3	-4.7772958018816704E-3	S
A_CTTCATAGCTCAAGAA-1	2	KM4242_01	3	Primary	3 --> 3	NPC_like_tumor	G3	Pri_Recurrence_after_TMZ	non_tumor	NA	-4.5755685261697703E-2	2.7085636784744599E-2	G2M
A_CTTCATTGTCAGTGGA-1	0	KM4242_01	3	Primary	3 --> 3	Proneural_OPC_like_tumor	G3	Pri_Recurrence_after_TMZ	1p_19q_codeleted	CNA_Group_ 1	2.62057918226191E-2	1.5434221058760401E-2	S
A_CTTCCGCTCCGTGAAG-1	0	KM4242_01	3	Primary	3 --> 3	Proneural_OPC_like_tumor	G3	Pri_Recurrence_after_TMZ	1p_19q_codeleted	CNA_Group_ 1	5.0772976438473297E-2	-7.5808953477484703E-2	S
A_CTTCGATTGCGCAAGC-1	0	KM4242_01	3	Primary	3 --> 3	Proneural_OPC_like_tumor	G3	Pri_Recurrence_after_TMZ	1p_19q_codeleted	CNA_Group_ 1	7.7272422738478105E-2	-4.3661166014325001E-2	S
A_CTTCGTAGATAGGTGA-1	0	KM4242_01	3	Primary	3 --> 3	Proneural_OPC_like_tumor	G3	Pri_Recurrence_after_TMZ	1p_19q_codeleted	CNA_Group_ 1	8.4609456274583703E-2	-3.06739366591142E-2	S
A_CTTCTATGTTGAAGTA-1	0	KM4242_01	3	Primary	3 --> 3	Proneural_OPC_like_tumor	G3	Pri_Recurrence_after_TMZ	1p_19q_codeleted	CNA_Group_ 1	1.70937834276771E-2	-1.32550057770789E-2	S
A_CTTCTTACGTCGTATA-1	1	KM4242_01	3	Primary	3 --> 3	Oligodendrocyte_like_tumor	NA	Pri_Recurrence_after_TMZ	1p_19q_codeleted	CNA_Group_ 2	1.7425391808013401E-2	-2.9489425556736899E-2	S
A_CTTGCAACCGCCTCCT-1	0	KM4242_01	3	Primary	3 --> 3	Proneural_OPC_like_tumor	G3	Pri_Recurrence_after_TMZ	1p_19q_codeleted	CNA_Group_ 1	1.0255512770558899E-2	-4.2145323729201697E-2	S
A_CTTGCCCAGGCTCTAC-1	0	KM4242_01	3	Primary	3 --> 3	Proneural_OPC_like_tumor	G3	Pri_Recurrence_after_TMZ	1p_19q_codeleted	CNA_Group_ 1	-6.1753032638085098E-2	2.0874633277295E-2	G2M
A_CTTGGCCAAGCTGGGA-1	0	KM4242_01	3	Primary	3 --> 3	Proneural_OPC_like_tumor	G3	Pri_Recurrence_after_TMZ	1p_19q_codeleted	CNA_Group_ 2	3.2002205345277097E-2	2.51681277012704E-3	S
A_CTTGTACTTGTTGACT-1	0	KM4242_01	3	Primary	3 --> 3	Proneural_OPC_like_tumor	NA	Pri_Recurrence_after_TMZ	1p_19q_codeleted	CNA_Group_ 1	3.5408239633605502E-2	-3.9050574913368399E-2	S
A_CTTGTCAACATTCGAG-1	0	KM4242_01	3	Primary	3 --> 3	Proneural_OPC_like_tumor	G3	Pri_Recurrence_after_TMZ	1p_19q_codeleted	CNA_Group_ 1	3.6459176172859403E-2	-3.48819468256968E-2	S
A_CTTGTGCTCACCGATT-1	1	KM4242_01	3	Primary	3 --> 3	Oligodendrocyte_like_tumor	NA	Pri_Recurrence_after_TMZ	1p_19q_codeleted	CNA_Group_ 3	4.2024876055354099E-2	1.60623224810552E-2	S
A_CTTGTTGCTGAGTCAA-1	1	KM4242_01	3	Primary	3 --> 3	Oligodendrocyte_like_tumor	NA	Pri_Recurrence_after_TMZ	1p_19q_codeleted	CNA_Group_ 3	4.15060685993432E-2	-4.1934686008769102E-2	S
A_CTTTAACTTTCAAAGG-1	1	KM4242_01	3	Primary	3 --> 3	Oligodendrocyte_like_tumor	NA	Pri_Recurrence_after_TMZ	1p_19q_codeleted	CNA_Group_ 3	6.9271562358407798E-2	4.8946696216280205E-4	S
A_CTTTAATATTGGTCGA-1	0	KM4242_01	3	Primary	3 --> 3	Proneural_OPC_like_tumor	G3	Pri_Recurrence_after_TMZ	1p_19q_codeleted	CNA_Group_ 1	1.26159567364855E-2	4.15665141260778E-2	G2M
A_CTTTACCGAATAGTAG-1	0	KM4242_01	3	Primary	3 --> 3	Proneural_OPC_like_tumor	NA	Pri_Recurrence_after_TMZ	1p_19q_codeleted	CNA_Group_ 1	1.2259302774831801E-2	-3.0128806469485299E-2	S
A_CTTTAGGAACACTGTT-1	1	KM4242_01	3	Primary	3 --> 3	Oligodendrocyte_like_tumor	NA	Pri_Recurrence_after_TMZ	1p_19q_codeleted	CNA_Group_ 3	-3.8822528740721403E-2	2.4733769386119101E-2	G2M
A_CTTTAGTGCTATTATT-1	0	KM4242_01	3	Primary	3 --> 3	Proneural_OPC_like_tumor	G3	Pri_Recurrence_after_TMZ	1p_19q_codeleted	CNA_Group_ 2	4.02383523074498E-2	-5.4678531465511097E-2	S
A_CTTTCTGTGCGGGCTT-1	0	KM4242_01	3	Primary	3 --> 3	Proneural_OPC_like_tumor	G3	Pri_Recurrence_after_TMZ	1p_19q_codeleted	CNA_Group_ 1	-3.4292809028662802E-2	-5.5418267591792601E-2	G1
A_CTTTGGCGCTTTATAC-1	2	KM4242_01	3	Primary	3 --> 3	NPC_like_tumor	G3	Pri_Recurrence_after_TMZ	non_tumor	NA	4.1039177794661298E-2	-4.94804781300743E-2	S
A_CTTTGGCTTTAGTAAA-1	0	KM4242_01	3	Primary	3 --> 3	Proneural_OPC_like_tumor	G3	Pri_Recurrence_after_TMZ	1p_19q_codeleted	CNA_Group_ 1	2.2070265905175402E-3	9.9629410501479998E-3	G2M
A_GAAACAGATGACCACC-1	1	KM4242_01	3	Primary	3 --> 3	Oligodendrocyte_like_tumor	NA	Pri_Recurrence_after_TMZ	1p_19q_codeleted	CNA_Group_ 3	-7.0206385104022606E-2	-1.11949446252878E-3	G1
A_GAAACAGCCATGCAGT-1	1	KM4242_01	3	Primary	3 --> 3	Oligodendrocyte_like_tumor	NA	Pri_Recurrence_after_TMZ	1p_19q_codeleted	CNA_Group_ 3	-4.5277016797932501E-2	-3.3847694387091398E-2	G1
A_GAAACCGAATTACCTT-1	0	KM4242_01	3	Primary	3 --> 3	Proneural_OPC_like_tumor	G3	Pri_Recurrence_after_TMZ	1p_19q_codeleted	CNA_Group_ 1	4.6077524835892503E-2	5.0582467401962698E-2	G2M
A_GAAACTCGTGCGATGC-1	0	KM4242_01	3	Primary	3 --> 3	Proneural_OPC_like_tumor	G3	Pri_Recurrence_after_TMZ	1p_19q_codeleted	CNA_Group_ 3	-1.51797651173205E-2	-4.7453100836819202E-2	G1
A_GAAAGCAGTGCACTTT-1	0	KM4242_01	3	Primary	3 --> 3	Proneural_OPC_like_tumor	G3	Pri_Recurrence_after_TMZ	1p_19q_codeleted	CNA_Group_ 2	4.2209896351776501E-2	-2.9403712508103998E-2	S
A_GAAAGCCCTTTGGACC-1	4	KM4242_01	3	Primary	3 --> 3	Pericyte_Endothelial	Pericyte_Endothelial	Pri_Recurrence_after_TMZ	1p_19q_codeleted	CNA_Group_ 1	7.1289905685499894E-2	-4.19705969355769E-2	S
A_GAAAGTGACTAACTGC-1	0	KM4242_01	3	Primary	3 --> 3	Proneural_OPC_like_tumor	G3	Pri_Recurrence_after_TMZ	1p_19q_codeleted	CNA_Group_ 3	-3.3491647591557303E-2	-1.9074122929310301E-2	G1
A_GAAATATCACCATCAG-1	0	KM4242_01	3	Primary	3 --> 3	Proneural_OPC_like_tumor	G3	Pri_Recurrence_after_TMZ	1p_19q_codeleted	CNA_Group_ 1	-1.30728787341809E-2	-2.04306481341823E-2	G1
A_GAAATCGCGCGCAACT-1	1	KM4242_01	3	Primary	3 --> 3	Oligodendrocyte_like_tumor	NA	Pri_Recurrence_after_TMZ	1p_19q_codeleted	CNA_Group_ 2	3.4228904544963697E-2	-1.9031385293932099E-2	S
A_GAAATGGCGGTGTTAG-1	5	KM4242_01	3	Primary	3 --> 3	NPC_like_and_DNA_damage	G3	Pri_Recurrence_after_TMZ	1p_19q_codeleted	CNA_Group_ 1	4.9015927191263499E-2	1.48241394332516E-2	S
A_GAAATTGTCTCTATAA-1	0	KM4242_01	3	Primary	3 --> 3	Proneural_OPC_like_tumor	G3	Pri_Recurrence_after_TMZ	1p_19q_codeleted	CNA_Group_ 1	-1.37372322393969E-3	-3.6415329019276001E-2	G1
A_GAACAACTGGGATGAA-1	0	KM4242_01	3	Primary	3 --> 3	Proneural_OPC_like_tumor	G3	Pri_Recurrence_after_TMZ	1p_19q_codeleted	CNA_Group_ 1	-3.7405729028287801E-2	-5.6738739739747197E-2	G1
A_GAACACACATCAACCA-1	0	KM4242_01	3	Primary	3 --> 3	Proneural_OPC_like_tumor	NA	Pri_Recurrence_after_TMZ	1p_19q_codeleted	CNA_Group_ 2	0.128306179997808	0.212260017047884	G2M
A_GAACAGATTACTAAAT-1	0	KM4242_01	3	Primary	3 --> 3	Proneural_OPC_like_tumor	G3	Pri_Recurrence_after_TMZ	1p_19q_codeleted	CNA_Group_ 2	-1.18121030599169E-2	-5.0548144098527703E-2	G1
A_GAACCCTCTGTGTTCT-1	0	KM4242_01	3	Primary	3 --> 3	Proneural_OPC_like_tumor	G3	Pri_Recurrence_after_TMZ	1p_19q_codeleted	CNA_Group_ 2	2.2336320495731501E-2	6.1888364706431404E-3	S
A_GAACCTTTAACGATCC-1	0	KM4242_01	3	Primary	3 --> 3	Proneural_OPC_like_tumor	G3	Pri_Recurrence_after_TMZ	1p_19q_codeleted	CNA_Group_ 1	5.9622755967911202E-2	2.1454743734914301E-2	S
A_GAACGACCGAATGATA-1	1	KM4242_01	3	Primary	3 --> 3	Oligodendrocyte_like_tumor	NA	Pri_Recurrence_after_TMZ	1p_19q_codeleted	CNA_Group_ 3	1.59340540398724E-2	3.7340308724342901E-2	G2M
A_GAACGTCTCATGGTCG-1	4	KM4242_01	3	Primary	3 --> 3	Pericyte_Endothelial	Pericyte_Endothelial	Pri_Recurrence_after_TMZ	1p_19q_codeleted	CNA_Group_ 2	4.3412278582508602E-2	-1.7596461798801401E-2	S
A_GAACGTTAGGAAGACG-1	4	KM4242_01	3	Primary	3 --> 3	Pericyte_Endothelial	Pericyte_Endothelial	Pri_Recurrence_after_TMZ	1p_19q_codeleted	CNA_Group_ 1	-2.75443141490882E-2	-2.1422421019133601E-2	G1
A_GAAGCCACTGATTATG-1	0	KM4242_01	3	Primary	3 --> 3	Proneural_OPC_like_tumor	G3	Pri_Recurrence_after_TMZ	1p_19q_codeleted	CNA_Group_ 1	5.5695156001112002E-2	2.28185662573498E-2	S
A_GAAGCCTGCACATTCC-1	0	KM4242_01	3	Primary	3 --> 3	Proneural_OPC_like_tumor	G3	Pri_Recurrence_after_TMZ	1p_19q_codeleted	CNA_Group_ 2	5.3097021835474198E-2	7.7907977097526906E-2	G2M
A_GAAGCGTGAGGAATTT-1	0	KM4242_01	3	Primary	3 --> 3	Proneural_OPC_like_tumor	NA	Pri_Recurrence_after_TMZ	1p_19q_codeleted	CNA_Group_ 1	5.6517420589903403E-2	-7.0003357496545597E-3	S
A_GAAGCTTGCTGACCGC-1	0	KM4242_01	3	Primary	3 --> 3	Proneural_OPC_like_tumor	G3	Pri_Recurrence_after_TMZ	1p_19q_codeleted	CNA_Group_ 1	3.0850410195540901E-2	-7.03822472842002E-2	S
A_GAAGGGTCATTAAGAC-1	5	KM4242_01	3	Primary	3 --> 3	NPC_like_and_DNA_damage	G3	Pri_Recurrence_after_TMZ	1p_19q_codeleted	CNA_Group_ 1	1.15746199555274E-2	1.8489050945003901E-2	G2M
A_GAAGTCAGTTGCACTA-1	0	KM4242_01	3	Primary	3 --> 3	Proneural_OPC_like_tumor	G3	Pri_Recurrence_after_TMZ	1p_19q_codeleted	CNA_Group_ 1	0.104817609740361	3.3588071968724501E-2	S
A_GAAGTCTCCCTAGCGA-1	1	KM4242_01	3	Primary	3 --> 3	Oligodendrocyte_like_tumor	NA	Pri_Recurrence_after_TMZ	1p_19q_codeleted	CNA_Group_ 2	-2.7791712388924101E-2	-2.2530305254062698E-2	G1
A_GAAGTGATTTATCGTG-1	0	KM4242_01	3	Primary	3 --> 3	Proneural_OPC_like_tumor	G3	Pri_Recurrence_after_TMZ	1p_19q_codeleted	CNA_Group_ 1	1.1983926533508601E-2	-5.7940601061491903E-2	S
A_GAAGTGCTGGATAGCT-1	1	KM4242_01	3	Primary	3 --> 3	Oligodendrocyte_like_tumor	NA	Pri_Recurrence_after_TMZ	1p_19q_codeleted	CNA_Group_ 3	0.105980369235309	-1.45909111061178E-2	S
A_GAAGTTTCCACTCAAT-1	0	KM4242_01	3	Primary	3 --> 3	Proneural_OPC_like_tumor	G3	Pri_Recurrence_after_TMZ	1p_19q_codeleted	CNA_Group_ 1	2.83777071291249E-2	-4.3798425863471498E-2	S
A_GAATCGACATGGTCAC-1	0	KM4242_01	3	Primary	3 --> 3	Proneural_OPC_like_tumor	G3	Pri_Recurrence_after_TMZ	1p_19q_codeleted	CNA_Group_ 1	7.46545869150438E-2	1.5703782699816898E-2	S
A_GAATCTGAACATTCTC-1	0	KM4242_01	3	Primary	3 --> 3	Proneural_OPC_like_tumor	G3	Pri_Recurrence_after_TMZ	1p_19q_codeleted	CNA_Group_ 1	4.2190739107191101E-2	-1.9827915509138601E-2	S
A_GAATGCGAATCGGTTC-1	0	KM4242_01	3	Primary	3 --> 3	Proneural_OPC_like_tumor	G3	Pri_Recurrence_after_TMZ	1p_19q_codeleted	CNA_Group_ 2	-3.0130258416241899E-2	-3.3840695505702602E-2	G1
A_GAATGTGGTCCGGATT-1	0	KM4242_01	3	Primary	3 --> 3	Proneural_OPC_like_tumor	NA	Pri_Recurrence_after_TMZ	1p_19q_codeleted	CNA_Group_ 1	2.43506781427184E-2	1.28103455892036E-2	S
A_GAATGTTGGGTAATCT-1	1	KM4242_01	3	Primary	3 --> 3	Oligodendrocyte_like_tumor	NA	Pri_Recurrence_after_TMZ	1p_19q_codeleted	CNA_Group_ 5	1.1805657234128001E-2	-3.2441571326626201E-2	S
A_GAATTATAGTGAAAGG-1	1	KM4242_01	3	Primary	3 --> 3	Oligodendrocyte_like_tumor	NA	Pri_Recurrence_after_TMZ	1p_19q_codeleted	CNA_Group_ 1	-3.4148508207016699E-3	-1.4514657259578999E-2	G1
A_GAATTCACCCGGGTGT-1	0	KM4242_01	3	Primary	3 --> 3	Proneural_OPC_like_tumor	G3	Pri_Recurrence_after_TMZ	1p_19q_codeleted	CNA_Group_ 2	3.5997403514023397E-2	0.12986531833706499	G2M
A_GAATTTCTCGCTGCAG-1	5	KM4242_01	3	Primary	3 --> 3	NPC_like_and_DNA_damage	G3	Pri_Recurrence_after_TMZ	non_tumor	CNA_Group_ 1	0.10388553578859	3.7888186288704898E-2	S
A_GACAACGACCATTGAA-1	4	KM4242_01	3	Primary	3 --> 3	Pericyte_Endothelial	Pericyte_Endothelial	Pri_Recurrence_after_TMZ	1p_19q_codeleted	CNA_Group_ 3	5.1043747148560902E-3	-7.3449049692818499E-2	S
A_GACAACGCAGCTTACG-1	4	KM4242_01	3	Primary	3 --> 3	Pericyte_Endothelial	Pericyte_Endothelial	Pri_Recurrence_after_TMZ	non_tumor	CNA_Group_ 2	7.8384966091510896E-2	-1.2414506169800299E-2	S
A_GACACAAGGGAAGAAA-1	1	KM4242_01	3	Primary	3 --> 3	Oligodendrocyte_like_tumor	NA	Pri_Recurrence_after_TMZ	1p_19q_codeleted	CNA_Group_ 2	-1.3361103523571101E-2	-7.5511195515770204E-3	G1
A_GACACTGAGTTCAGTG-1	0	KM4242_01	3	Primary	3 --> 3	Proneural_OPC_like_tumor	G3	Pri_Recurrence_after_TMZ	1p_19q_codeleted	CNA_Group_ 1	5.0415335199880902E-2	-6.6216542457077296E-2	S
A_GACAGCCAGACCTGAC-1	1	KM4242_01	3	Primary	3 --> 3	Oligodendrocyte_like_tumor	NA	Pri_Recurrence_after_TMZ	1p_19q_codeleted	CNA_Group_ 3	-8.5780549361123403E-3	-1.3247612721318599E-2	G1
A_GACAGGCACACACTAT-1	0	KM4242_01	3	Primary	3 --> 3	Proneural_OPC_like_tumor	G3	Pri_Recurrence_after_TMZ	1p_19q_codeleted	CNA_Group_ 1	-1.0930090270515301E-3	-1.1583739031255201E-2	G1
A_GACATCCGTCGAACTG-1	0	KM4242_01	3	Primary	3 --> 3	Proneural_OPC_like_tumor	G3	Pri_Recurrence_after_TMZ	1p_19q_codeleted	CNA_Group_ 2	-3.1806551476846301E-2	-5.4927176514153603E-3	G1
A_GACATCGATTTATAAC-1	2	KM4242_01	3	Primary	3 --> 3	NPC_like_tumor	G3	Pri_Recurrence_after_TMZ	1p_19q_codeleted	NA	7.6989498782510907E-2	6.3633276742095304E-2	S
A_GACCACACTTCCCTTT-1	0	KM4242_01	3	Primary	3 --> 3	Proneural_OPC_like_tumor	G3	Pri_Recurrence_after_TMZ	1p_19q_codeleted	CNA_Group_ 1	-6.2019682577403598E-3	-6.4618169003862594E-2	G1
A_GACCAGAGCCCTGTAG-1	0	KM4242_01	3	Primary	3 --> 3	Proneural_OPC_like_tumor	G3	Pri_Recurrence_after_TMZ	1p_19q_codeleted	CNA_Group_ 2	3.2583425707543599E-2	-3.1743379718513397E-2	S
A_GACCGACTGAAGCGTC-1	0	KM4242_01	3	Primary	3 --> 3	Proneural_OPC_like_tumor	G3	Pri_Recurrence_after_TMZ	1p_19q_codeleted	CNA_Group_ 1	4.8669417226757397E-2	-3.7762716870324599E-2	S
A_GACCGTGCTGACGGTG-1	7	KM4242_01	3	Primary	3 --> 3	Cortical_neurons_and_tumor_cells	Cortical_neurons_and_tumor_cells	Pri_Recurrence_after_TMZ	1p_19q_codeleted	CNA_Group_ 1	1.46552166797908E-2	-2.0024355306985101E-2	S
A_GACCTTCCACGTCTAC-1	0	KM4242_01	3	Primary	3 --> 3	Proneural_OPC_like_tumor	G3	Pri_Recurrence_after_TMZ	1p_19q_codeleted	CNA_Group_ 2	4.7629380229941898E-2	2.5303092005680702E-2	S
A_GACGACGATCCGCGTT-1	0	KM4242_01	3	Primary	3 --> 3	Proneural_OPC_like_tumor	G3	Pri_Recurrence_after_TMZ	1p_19q_codeleted	CNA_Group_ 1	-1.0124918718161E-2	-3.4715386173035302E-2	G1
A_GACGCCGTAAAGGCTA-1	0	KM4242_01	3	Primary	3 --> 3	Proneural_OPC_like_tumor	G3	Pri_Recurrence_after_TMZ	1p_19q_codeleted	CNA_Group_ 1	2.4731761321525599E-2	-1.54862685634173E-2	S
A_GACGCTTGCTTCTAAA-1	0	KM4242_01	3	Primary	3 --> 3	Proneural_OPC_like_tumor	G3	Pri_Recurrence_after_TMZ	1p_19q_codeleted	CNA_Group_ 1	7.3245464710573402E-2	6.79139262328954E-3	S
A_GACGTGTAGGGATTAT-1	0	KM4242_01	3	Primary	3 --> 3	Proneural_OPC_like_tumor	G3	Pri_Recurrence_after_TMZ	1p_19q_codeleted	CNA_Group_ 1	5.0057251660765197E-2	-2.61200989711513E-2	S
A_GACTAAGATCATGCAC-1	0	KM4242_01	3	Primary	3 --> 3	Proneural_OPC_like_tumor	NA	Pri_Recurrence_after_TMZ	1p_19q_codeleted	CNA_Group_ 3	1.6924436823527001E-2	4.23938761984601E-2	G2M
A_GACTAAGTAGGCTCAC-1	2	KM4242_01	3	Primary	3 --> 3	NPC_like_tumor	G3	Pri_Recurrence_after_TMZ	non_tumor	NA	7.1681504779573496E-2	0.13801690075839701	G2M
A_GACTAGGCCGTTAGGT-1	0	KM4242_01	3	Primary	3 --> 3	Proneural_OPC_like_tumor	G3	Pri_Recurrence_after_TMZ	1p_19q_codeleted	CNA_Group_ 1	-5.3399545148777802E-2	-3.9700076400902097E-2	G1
A_GACTCGCGGGAATGAC-1	1	KM4242_01	3	Primary	3 --> 3	Oligodendrocyte_like_tumor	NA	Pri_Recurrence_after_TMZ	1p_19q_codeleted	CNA_Group_ 3	9.5468624405578208E-3	-4.37926777226968E-2	S
A_GACTGCAAATCGAGCT-1	0	KM4242_01	3	Primary	3 --> 3	Proneural_OPC_like_tumor	G3	Pri_Recurrence_after_TMZ	1p_19q_codeleted	CNA_Group_ 2	-1.2416513916427299E-2	-2.2435328167283702E-2	G1
A_GACTGCACCAGCCCAG-1	0	KM4242_01	3	Primary	3 --> 3	Proneural_OPC_like_tumor	NA	Pri_Recurrence_after_TMZ	1p_19q_codeleted	CNA_Group_ 1	3.3431488607256601E-2	5.5779049406424003E-2	G2M
A_GACTGCGGCACGTGTA-1	0	KM4242_01	3	Primary	3 --> 3	Proneural_OPC_like_tumor	G3	Pri_Recurrence_after_TMZ	1p_19q_codeleted	CNA_Group_ 1	5.1290479134836503E-2	6.3836624096609895E-2	G2M
A_GAGACTGATGGGTAGA-1	2	KM4242_01	3	Primary	3 --> 3	NPC_like_tumor	Neurons	Pri_Recurrence_after_TMZ	non_tumor	NA	-2.6835830734548101E-2	-1.07936292440455E-2	G1
A_GAGACTTCGCGACCGA-1	0	KM4242_01	3	Primary	3 --> 3	Proneural_OPC_like_tumor	G3	Pri_Recurrence_after_TMZ	1p_19q_codeleted	CNA_Group_ 1	0.11452098870418601	-1.8440383704265002E-2	S
A_GAGAGGGCGCGAGGTT-1	0	KM4242_01	3	Primary	3 --> 3	Proneural_OPC_like_tumor	G3	Pri_Recurrence_after_TMZ	1p_19q_codeleted	CNA_Group_ 1	5.52636764884172E-2	8.1394862472837698E-2	G2M
A_GAGAGGTGCATTCTGG-1	0	KM4242_01	3	Primary	3 --> 3	Proneural_OPC_like_tumor	G3	Pri_Recurrence_after_TMZ	1p_19q_codeleted	CNA_Group_ 1	4.5852149151294201E-2	-2.2209419720439601E-2	S
A_GAGATCTGCTTGGCAT-1	5	KM4242_01	3	Primary	3 --> 3	NPC_like_and_DNA_damage	G3	Pri_Recurrence_after_TMZ	1p_19q_codeleted	CNA_Group_ 1	5.5664533222270097E-3	-7.2425935753069898E-3	S
A_GAGATCTGTCACTCCG-1	1	KM4242_01	3	Primary	3 --> 3	Oligodendrocyte_like_tumor	NA	Pri_Recurrence_after_TMZ	1p_19q_codeleted	CNA_Group_ 3	-2.2200661753859201E-2	-2.75270422478292E-2	G1
A_GAGATCTTCCATGACA-1	0	KM4242_01	3	Primary	3 --> 3	Proneural_OPC_like_tumor	NA	Pri_Recurrence_after_TMZ	1p_19q_codeleted	CNA_Group_ 1	2.7895615724748701E-2	1.3359409909984001E-2	S
A_GAGATGGCTTTAATCA-1	0	KM4242_01	3	Primary	3 --> 3	Proneural_OPC_like_tumor	G3	Pri_Recurrence_after_TMZ	1p_19q_codeleted	CNA_Group_ 1	5.1882208546513001E-2	-6.0941556635629397E-2	S
A_GAGATGGGAGTCGACA-1	0	KM4242_01	3	Primary	3 --> 3	Proneural_OPC_like_tumor	G3	Pri_Recurrence_after_TMZ	1p_19q_codeleted	CNA_Group_ 2	7.4923003883780495E-2	-1.12040197973179E-2	S
A_GAGCACCTGTGTCCAG-1	6	KM4242_01	3	Primary	3 --> 3	IEG	G3	Pri_Recurrence_after_TMZ	1p_19q_codeleted	CNA_Group_ 1	5.1389297007259499E-2	-1.8160923832640698E-2	S
A_GAGCCAGCTACCTGTG-1	6	KM4242_01	3	Primary	3 --> 3	IEG	NA	Pri_Recurrence_after_TMZ	1p_19q_codeleted	CNA_Group_ 1	6.5702834574812005E-2	5.1052587584162097E-2	S
A_GAGCGAGGGAGTACCG-1	1	KM4242_01	3	Primary	3 --> 3	Oligodendrocyte_like_tumor	NA	Pri_Recurrence_after_TMZ	1p_19q_codeleted	CNA_Group_ 2	1.8351919541567199E-2	5.5418657085756799E-3	S
A_GAGCTAAGGGCATATC-1	1	KM4242_01	3	Primary	3 --> 3	Oligodendrocyte_like_tumor	NA	Pri_Recurrence_after_TMZ	1p_19q_codeleted	CNA_Group_ 2	-4.8814222120809297E-2	2.11005389535735E-2	G2M
A_GAGGAATGGAGAGGTT-1	0	KM4242_01	3	Primary	3 --> 3	Proneural_OPC_like_tumor	G3	Pri_Recurrence_after_TMZ	1p_19q_codeleted	CNA_Group_ 3	4.71627584668219E-2	1.7895057032885998E-2	S
A_GAGGCTATCAAAGTCG-1	5	KM4242_01	3	Primary	3 --> 3	NPC_like_and_DNA_damage	G3	Pri_Recurrence_after_TMZ	1p_19q_codeleted	CNA_Group_ 1	2.3468933590197E-2	-4.5072884347624402E-2	S
A_GAGGGCGCAGCTCTGC-1	1	KM4242_01	3	Primary	3 --> 3	Oligodendrocyte_like_tumor	NA	Pri_Recurrence_after_TMZ	1p_19q_codeleted	CNA_Group_ 4	-3.2671341221323001E-2	-4.3732954784613002E-3	G1
A_GAGGTACGCGTGTCCC-1	0	KM4242_01	3	Primary	3 --> 3	Proneural_OPC_like_tumor	G3	Pri_Recurrence_after_TMZ	1p_19q_codeleted	CNA_Group_ 1	7.2769661590917096E-3	-1.8143593120371799E-2	S
A_GAGTACGGGTATACAA-1	1	KM4242_01	3	Primary	3 --> 3	Oligodendrocyte_like_tumor	NA	Pri_Recurrence_after_TMZ	1p_19q_codeleted	CNA_Group_ 3	-9.1647336327808904E-4	-2.4019652410752199E-2	G1
A_GAGTAGATACTAGTTG-1	0	KM4242_01	3	Primary	3 --> 3	Proneural_OPC_like_tumor	G3	Pri_Recurrence_after_TMZ	1p_19q_codeleted	CNA_Group_ 2	3.7038285985153803E-2	-2.7030172518954902E-2	S
A_GAGTATGCCCGCCTTG-1	5	KM4242_01	3	Primary	3 --> 3	NPC_like_and_DNA_damage	G3	Pri_Recurrence_after_TMZ	1p_19q_codeleted	CNA_Group_ 1	3.6394248282530801E-2	3.2328329179051201E-3	S
A_GAGTATGCGCGTGCAT-1	0	KM4242_01	3	Primary	3 --> 3	Proneural_OPC_like_tumor	G3	Pri_Recurrence_after_TMZ	1p_19q_codeleted	CNA_Group_ 2	8.5595480514487093E-2	1.4349371456630001E-2	S
A_GAGTCAGACCAGAATC-1	0	KM4242_01	3	Primary	3 --> 3	Proneural_OPC_like_tumor	G3	Pri_Recurrence_after_TMZ	1p_19q_codeleted	CNA_Group_ 1	1.1881882576440799E-2	2.7383558453935699E-3	S
A_GAGTCCGCTTACCGGA-1	0	KM4242_01	3	Primary	3 --> 3	Proneural_OPC_like_tumor	G3	Pri_Recurrence_after_TMZ	1p_19q_codeleted	CNA_Group_ 2	5.9069245705251801E-3	2.5996694507544601E-2	G2M
A_GAGTGTCAACCAGAAA-1	6	KM4242_01	3	Primary	3 --> 3	IEG	G3	Pri_Recurrence_after_TMZ	1p_19q_codeleted	CNA_Group_ 1	8.5828495299213201E-2	-7.0099422826521707E-2	S
A_GATAAATCGGTGGATG-1	1	KM4242_01	3	Primary	3 --> 3	Oligodendrocyte_like_tumor	NA	Pri_Recurrence_after_TMZ	1p_19q_codeleted	CNA_Group_ 3	-2.9729533366617301E-2	-2.26608632986324E-2	G1
A_GATAACTCGCACTGTG-1	1	KM4242_01	3	Primary	3 --> 3	Oligodendrocyte_like_tumor	NA	Pri_Recurrence_after_TMZ	1p_19q_codeleted	CNA_Group_ 3	-1.15745797756668E-2	-2.9370135466598599E-2	G1
A_GATACGATGGGAGTCA-1	0	KM4242_01	3	Primary	3 --> 3	Proneural_OPC_like_tumor	G3	Pri_Recurrence_after_TMZ	1p_19q_codeleted	CNA_Group_ 1	-3.2500181574004798E-2	2.5227598537144701E-2	G2M
A_GATAGGTAACGTTGAC-1	0	KM4242_01	3	Primary	3 --> 3	Proneural_OPC_like_tumor	G3	Pri_Recurrence_after_TMZ	1p_19q_codeleted	CNA_Group_ 1	-1.81959428314372E-2	-8.3932857695043703E-2	G1
A_GATATGAGACACTAAC-1	1	KM4242_01	3	Primary	3 --> 3	Oligodendrocyte_like_tumor	NA	Pri_Recurrence_after_TMZ	1p_19q_codeleted	CNA_Group_ 3	3.0707318163168799E-2	2.87893865173641E-2	S
A_GATATGCGGTAGCCAA-1	1	KM4242_01	3	Primary	3 --> 3	Oligodendrocyte_like_tumor	NA	Pri_Recurrence_after_TMZ	1p_19q_codeleted	CNA_Group_ 2	4.5559586182506301E-2	1.06433792567555E-2	S
A_GATATGGATTACGCGG-1	3	KM4242_01	3	Primary	3 --> 3	RBCs	RBCs	Pri_Recurrence_after_TMZ	1p_19q_codeleted	CNA_Group_ 3	-4.8161240285036003E-2	1.3771002428824401E-2	G2M
A_GATCATTCCAAACATT-1	4	KM4242_01	3	Primary	3 --> 3	Pericyte_Endothelial	Pericyte_Endothelial	Pri_Recurrence_after_TMZ	1p_19q_codeleted	CNA_Group_ 1	-1.4102688276118099E-2	3.4369384063985903E-2	G2M
A_GATCCCTTTATACTGC-1	0	KM4242_01	3	Primary	3 --> 3	Proneural_OPC_like_tumor	NA	Pri_Recurrence_after_TMZ	1p_19q_codeleted	CNA_Group_ 1	2.0031880799567799E-2	-1.4055455183768099E-2	S
A_GATCCGGGAATTAACA-1	0	KM4242_01	3	Primary	3 --> 3	Proneural_OPC_like_tumor	NA	Pri_Recurrence_after_TMZ	1p_19q_codeleted	CNA_Group_ 1	3.0039200530474802E-2	-4.94606057640289E-2	S
A_GATCCTAAATCGGGAC-1	1	KM4242_01	3	Primary	3 --> 3	Oligodendrocyte_like_tumor	NA	Pri_Recurrence_after_TMZ	1p_19q_codeleted	CNA_Group_ 2	4.8213868090678298E-2	6.9422505506288703E-3	S
A_GATCGACACTATCTGA-1	0	KM4242_01	3	Primary	3 --> 3	Proneural_OPC_like_tumor	G3	Pri_Recurrence_after_TMZ	1p_19q_codeleted	CNA_Group_ 1	2.1303278713421199E-2	0.233935929135418	G2M
A_GATCGCGGGCTCTCCA-1	0	KM4242_01	3	Primary	3 --> 3	Proneural_OPC_like_tumor	G3	Pri_Recurrence_after_TMZ	1p_19q_codeleted	CNA_Group_ 2	1.5134244878226601E-2	2.6114657067507999E-2	G2M
A_GATCGGTGGCCATAAC-1	1	KM4242_01	3	Primary	3 --> 3	Oligodendrocyte_like_tumor	NA	Pri_Recurrence_after_TMZ	1p_19q_codeleted	CNA_Group_ 3	3.8297849483963801E-2	-4.9170023813084399E-2	S
A_GATCGTGACTGATATC-1	0	KM4242_01	3	Primary	3 --> 3	Proneural_OPC_like_tumor	NA	Pri_Recurrence_after_TMZ	1p_19q_codeleted	CNA_Group_ 1	5.33448623758336E-2	1.1751483012916199E-3	S
A_GATCTGCTATCTAAGG-1	0	KM4242_01	3	Primary	3 --> 3	Proneural_OPC_like_tumor	G3	Pri_Recurrence_after_TMZ	1p_19q_codeleted	CNA_Group_ 1	5.4463645801021601E-2	-3.3023245160384899E-3	S
A_GATCTTGGAGGGCATA-1	0	KM4242_01	3	Primary	3 --> 3	Proneural_OPC_like_tumor	G3	Pri_Recurrence_after_TMZ	1p_19q_codeleted	CNA_Group_ 1	5.8194920938350797E-2	-1.4869682271989801E-2	S
A_GATCTTTGCAGGGTAT-1	0	KM4242_01	3	Primary	3 --> 3	Proneural_OPC_like_tumor	G3	Pri_Recurrence_after_TMZ	1p_19q_codeleted	CNA_Group_ 1	5.5331272987746698E-2	-3.5176478721851603E-2	S
A_GATGAGGAACCTTCGG-1	0	KM4242_01	3	Primary	3 --> 3	Proneural_OPC_like_tumor	G3	Pri_Recurrence_after_TMZ	1p_19q_codeleted	CNA_Group_ 1	4.59610214074061E-2	0.144335769370499	G2M
A_GATGCGTCCTGCATTC-1	0	KM4242_01	3	Primary	3 --> 3	Proneural_OPC_like_tumor	G3	Pri_Recurrence_after_TMZ	1p_19q_codeleted	CNA_Group_ 1	5.8412767375489803E-2	-8.1315575529017402E-4	S
A_GATGCTACAAGCGCCT-1	0	KM4242_01	3	Primary	3 --> 3	Proneural_OPC_like_tumor	NA	Pri_Recurrence_after_TMZ	1p_19q_codeleted	CNA_Group_ 2	-4.0689814830959299E-2	2.8234140207786199E-2	G2M
A_GATGCTGTATTTCATC-1	4	KM4242_01	3	Primary	3 --> 3	Pericyte_Endothelial	Pericyte_Endothelial	Pri_Recurrence_after_TMZ	1p_19q_codeleted	CNA_Group_ 1	8.6400439595362893E-2	-2.54088573807187E-2	S
A_GATGGCGCACACATTA-1	0	KM4242_01	3	Primary	3 --> 3	Proneural_OPC_like_tumor	G3	Pri_Recurrence_after_TMZ	1p_19q_codeleted	CNA_Group_ 3	3.8818367870455103E-2	-1.8180825233554899E-2	S
A_GATGTTCAATCCACGA-1	0	KM4242_01	3	Primary	3 --> 3	Proneural_OPC_like_tumor	G3	Pri_Recurrence_after_TMZ	1p_19q_codeleted	CNA_Group_ 1	5.7411593317812697E-2	5.5960029143493101E-2	S
A_GATGTTTGTGCGAGAT-1	1	KM4242_01	3	Primary	3 --> 3	Oligodendrocyte_like_tumor	G3	Pri_Recurrence_after_TMZ	1p_19q_codeleted	CNA_Group_ 3	-0.101993611254012	-1.5627866237441002E-2	G1
A_GATTACTGAATTTGGG-1	0	KM4242_01	3	Primary	3 --> 3	Proneural_OPC_like_tumor	G3	Pri_Recurrence_after_TMZ	1p_19q_codeleted	CNA_Group_ 1	0.105549594721199	-6.68735386356102E-2	S
A_GATTCCCTTGTCGCAG-1	1	KM4242_01	3	Primary	3 --> 3	Oligodendrocyte_like_tumor	NA	Pri_Recurrence_after_TMZ	1p_19q_codeleted	CNA_Group_ 3	4.7276263492141701E-2	2.4060897880093701E-2	S
A_GATTCCGCGTTTCCGT-1	1	KM4242_01	3	Primary	3 --> 3	Oligodendrocyte_like_tumor	NA	Pri_Recurrence_after_TMZ	1p_19q_codeleted	CNA_Group_ 3	2.14106842699292E-2	1.29035468761251E-2	S
A_GATTCCTATACGGCGC-1	0	KM4242_01	3	Primary	3 --> 3	Proneural_OPC_like_tumor	G3	Pri_Recurrence_after_TMZ	1p_19q_codeleted	CNA_Group_ 1	-2.1154142801564E-2	-4.2525630714079103E-2	G1
A_GATTCGACGGTTCACG-1	0	KM4242_01	3	Primary	3 --> 3	Proneural_OPC_like_tumor	NA	Pri_Recurrence_after_TMZ	1p_19q_codeleted	CNA_Group_ 1	2.3705710542084799E-2	-3.1416276171823299E-2	S
A_GATTGGGAAAGGTTGT-1	0	KM4242_01	3	Primary	3 --> 3	Proneural_OPC_like_tumor	G3	Pri_Recurrence_after_TMZ	1p_19q_codeleted	CNA_Group_ 3	-3.3153217067905298E-2	-6.67321345748874E-2	G1
A_GCAAACCCTACATTAT-1	0	KM4242_01	3	Primary	3 --> 3	Proneural_OPC_like_tumor	NA	Pri_Recurrence_after_TMZ	1p_19q_codeleted	CNA_Group_ 1	0.11206047054733601	5.0346280053943003E-2	S
A_GCAAACCTTGGCCATA-1	0	KM4242_01	3	Primary	3 --> 3	Proneural_OPC_like_tumor	G3	Pri_Recurrence_after_TMZ	1p_19q_codeleted	CNA_Group_ 1	-3.01007117902353E-2	-6.4268673093247505E-2	G1
A_GCAAATATTACGCTTT-1	0	KM4242_01	3	Primary	3 --> 3	Proneural_OPC_like_tumor	G3	Pri_Recurrence_after_TMZ	1p_19q_codeleted	CNA_Group_ 1	4.1404018486547102E-2	-1.7108123633191901E-2	S
A_GCAACCACGGCCGCGT-1	0	KM4242_01	3	Primary	3 --> 3	Proneural_OPC_like_tumor	G3	Pri_Recurrence_after_TMZ	1p_19q_codeleted	CNA_Group_ 1	0.103065127305668	2.8923837969387502E-2	S
A_GCAAGAATTCCTTGGC-1	0	KM4242_01	3	Primary	3 --> 3	Proneural_OPC_like_tumor	G3	Pri_Recurrence_after_TMZ	1p_19q_codeleted	CNA_Group_ 1	6.9824307312325307E-2	-7.8332146590589805E-2	S
A_GCAAGTGCACAGAGAA-1	0	KM4242_01	3	Primary	3 --> 3	Proneural_OPC_like_tumor	G3	Pri_Recurrence_after_TMZ	1p_19q_codeleted	CNA_Group_ 1	7.8772157430182399E-2	-5.3363463113271399E-2	S
A_GCACACGCCCATGGTC-1	0	KM4242_01	3	Primary	3 --> 3	Proneural_OPC_like_tumor	G3	Pri_Recurrence_after_TMZ	1p_19q_codeleted	CNA_Group_ 1	-2.0500382527600901E-2	1.41211459762778E-2	G2M
A_GCACTGCCTACCTTTA-1	0	KM4242_01	3	Primary	3 --> 3	Proneural_OPC_like_tumor	G3	Pri_Recurrence_after_TMZ	1p_19q_codeleted	CNA_Group_ 1	9.9359531763433401E-2	-2.35946501563895E-2	S
A_GCAGATCCATAAGACT-1	0	KM4242_01	3	Primary	3 --> 3	Proneural_OPC_like_tumor	NA	Pri_Recurrence_after_TMZ	1p_19q_codeleted	CNA_Group_ 1	0.12589808118328299	-9.1579036017069692E-3	S
A_GCAGATTAGGGATATC-1	0	KM4242_01	3	Primary	3 --> 3	Proneural_OPC_like_tumor	G3	Pri_Recurrence_after_TMZ	1p_19q_codeleted	CNA_Group_ 1	0.13883122376305601	1.7821455870444099E-2	S
A_GCAGCACACAGCCCAG-1	0	KM4242_01	3	Primary	3 --> 3	Proneural_OPC_like_tumor	G3	Pri_Recurrence_after_TMZ	1p_19q_codeleted	CNA_Group_ 1	-1.26887013830198E-2	-1.47282111954034E-2	G1
A_GCAGCTGTCAACGCAT-1	0	KM4242_01	3	Primary	3 --> 3	Proneural_OPC_like_tumor	G3	Pri_Recurrence_after_TMZ	1p_19q_codeleted	CNA_Group_ 1	-5.6370049441532899E-2	-4.51454709853987E-2	G1
A_GCAGGACTATAGAATA-1	5	KM4242_01	3	Primary	3 --> 3	NPC_like_and_DNA_damage	G3	Pri_Recurrence_after_TMZ	1p_19q_codeleted	CNA_Group_ 1	-2.8604514322384499E-2	-6.4840634100993597E-2	G1
A_GCAGTGTGGCTATAGG-1	6	KM4242_01	3	Primary	3 --> 3	IEG	G3	Pri_Recurrence_after_TMZ	1p_19q_codeleted	CNA_Group_ 1	0.135648355400247	3.4622638398982497E-2	S
A_GCATACGAGGTCTTTA-1	0	KM4242_01	3	Primary	3 --> 3	Proneural_OPC_like_tumor	G3	Pri_Recurrence_after_TMZ	1p_19q_codeleted	CNA_Group_ 1	-2.0203958696522101E-2	0.12556080212784901	G2M
A_GCATAGAGCACTCAGG-1	0	KM4242_01	3	Primary	3 --> 3	Proneural_OPC_like_tumor	G3	Pri_Recurrence_after_TMZ	1p_19q_codeleted	CNA_Group_ 1	3.1676783311444801E-3	1.5613595217864899E-3	S
A_GCATCCCTAACTTTGA-1	0	KM4242_01	3	Primary	3 --> 3	Proneural_OPC_like_tumor	NA	Pri_Recurrence_after_TMZ	1p_19q_codeleted	CNA_Group_ 1	4.6603991533866202E-3	-3.2221123419563499E-2	S
A_GCATGAGGGACGCGGC-1	1	KM4242_01	3	Primary	3 --> 3	Oligodendrocyte_like_tumor	NA	Pri_Recurrence_after_TMZ	1p_19q_codeleted	CNA_Group_ 2	3.3763563911029401E-2	-2.5849055012339198E-2	S
A_GCATGCTAATAACGAT-1	0	KM4242_01	3	Primary	3 --> 3	Proneural_OPC_like_tumor	NA	Pri_Recurrence_after_TMZ	1p_19q_codeleted	CNA_Group_ 1	7.7251811105745402E-2	-1.40377994096252E-2	S
A_GCATTCGAAATGAACA-1	0	KM4242_01	3	Primary	3 --> 3	Proneural_OPC_like_tumor	G3	Pri_Recurrence_after_TMZ	1p_19q_codeleted	CNA_Group_ 2	-4.2356556574415401E-2	-2.4114067660489399E-2	G1
A_GCATTGTAATTCATAT-1	0	KM4242_01	3	Primary	3 --> 3	Proneural_OPC_like_tumor	G3	Pri_Recurrence_after_TMZ	1p_19q_codeleted	CNA_Group_ 1	-2.36599410502586E-2	-4.0396987265478596E-3	G1
A_GCCACAATTTAAGGAC-1	0	KM4242_01	3	Primary	3 --> 3	Proneural_OPC_like_tumor	G3	Pri_Recurrence_after_TMZ	1p_19q_codeleted	CNA_Group_ 1	7.8571606739900199E-2	6.7891909086059396E-2	S
A_GCCAGGAGTAACCGAT-1	1	KM4242_01	3	Primary	3 --> 3	Oligodendrocyte_like_tumor	NA	Pri_Recurrence_after_TMZ	1p_19q_codeleted	CNA_Group_ 3	-2.2897744664979E-2	-1.0491270144493201E-2	G1
A_GCCATATTGCACACAG-1	1	KM4242_01	3	Primary	3 --> 3	Oligodendrocyte_like_tumor	NA	Pri_Recurrence_after_TMZ	1p_19q_codeleted	CNA_Group_ 2	1.9186541159472499E-2	-5.9308646212980001E-2	S
A_GCCATCGAGCTGCGTG-1	5	KM4242_01	3	Primary	3 --> 3	NPC_like_and_DNA_damage	G3	Pri_Recurrence_after_TMZ	1p_19q_codeleted	CNA_Group_ 1	2.8935222920269399E-2	-3.4530517555667703E-2	S
A_GCCCAGTTGGTATGCC-1	0	KM4242_01	3	Primary	3 --> 3	Proneural_OPC_like_tumor	G3	Pri_Recurrence_after_TMZ	1p_19q_codeleted	CNA_Group_ 1	2.27335427211782E-3	7.9920878293312902E-2	G2M
A_GCCCGATCTGTGGTCG-1	0	KM4242_01	3	Primary	3 --> 3	Proneural_OPC_like_tumor	G3	Pri_Recurrence_after_TMZ	1p_19q_codeleted	CNA_Group_ 2	2.1087293586238499E-2	-2.8904070232114699E-2	S
A_GCCCGCGCGTAAACGG-1	0	KM4242_01	3	Primary	3 --> 3	Proneural_OPC_like_tumor	G3	Pri_Recurrence_after_TMZ	1p_19q_codeleted	CNA_Group_ 1	6.4899562030655597E-2	-7.6374210423816105E-2	S
A_GCCCGCGCGTTTGACA-1	0	KM4242_01	3	Primary	3 --> 3	Proneural_OPC_like_tumor	G3	Pri_Recurrence_after_TMZ	1p_19q_codeleted	CNA_Group_ 3	0.11074083144838601	-1.7665926386269699E-2	S
A_GCCCGTAATACCTTCT-1	1	KM4242_01	3	Primary	3 --> 3	Oligodendrocyte_like_tumor	NA	Pri_Recurrence_after_TMZ	1p_19q_codeleted	CNA_Group_ 2	-5.3493130375897799E-3	2.1119767186154999E-2	G2M
A_GCCCTGAGGATGGGCT-1	0	KM4242_01	3	Primary	3 --> 3	Proneural_OPC_like_tumor	G3	Pri_Recurrence_after_TMZ	1p_19q_codeleted	CNA_Group_ 1	8.6948858681339197E-2	-4.8920190338733398E-2	S
A_GCCGAAATTCCTACGT-1	0	KM4242_01	3	Primary	3 --> 3	Proneural_OPC_like_tumor	G3	Pri_Recurrence_after_TMZ	1p_19q_codeleted	CNA_Group_ 1	3.1897617597022497E-2	2.24460082716136E-2	S
A_GCCGATTGGCCAAGCT-1	0	KM4242_01	3	Primary	3 --> 3	Proneural_OPC_like_tumor	G3	Pri_Recurrence_after_TMZ	1p_19q_codeleted	CNA_Group_ 3	-1.5711073698184402E-2	-2.0536156280536601E-2	G1
A_GCCGCATTAGTCCGGC-1	5	KM4242_01	3	Primary	3 --> 3	NPC_like_and_DNA_damage	G3	Pri_Recurrence_after_TMZ	1p_19q_codeleted	CNA_Group_ 1	-5.59926292431418E-2	-8.6836795967925907E-3	G1
A_GCCGCTTGTGAGAAAC-1	0	KM4242_01	3	Primary	3 --> 3	Proneural_OPC_like_tumor	G3	Pri_Recurrence_after_TMZ	1p_19q_codeleted	CNA_Group_ 1	-5.2723756351621097E-2	-4.02008174784576E-2	G1
A_GCCGGGTTAGGGTCGC-1	0	KM4242_01	3	Primary	3 --> 3	Proneural_OPC_like_tumor	G3	Pri_Recurrence_after_TMZ	1p_19q_codeleted	CNA_Group_ 1	1.26523553054112E-2	1.1080314925917E-2	S
A_GCCTACGTTCTGTGCA-1	0	KM4242_01	3	Primary	3 --> 3	Proneural_OPC_like_tumor	G3	Pri_Recurrence_after_TMZ	1p_19q_codeleted	CNA_Group_ 1	0.102571048109732	3.5940201565220799E-2	S
A_GCCTAGCGATCTGACC-1	0	KM4242_01	3	Primary	3 --> 3	Proneural_OPC_like_tumor	G3	Pri_Recurrence_after_TMZ	1p_19q_codeleted	CNA_Group_ 1	5.0824863303612001E-2	-3.7577598816105201E-2	S
A_GCCTATAGTGTCAGGG-1	1	KM4242_01	3	Primary	3 --> 3	Oligodendrocyte_like_tumor	NA	Pri_Recurrence_after_TMZ	1p_19q_codeleted	CNA_Group_ 2	-3.4635685812356203E-2	-2.1347875339496499E-2	G1
A_GCCTATTCCGATATAG-1	1	KM4242_01	3	Primary	3 --> 3	Oligodendrocyte_like_tumor	G3	Pri_Recurrence_after_TMZ	1p_19q_codeleted	CNA_Group_ 3	-4.79544478199809E-2	-2.8047090176457599E-2	G1
A_GCCTCTATACATAGCA-1	0	KM4242_01	3	Primary	3 --> 3	Proneural_OPC_like_tumor	G3	Pri_Recurrence_after_TMZ	1p_19q_codeleted	CNA_Group_ 1	1.8409048405311702E-2	-4.0350066452906602E-3	S
A_GCCTTCAGCCCTACCG-1	1	KM4242_01	3	Primary	3 --> 3	Oligodendrocyte_like_tumor	NA	Pri_Recurrence_after_TMZ	1p_19q_codeleted	CNA_Group_ 2	2.8222084031394801E-2	3.74406918952341E-2	G2M
A_GCGAAACTTAACTGGA-1	0	KM4242_01	3	Primary	3 --> 3	Proneural_OPC_like_tumor	NA	Pri_Recurrence_after_TMZ	1p_19q_codeleted	CNA_Group_ 1	8.7704590760230693E-3	-4.1106132435041597E-2	S
A_GCGAAGAATCTGACGG-1	0	KM4242_01	3	Primary	3 --> 3	Proneural_OPC_like_tumor	G3	Pri_Recurrence_after_TMZ	1p_19q_codeleted	CNA_Group_ 1	0.115597131785676	-5.0400941772049103E-2	S
A_GCGAAGCCATACCCGT-1	0	KM4242_01	3	Primary	3 --> 3	Proneural_OPC_like_tumor	NA	Pri_Recurrence_after_TMZ	1p_19q_codeleted	CNA_Group_ 1	-2.2524531672443102E-2	8.4893514636091693E-3	G2M
A_GCGACGATAGTTGTAC-1	0	KM4242_01	3	Primary	3 --> 3	Proneural_OPC_like_tumor	G3	Pri_Recurrence_after_TMZ	1p_19q_codeleted	CNA_Group_ 4	-2.87071386011244E-2	5.0190225136526198E-2	G2M
A_GCGAGGCCCGAGCAGA-1	0	KM4242_01	3	Primary	3 --> 3	Proneural_OPC_like_tumor	G3	Pri_Recurrence_after_TMZ	1p_19q_codeleted	CNA_Group_ 1	7.3361023924822799E-2	-2.9081578446936698E-3	S
A_GCGAGTTCTGCAAAGA-1	0	KM4242_01	3	Primary	3 --> 3	Proneural_OPC_like_tumor	NA	Pri_Recurrence_after_TMZ	1p_19q_codeleted	CNA_Group_ 1	4.4770063297141904E-3	-5.6496965915996998E-3	S
A_GCGATTGTTAACGTTA-1	1	KM4242_01	3	Primary	3 --> 3	Oligodendrocyte_like_tumor	NA	Pri_Recurrence_after_TMZ	1p_19q_codeleted	CNA_Group_ 3	5.9316565449662503E-2	1.54884086589193E-2	S
A_GCGCATCCAGTCAGCA-1	1	KM4242_01	3	Primary	3 --> 3	Oligodendrocyte_like_tumor	NA	Pri_Recurrence_after_TMZ	1p_19q_codeleted	CNA_Group_ 2	4.58815463499865E-2	-2.05766762708872E-2	S
A_GCGCCGTTCCACGATA-1	0	KM4242_01	3	Primary	3 --> 3	Proneural_OPC_like_tumor	G3	Pri_Recurrence_after_TMZ	1p_19q_codeleted	CNA_Group_ 1	4.5028366323223497E-2	5.3721266328212898E-2	G2M
A_GCGCGTCATTGGTACA-1	6	KM4242_01	3	Primary	3 --> 3	IEG	G3	Pri_Recurrence_after_TMZ	1p_19q_codeleted	CNA_Group_ 1	0.13565495601781299	0.10577922575370199	S
A_GCGCTAATTGAATAGA-1	1	KM4242_01	3	Primary	3 --> 3	Oligodendrocyte_like_tumor	NA	Pri_Recurrence_after_TMZ	1p_19q_codeleted	CNA_Group_ 1	-6.16503125432874E-2	-2.9393773350251998E-3	G1
A_GCGCTATGCCGAGGCA-1	0	KM4242_01	3	Primary	3 --> 3	Proneural_OPC_like_tumor	G3	Pri_Recurrence_after_TMZ	1p_19q_codeleted	CNA_Group_ 1	-1.3738362962229401E-2	-7.5232784629956195E-2	G1
A_GCGCTGATCCAGACTC-1	0	KM4242_01	3	Primary	3 --> 3	Proneural_OPC_like_tumor	NA	Pri_Recurrence_after_TMZ	1p_19q_codeleted	CNA_Group_ 2	3.6262204066514397E-2	1.6994357065254199E-2	S
A_GCGCTGCTTTGCATTT-1	1	KM4242_01	3	Primary	3 --> 3	Oligodendrocyte_like_tumor	NA	Pri_Recurrence_after_TMZ	1p_19q_codeleted	CNA_Group_ 2	-4.8224192407806503E-2	4.7992965561698603E-2	G2M
A_GCGGACCGCGTTGTGG-1	0	KM4242_01	3	Primary	3 --> 3	Proneural_OPC_like_tumor	G3	Pri_Recurrence_after_TMZ	1p_19q_codeleted	CNA_Group_ 1	-6.2654203463340594E-2	-7.4989267055100006E-2	G1
A_GCGGAGAGGGAGAACG-1	0	KM4242_01	3	Primary	3 --> 3	Proneural_OPC_like_tumor	NA	Pri_Recurrence_after_TMZ	1p_19q_codeleted	CNA_Group_ 1	-8.6684170501546108E-3	-7.0852061338487704E-2	G1
A_GCGGCTCTGACGTACC-1	2	KM4242_01	3	Primary	3 --> 3	NPC_like_tumor	G3	Pri_Recurrence_after_TMZ	non_tumor	NA	5.9876090999039601E-2	2.60845026079508E-2	S
A_GCGGGAACCAGGCCCT-1	1	KM4242_01	3	Primary	3 --> 3	Oligodendrocyte_like_tumor	NA	Pri_Recurrence_after_TMZ	1p_19q_codeleted	CNA_Group_ 1	-6.0346550181760703E-2	3.3943450110917898E-3	G2M
A_GCGGGCGAGCCTTACC-1	0	KM4242_01	3	Primary	3 --> 3	Proneural_OPC_like_tumor	G3	Pri_Recurrence_after_TMZ	1p_19q_codeleted	CNA_Group_ 1	2.7697465540654002E-2	7.6604964659166396E-3	S
A_GCGGTCTTGCTTTCAC-1	0	KM4242_01	3	Primary	3 --> 3	Proneural_OPC_like_tumor	G3	Pri_Recurrence_after_TMZ	1p_19q_codeleted	CNA_Group_ 1	0.203110263410929	-2.3101413691502802E-3	S
A_GCGGTTCCCTATCATG-1	0	KM4242_01	3	Primary	3 --> 3	Proneural_OPC_like_tumor	G3	Pri_Recurrence_after_TMZ	1p_19q_codeleted	CNA_Group_ 1	0.146555984248261	1.31863006044714E-2	S
A_GCGTCGAAATGTCGGT-1	1	KM4242_01	3	Primary	3 --> 3	Oligodendrocyte_like_tumor	NA	Pri_Recurrence_after_TMZ	1p_19q_codeleted	CNA_Group_ 2	6.9059095987893601E-2	-4.1850566938191502E-2	S
A_GCGTCGCCAGGGTGAT-1	0	KM4242_01	3	Primary	3 --> 3	Proneural_OPC_like_tumor	G3	Pri_Recurrence_after_TMZ	1p_19q_codeleted	CNA_Group_ 2	3.4352917486302398E-2	1.8687765121443999E-2	S
A_GCGTCTCTGCATTGGG-1	0	KM4242_01	3	Primary	3 --> 3	Proneural_OPC_like_tumor	G3	Pri_Recurrence_after_TMZ	1p_19q_codeleted	CNA_Group_ 3	-1.3138857966658399E-2	-3.9986822856316898E-2	G1
A_GCGTTATATTTGGAAC-1	3	KM4242_01	3	Primary	3 --> 3	RBCs	RBCs	Pri_Recurrence_after_TMZ	1p_19q_codeleted	CNA_Group_ 2	3.4803523605842497E-2	1.30297707215085E-2	S
A_GCTAAACCTGAGGTGA-1	2	KM4242_01	3	Primary	3 --> 3	NPC_like_tumor	G3	Pri_Recurrence_after_TMZ	non_tumor	NA	-6.8387006166774303E-2	-4.8398166485197597E-2	G1
A_GCTAACTGAAGTCTGA-1	0	KM4242_01	3	Primary	3 --> 3	Proneural_OPC_like_tumor	G3	Pri_Recurrence_after_TMZ	1p_19q_codeleted	CNA_Group_ 1	5.8518797012662903E-2	-4.1575951827451003E-3	S
A_GCTAAGTAGTTTCTCT-1	1	KM4242_01	3	Primary	3 --> 3	Oligodendrocyte_like_tumor	NA	Pri_Recurrence_after_TMZ	1p_19q_codeleted	CNA_Group_ 3	1.33020277865814E-2	-2.77481097952831E-2	S
A_GCTAATACCGAATGCC-1	0	KM4242_01	3	Primary	3 --> 3	Proneural_OPC_like_tumor	NA	Pri_Recurrence_after_TMZ	1p_19q_codeleted	CNA_Group_ 1	5.6485772688402401E-2	4.0400748070001198E-3	S
A_GCTACGACTTATTGGG-1	0	KM4242_01	3	Primary	3 --> 3	Proneural_OPC_like_tumor	G3	Pri_Recurrence_after_TMZ	1p_19q_codeleted	CNA_Group_ 1	1.5902221331822501E-2	1.3424648204446699E-3	S
A_GCTAGCTTGAATAGCT-1	0	KM4242_01	3	Primary	3 --> 3	Proneural_OPC_like_tumor	G3	Pri_Recurrence_after_TMZ	1p_19q_codeleted	CNA_Group_ 1	1.4651243311142099E-2	4.4388421615448896E-3	S
A_GCTAGGCACCACGGAG-1	6	KM4242_01	3	Primary	3 --> 3	IEG	G3	Pri_Recurrence_after_TMZ	1p_19q_codeleted	CNA_Group_ 1	5.3998885709986297E-3	-1.08257546520338E-2	S
A_GCTAGTAGAGCTTGTA-1	0	KM4242_01	3	Primary	3 --> 3	Proneural_OPC_like_tumor	G3	Pri_Recurrence_after_TMZ	1p_19q_codeleted	CNA_Group_ 1	6.0301059695399603E-2	-4.9757890421224103E-2	S
A_GCTAGTTTCATTGAGG-1	4	KM4242_01	3	Primary	3 --> 3	Pericyte_Endothelial	Pericyte_Endothelial	Pri_Recurrence_after_TMZ	1p_19q_codeleted	CNA_Group_ 1	8.1452694835466594E-3	1.9136469745294701E-2	G2M
A_GCTATCATACTCATGG-1	6	KM4242_01	3	Primary	3 --> 3	IEG	G3	Pri_Recurrence_after_TMZ	1p_19q_codeleted	CNA_Group_ 1	9.5369349802204406E-2	3.7961768423282499E-2	S
A_GCTATCGCGGCGCAAC-1	0	KM4242_01	3	Primary	3 --> 3	Proneural_OPC_like_tumor	G3	Pri_Recurrence_after_TMZ	1p_19q_codeleted	CNA_Group_ 3	5.55763737728312E-2	7.9586538844981809E-3	S
A_GCTCAATGTAATACCG-1	0	KM4242_01	3	Primary	3 --> 3	Proneural_OPC_like_tumor	G3	Pri_Recurrence_after_TMZ	1p_19q_codeleted	CNA_Group_ 1	4.3993289784223101E-2	-7.2166260978772795E-2	S
A_GCTCGGAATTTAAAGC-1	1	KM4242_01	3	Primary	3 --> 3	Oligodendrocyte_like_tumor	NA	Pri_Recurrence_after_TMZ	1p_19q_codeleted	CNA_Group_ 3	-2.18763783956069E-2	-3.4100326228978399E-2	G1
A_GCTCTAAACCCTGACG-1	1	KM4242_01	3	Primary	3 --> 3	Oligodendrocyte_like_tumor	NA	Pri_Recurrence_after_TMZ	1p_19q_codeleted	CNA_Group_ 3	-4.8888473834580302E-2	-8.0816726803652997E-2	G1
A_GCTCTATGTTACGTGC-1	0	KM4242_01	3	Primary	3 --> 3	Proneural_OPC_like_tumor	G3	Pri_Recurrence_after_TMZ	1p_19q_codeleted	CNA_Group_ 1	5.0719515959897099E-2	-1.69446069203236E-2	S
A_GCTCTCGGGTACCGAA-1	2	KM4242_01	3	Primary	3 --> 3	NPC_like_tumor	Neurons	Pri_Recurrence_after_TMZ	non_tumor	NA	5.0629921313074401E-2	-5.1986530622385903E-3	S
A_GCTGAGGCGTGAGTAT-1	0	KM4242_01	3	Primary	3 --> 3	Proneural_OPC_like_tumor	G3	Pri_Recurrence_after_TMZ	1p_19q_codeleted	CNA_Group_ 1	5.1207849139046198E-2	3.8222541806570698E-4	S
A_GCTGCACGGTTTCTTA-1	0	KM4242_01	3	Primary	3 --> 3	Proneural_OPC_like_tumor	NA	Pri_Recurrence_after_TMZ	1p_19q_codeleted	CNA_Group_ 1	3.9536139716310002E-2	-3.1481514245775097E-2	S
A_GCTGCTAAGTAGTCGA-1	0	KM4242_01	3	Primary	3 --> 3	Proneural_OPC_like_tumor	G3	Pri_Recurrence_after_TMZ	1p_19q_codeleted	CNA_Group_ 2	-2.5399396500712001E-2	-3.1663525428119003E-2	G1
A_GCTGCTACTGCGTAGC-1	2	KM4242_01	3	Primary	3 --> 3	NPC_like_tumor	G3	Pri_Recurrence_after_TMZ	non_tumor	NA	-2.0671375259457999E-2	-4.3918461125927302E-2	G1
A_GCTGCTCTCCGGACAC-1	1	KM4242_01	3	Primary	3 --> 3	Oligodendrocyte_like_tumor	NA	Pri_Recurrence_after_TMZ	1p_19q_codeleted	CNA_Group_ 3	-3.1777011006568101E-2	6.8507282888385403E-3	G2M
A_GCTGGCATATTCACCT-1	0	KM4242_01	3	Primary	3 --> 3	Proneural_OPC_like_tumor	G3	Pri_Recurrence_after_TMZ	1p_19q_codeleted	CNA_Group_ 1	6.4663143921560806E-2	-5.7075923125221903E-2	S
A_GCTGGCGGCGCATGCT-1	0	KM4242_01	3	Primary	3 --> 3	Proneural_OPC_like_tumor	G3	Pri_Recurrence_after_TMZ	1p_19q_codeleted	CNA_Group_ 2	3.5948478145078198E-2	-3.4418288512993903E-2	S
A_GCTGTATTACTGGCCC-1	0	KM4242_01	3	Primary	3 --> 3	Proneural_OPC_like_tumor	G3	Pri_Recurrence_after_TMZ	1p_19q_codeleted	CNA_Group_ 1	6.1197023726404898E-2	-4.15426610058134E-2	S
A_GCTTAATGTAACTAAC-1	1	KM4242_01	3	Primary	3 --> 3	Oligodendrocyte_like_tumor	NA	Pri_Recurrence_after_TMZ	1p_19q_codeleted	CNA_Group_ 3	1.13902460106447E-2	2.1076083224153198E-2	G2M
A_GCTTATGAAGCAGGAA-1	1	KM4242_01	3	Primary	3 --> 3	Oligodendrocyte_like_tumor	NA	Pri_Recurrence_after_TMZ	1p_19q_codeleted	CNA_Group_ 3	-2.2335573211727501E-2	3.2191837856351602E-2	G2M
A_GCTTCCGTCCCTAGAC-1	1	KM4242_01	3	Primary	3 --> 3	Oligodendrocyte_like_tumor	NA	Pri_Recurrence_after_TMZ	1p_19q_codeleted	CNA_Group_ 2	3.5987557480146697E-2	9.60854000213215E-4	S
A_GCTTGATGATAATCAG-1	0	KM4242_01	3	Primary	3 --> 3	Proneural_OPC_like_tumor	G3	Pri_Recurrence_after_TMZ	1p_19q_codeleted	CNA_Group_ 1	-2.8953734993538399E-2	6.6706360691878904E-3	G2M
A_GGAAAGTGCCCATGCC-1	1	KM4242_01	3	Primary	3 --> 3	Oligodendrocyte_like_tumor	NA	Pri_Recurrence_after_TMZ	1p_19q_codeleted	CNA_Group_ 3	-3.4902809494765201E-2	2.4668217203489998E-2	G2M
A_GGAAGGACACCGTATA-1	0	KM4242_01	3	Primary	3 --> 3	Proneural_OPC_like_tumor	G3	Pri_Recurrence_after_TMZ	1p_19q_codeleted	CNA_Group_ 1	4.4120678338132699E-2	-7.3273089120574994E-2	S
A_GGAATGCGCTAGCGTG-1	1	KM4242_01	3	Primary	3 --> 3	Oligodendrocyte_like_tumor	NA	Pri_Recurrence_after_TMZ	1p_19q_codeleted	CNA_Group_ 1	1.5854876730554999E-2	-2.0067282691523702E-2	S
A_GGACCAACAGGATAAC-1	0	KM4242_01	3	Primary	3 --> 3	Proneural_OPC_like_tumor	G3	Pri_Recurrence_after_TMZ	1p_19q_codeleted	CNA_Group_ 2	7.4366763066093203E-2	-3.97023069996165E-2	S
A_GGACTCTTTGACTAAG-1	0	KM4242_01	3	Primary	3 --> 3	Proneural_OPC_like_tumor	G3	Pri_Recurrence_after_TMZ	1p_19q_codeleted	CNA_Group_ 1	-4.3865565334124702E-3	-4.4042095870635699E-2	G1
A_GGAGAAGTCATTGGCA-1	0	KM4242_01	3	Primary	3 --> 3	Proneural_OPC_like_tumor	G3	Pri_Recurrence_after_TMZ	1p_19q_codeleted	CNA_Group_ 3	-3.3175294421203899E-2	-3.2297182144559497E-2	G1
A_GGAGACGACACCTTTG-1	0	KM4242_01	3	Primary	3 --> 3	Proneural_OPC_like_tumor	G3	Pri_Recurrence_after_TMZ	1p_19q_codeleted	CNA_Group_ 1	4.1613231413623903E-3	5.47155998164828E-3	G2M
A_GGAGCACCAAGAACTA-1	1	KM4242_01	3	Primary	3 --> 3	Oligodendrocyte_like_tumor	NA	Pri_Recurrence_after_TMZ	1p_19q_codeleted	CNA_Group_ 3	-1.29584467285646E-3	4.0725388332211801E-2	G2M
A_GGAGCGAGGCCTACTT-1	6	KM4242_01	3	Primary	3 --> 3	IEG	G3	Pri_Recurrence_after_TMZ	1p_19q_codeleted	CNA_Group_ 1	6.8418405036771504E-2	0.102855767126692	G2M
A_GGAGGGCTTGGTTGGC-1	1	KM4242_01	3	Primary	3 --> 3	Oligodendrocyte_like_tumor	NA	Pri_Recurrence_after_TMZ	1p_19q_codeleted	CNA_Group_ 3	8.1157115251215307E-3	1.5853267489194401E-2	G2M
A_GGAGTGCCGCCCTGGA-1	1	KM4242_01	3	Primary	3 --> 3	Oligodendrocyte_like_tumor	NA	Pri_Recurrence_after_TMZ	1p_19q_codeleted	CNA_Group_ 3	6.1890043655417198E-2	3.2897388889271198E-2	S
A_GGATCCGGAATATACT-1	1	KM4242_01	3	Primary	3 --> 3	Oligodendrocyte_like_tumor	NA	Pri_Recurrence_after_TMZ	1p_19q_codeleted	CNA_Group_ 2	-2.5439264030577701E-3	1.28967246691311E-2	G2M
A_GGATGACGCGAGTTTA-1	0	KM4242_01	3	Primary	3 --> 3	Proneural_OPC_like_tumor	G3	Pri_Recurrence_after_TMZ	1p_19q_codeleted	CNA_Group_ 1	4.5027690185493602E-2	2.43211698536125E-2	S
A_GGATGCTGGCGTTCCT-1	0	KM4242_01	3	Primary	3 --> 3	Proneural_OPC_like_tumor	G3	Pri_Recurrence_after_TMZ	1p_19q_codeleted	CNA_Group_ 1	5.8495558131012898E-2	2.63338069681258E-2	S
A_GGATGTCCTTACCGCA-1	7	KM4242_01	3	Primary	3 --> 3	Cortical_neurons_and_tumor_cells	Cortical_neurons_and_tumor_cells	Pri_Recurrence_after_TMZ	non_tumor	CNA_Group_ 2	2.33597861502082E-2	2.5486414044129501E-3	S
A_GGATTAATCATGGACC-1	0	KM4242_01	3	Primary	3 --> 3	Proneural_OPC_like_tumor	G3	Pri_Recurrence_after_TMZ	1p_19q_codeleted	CNA_Group_ 1	7.2414775651022901E-3	-3.3187377639401598E-2	S
A_GGATTCAGTACGGTGG-1	2	KM4242_01	3	Primary	3 --> 3	NPC_like_tumor	G3	Pri_Recurrence_after_TMZ	non_tumor	NA	-3.1855056486525597E-2	-9.6706167158901596E-3	G1
A_GGATTCCGCTATACCC-1	4	KM4242_01	3	Primary	3 --> 3	Pericyte_Endothelial	Pericyte_Endothelial	Pri_Recurrence_after_TMZ	1p_19q_codeleted	CNA_Group_ 2	3.2965931838647598E-3	-3.4068489209544903E-2	S
A_GGATTGCTGTGACTCC-1	0	KM4242_01	3	Primary	3 --> 3	Proneural_OPC_like_tumor	G3	Pri_Recurrence_after_TMZ	1p_19q_codeleted	CNA_Group_ 1	6.17949176108522E-2	-6.90345798012863E-2	S
A_GGATTTCACTTCTATA-1	1	KM4242_01	3	Primary	3 --> 3	Oligodendrocyte_like_tumor	NA	Pri_Recurrence_after_TMZ	1p_19q_codeleted	CNA_Group_ 3	2.5724975391700398E-2	8.5842654566018403E-2	G2M
A_GGCAAATTACTTTACT-1	0	KM4242_01	3	Primary	3 --> 3	Proneural_OPC_like_tumor	G3	Pri_Recurrence_after_TMZ	1p_19q_codeleted	CNA_Group_ 1	2.7115825515836401E-2	-4.7501732837521996E-3	S
A_GGCAAGCCCATAGTGG-1	6	KM4242_01	3	Primary	3 --> 3	IEG	G3	Pri_Recurrence_after_TMZ	1p_19q_codeleted	CNA_Group_ 1	6.4259863748330898E-2	-3.6654374815133797E-2	S
A_GGCAAGGCGAAATAGC-1	0	KM4242_01	3	Primary	3 --> 3	Proneural_OPC_like_tumor	G3	Pri_Recurrence_after_TMZ	1p_19q_codeleted	CNA_Group_ 1	4.0907944096352797E-3	-6.4267729652011094E-2	S
A_GGCAATAGTCAATGAG-1	1	KM4242_01	3	Primary	3 --> 3	Oligodendrocyte_like_tumor	NA	Pri_Recurrence_after_TMZ	1p_19q_codeleted	CNA_Group_ 3	2.0261837137600198E-3	-3.6324677126808899E-3	S
A_GGCACTCCACTGGGCA-1	0	KM4242_01	3	Primary	3 --> 3	Proneural_OPC_like_tumor	G3	Pri_Recurrence_after_TMZ	1p_19q_codeleted	CNA_Group_ 1	5.1349799652605404E-3	-3.241332378437E-2	S
A_GGCATACAGGTAGCGG-1	0	KM4242_01	3	Primary	3 --> 3	Proneural_OPC_like_tumor	G3	Pri_Recurrence_after_TMZ	1p_19q_codeleted	CNA_Group_ 1	1.6185790459105901E-2	-2.1510902700743399E-2	S
A_GGCATATCGGTTCTGC-1	1	KM4242_01	3	Primary	3 --> 3	Oligodendrocyte_like_tumor	NA	Pri_Recurrence_after_TMZ	1p_19q_codeleted	CNA_Group_ 2	1.48569113699878E-2	-3.4157570244447602E-3	S
A_GGCCCAGCTGGTTTGC-1	0	KM4242_01	3	Primary	3 --> 3	Proneural_OPC_like_tumor	G3	Pri_Recurrence_after_TMZ	1p_19q_codeleted	CNA_Group_ 1	1.40245449080018E-2	3.4922515276225602E-4	S
A_GGCCCTCACCCACTTA-1	0	KM4242_01	3	Primary	3 --> 3	Proneural_OPC_like_tumor	G3	Pri_Recurrence_after_TMZ	1p_19q_codeleted	CNA_Group_ 1	-2.8486998430732602E-3	-0.109906988246791	G1
A_GGCCGGCGTCTGCTAT-1	0	KM4242_01	3	Primary	3 --> 3	Proneural_OPC_like_tumor	G3	Pri_Recurrence_after_TMZ	1p_19q_codeleted	CNA_Group_ 1	4.0664936165103097E-2	5.09764314116593E-2	G2M
A_GGCGCAGGACATCTTC-1	5	KM4242_01	3	Primary	3 --> 3	NPC_like_and_DNA_damage	G3	Pri_Recurrence_after_TMZ	1p_19q_codeleted	CNA_Group_ 1	1.6457552174573401E-2	2.11455993216772E-2	G2M
A_GGCGCATGAATTGATG-1	0	KM4242_01	3	Primary	3 --> 3	Proneural_OPC_like_tumor	G3	Pri_Recurrence_after_TMZ	1p_19q_codeleted	CNA_Group_ 1	9.5032631335553494E-2	-1.7677052735488901E-2	S
A_GGCGCGGAGATCTTTC-1	6	KM4242_01	3	Primary	3 --> 3	IEG	G3	Pri_Recurrence_after_TMZ	1p_19q_codeleted	CNA_Group_ 1	7.5526270928148106E-2	-3.1318869881471201E-3	S
A_GGCGCGTTCGAGTTTA-1	0	KM4242_01	3	Primary	3 --> 3	Proneural_OPC_like_tumor	G3	Pri_Recurrence_after_TMZ	1p_19q_codeleted	CNA_Group_ 2	3.4658449978657501E-3	3.9313083392977399E-2	G2M
A_GGCGCTTCATTCCCTG-1	6	KM4242_01	3	Primary	3 --> 3	IEG	G3	Pri_Recurrence_after_TMZ	1p_19q_codeleted	CNA_Group_ 1	-8.66292871511384E-3	-4.4046987031730503E-2	G1
A_GGCGGAGTAATATTAG-1	0	KM4242_01	3	Primary	3 --> 3	Proneural_OPC_like_tumor	G3	Pri_Recurrence_after_TMZ	1p_19q_codeleted	CNA_Group_ 2	5.8603943159083998E-3	-6.2637210941637197E-2	S
A_GGCGGTAGGATCATTG-1	1	KM4242_01	3	Primary	3 --> 3	Oligodendrocyte_like_tumor	NA	Pri_Recurrence_after_TMZ	1p_19q_codeleted	CNA_Group_ 3	-2.75075505816413E-2	3.0315202963301601E-2	G2M
A_GGCGTAGGGAAAGCTG-1	0	KM4242_01	3	Primary	3 --> 3	Proneural_OPC_like_tumor	G3	Pri_Recurrence_after_TMZ	1p_19q_codeleted	CNA_Group_ 1	6.2729794698514604E-3	2.5001344053840201E-2	G2M
A_GGCGTCCTATCCGCTG-1	0	KM4242_01	3	Primary	3 --> 3	Proneural_OPC_like_tumor	G3	Pri_Recurrence_after_TMZ	1p_19q_codeleted	CNA_Group_ 1	7.8738697249382594E-2	-1.9317975872697499E-2	S
A_GGCTATTAAGTTGTAT-1	0	KM4242_01	3	Primary	3 --> 3	Proneural_OPC_like_tumor	G3	Pri_Recurrence_after_TMZ	1p_19q_codeleted	CNA_Group_ 1	-4.9638257628815699E-2	-2.3118949788680902E-2	G1
A_GGCTCGCGTTGAGGTA-1	1	KM4242_01	3	Primary	3 --> 3	Oligodendrocyte_like_tumor	NA	Pri_Recurrence_after_TMZ	1p_19q_codeleted	CNA_Group_ 3	3.05868175812571E-2	-2.07550993131096E-2	S
A_GGCTCGTGCCACCAGC-1	0	KM4242_01	3	Primary	3 --> 3	Proneural_OPC_like_tumor	G3	Pri_Recurrence_after_TMZ	1p_19q_codeleted	CNA_Group_ 1	4.0557685226012899E-2	0.123997842885605	G2M
A_GGCTCTGCTCCAACGC-1	1	KM4242_01	3	Primary	3 --> 3	Oligodendrocyte_like_tumor	NA	Pri_Recurrence_after_TMZ	1p_19q_codeleted	CNA_Group_ 3	4.0078544708991401E-2	1.0848499744401099E-3	S
A_GGCTGAAATAGCAAAG-1	0	KM4242_01	3	Primary	3 --> 3	Proneural_OPC_like_tumor	NA	Pri_Recurrence_after_TMZ	1p_19q_codeleted	CNA_Group_ 1	6.6965524050349098E-2	-1.55248812267261E-3	S
A_GGCTTTCAATAAGGGT-1	0	KM4242_01	3	Primary	3 --> 3	Proneural_OPC_like_tumor	G3	Pri_Recurrence_after_TMZ	NA	NA	1.7144072417913901E-2	-1.5239798861757499E-2	S
A_GGGAACGGGAGGTTAG-1	5	KM4242_01	3	Primary	3 --> 3	NPC_like_and_DNA_damage	G3	Pri_Recurrence_after_TMZ	1p_19q_codeleted	CNA_Group_ 1	1.40668741124917E-2	8.1186397456765605E-2	G2M
A_GGGAAGACGGTCTGTC-1	0	KM4242_01	3	Primary	3 --> 3	Proneural_OPC_like_tumor	G3	Pri_Recurrence_after_TMZ	1p_19q_codeleted	CNA_Group_ 2	2.5784696300006599E-2	-1.9178944798944001E-2	S
A_GGGAAGGGCTTTCTCA-1	5	KM4242_01	3	Primary	3 --> 3	NPC_like_and_DNA_damage	G3	Pri_Recurrence_after_TMZ	1p_19q_codeleted	CNA_Group_ 1	3.5898696995131298E-2	-4.21518699887438E-3	S
A_GGGACCCGTATATCTT-1	0	KM4242_01	3	Primary	3 --> 3	Proneural_OPC_like_tumor	G3	Pri_Recurrence_after_TMZ	1p_19q_codeleted	CNA_Group_ 1	-7.3201590029291202E-3	-6.6788810270390506E-2	G1
A_GGGACTGCATAGATAG-1	0	KM4242_01	3	Primary	3 --> 3	Proneural_OPC_like_tumor	NA	Pri_Recurrence_after_TMZ	1p_19q_codeleted	CNA_Group_ 1	-1.29514919621095E-2	7.7017524852550203E-3	G2M
A_GGGAGAACTCACAGTA-1	0	KM4242_01	3	Primary	3 --> 3	Proneural_OPC_like_tumor	NA	Pri_Recurrence_after_TMZ	1p_19q_codeleted	CNA_Group_ 1	7.4413521176545901E-3	-2.5646086369077E-2	S
A_GGGAGCGACCGTAGTG-1	0	KM4242_01	3	Primary	3 --> 3	Proneural_OPC_like_tumor	G3	Pri_Recurrence_after_TMZ	1p_19q_codeleted	CNA_Group_ 1	3.2115822876954497E-2	8.7101935127264496E-2	G2M
A_GGGAGGATGCCCGAAA-1	0	KM4242_01	3	Primary	3 --> 3	Proneural_OPC_like_tumor	G3	Pri_Recurrence_after_TMZ	1p_19q_codeleted	CNA_Group_ 1	3.9594263313486996E-3	-1.8180897716767501E-2	S
A_GGGAGTTAATGAGGCG-1	1	KM4242_01	3	Primary	3 --> 3	Oligodendrocyte_like_tumor	NA	Pri_Recurrence_after_TMZ	1p_19q_codeleted	CNA_Group_ 3	6.3308692366350505E-2	7.6634139355961899E-3	S
A_GGGATGGTCGTAACCG-1	2	KM4242_01	3	Primary	3 --> 3	NPC_like_tumor	G3	Pri_Recurrence_after_TMZ	1p_19q_codeleted	NA	-6.2045662836725203E-4	-2.5886865000905101E-2	G1
A_GGGATTTACCGCACCT-1	1	KM4242_01	3	Primary	3 --> 3	Oligodendrocyte_like_tumor	NA	Pri_Recurrence_after_TMZ	1p_19q_codeleted	CNA_Group_ 3	5.6747343668192597E-2	9.8518891919052599E-3	S
A_GGGCAGAGCAATCGTT-1	0	KM4242_01	3	Primary	3 --> 3	Proneural_OPC_like_tumor	G3	Pri_Recurrence_after_TMZ	1p_19q_codeleted	CNA_Group_ 2	4.4567287022127099E-3	2.9865315957945501E-2	G2M
A_GGGCAGTCAACGCCAA-1	0	KM4242_01	3	Primary	3 --> 3	Proneural_OPC_like_tumor	G3	Pri_Recurrence_after_TMZ	1p_19q_codeleted	CNA_Group_ 1	-1.9133518569118799E-2	-1.7750362190803601E-2	G1
A_GGGCCCGTCTTAAACA-1	0	KM4242_01	3	Primary	3 --> 3	Proneural_OPC_like_tumor	G3	Pri_Recurrence_after_TMZ	1p_19q_codeleted	CNA_Group_ 2	-4.0618597650045697E-2	-2.2203740820553399E-2	G1
A_GGGCCCTACGAAAGGG-1	0	KM4242_01	3	Primary	3 --> 3	Proneural_OPC_like_tumor	G3	Pri_Recurrence_after_TMZ	1p_19q_codeleted	CNA_Group_ 1	2.1506265301780801E-4	8.8773333645551199E-3	G2M
A_GGGCCGGCCGAAGTAC-1	1	KM4242_01	3	Primary	3 --> 3	Oligodendrocyte_like_tumor	NA	Pri_Recurrence_after_TMZ	1p_19q_codeleted	CNA_Group_ 3	5.1784964475299601E-2	-4.1785342778529001E-2	S
A_GGGCGATATGTGTGAA-1	1	KM4242_01	3	Primary	3 --> 3	Oligodendrocyte_like_tumor	NA	Pri_Recurrence_after_TMZ	1p_19q_codeleted	CNA_Group_ 3	1.3895032171715499E-2	9.7813445340040293E-3	S
A_GGGCGGCAAATGAATT-1	0	KM4242_01	3	Primary	3 --> 3	Proneural_OPC_like_tumor	G3	Pri_Recurrence_after_TMZ	1p_19q_codeleted	CNA_Group_ 1	-1.48059295042803E-2	-4.5000454570015502E-2	G1
A_GGGCGGGTTCCCTACG-1	0	KM4242_01	3	Primary	3 --> 3	Proneural_OPC_like_tumor	G3	Pri_Recurrence_after_TMZ	1p_19q_codeleted	CNA_Group_ 1	1.45744604931855E-2	-2.2328358708081999E-2	S
A_GGGCGTACATTTATAT-1	1	KM4242_01	3	Primary	3 --> 3	Oligodendrocyte_like_tumor	NA	Pri_Recurrence_after_TMZ	1p_19q_codeleted	CNA_Group_ 2	1.9992861137453102E-2	-2.18991727685721E-2	S
A_GGGCGTCACCACGTAA-1	0	KM4242_01	3	Primary	3 --> 3	Proneural_OPC_like_tumor	G3	Pri_Recurrence_after_TMZ	1p_19q_codeleted	CNA_Group_ 1	1.3691848076787701E-2	3.2719467959050598E-2	G2M
A_GGGCGTCCACTGGCTC-1	4	KM4242_01	3	Primary	3 --> 3	Pericyte_Endothelial	Pericyte_Endothelial	Pri_Recurrence_after_TMZ	1p_19q_codeleted	CNA_Group_ 2	3.9603241826006597E-3	1.53028761021573E-2	G2M
A_GGGCGTGGTTTCCCAG-1	0	KM4242_01	3	Primary	3 --> 3	Proneural_OPC_like_tumor	G3	Pri_Recurrence_after_TMZ	1p_19q_codeleted	CNA_Group_ 1	4.4770267361572302E-2	3.3338249780151099E-3	S
A_GGGCTATGATCGATGG-1	0	KM4242_01	3	Primary	3 --> 3	Proneural_OPC_like_tumor	G3	Pri_Recurrence_after_TMZ	1p_19q_codeleted	CNA_Group_ 1	6.9297800568556799E-3	1.4911151688627999E-3	S
A_GGGCTCATCGAACCCA-1	1	KM4242_01	3	Primary	3 --> 3	Oligodendrocyte_like_tumor	NA	Pri_Recurrence_after_TMZ	1p_19q_codeleted	CNA_Group_ 3	8.5590945943638704E-3	-6.3086321366601196E-3	S
A_GGGCTGCCTAGGGCGA-1	1	KM4242_01	3	Primary	3 --> 3	Oligodendrocyte_like_tumor	NA	Pri_Recurrence_after_TMZ	1p_19q_codeleted	CNA_Group_ 3	8.0102539362008299E-2	1.6857051696196199E-2	S
A_GGGCTGGTTAGTCGCG-1	0	KM4242_01	3	Primary	3 --> 3	Proneural_OPC_like_tumor	G3	Pri_Recurrence_after_TMZ	1p_19q_codeleted	CNA_Group_ 1	2.8272282483407601E-2	3.6678377135496203E-2	G2M
A_GGGTACTTCATGAACT-1	0	KM4242_01	3	Primary	3 --> 3	Proneural_OPC_like_tumor	G3	Pri_Recurrence_after_TMZ	1p_19q_codeleted	CNA_Group_ 1	-1.0886997085088599E-3	-2.56486291179031E-2	G1
A_GGGTATGTATGCACTT-1	0	KM4242_01	3	Primary	3 --> 3	Proneural_OPC_like_tumor	G3	Pri_Recurrence_after_TMZ	1p_19q_codeleted	CNA_Group_ 1	-2.18307583036986E-2	-3.1277536680031803E-2	G1
A_GGGTCACCGTGACGGT-1	0	KM4242_01	3	Primary	3 --> 3	Proneural_OPC_like_tumor	G3	Pri_Recurrence_after_TMZ	1p_19q_codeleted	CNA_Group_ 1	2.1082032932675802E-2	-2.5412363551626699E-2	S
A_GGGTGACACCTTAACT-1	0	KM4242_01	3	Primary	3 --> 3	Proneural_OPC_like_tumor	G3	Pri_Recurrence_after_TMZ	1p_19q_codeleted	CNA_Group_ 1	4.1830932138366098E-2	-2.1916688041002498E-3	S
A_GGGTGTTTCAGCTATG-1	1	KM4242_01	3	Primary	3 --> 3	Oligodendrocyte_like_tumor	NA	Pri_Recurrence_after_TMZ	1p_19q_codeleted	CNA_Group_ 3	3.9492411685602802E-2	2.2458154529448202E-2	S
A_GGGTTAACATTTGAGT-1	0	KM4242_01	3	Primary	3 --> 3	Proneural_OPC_like_tumor	G3	Pri_Recurrence_after_TMZ	1p_19q_codeleted	CNA_Group_ 2	0.111667119939981	1.9305638047067999E-2	S
A_GGTACAAACATGCTAT-1	0	KM4242_01	3	Primary	3 --> 3	Proneural_OPC_like_tumor	G3	Pri_Recurrence_after_TMZ	1p_19q_codeleted	CNA_Group_ 1	-4.0153719540661197E-3	3.0398524262388999E-2	G2M
A_GGTACATCTGGGACGA-1	0	KM4242_01	3	Primary	3 --> 3	Proneural_OPC_like_tumor	G3	Pri_Recurrence_after_TMZ	1p_19q_codeleted	CNA_Group_ 1	-8.2555980590052792E-3	-6.4368586591031396E-2	G1
A_GGTAGAAGACCGCCTG-1	0	KM4242_01	3	Primary	3 --> 3	Proneural_OPC_like_tumor	G3	Pri_Recurrence_after_TMZ	1p_19q_codeleted	CNA_Group_ 1	-2.34102494058409E-2	4.3660840242610698E-3	G2M
A_GGTAGACCGTTGGGCG-1	0	KM4242_01	3	Primary	3 --> 3	Proneural_OPC_like_tumor	G3	Pri_Recurrence_after_TMZ	1p_19q_codeleted	CNA_Group_ 2	-7.5104574276477704E-3	-6.1815568241515599E-3	G1
A_GGTAGTGCTCGCACCA-1	1	KM4242_01	3	Primary	3 --> 3	Oligodendrocyte_like_tumor	NA	Pri_Recurrence_after_TMZ	1p_19q_codeleted	CNA_Group_ 3	-3.9051865294739599E-2	4.9438809498127498E-2	G2M
A_GGTATTGCCGAGTTTA-1	0	KM4242_01	3	Primary	3 --> 3	Proneural_OPC_like_tumor	G3	Pri_Recurrence_after_TMZ	1p_19q_codeleted	CNA_Group_ 1	3.21421474148949E-3	-2.3379228970198099E-4	S
A_GGTCAGTGGGTCCCAC-1	0	KM4242_01	3	Primary	3 --> 3	Proneural_OPC_like_tumor	G3	Pri_Recurrence_after_TMZ	1p_19q_codeleted	CNA_Group_ 1	0.117008917180982	5.3194950875727398E-2	S
A_GGTCGGCCAGGAGCTT-1	7	KM4242_01	3	Primary	3 --> 3	Cortical_neurons_and_tumor_cells	Cortical_neurons_and_tumor_cells	Pri_Recurrence_after_TMZ	non_tumor	CNA_Group_ 2	2.69821951871538E-2	2.8080086955339999E-2	G2M
A_GGTCGGTCGTCCACAG-1	0	KM4242_01	3	Primary	3 --> 3	Proneural_OPC_like_tumor	G3	Pri_Recurrence_after_TMZ	1p_19q_codeleted	CNA_Group_ 1	0.14199925132060601	-3.26386473393439E-2	S
A_GGTCTGAGAATCTGGA-1	1	KM4242_01	3	Primary	3 --> 3	Oligodendrocyte_like_tumor	NA	Pri_Recurrence_after_TMZ	1p_19q_codeleted	CNA_Group_ 3	-4.4571687228701197E-3	9.2011498119141007E-3	G2M
A_GGTCTTGAGCGCTCTT-1	0	KM4242_01	3	Primary	3 --> 3	Proneural_OPC_like_tumor	G3	Pri_Recurrence_after_TMZ	1p_19q_codeleted	CNA_Group_ 2	-1.5106692507258601E-3	6.9790290510604702E-2	G2M
A_GGTGAAGTACAGGGAT-1	0	KM4242_01	3	Primary	3 --> 3	Proneural_OPC_like_tumor	G3	Pri_Recurrence_after_TMZ	1p_19q_codeleted	CNA_Group_ 1	6.9011409421905506E-2	-0.13847316789396699	S
A_GGTGAGATGCAGATAA-1	4	KM4242_01	3	Primary	3 --> 3	Pericyte_Endothelial	Pericyte_Endothelial	Pri_Recurrence_after_TMZ	1p_19q_codeleted	CNA_Group_ 3	5.91932653115134E-2	2.9223168215257401E-3	S
A_GGTGATAAGGAGCAGT-1	1	KM4242_01	3	Primary	3 --> 3	Oligodendrocyte_like_tumor	NA	Pri_Recurrence_after_TMZ	1p_19q_codeleted	CNA_Group_ 3	-2.1655552210258201E-2	1.3486127586003799E-3	G2M
A_GGTGCGGATAAGTGGC-1	1	KM4242_01	3	Primary	3 --> 3	Oligodendrocyte_like_tumor	NA	Pri_Recurrence_after_TMZ	1p_19q_codeleted	CNA_Group_ 4	-4.8244533919327398E-2	-1.4820471597646601E-2	G1
A_GGTGCTGATCACAAAG-1	4	KM4242_01	3	Primary	3 --> 3	Pericyte_Endothelial	Pericyte_Endothelial	Pri_Recurrence_after_TMZ	1p_19q_codeleted	CNA_Group_ 3	6.0423247610787399E-2	7.3255387426496302E-2	G2M
A_GGTGCTGGTACACATT-1	0	KM4242_01	3	Primary	3 --> 3	Proneural_OPC_like_tumor	G3	Pri_Recurrence_after_TMZ	1p_19q_codeleted	CNA_Group_ 1	0.113030571492424	-3.97886967122245E-2	S
A_GGTGGACTGCTCTGGC-1	0	KM4242_01	3	Primary	3 --> 3	Proneural_OPC_like_tumor	G3	Pri_Recurrence_after_TMZ	1p_19q_codeleted	CNA_Group_ 1	2.45719114242351E-2	-4.8659710644635298E-2	S
A_GGTTACCACCCTCGGG-1	0	KM4242_01	3	Primary	3 --> 3	Proneural_OPC_like_tumor	G3	Pri_Recurrence_after_TMZ	1p_19q_codeleted	CNA_Group_ 1	1.4994527191003399E-2	-7.4165078589748697E-3	S
A_GGTTAGCTATATGTCT-1	0	KM4242_01	3	Primary	3 --> 3	Proneural_OPC_like_tumor	NA	Pri_Recurrence_after_TMZ	1p_19q_codeleted	CNA_Group_ 1	-5.5917522151310198E-2	-3.7512551751147899E-2	G1
A_GGTTAGGCTTGGAGAA-1	2	KM4242_01	3	Primary	3 --> 3	NPC_like_tumor	G3	Pri_Recurrence_after_TMZ	non_tumor	NA	1.8379663518075899E-2	8.6663529992586103E-3	S
A_GGTTAGTTACGGCGCC-1	1	KM4242_01	3	Primary	3 --> 3	Oligodendrocyte_like_tumor	G3	Pri_Recurrence_after_TMZ	1p_19q_codeleted	CNA_Group_ 3	-9.2915745333328303E-2	-2.25822260333771E-2	G1
A_GGTTGTGTAGCCTGGC-1	0	KM4242_01	3	Primary	3 --> 3	Proneural_OPC_like_tumor	G3	Pri_Recurrence_after_TMZ	1p_19q_codeleted	CNA_Group_ 2	7.5529132014271694E-2	-1.6995636602945601E-2	S
A_GGTTTACAATCTCAAT-1	1	KM4242_01	3	Primary	3 --> 3	Oligodendrocyte_like_tumor	NA	Pri_Recurrence_after_TMZ	1p_19q_codeleted	CNA_Group_ 3	-9.3443019920429107E-3	6.1739708181836198E-3	G2M
A_GGTTTCAATCGGTCAG-1	1	KM4242_01	3	Primary	3 --> 3	Oligodendrocyte_like_tumor	NA	Pri_Recurrence_after_TMZ	1p_19q_codeleted	CNA_Group_ 2	-4.3579322568630001E-2	7.0188878194080095E-2	G2M
A_GTAAGCGGGCAGTCAG-1	1	KM4242_01	3	Primary	3 --> 3	Oligodendrocyte_like_tumor	NA	Pri_Recurrence_after_TMZ	1p_19q_codeleted	CNA_Group_ 3	3.5731266485585202E-2	-1.7942246601314001E-2	S
A_GTAAGTAACAGTCTGG-1	1	KM4242_01	3	Primary	3 --> 3	Oligodendrocyte_like_tumor	NA	Pri_Recurrence_after_TMZ	1p_19q_codeleted	CNA_Group_ 3	6.1944180271723201E-2	-3.9567723769936801E-2	S
A_GTAAGTAGGGTATACC-1	0	KM4242_01	3	Primary	3 --> 3	Proneural_OPC_like_tumor	G3	Pri_Recurrence_after_TMZ	1p_19q_codeleted	CNA_Group_ 1	6.9628639965628E-2	-6.2613939128513096E-2	S
A_GTAATCTGATTCTTCG-1	0	KM4242_01	3	Primary	3 --> 3	Proneural_OPC_like_tumor	G3	Pri_Recurrence_after_TMZ	1p_19q_codeleted	CNA_Group_ 1	-3.7942221302800401E-3	6.7342757137292299E-3	G2M
A_GTACACTTACCTGAAG-1	0	KM4242_01	3	Primary	3 --> 3	Proneural_OPC_like_tumor	NA	Pri_Recurrence_after_TMZ	1p_19q_codeleted	CNA_Group_ 1	7.4397038522331996E-2	6.9814350946615894E-2	S
A_GTACAGAGGCAAGGGT-1	1	KM4242_01	3	Primary	3 --> 3	Oligodendrocyte_like_tumor	NA	Pri_Recurrence_after_TMZ	1p_19q_codeleted	CNA_Group_ 2	6.6972880990488204E-2	-1.0766272358193601E-3	S
A_GTACGAGATTGCGACA-1	1	KM4242_01	3	Primary	3 --> 3	Oligodendrocyte_like_tumor	NA	Pri_Recurrence_after_TMZ	1p_19q_codeleted	CNA_Group_ 3	4.3716190300962902E-2	-1.9357770201270601E-2	S
A_GTACGCTTCATTGCAC-1	6	KM4242_01	3	Primary	3 --> 3	IEG	G3	Pri_Recurrence_after_TMZ	1p_19q_codeleted	CNA_Group_ 1	-3.7620369229376801E-3	1.11534070317174E-2	G2M
A_GTACGTTTGCCCGTCA-1	0	KM4242_01	3	Primary	3 --> 3	Proneural_OPC_like_tumor	G3	Pri_Recurrence_after_TMZ	1p_19q_codeleted	CNA_Group_ 1	2.3412619106559598E-3	7.3604738045273399E-2	G2M
A_GTACTAAGATTTGGAG-1	4	KM4242_01	3	Primary	3 --> 3	Pericyte_Endothelial	Pericyte_Endothelial	Pri_Recurrence_after_TMZ	1p_19q_codeleted	CNA_Group_ 3	1.5125709283149401E-3	-8.9160540327890107E-3	S
A_GTACTCCCTTATCGCT-1	0	KM4242_01	3	Primary	3 --> 3	Proneural_OPC_like_tumor	G3	Pri_Recurrence_after_TMZ	1p_19q_codeleted	CNA_Group_ 1	2.0177103357817101E-2	-3.2119682940275097E-2	S
A_GTACTGGAGTTAGACC-1	1	KM4242_01	3	Primary	3 --> 3	Oligodendrocyte_like_tumor	NA	Pri_Recurrence_after_TMZ	1p_19q_codeleted	CNA_Group_ 3	2.6283843458304802E-2	-4.4110410605333099E-2	S
A_GTACTTGGGCACTTCT-1	2	KM4242_01	3	Primary	3 --> 3	NPC_like_tumor	G3	Pri_Recurrence_after_TMZ	non_tumor	NA	-2.6446180846658499E-3	-1.85194796763846E-2	G1
A_GTAGACACGCCTGACT-1	0	KM4242_01	3	Primary	3 --> 3	Proneural_OPC_like_tumor	G3	Pri_Recurrence_after_TMZ	1p_19q_codeleted	CNA_Group_ 2	2.0158337042720999E-2	-1.17319392677856E-3	S
A_GTAGCCAAACATGGGA-1	0	KM4242_01	3	Primary	3 --> 3	Proneural_OPC_like_tumor	G3	Pri_Recurrence_after_TMZ	1p_19q_codeleted	CNA_Group_ 3	1.64064793141101E-3	-2.94126410072768E-2	S
A_GTAGCGGCTATACACT-1	0	KM4242_01	3	Primary	3 --> 3	Proneural_OPC_like_tumor	NA	Pri_Recurrence_after_TMZ	1p_19q_codeleted	CNA_Group_ 1	-8.3744700885171903E-3	2.9657472521448501E-3	G2M
A_GTAGCTTCCTCTTGTT-1	1	KM4242_01	3	Primary	3 --> 3	Oligodendrocyte_like_tumor	NA	Pri_Recurrence_after_TMZ	1p_19q_codeleted	CNA_Group_ 3	-3.5875069672271498E-3	3.62959005422962E-2	G2M
A_GTAGGTGATCCGTGTA-1	1	KM4242_01	3	Primary	3 --> 3	Oligodendrocyte_like_tumor	NA	Pri_Recurrence_after_TMZ	1p_19q_codeleted	CNA_Group_ 2	-5.1762271750287997E-2	-2.2781419782042E-3	G1
A_GTAGTCGCGGGAATCA-1	6	KM4242_01	3	Primary	3 --> 3	IEG	NA	Pri_Recurrence_after_TMZ	1p_19q_codeleted	CNA_Group_ 1	6.4272263840146296E-2	0.11321327488795301	G2M
A_GTAGTCTACGATATTG-1	0	KM4242_01	3	Primary	3 --> 3	Proneural_OPC_like_tumor	G3	Pri_Recurrence_after_TMZ	1p_19q_codeleted	CNA_Group_ 1	-3.5335031161644201E-2	1.8634251145879299E-2	G2M
A_GTATAGGACTCAGTAG-1	1	KM4242_01	3	Primary	3 --> 3	Oligodendrocyte_like_tumor	NA	Pri_Recurrence_after_TMZ	1p_19q_codeleted	CNA_Group_ 2	2.1055311437461099E-2	3.0643357384125401E-2	G2M
A_GTATCAGCTTGGGTTC-1	0	KM4242_01	3	Primary	3 --> 3	Proneural_OPC_like_tumor	G3	Pri_Recurrence_after_TMZ	1p_19q_codeleted	CNA_Group_ 1	1.45737905111839E-2	-1.23607692830468E-2	S
A_GTATCCTTTGGTAACC-1	0	KM4242_01	3	Primary	3 --> 3	Proneural_OPC_like_tumor	G3	Pri_Recurrence_after_TMZ	1p_19q_codeleted	CNA_Group_ 1	9.4558498979931294E-2	3.5886130934763602E-2	S
A_GTATCTTTCATAACCA-1	0	KM4242_01	3	Primary	3 --> 3	Proneural_OPC_like_tumor	G3	Pri_Recurrence_after_TMZ	1p_19q_codeleted	CNA_Group_ 1	-3.6148509232834497E-2	2.6644519639915199E-2	G2M
A_GTATGTGGGTCTAGTT-1	1	KM4242_01	3	Primary	3 --> 3	Oligodendrocyte_like_tumor	NA	Pri_Recurrence_after_TMZ	1p_19q_codeleted	CNA_Group_ 3	-5.88448766903256E-2	1.7534008260373601E-2	G2M
A_GTATTCTGAGAAACGA-1	0	KM4242_01	3	Primary	3 --> 3	Proneural_OPC_like_tumor	G3	Pri_Recurrence_after_TMZ	1p_19q_codeleted	CNA_Group_ 1	5.9349426794734698E-2	-5.2680480372181097E-3	S
A_GTCAAGCGGACTCGGG-1	1	KM4242_01	3	Primary	3 --> 3	Oligodendrocyte_like_tumor	NA	Pri_Recurrence_after_TMZ	1p_19q_codeleted	CNA_Group_ 1	1.8907621350795399E-2	2.0030535264577202E-3	S
A_GTCACTCTCCAAATCT-1	0	KM4242_01	3	Primary	3 --> 3	Proneural_OPC_like_tumor	G3	Pri_Recurrence_after_TMZ	1p_19q_codeleted	CNA_Group_ 3	1.2093474927350301E-2	4.2670075174306198E-3	S
A_GTCAGAATAGTCTATG-1	2	KM4242_01	3	Primary	3 --> 3	NPC_like_tumor	G3	Pri_Recurrence_after_TMZ	non_tumor	NA	1.19163300341791E-2	-1.9936560405798302E-3	S
A_GTCAGTTTGGTAGTCG-1	0	KM4242_01	3	Primary	3 --> 3	Proneural_OPC_like_tumor	G3	Pri_Recurrence_after_TMZ	1p_19q_codeleted	CNA_Group_ 3	-2.8202598923843199E-2	-1.17896202915226E-3	G1
A_GTCATGCACCTCCGTT-1	0	KM4242_01	3	Primary	3 --> 3	Proneural_OPC_like_tumor	NA	Pri_Recurrence_after_TMZ	1p_19q_codeleted	CNA_Group_ 1	-1.2814635548782099E-2	8.7875758289675907E-2	G2M
A_GTCATGCGCGAGGGCT-1	0	KM4242_01	3	Primary	3 --> 3	Proneural_OPC_like_tumor	NA	Pri_Recurrence_after_TMZ	1p_19q_codeleted	CNA_Group_ 1	4.7266382380827698E-2	1.72367638965879E-2	S
A_GTCATGGACATGACTA-1	1	KM4242_01	3	Primary	3 --> 3	Oligodendrocyte_like_tumor	NA	Pri_Recurrence_after_TMZ	1p_19q_codeleted	CNA_Group_ 3	9.0096830848557206E-3	6.6842194100200494E-2	G2M
A_GTCATTAGAGCGAACG-1	0	KM4242_01	3	Primary	3 --> 3	Proneural_OPC_like_tumor	NA	Pri_Recurrence_after_TMZ	1p_19q_codeleted	CNA_Group_ 1	5.8160114637819497E-2	-1.00356629030955E-2	S
A_GTCATTGCATTGACCC-1	5	KM4242_01	3	Primary	3 --> 3	NPC_like_and_DNA_damage	G3	Pri_Recurrence_after_TMZ	1p_19q_codeleted	CNA_Group_ 3	-3.7196075477109097E-2	8.7983538116650894E-3	G2M
A_GTCCCAACGTAAAGTA-1	1	KM4242_01	3	Primary	3 --> 3	Oligodendrocyte_like_tumor	NA	Pri_Recurrence_after_TMZ	1p_19q_codeleted	CNA_Group_ 1	1.4047833008081399E-2	3.8933360924848101E-2	G2M
A_GTCCCGCGACGTTATG-1	6	KM4242_01	3	Primary	3 --> 3	IEG	G3	Pri_Recurrence_after_TMZ	1p_19q_codeleted	CNA_Group_ 1	-1.6602017068561702E-2	2.10849374641419E-2	G2M
A_GTCCGGACCTGAAATT-1	0	KM4242_01	3	Primary	3 --> 3	Proneural_OPC_like_tumor	NA	Pri_Recurrence_after_TMZ	1p_19q_codeleted	CNA_Group_ 1	6.6865767114183102E-3	3.4249484801420899E-2	G2M
A_GTCCGGCTGAATTGCG-1	0	KM4242_01	3	Primary	3 --> 3	Proneural_OPC_like_tumor	G3	Pri_Recurrence_after_TMZ	1p_19q_codeleted	CNA_Group_ 1	5.0206508165907902E-2	-5.7356037382812796E-3	S
A_GTCCGGGTTCACATTA-1	0	KM4242_01	3	Primary	3 --> 3	Proneural_OPC_like_tumor	G3	Pri_Recurrence_after_TMZ	1p_19q_codeleted	CNA_Group_ 1	6.7109317031136401E-2	-3.7257533238188298E-2	S
A_GTCGCGTAACCCGTTG-1	0	KM4242_01	3	Primary	3 --> 3	Proneural_OPC_like_tumor	NA	Pri_Recurrence_after_TMZ	1p_19q_codeleted	CNA_Group_ 1	0.13812504414676799	4.18891230595827E-2	S
A_GTCGGATATCTCAGAC-1	0	KM4242_01	3	Primary	3 --> 3	Proneural_OPC_like_tumor	G3	Pri_Recurrence_after_TMZ	1p_19q_codeleted	CNA_Group_ 1	3.96099718346841E-2	-1.08988316513374E-2	S
A_GTCGGATGTAGCGCGC-1	0	KM4242_01	3	Primary	3 --> 3	Proneural_OPC_like_tumor	NA	Pri_Recurrence_after_TMZ	1p_19q_codeleted	CNA_Group_ 2	-4.72917209433238E-4	-3.6373399050647501E-2	G1
A_GTCGGGAAGCAGAAAC-1	0	KM4242_01	3	Primary	3 --> 3	Proneural_OPC_like_tumor	G3	Pri_Recurrence_after_TMZ	1p_19q_codeleted	CNA_Group_ 2	-3.9757473004955997E-3	-1.6112385751432898E-2	G1
A_GTCGTACCATCTCGGG-1	0	KM4242_01	3	Primary	3 --> 3	Proneural_OPC_like_tumor	G3	Pri_Recurrence_after_TMZ	1p_19q_codeleted	CNA_Group_ 2	5.5679093867628898E-2	3.3131201326781899E-2	S
A_GTCGTTATTCGCTTAT-1	6	KM4242_01	3	Primary	3 --> 3	IEG	NA	Pri_Recurrence_after_TMZ	1p_19q_codeleted	CNA_Group_ 1	0.12104761647624	1.72036968119809E-2	S
A_GTCTACTCAATTACAA-1	0	KM4242_01	3	Primary	3 --> 3	Proneural_OPC_like_tumor	G3	Pri_Recurrence_after_TMZ	1p_19q_codeleted	CNA_Group_ 1	1.65101026782132E-2	2.3998097670419799E-2	G2M
A_GTCTAGTGAGCCGCTT-1	0	KM4242_01	3	Primary	3 --> 3	Proneural_OPC_like_tumor	G3	Pri_Recurrence_after_TMZ	1p_19q_codeleted	CNA_Group_ 1	7.0092310841393404E-2	7.0548746091844694E-2	G2M
A_GTCTATCTGAGTTTCT-1	0	KM4242_01	3	Primary	3 --> 3	Proneural_OPC_like_tumor	G3	Pri_Recurrence_after_TMZ	1p_19q_codeleted	CNA_Group_ 1	0.100839330960135	-3.2314967195378998E-2	S
A_GTCTCAAGGCCCGGCT-1	0	KM4242_01	3	Primary	3 --> 3	Proneural_OPC_like_tumor	G3	Pri_Recurrence_after_TMZ	1p_19q_codeleted	CNA_Group_ 2	8.4516188851540497E-2	-3.8012110163900499E-2	S
A_GTCTCGATCTGCTTTC-1	1	KM4242_01	3	Primary	3 --> 3	Oligodendrocyte_like_tumor	NA	Pri_Recurrence_after_TMZ	1p_19q_codeleted	CNA_Group_ 2	-1.77883658388934E-2	1.9927765195412499E-2	G2M
A_GTCTGGGCGGTCGAGA-1	0	KM4242_01	3	Primary	3 --> 3	Proneural_OPC_like_tumor	G3	Pri_Recurrence_after_TMZ	1p_19q_codeleted	CNA_Group_ 1	5.5521224881128997E-2	-7.1377959937811398E-4	S
A_GTGAAACGGCGCCACC-1	1	KM4242_01	3	Primary	3 --> 3	Oligodendrocyte_like_tumor	NA	Pri_Recurrence_after_TMZ	1p_19q_codeleted	CNA_Group_ 2	-3.8289495650498301E-2	-1.2533059208153501E-2	G1
A_GTGACAGCTTCCCACT-1	0	KM4242_01	3	Primary	3 --> 3	Proneural_OPC_like_tumor	G3	Pri_Recurrence_after_TMZ	1p_19q_codeleted	CNA_Group_ 2	4.3534610379556998E-2	-1.5945294418142901E-2	S
A_GTGACCGCACACTACG-1	1	KM4242_01	3	Primary	3 --> 3	Oligodendrocyte_like_tumor	NA	Pri_Recurrence_after_TMZ	1p_19q_codeleted	CNA_Group_ 3	3.9587260642487798E-2	4.7455452757893098E-2	G2M
A_GTGACGCAGGTTTCAT-1	0	KM4242_01	3	Primary	3 --> 3	Proneural_OPC_like_tumor	G3	Pri_Recurrence_after_TMZ	1p_19q_codeleted	CNA_Group_ 1	9.6885129098955497E-2	-5.2174666973529703E-2	S
A_GTGACTTCAGTAGTGC-1	0	KM4242_01	3	Primary	3 --> 3	Proneural_OPC_like_tumor	G3	Pri_Recurrence_after_TMZ	1p_19q_codeleted	CNA_Group_ 1	-1.30722228337779E-3	1.33031937059778E-2	G2M
A_GTGAGCGTGCTGCACT-1	2	KM4242_01	3	Primary	3 --> 3	NPC_like_tumor	G3	Pri_Recurrence_after_TMZ	non_tumor	NA	7.2713943663203504E-3	1.96077115094664E-2	G2M
A_GTGAGGACACTTAAGG-1	0	KM4242_01	3	Primary	3 --> 3	Proneural_OPC_like_tumor	NA	Pri_Recurrence_after_TMZ	1p_19q_codeleted	CNA_Group_ 1	-3.9079083700766397E-2	1.2960774992593901E-2	G2M
A_GTGAGTGGTACAACGC-1	0	KM4242_01	3	Primary	3 --> 3	Proneural_OPC_like_tumor	G3	Pri_Recurrence_after_TMZ	1p_19q_codeleted	CNA_Group_ 2	5.2779711174372503E-2	-1.1273170295172E-2	S
A_GTGATCATAGATCTGC-1	0	KM4242_01	3	Primary	3 --> 3	Proneural_OPC_like_tumor	G3	Pri_Recurrence_after_TMZ	1p_19q_codeleted	CNA_Group_ 1	4.4520906537229003E-2	-1.8002373868125799E-2	S
A_GTGATCCTTGTCATGA-1	0	KM4242_01	3	Primary	3 --> 3	Proneural_OPC_like_tumor	G3	Pri_Recurrence_after_TMZ	1p_19q_codeleted	CNA_Group_ 1	9.9336651724576397E-2	0.135854981132251	G2M
A_GTGATTCGCCGCTCAA-1	0	KM4242_01	3	Primary	3 --> 3	Proneural_OPC_like_tumor	G3	Pri_Recurrence_after_TMZ	1p_19q_codeleted	CNA_Group_ 1	-9.90638998756385E-3	7.9995092649810001E-2	G2M
A_GTGCAACAAATGTGGC-1	1	KM4242_01	3	Primary	3 --> 3	Oligodendrocyte_like_tumor	NA	Pri_Recurrence_after_TMZ	1p_19q_codeleted	CNA_Group_ 2	-3.3253105876182798E-2	9.0678686551637893E-3	G2M
A_GTGCACGAAAGTGACT-1	4	KM4242_01	3	Primary	3 --> 3	Pericyte_Endothelial	Pericyte_Endothelial	Pri_Recurrence_after_TMZ	non_tumor	CNA_Group_ 2	3.1945070325804299E-2	-4.7895352962457401E-2	S
A_GTGCCATCACACGGTG-1	0	KM4242_01	3	Primary	3 --> 3	Proneural_OPC_like_tumor	G3	Pri_Recurrence_after_TMZ	1p_19q_codeleted	CNA_Group_ 1	-4.4617589987919697E-2	8.4679112067701401E-2	G2M
A_GTGCCCGTTCGGATTC-1	1	KM4242_01	3	Primary	3 --> 3	Oligodendrocyte_like_tumor	NA	Pri_Recurrence_after_TMZ	1p_19q_codeleted	CNA_Group_ 3	4.9099221013327199E-2	-1.21246633675035E-4	S
A_GTGCCGCTTCAAAGGT-1	0	KM4242_01	3	Primary	3 --> 3	Proneural_OPC_like_tumor	G3	Pri_Recurrence_after_TMZ	1p_19q_codeleted	CNA_Group_ 1	2.6582912187392599E-3	-1.0512713698305601E-2	S
A_GTGCCTGAGACCAAAC-1	0	KM4242_01	3	Primary	3 --> 3	Proneural_OPC_like_tumor	G3	Pri_Recurrence_after_TMZ	1p_19q_codeleted	CNA_Group_ 1	0.198429246469082	7.4111613644736896E-2	S
A_GTGCGAAATCGAACAC-1	5	KM4242_01	3	Primary	3 --> 3	NPC_like_and_DNA_damage	G3	Pri_Recurrence_after_TMZ	1p_19q_codeleted	CNA_Group_ 1	-2.0320203477116799E-2	-1.9602348794692199E-4	G1
A_GTGCGGGTCTCCAAAT-1	4	KM4242_01	3	Primary	3 --> 3	Pericyte_Endothelial	Pericyte_Endothelial	Pri_Recurrence_after_TMZ	1p_19q_codeleted	CNA_Group_ 3	6.1753326261750598E-2	-6.23849039357064E-2	S
A_GTGCGTGTATATGAGC-1	1	KM4242_01	3	Primary	3 --> 3	Oligodendrocyte_like_tumor	NA	Pri_Recurrence_after_TMZ	1p_19q_codeleted	CNA_Group_ 3	-2.7578767762554801E-2	4.8980804864424798E-2	G2M
A_GTGCTCAAGTACTGTC-1	0	KM4242_01	3	Primary	3 --> 3	Proneural_OPC_like_tumor	G3	Pri_Recurrence_after_TMZ	1p_19q_codeleted	CNA_Group_ 1	-1.8500895686142601E-2	2.6170766762796099E-2	G2M
A_GTGGAACCTACATGCG-1	3	KM4242_01	3	Primary	3 --> 3	RBCs	RBCs	Pri_Recurrence_after_TMZ	1p_19q_codeleted	CNA_Group_ 2	2.14106842699292E-2	9.3750690448379196E-3	S
A_GTGGACCAACCCGATT-1	0	KM4242_01	3	Primary	3 --> 3	Proneural_OPC_like_tumor	G3	Pri_Recurrence_after_TMZ	1p_19q_codeleted	CNA_Group_ 1	1.7232004427920802E-2	-4.08871097549399E-2	S
A_GTGGACGCATTTGTCC-1	0	KM4242_01	3	Primary	3 --> 3	Proneural_OPC_like_tumor	G3	Pri_Recurrence_after_TMZ	1p_19q_codeleted	CNA_Group_ 2	-7.3995444468897597E-3	-7.5218238365891603E-3	G1
A_GTGGACGTGCTGAGAC-1	0	KM4242_01	3	Primary	3 --> 3	Proneural_OPC_like_tumor	NA	Pri_Recurrence_after_TMZ	1p_19q_codeleted	CNA_Group_ 1	3.60110895502655E-3	1.6370266988028001E-2	G2M
A_GTGGCGGTCCCAGCGT-1	4	KM4242_01	3	Primary	3 --> 3	Pericyte_Endothelial	Pericyte_Endothelial	Pri_Recurrence_after_TMZ	1p_19q_codeleted	CNA_Group_ 2	5.2621243352145103E-2	1.7286438763375E-2	S
A_GTGGCTGTTTCTGTTC-1	0	KM4242_01	3	Primary	3 --> 3	Proneural_OPC_like_tumor	G3	Pri_Recurrence_after_TMZ	1p_19q_codeleted	CNA_Group_ 1	0.15580289178961501	3.93495910197042E-2	S
A_GTGGGCTTAGACACAC-1	0	KM4242_01	3	Primary	3 --> 3	Proneural_OPC_like_tumor	G3	Pri_Recurrence_after_TMZ	1p_19q_codeleted	CNA_Group_ 1	5.7993700266066997E-2	-5.74628603542073E-2	S
A_GTGGTGGCCAAGTGAA-1	0	KM4242_01	3	Primary	3 --> 3	Proneural_OPC_like_tumor	NA	Pri_Recurrence_after_TMZ	1p_19q_codeleted	CNA_Group_ 1	3.3032780638403002E-2	2.5500547197603501E-2	S
A_GTGGTTTCCGCCTTTC-1	5	KM4242_01	3	Primary	3 --> 3	NPC_like_and_DNA_damage	G3	Pri_Recurrence_after_TMZ	1p_19q_codeleted	CNA_Group_ 1	-7.8416644920029099E-4	-4.5334680241829704E-3	G1
A_GTGTACCTTGGCTACG-1	1	KM4242_01	3	Primary	3 --> 3	Oligodendrocyte_like_tumor	NA	Pri_Recurrence_after_TMZ	1p_19q_codeleted	CNA_Group_ 3	6.7962648389016805E-2	6.6706223261008696E-2	S
A_GTGTATATCAGCGGGC-1	0	KM4242_01	3	Primary	3 --> 3	Proneural_OPC_like_tumor	G3	Pri_Recurrence_after_TMZ	1p_19q_codeleted	CNA_Group_ 3	2.8049104246431901E-2	-5.1080414100539803E-2	S
A_GTGTCGTATAGCGTTC-1	0	KM4242_01	3	Primary	3 --> 3	Proneural_OPC_like_tumor	G3	Pri_Recurrence_after_TMZ	1p_19q_codeleted	CNA_Group_ 1	0.14424889459805401	3.2638734513478297E-2	S
A_GTGTGAATAACTTAGG-1	1	KM4242_01	3	Primary	3 --> 3	Oligodendrocyte_like_tumor	NA	Pri_Recurrence_after_TMZ	1p_19q_codeleted	CNA_Group_ 3	-3.4457871124955602E-2	1.2362943858295301E-2	G2M
A_GTGTTACTATGCGTCC-1	0	KM4242_01	3	Primary	3 --> 3	Proneural_OPC_like_tumor	NA	Pri_Recurrence_after_TMZ	1p_19q_codeleted	CNA_Group_ 1	-7.6803317212515198E-3	-2.9626311739489302E-3	G1
A_GTTAAAGTAGGACTGG-1	7	KM4242_01	3	Primary	3 --> 3	Cortical_neurons_and_tumor_cells	Cortical_neurons_and_tumor_cells	Pri_Recurrence_after_TMZ	non_tumor	CNA_Group_ 1	4.3310413852358398E-2	-2.3426143995296099E-2	S
A_GTTAACATCACTTAAA-1	0	KM4242_01	3	Primary	3 --> 3	Proneural_OPC_like_tumor	G3	Pri_Recurrence_after_TMZ	1p_19q_codeleted	CNA_Group_ 1	1.6761176397694099E-2	3.2404034643754E-2	G2M
A_GTTAAGGGTGCGATGT-1	0	KM4242_01	3	Primary	3 --> 3	Proneural_OPC_like_tumor	G3	Pri_Recurrence_after_TMZ	1p_19q_codeleted	CNA_Group_ 2	-2.7321315139030099E-2	-3.1288186168074897E-2	G1
A_GTTAATGTCTATCTTA-1	5	KM4242_01	3	Primary	3 --> 3	NPC_like_and_DNA_damage	G3	Pri_Recurrence_after_TMZ	non_tumor	CNA_Group_ 2	2.4617005945661598E-2	6.3099413120960401E-2	G2M
A_GTTACAATTGGTGACG-1	0	KM4242_01	3	Primary	3 --> 3	Proneural_OPC_like_tumor	G3	Pri_Recurrence_after_TMZ	1p_19q_codeleted	CNA_Group_ 1	-5.8130456310136504E-3	-0.108592898841672	G1
A_GTTACCTACAACTTGC-1	0	KM4242_01	3	Primary	3 --> 3	Proneural_OPC_like_tumor	G3	Pri_Recurrence_after_TMZ	1p_19q_codeleted	CNA_Group_ 3	-5.3896657738158202E-2	4.2124071198556302E-2	G2M
A_GTTACTTTGGGCCTAG-1	0	KM4242_01	3	Primary	3 --> 3	Proneural_OPC_like_tumor	G3	Pri_Recurrence_after_TMZ	1p_19q_codeleted	CNA_Group_ 1	-1.7055043133351599E-4	2.54512142474498E-2	G2M
A_GTTAGCCCATGACATC-1	0	KM4242_01	3	Primary	3 --> 3	Proneural_OPC_like_tumor	G3	Pri_Recurrence_after_TMZ	1p_19q_codeleted	CNA_Group_ 1	1.5536374708039901E-3	-2.0627669394906002E-2	S
A_GTTATATTATCTCCCT-1	0	KM4242_01	3	Primary	3 --> 3	Proneural_OPC_like_tumor	G3	Pri_Recurrence_after_TMZ	1p_19q_codeleted	CNA_Group_ 2	1.92163210860942E-3	-2.22883859888377E-2	S
A_GTTCACAGGAGTCTAG-1	0	KM4242_01	3	Primary	3 --> 3	Proneural_OPC_like_tumor	G3	Pri_Recurrence_after_TMZ	1p_19q_codeleted	CNA_Group_ 1	4.09180310155247E-2	-2.5418802892781499E-2	S
A_GTTCCAGTCTGACCAT-1	1	KM4242_01	3	Primary	3 --> 3	Oligodendrocyte_like_tumor	NA	Pri_Recurrence_after_TMZ	1p_19q_codeleted	CNA_Group_ 2	4.6741650632752998E-2	4.1332825508146202E-2	S
A_GTTCGCCATAAGTGCC-1	0	KM4242_01	3	Primary	3 --> 3	Proneural_OPC_like_tumor	G3	Pri_Recurrence_after_TMZ	1p_19q_codeleted	CNA_Group_ 1	6.4498315662474395E-2	0.108399560750486	G2M
A_GTTCGTCTAAAGAACT-1	0	KM4242_01	3	Primary	3 --> 3	Proneural_OPC_like_tumor	NA	Pri_Recurrence_after_TMZ	1p_19q_codeleted	CNA_Group_ 1	4.1224839024457997E-2	-3.2519699320785099E-2	S
A_GTTCTTCCCTCGATGT-1	4	KM4242_01	3	Primary	3 --> 3	Pericyte_Endothelial	Pericyte_Endothelial	Pri_Recurrence_after_TMZ	non_tumor	CNA_Group_ 3	1.0754559921728199E-2	8.3402839568292197E-2	G2M
A_GTTGAACCGGTTCCAT-1	0	KM4242_01	3	Primary	3 --> 3	Proneural_OPC_like_tumor	G3	Pri_Recurrence_after_TMZ	1p_19q_codeleted	CNA_Group_ 1	5.3697530468602205E-4	7.3370628180366698E-3	G2M
A_GTTGAGTCCCGCCGGT-1	6	KM4242_01	3	Primary	3 --> 3	IEG	G3	Pri_Recurrence_after_TMZ	1p_19q_codeleted	CNA_Group_ 1	0.136282241709093	-6.1019019014480098E-2	S
A_GTTGCACGGAGTTTCG-1	0	KM4242_01	3	Primary	3 --> 3	Proneural_OPC_like_tumor	NA	Pri_Recurrence_after_TMZ	1p_19q_codeleted	CNA_Group_ 1	2.14535700113146E-2	-2.3062410224186099E-2	S
A_GTTGGATTGAGAACAC-1	1	KM4242_01	3	Primary	3 --> 3	Oligodendrocyte_like_tumor	NA	Pri_Recurrence_after_TMZ	1p_19q_codeleted	CNA_Group_ 2	-2.6130129186342999E-2	1.24975208062237E-2	G2M
A_GTTGGATTTGCGTTGG-1	0	KM4242_01	3	Primary	3 --> 3	Proneural_OPC_like_tumor	G3	Pri_Recurrence_after_TMZ	1p_19q_codeleted	CNA_Group_ 3	-8.4746463921282194E-3	7.3518376378560901E-2	G2M
A_GTTGGTCATGCTATCC-1	0	KM4242_01	3	Primary	3 --> 3	Proneural_OPC_like_tumor	G3	Pri_Recurrence_after_TMZ	1p_19q_codeleted	CNA_Group_ 2	5.1144077560089103E-2	-4.65364411587956E-2	S
A_GTTGTCGTGTTAGTTG-1	1	KM4242_01	3	Primary	3 --> 3	Oligodendrocyte_like_tumor	NA	Pri_Recurrence_after_TMZ	1p_19q_codeleted	CNA_Group_ 2	1.5766011551637299E-3	9.1860040555634508E-3	G2M
A_GTTTACGTTCCATCTG-1	0	KM4242_01	3	Primary	3 --> 3	Proneural_OPC_like_tumor	G3	Pri_Recurrence_after_TMZ	1p_19q_codeleted	CNA_Group_ 3	3.7808608032496201E-2	-1.8607354086960501E-2	S
A_GTTTCATATCGTCGCT-1	5	KM4242_01	3	Primary	3 --> 3	NPC_like_and_DNA_damage	G3	Pri_Recurrence_after_TMZ	1p_19q_codeleted	CNA_Group_ 1	8.0607024475871494E-2	-4.9937488167840403E-2	S
A_GTTTCCTGGAGGGTGA-1	0	KM4242_01	3	Primary	3 --> 3	Proneural_OPC_like_tumor	NA	Pri_Recurrence_after_TMZ	1p_19q_codeleted	CNA_Group_ 1	-1.6064501575193301E-2	-2.6696790756525299E-2	G1
A_GTTTCTAGAGGCGCGG-1	0	KM4242_01	3	Primary	3 --> 3	Proneural_OPC_like_tumor	G3	Pri_Recurrence_after_TMZ	1p_19q_codeleted	CNA_Group_ 1	0.12422441537159599	2.1662051380188702E-2	S
A_GTTTCTGCAGTCTCCC-1	0	KM4242_01	3	Primary	3 --> 3	Proneural_OPC_like_tumor	NA	Pri_Recurrence_after_TMZ	1p_19q_codeleted	CNA_Group_ 1	-5.88131192457247E-3	-3.31708270007638E-3	G1
A_GTTTGACCAAATCCTA-1	0	KM4242_01	3	Primary	3 --> 3	Proneural_OPC_like_tumor	NA	Pri_Recurrence_after_TMZ	1p_19q_codeleted	CNA_Group_ 1	0.110773016655728	6.5709662140610997E-3	S
A_GTTTGGCCCAAGTTAT-1	1	KM4242_01	3	Primary	3 --> 3	Oligodendrocyte_like_tumor	NA	Pri_Recurrence_after_TMZ	1p_19q_codeleted	CNA_Group_ 1	-2.52073367462896E-2	-1.5095164742784399E-2	G1
A_GTTTGGGCTTGTGAGC-1	0	KM4242_01	3	Primary	3 --> 3	Proneural_OPC_like_tumor	G3	Pri_Recurrence_after_TMZ	1p_19q_codeleted	CNA_Group_ 2	-1.86335385501144E-2	-3.6372105219869097E-2	G1
A_GTTTGGGTTTCGCCCG-1	0	KM4242_01	3	Primary	3 --> 3	Proneural_OPC_like_tumor	G3	Pri_Recurrence_after_TMZ	1p_19q_codeleted	CNA_Group_ 1	-6.5449409983929802E-3	-1.12984310876292E-2	G1
A_GTTTGGTAGGGTCAAC-1	0	KM4242_01	3	Primary	3 --> 3	Proneural_OPC_like_tumor	G3	Pri_Recurrence_after_TMZ	1p_19q_codeleted	CNA_Group_ 2	6.2966756308838301E-2	7.9455443402914293E-3	S
A_TAAAGCGTTAGGAGAA-1	1	KM4242_01	3	Primary	3 --> 3	Oligodendrocyte_like_tumor	NA	Pri_Recurrence_after_TMZ	1p_19q_codeleted	CNA_Group_ 3	5.3620491109320101E-2	-3.4456990928429403E-2	S
A_TAAATGAATCCGTTTC-1	0	KM4242_01	3	Primary	3 --> 3	Proneural_OPC_like_tumor	G3	Pri_Recurrence_after_TMZ	1p_19q_codeleted	CNA_Group_ 3	1.97464440188275E-2	-3.5087074724823399E-3	S
A_TAAATTGTGGGTAAAG-1	0	KM4242_01	3	Primary	3 --> 3	Proneural_OPC_like_tumor	G3	Pri_Recurrence_after_TMZ	1p_19q_codeleted	CNA_Group_ 2	3.5935120562514501E-2	-1.8689604198295299E-2	S
A_TAACAAAGGGAGAAGC-1	7	KM4242_01	3	Primary	3 --> 3	Cortical_neurons_and_tumor_cells	Cortical_neurons_and_tumor_cells	Pri_Recurrence_after_TMZ	non_tumor	CNA_Group_ 3	5.2439418348312096E-3	5.5128641316713701E-3	G2M
A_TAACAATATTTGTTGC-1	4	KM4242_01	3	Primary	3 --> 3	Pericyte_Endothelial	Pericyte_Endothelial	Pri_Recurrence_after_TMZ	1p_19q_codeleted	CNA_Group_ 3	2.9293450683132799E-2	1.32847751275646E-2	S
A_TAACATACAATGTGGG-1	0	KM4242_01	3	Primary	3 --> 3	Proneural_OPC_like_tumor	NA	Pri_Recurrence_after_TMZ	1p_19q_codeleted	CNA_Group_ 1	-2.9445288101603899E-2	1.7513615625724802E-2	G2M
A_TAACGCTTTGAGAGCG-1	0	KM4242_01	3	Primary	3 --> 3	Proneural_OPC_like_tumor	G3	Pri_Recurrence_after_TMZ	1p_19q_codeleted	CNA_Group_ 3	6.2969902584183203E-3	4.37832231999197E-3	S
A_TAACTATCGAAGGTCC-1	0	KM4242_01	3	Primary	3 --> 3	Proneural_OPC_like_tumor	G3	Pri_Recurrence_after_TMZ	1p_19q_codeleted	CNA_Group_ 1	1.7044990922664399E-2	6.7386906145368297E-4	S
A_TAACTCATCCGCGCGG-1	0	KM4242_01	3	Primary	3 --> 3	Proneural_OPC_like_tumor	G3	Pri_Recurrence_after_TMZ	1p_19q_codeleted	CNA_Group_ 1	3.18789570754772E-2	2.6022572496864901E-2	S
A_TAAGCAGGCGACACGC-1	2	KM4242_01	3	Primary	3 --> 3	NPC_like_tumor	G3	Pri_Recurrence_after_TMZ	non_tumor	NA	6.7481847730214206E-2	-2.7909451052412701E-2	S
A_TAAGGAACTTGTGGGA-1	1	KM4242_01	3	Primary	3 --> 3	Oligodendrocyte_like_tumor	NA	Pri_Recurrence_after_TMZ	1p_19q_codeleted	CNA_Group_ 3	2.2630247045520302E-3	-4.3712912919348097E-2	S
A_TAAGGCAACATAAGAT-1	1	KM4242_01	3	Primary	3 --> 3	Oligodendrocyte_like_tumor	NA	Pri_Recurrence_after_TMZ	1p_19q_codeleted	CNA_Group_ 2	3.2453194776208602E-2	-2.9090272926819E-2	S
A_TAAGGCATAACATCAA-1	0	KM4242_01	3	Primary	3 --> 3	Proneural_OPC_like_tumor	G3	Pri_Recurrence_after_TMZ	1p_19q_codeleted	CNA_Group_ 1	2.42981151398498E-2	-3.0223223364669299E-2	S
A_TAAGGCCCGTCACCCT-1	0	KM4242_01	3	Primary	3 --> 3	Proneural_OPC_like_tumor	G3	Pri_Recurrence_after_TMZ	1p_19q_codeleted	CNA_Group_ 2	-2.0489908736287601E-2	-4.3805307307596297E-2	G1
A_TAAGGGCTGGGAGAGG-1	2	KM4242_01	3	Primary	3 --> 3	NPC_like_tumor	G3	Pri_Recurrence_after_TMZ	non_tumor	NA	3.1940257940721202E-2	-8.7647102228493604E-2	S
A_TAAGTAACATCTTGAC-1	0	KM4242_01	3	Primary	3 --> 3	Proneural_OPC_like_tumor	G3	Pri_Recurrence_after_TMZ	1p_19q_codeleted	CNA_Group_ 1	3.0295162810520498E-2	1.4480043758233099E-2	S
A_TAATACACAGTAGTAT-1	1	KM4242_01	3	Primary	3 --> 3	Oligodendrocyte_like_tumor	NA	Pri_Recurrence_after_TMZ	1p_19q_codeleted	CNA_Group_ 2	4.1635731902877601E-2	-3.6865384584036501E-2	S
A_TAATACTAGAACAGAC-1	0	KM4242_01	3	Primary	3 --> 3	Proneural_OPC_like_tumor	G3	Pri_Recurrence_after_TMZ	1p_19q_codeleted	CNA_Group_ 1	-1.4310761870359E-2	-2.4586783383301301E-2	G1
A_TAATAGAACAGAGTTA-1	0	KM4242_01	3	Primary	3 --> 3	Proneural_OPC_like_tumor	G3	Pri_Recurrence_after_TMZ	1p_19q_codeleted	CNA_Group_ 1	0.11368659401678299	-8.07580703746755E-2	S
A_TAATAGTGACGACCAG-1	1	KM4242_01	3	Primary	3 --> 3	Oligodendrocyte_like_tumor	NA	Pri_Recurrence_after_TMZ	1p_19q_codeleted	CNA_Group_ 3	4.2267438467417102E-2	-2.8979667151790501E-2	S
A_TAATATTGAAATTCGC-1	1	KM4242_01	3	Primary	3 --> 3	Oligodendrocyte_like_tumor	NA	Pri_Recurrence_after_TMZ	1p_19q_codeleted	CNA_Group_ 3	-4.3626535116704897E-2	-2.22237438642332E-2	G1
A_TAATCGATCCGTACGT-1	1	KM4242_01	3	Primary	3 --> 3	Oligodendrocyte_like_tumor	NA	Pri_Recurrence_after_TMZ	1p_19q_codeleted	CNA_Group_ 3	-1.14668680688683E-2	-8.1059093757212299E-3	G1
A_TAATGAAAGACCCTTG-1	0	KM4242_01	3	Primary	3 --> 3	Proneural_OPC_like_tumor	G3	Pri_Recurrence_after_TMZ	1p_19q_codeleted	CNA_Group_ 3	-2.34338892279305E-2	-1.11883319197888E-2	G1
A_TACAACGCACAACTCA-1	0	KM4242_01	3	Primary	3 --> 3	Proneural_OPC_like_tumor	G3	Pri_Recurrence_after_TMZ	1p_19q_codeleted	CNA_Group_ 1	-1.14546956585311E-2	-5.7050706438963997E-2	G1
A_TACAAGGGCTTCTTTA-1	0	KM4242_01	3	Primary	3 --> 3	Proneural_OPC_like_tumor	G3	Pri_Recurrence_after_TMZ	1p_19q_codeleted	CNA_Group_ 1	-1.2916003368120099E-2	-1.9739523736741101E-2	G1
A_TACAAGTCTCGTGCAT-1	2	KM4242_01	3	Primary	3 --> 3	NPC_like_tumor	G3	Pri_Recurrence_after_TMZ	non_tumor	NA	2.4162395819732799E-2	-5.6920284516747799E-2	S
A_TACACCTCTTCGAATC-1	0	KM4242_01	3	Primary	3 --> 3	Proneural_OPC_like_tumor	G3	Pri_Recurrence_after_TMZ	1p_19q_codeleted	CNA_Group_ 1	8.3577612038584895E-2	8.5517287462957406E-2	G2M
A_TACAGAAACGGTGGGC-1	6	KM4242_01	3	Primary	3 --> 3	IEG	G3	Pri_Recurrence_after_TMZ	1p_19q_codeleted	CNA_Group_ 1	5.8933291917709497E-2	4.9454596213136102E-2	S
A_TACATAGGCATACACC-1	0	KM4242_01	3	Primary	3 --> 3	Proneural_OPC_like_tumor	G3	Pri_Recurrence_after_TMZ	1p_19q_codeleted	CNA_Group_ 1	2.6134586953162099E-2	-9.5950007889130193E-3	S
A_TACATTTCTAACGTGC-1	0	KM4242_01	3	Primary	3 --> 3	Proneural_OPC_like_tumor	G3	Pri_Recurrence_after_TMZ	1p_19q_codeleted	CNA_Group_ 1	2.51648385073669E-2	8.5942995884932805E-4	S
A_TACCAAATAGCCCAGA-1	0	KM4242_01	3	Primary	3 --> 3	Proneural_OPC_like_tumor	G3	Pri_Recurrence_after_TMZ	1p_19q_codeleted	CNA_Group_ 2	8.0278954244153794E-2	-1.8647405840300599E-2	S
A_TACCAATAAAGTACCA-1	6	KM4242_01	3	Primary	3 --> 3	IEG	G3	Pri_Recurrence_after_TMZ	1p_19q_codeleted	CNA_Group_ 1	1.3605699324328801E-2	-1.1326869559760699E-2	S
A_TACCAGAAGTAGGTTC-1	0	KM4242_01	3	Primary	3 --> 3	Proneural_OPC_like_tumor	G3	Pri_Recurrence_after_TMZ	1p_19q_codeleted	CNA_Group_ 1	1.32707042873871E-2	-2.6113772807571201E-2	S
A_TACCGAATAATTGTAA-1	0	KM4242_01	3	Primary	3 --> 3	Proneural_OPC_like_tumor	G3	Pri_Recurrence_after_TMZ	1p_19q_codeleted	CNA_Group_ 1	1.7405935547903699E-2	5.8196018234625203E-2	G2M
A_TACCGGCTCACTGCCC-1	0	KM4242_01	3	Primary	3 --> 3	Proneural_OPC_like_tumor	G3	Pri_Recurrence_after_TMZ	1p_19q_codeleted	CNA_Group_ 3	2.2565183970584799E-2	6.8285119906760797E-2	G2M
A_TACCGGTCGTTTCCAT-1	0	KM4242_01	3	Primary	3 --> 3	Proneural_OPC_like_tumor	G3	Pri_Recurrence_after_TMZ	1p_19q_codeleted	CNA_Group_ 1	2.8138806758729599E-2	1.55299693656813E-3	S
A_TACCGTAGGTTAACTA-1	0	KM4242_01	3	Primary	3 --> 3	Proneural_OPC_like_tumor	G3	Pri_Recurrence_after_TMZ	1p_19q_codeleted	CNA_Group_ 2	1.11708130310222E-2	-3.3878526437572401E-2	S
A_TACCGTGCCTCGGACC-1	0	KM4242_01	3	Primary	3 --> 3	Proneural_OPC_like_tumor	G3	Pri_Recurrence_after_TMZ	1p_19q_codeleted	CNA_Group_ 1	-7.3756603939236602E-3	-2.1898935366182599E-2	G1
A_TACCTACTCCCAGTAT-1	0	KM4242_01	3	Primary	3 --> 3	Proneural_OPC_like_tumor	G3	Pri_Recurrence_after_TMZ	1p_19q_codeleted	CNA_Group_ 1	6.9484374931584603E-2	3.7066689436223203E-2	S
A_TACCTCACGCTTGTAC-1	1	KM4242_01	3	Primary	3 --> 3	Oligodendrocyte_like_tumor	NA	Pri_Recurrence_after_TMZ	1p_19q_codeleted	CNA_Group_ 3	7.2864401125471698E-2	-2.0388828846690001E-3	S
A_TACCTGCTGCACTGTG-1	0	KM4242_01	3	Primary	3 --> 3	Proneural_OPC_like_tumor	G3	Pri_Recurrence_after_TMZ	1p_19q_codeleted	CNA_Group_ 3	-6.1612561698901898E-2	-2.5751217585537799E-2	G1
A_TACGAACACGACTTCA-1	0	KM4242_01	3	Primary	3 --> 3	Proneural_OPC_like_tumor	G3	Pri_Recurrence_after_TMZ	1p_19q_codeleted	CNA_Group_ 1	-5.6116684235257798E-3	-1.7688158302965901E-2	G1
A_TACGACGCTTGCTGCG-1	0	KM4242_01	3	Primary	3 --> 3	Proneural_OPC_like_tumor	G3	Pri_Recurrence_after_TMZ	1p_19q_codeleted	CNA_Group_ 1	4.3032746499784197E-2	-8.7840864625192798E-3	S
A_TACGACTGCCTCTTAG-1	0	KM4242_01	3	Primary	3 --> 3	Proneural_OPC_like_tumor	G3	Pri_Recurrence_after_TMZ	1p_19q_codeleted	CNA_Group_ 1	3.9397021052586599E-2	4.92957138304543E-2	G2M
A_TACGAGAACTTCACGT-1	5	KM4242_01	3	Primary	3 --> 3	NPC_like_and_DNA_damage	G3	Pri_Recurrence_after_TMZ	1p_19q_codeleted	CNA_Group_ 1	-4.7929785516597198E-2	7.54910959730581E-2	G2M
A_TACGATGTTGATCATC-1	5	KM4242_01	3	Primary	3 --> 3	NPC_like_and_DNA_damage	G3	Pri_Recurrence_after_TMZ	1p_19q_codeleted	CNA_Group_ 1	4.0570844913288703E-2	-3.0595080495836001E-2	S
A_TACGCAGTTCTTTCCT-1	0	KM4242_01	3	Primary	3 --> 3	Proneural_OPC_like_tumor	G3	Pri_Recurrence_after_TMZ	1p_19q_codeleted	CNA_Group_ 1	6.4921961132001799E-2	-2.65714790559715E-2	S
A_TACGCCATATTCTAAT-1	0	KM4242_01	3	Primary	3 --> 3	Proneural_OPC_like_tumor	G3	Pri_Recurrence_after_TMZ	1p_19q_codeleted	CNA_Group_ 3	4.4720943706446498E-2	-5.7249686014130604E-3	S
A_TACGCCTCCATTCCGA-1	0	KM4242_01	3	Primary	3 --> 3	Proneural_OPC_like_tumor	G3	Pri_Recurrence_after_TMZ	1p_19q_codeleted	CNA_Group_ 2	3.6208378589417001E-2	8.5277148091810508E-3	S
A_TACGGAAGCCAAACCA-1	0	KM4242_01	3	Primary	3 --> 3	Proneural_OPC_like_tumor	G3	Pri_Recurrence_after_TMZ	1p_19q_codeleted	CNA_Group_ 1	0.182768713516305	-1.67137162818153E-2	S
A_TACGGGATGCTAGCAG-1	4	KM4242_01	3	Primary	3 --> 3	Pericyte_Endothelial	Pericyte_Endothelial	Pri_Recurrence_after_TMZ	non_tumor	CNA_Group_ 3	-4.0101382462429301E-2	1.19136925814351E-2	G2M
A_TACGTGCACTATGCTG-1	0	KM4242_01	3	Primary	3 --> 3	Proneural_OPC_like_tumor	G3	Pri_Recurrence_after_TMZ	1p_19q_codeleted	CNA_Group_ 3	2.86126279751431E-2	-7.8234245597815597E-2	S
A_TACGTGGGCCCAGGGC-1	0	KM4242_01	3	Primary	3 --> 3	Proneural_OPC_like_tumor	G3	Pri_Recurrence_after_TMZ	1p_19q_codeleted	CNA_Group_ 1	0.18541512002122601	0.14126589535675599	S
A_TACGTTTACCGGCAAT-1	5	KM4242_01	3	Primary	3 --> 3	NPC_like_and_DNA_damage	G3	Pri_Recurrence_after_TMZ	1p_19q_codeleted	CNA_Group_ 1	4.7598977099354102E-2	3.5601961724761703E-2	S
A_TACTACGTGCAATGCG-1	0	KM4242_01	3	Primary	3 --> 3	Proneural_OPC_like_tumor	G3	Pri_Recurrence_after_TMZ	1p_19q_codeleted	CNA_Group_ 1	0.11336001954728001	6.2988123691189099E-2	S
A_TACTCGGCACGCCGGG-1	0	KM4242_01	3	Primary	3 --> 3	Proneural_OPC_like_tumor	G3	Pri_Recurrence_after_TMZ	1p_19q_codeleted	CNA_Group_ 1	-2.3035427595512099E-2	-3.2601529389175099E-2	G1
A_TACTCGTTTGAATCAA-1	0	KM4242_01	3	Primary	3 --> 3	Proneural_OPC_like_tumor	G3	Pri_Recurrence_after_TMZ	1p_19q_codeleted	CNA_Group_ 1	3.4932264435211899E-2	-4.42826008491089E-2	S
A_TACTCTCCGAACAAAT-1	1	KM4242_01	3	Primary	3 --> 3	Oligodendrocyte_like_tumor	NA	Pri_Recurrence_after_TMZ	1p_19q_codeleted	CNA_Group_ 2	-1.43297562362397E-2	-2.2464690347078601E-2	G1
A_TACTGGACAGCTCGGC-1	0	KM4242_01	3	Primary	3 --> 3	Proneural_OPC_like_tumor	G3	Pri_Recurrence_after_TMZ	1p_19q_codeleted	CNA_Group_ 1	-5.0495513136915103E-2	-3.3306215818783701E-2	G1
A_TACTTGTTAGTAGTCC-1	1	KM4242_01	3	Primary	3 --> 3	Oligodendrocyte_like_tumor	NA	Pri_Recurrence_after_TMZ	1p_19q_codeleted	CNA_Group_ 3	4.4869468699701397E-2	-6.2177564813784399E-2	S
A_TAGAAAGGTGGCGCTA-1	1	KM4242_01	3	Primary	3 --> 3	Oligodendrocyte_like_tumor	NA	Pri_Recurrence_after_TMZ	1p_19q_codeleted	CNA_Group_ 3	-4.8976070631685999E-2	3.9384501037010002E-2	G2M
A_TAGAAATTCACGTATA-1	0	KM4242_01	3	Primary	3 --> 3	Proneural_OPC_like_tumor	G3	Pri_Recurrence_after_TMZ	1p_19q_codeleted	CNA_Group_ 1	-1.29688002081952E-2	-1.4268521940235999E-2	G1
A_TAGACGAAACGCCAAT-1	0	KM4242_01	3	Primary	3 --> 3	Proneural_OPC_like_tumor	G3	Pri_Recurrence_after_TMZ	1p_19q_codeleted	CNA_Group_ 2	2.6725921372071301E-2	6.5217807006467093E-2	G2M
A_TAGACGCCCGTACCGG-1	1	KM4242_01	3	Primary	3 --> 3	Oligodendrocyte_like_tumor	NA	Pri_Recurrence_after_TMZ	1p_19q_codeleted	CNA_Group_ 3	-8.7594904928691396E-3	1.9921961759807701E-2	G2M
A_TAGAGATCATGCAACT-1	0	KM4242_01	3	Primary	3 --> 3	Proneural_OPC_like_tumor	G3	Pri_Recurrence_after_TMZ	1p_19q_codeleted	CNA_Group_ 1	0.108307590344608	-2.62151365416722E-2	S
A_TAGAGTCTAAGCGAAC-1	0	KM4242_01	3	Primary	3 --> 3	Proneural_OPC_like_tumor	NA	Pri_Recurrence_after_TMZ	1p_19q_codeleted	CNA_Group_ 1	3.9656514400757403E-2	4.0835591169104297E-2	G2M
A_TAGATATGGACTGGAA-1	0	KM4242_01	3	Primary	3 --> 3	Proneural_OPC_like_tumor	G3	Pri_Recurrence_after_TMZ	1p_19q_codeleted	CNA_Group_ 1	2.5033307738147902E-2	2.6779795509828799E-2	G2M
A_TAGATTCCTGGTTATT-1	0	KM4242_01	3	Primary	3 --> 3	Proneural_OPC_like_tumor	G3	Pri_Recurrence_after_TMZ	1p_19q_codeleted	CNA_Group_ 3	-5.0960333806193397E-3	-7.2970395700036703E-2	G1
A_TAGCAACCTGTCACAA-1	2	KM4242_01	3	Primary	3 --> 3	NPC_like_tumor	G3	Pri_Recurrence_after_TMZ	non_tumor	NA	4.3873872778296102E-2	-1.24370529568228E-2	S
A_TAGCAGTATGACTAAA-1	0	KM4242_01	3	Primary	3 --> 3	Proneural_OPC_like_tumor	NA	Pri_Recurrence_after_TMZ	1p_19q_codeleted	CNA_Group_ 1	3.7653670447370301E-2	1.6034422991002498E-2	S
A_TAGCCATTTCAAAGTC-1	4	KM4242_01	3	Primary	3 --> 3	Pericyte_Endothelial	Pericyte_Endothelial	Pri_Recurrence_after_TMZ	1p_19q_codeleted	CNA_Group_ 3	2.2824330036443099E-2	-1.8610189939583101E-2	S
A_TAGCCGGCGGTCAGCG-1	1	KM4242_01	3	Primary	3 --> 3	Oligodendrocyte_like_tumor	NA	Pri_Recurrence_after_TMZ	1p_19q_codeleted	CNA_Group_ 3	3.0256983666480898E-4	1.34893078070335E-2	G2M
A_TAGCGTCCGGTGTGGT-1	0	KM4242_01	3	Primary	3 --> 3	Proneural_OPC_like_tumor	G3	Pri_Recurrence_after_TMZ	1p_19q_codeleted	CNA_Group_ 1	1.64643927850739E-2	-6.0972087272358699E-2	S
A_TAGCGTTGGGTCTTAC-1	0	KM4242_01	3	Primary	3 --> 3	Proneural_OPC_like_tumor	NA	Pri_Recurrence_after_TMZ	1p_19q_codeleted	CNA_Group_ 1	2.6902874733738799E-2	1.3277682632138301E-2	S
A_TAGCTAAGTCCGGGAG-1	0	KM4242_01	3	Primary	3 --> 3	Proneural_OPC_like_tumor	NA	Pri_Recurrence_after_TMZ	1p_19q_codeleted	CNA_Group_ 1	6.2463029087817902E-2	1.60231324137373E-2	S
A_TAGCTAGAAGGCATGA-1	0	KM4242_01	3	Primary	3 --> 3	Proneural_OPC_like_tumor	G3	Pri_Recurrence_after_TMZ	1p_19q_codeleted	CNA_Group_ 1	3.2917211995538098E-2	-2.49441344834192E-4	S
A_TAGCTCGCCTGATAAC-1	0	KM4242_01	3	Primary	3 --> 3	Proneural_OPC_like_tumor	G3	Pri_Recurrence_after_TMZ	1p_19q_codeleted	CNA_Group_ 1	3.7919154312115302E-2	-3.60549545190188E-2	S
A_TAGGCATGTTACGCCA-1	1	KM4242_01	3	Primary	3 --> 3	Oligodendrocyte_like_tumor	NA	Pri_Recurrence_after_TMZ	1p_19q_codeleted	CNA_Group_ 3	2.2531616688179299E-2	1.25244318910158E-2	S
A_TAGGGTGTTTCAAGAG-1	4	KM4242_01	3	Primary	3 --> 3	Pericyte_Endothelial	Pericyte_Endothelial	Pri_Recurrence_after_TMZ	1p_19q_codeleted	CNA_Group_ 2	-1.4349547507495E-2	-6.7155370034645001E-2	G1
A_TAGGTCCAAGTAAGGA-1	0	KM4242_01	3	Primary	3 --> 3	Proneural_OPC_like_tumor	G3	Pri_Recurrence_after_TMZ	1p_19q_codeleted	CNA_Group_ 3	-2.77738845403127E-2	-5.0083604717412203E-2	G1
A_TAGGTGACGATAACCT-1	0	KM4242_01	3	Primary	3 --> 3	Proneural_OPC_like_tumor	G3	Pri_Recurrence_after_TMZ	1p_19q_codeleted	CNA_Group_ 2	-3.12536313461809E-2	-2.7961460361069699E-2	G1
A_TAGGTGAGCCCTACTC-1	0	KM4242_01	3	Primary	3 --> 3	Proneural_OPC_like_tumor	G3	Pri_Recurrence_after_TMZ	1p_19q_codeleted	CNA_Group_ 1	-1.5856307616248701E-2	2.3811375751611401E-2	G2M
A_TAGGTGTTCCACAGAT-1	3	KM4242_01	3	Primary	3 --> 3	RBCs	RBCs	Pri_Recurrence_after_TMZ	NA	NA	-3.1358316996057498E-2	-2.7211820065183401E-2	G1
A_TAGGTTCGAGTTCGTC-1	0	KM4242_01	3	Primary	3 --> 3	Proneural_OPC_like_tumor	NA	Pri_Recurrence_after_TMZ	1p_19q_codeleted	CNA_Group_ 3	4.3811206896887398E-3	2.3321789922721801E-2	G2M
A_TAGTCCGCAGAGAATG-1	0	KM4242_01	3	Primary	3 --> 3	Proneural_OPC_like_tumor	G3	Pri_Recurrence_after_TMZ	1p_19q_codeleted	CNA_Group_ 2	9.8224368722052993E-2	2.5057967617199799E-2	S
A_TAGTCTAACAACGAGA-1	5	KM4242_01	3	Primary	3 --> 3	NPC_like_and_DNA_damage	G3	Pri_Recurrence_after_TMZ	1p_19q_codeleted	CNA_Group_ 1	-9.2516424366622697E-3	-3.2314640153480803E-2	G1
A_TAGTGCCCTCCAGAGT-1	0	KM4242_01	3	Primary	3 --> 3	Proneural_OPC_like_tumor	G3	Pri_Recurrence_after_TMZ	1p_19q_codeleted	CNA_Group_ 1	5.0589500157070297E-2	-8.5031577639087894E-3	S
A_TAGTTTATTCTTGCTT-1	0	KM4242_01	3	Primary	3 --> 3	Proneural_OPC_like_tumor	NA	Pri_Recurrence_after_TMZ	1p_19q_codeleted	CNA_Group_ 2	-2.3638419254817501E-2	-6.0277776306682601E-2	G1
A_TATAAATCCACAAGCT-1	2	KM4242_01	3	Primary	3 --> 3	NPC_like_tumor	Neurons	Pri_Recurrence_after_TMZ	non_tumor	NA	-3.49309913929539E-2	6.0035403653831603E-3	G2M
A_TATAAGTGAGGATAGC-1	0	KM4242_01	3	Primary	3 --> 3	Proneural_OPC_like_tumor	G3	Pri_Recurrence_after_TMZ	1p_19q_codeleted	CNA_Group_ 3	2.3330413762201199E-2	-1.2688086834775601E-2	S
A_TATACACAGACGCCTT-1	0	KM4242_01	3	Primary	3 --> 3	Proneural_OPC_like_tumor	G3	Pri_Recurrence_after_TMZ	1p_19q_codeleted	CNA_Group_ 1	3.4093076768658602E-2	-1.9742127884139701E-2	S
A_TATACACGCAAAGTAT-1	7	KM4242_01	3	Primary	3 --> 3	Cortical_neurons_and_tumor_cells	Cortical_neurons_and_tumor_cells	Pri_Recurrence_after_TMZ	non_tumor	CNA_Group_ 1	-6.9541493555973402E-2	5.3172938209618001E-3	G2M
A_TATACGCGTCATCACT-1	0	KM4242_01	3	Primary	3 --> 3	Proneural_OPC_like_tumor	G3	Pri_Recurrence_after_TMZ	1p_19q_codeleted	CNA_Group_ 2	-2.9490240343945599E-2	-3.7783693440042003E-2	G1
A_TATAGGGTACTCATGA-1	5	KM4242_01	3	Primary	3 --> 3	NPC_like_and_DNA_damage	G3	Pri_Recurrence_after_TMZ	1p_19q_codeleted	CNA_Group_ 1	-1.68694756212147E-2	-1.76946093772288E-2	G1
A_TATCCAATTGGTTATC-1	0	KM4242_01	3	Primary	3 --> 3	Proneural_OPC_like_tumor	G3	Pri_Recurrence_after_TMZ	1p_19q_codeleted	CNA_Group_ 1	6.2194570758997501E-2	2.10337085526121E-2	S
A_TATCCATATCATGCGA-1	1	KM4242_01	3	Primary	3 --> 3	Oligodendrocyte_like_tumor	NA	Pri_Recurrence_after_TMZ	1p_19q_codeleted	CNA_Group_ 3	4.02514760528071E-2	-2.7947084230571299E-2	S
A_TATCCGCACCGTCGGG-1	0	KM4242_01	3	Primary	3 --> 3	Proneural_OPC_like_tumor	G3	Pri_Recurrence_after_TMZ	1p_19q_codeleted	CNA_Group_ 1	0.13442527192332299	-4.4650658356567299E-2	S
A_TATCCTGCATGGGAAT-1	4	KM4242_01	3	Primary	3 --> 3	Pericyte_Endothelial	Pericyte_Endothelial	Pri_Recurrence_after_TMZ	1p_19q_codeleted	CNA_Group_ 3	-5.9053620078795901E-2	2.30183280155963E-2	G2M
A_TATCGATCTATGCATA-1	1	KM4242_01	3	Primary	3 --> 3	Oligodendrocyte_like_tumor	NA	Pri_Recurrence_after_TMZ	1p_19q_codeleted	CNA_Group_ 2	8.2076114850417603E-3	-6.9360862245674407E-2	S
A_TATCGATGATTAAACG-1	0	KM4242_01	3	Primary	3 --> 3	Proneural_OPC_like_tumor	NA	Pri_Recurrence_after_TMZ	1p_19q_codeleted	CNA_Group_ 1	4.2379697567906598E-2	3.5222121639894698E-3	S
A_TATCTACAGAGGTAAT-1	0	KM4242_01	3	Primary	3 --> 3	Proneural_OPC_like_tumor	G3	Pri_Recurrence_after_TMZ	1p_19q_codeleted	CNA_Group_ 1	4.0281027855503901E-2	1.43308119172358E-2	S
A_TATCTACCACAGCGGG-1	0	KM4242_01	3	Primary	3 --> 3	Proneural_OPC_like_tumor	G3	Pri_Recurrence_after_TMZ	1p_19q_codeleted	CNA_Group_ 1	0.145732057196443	-1.64979386301231E-2	S
A_TATCTAGCCTAAAGGA-1	5	KM4242_01	3	Primary	3 --> 3	NPC_like_and_DNA_damage	G3	Pri_Recurrence_after_TMZ	1p_19q_codeleted	CNA_Group_ 1	5.9287754775241203E-2	2.9147310740880599E-2	S
A_TATGAAGACAGGTGCG-1	0	KM4242_01	3	Primary	3 --> 3	Proneural_OPC_like_tumor	G3	Pri_Recurrence_after_TMZ	1p_19q_codeleted	CNA_Group_ 3	-5.5466257523088501E-2	3.9594748777252303E-2	G2M
A_TATGCTCCCTACTTAC-1	1	KM4242_01	3	Primary	3 --> 3	Oligodendrocyte_like_tumor	NA	Pri_Recurrence_after_TMZ	1p_19q_codeleted	CNA_Group_ 3	-1.5717991610687199E-2	-4.5196935028302798E-2	G1
A_TATGGATGTGCTACGC-1	4	KM4242_01	3	Primary	3 --> 3	Pericyte_Endothelial	Pericyte_Endothelial	Pri_Recurrence_after_TMZ	1p_19q_codeleted	CNA_Group_ 1	-6.8797221881555404E-2	1.18934862812765E-2	G2M
A_TATGGCCCGGCCTCGC-1	4	KM4242_01	3	Primary	3 --> 3	Pericyte_Endothelial	Pericyte_Endothelial	Pri_Recurrence_after_TMZ	1p_19q_codeleted	CNA_Group_ 1	1.22612538860191E-2	1.7180194831027899E-2	G2M
A_TATGGGACCGAGCAGG-1	0	KM4242_01	3	Primary	3 --> 3	Proneural_OPC_like_tumor	G3	Pri_Recurrence_after_TMZ	1p_19q_codeleted	CNA_Group_ 1	1.0517287024082901E-2	6.4411266389845304E-2	G2M
A_TATGGGTACGTATCGT-1	0	KM4242_01	3	Primary	3 --> 3	Proneural_OPC_like_tumor	NA	Pri_Recurrence_after_TMZ	1p_19q_codeleted	CNA_Group_ 1	2.9601024443254902E-2	9.0722600321628405E-3	S
A_TATGGTCTGAGTAACA-1	4	KM4242_01	3	Primary	3 --> 3	Pericyte_Endothelial	Pericyte_Endothelial	Pri_Recurrence_after_TMZ	1p_19q_codeleted	CNA_Group_ 1	6.0771927100919396E-3	2.0772508012696402E-2	G2M
A_TATGTCTCATTGTGCC-1	1	KM4242_01	3	Primary	3 --> 3	Oligodendrocyte_like_tumor	NA	Pri_Recurrence_after_TMZ	1p_19q_codeleted	CNA_Group_ 2	-1.23605221458933E-2	2.77768839629783E-2	G2M
A_TATTCAATTCTAATCC-1	1	KM4242_01	3	Primary	3 --> 3	Oligodendrocyte_like_tumor	NA	Pri_Recurrence_after_TMZ	1p_19q_codeleted	CNA_Group_ 1	9.5271519206719904E-2	4.3508212583774498E-2	S
A_TATTCCACTCAGCTCG-1	0	KM4242_01	3	Primary	3 --> 3	Proneural_OPC_like_tumor	G3	Pri_Recurrence_after_TMZ	1p_19q_codeleted	CNA_Group_ 2	2.1516097442326201E-2	-1.0523184748424799E-2	S
A_TATTCCGAGCTGTTAT-1	0	KM4242_01	3	Primary	3 --> 3	Proneural_OPC_like_tumor	NA	Pri_Recurrence_after_TMZ	1p_19q_codeleted	CNA_Group_ 1	0.15977288959816	5.6692439713617697E-2	S
A_TATTCGTGCCAGAATA-1	0	KM4242_01	3	Primary	3 --> 3	Proneural_OPC_like_tumor	NA	Pri_Recurrence_after_TMZ	1p_19q_codeleted	CNA_Group_ 3	5.4401531481004697E-2	7.6357310389970796E-3	S
A_TATTTAGTCTAGATCG-1	1	KM4242_01	3	Primary	3 --> 3	Oligodendrocyte_like_tumor	NA	Pri_Recurrence_after_TMZ	1p_19q_codeleted	CNA_Group_ 2	-2.0334996792870701E-2	2.6378234451908601E-2	G2M
A_TATTTATACCGAGTAG-1	1	KM4242_01	3	Primary	3 --> 3	Oligodendrocyte_like_tumor	NA	Pri_Recurrence_after_TMZ	1p_19q_codeleted	CNA_Group_ 3	-8.6174332532476701E-3	-3.2717270343422901E-2	G1
A_TATTTGTTACCCTTTA-1	0	KM4242_01	3	Primary	3 --> 3	Proneural_OPC_like_tumor	G3	Pri_Recurrence_after_TMZ	1p_19q_codeleted	CNA_Group_ 1	2.62688161175723E-2	2.3892313794402899E-2	S
A_TCAAACAACCGCGTCG-1	1	KM4242_01	3	Primary	3 --> 3	Oligodendrocyte_like_tumor	NA	Pri_Recurrence_after_TMZ	1p_19q_codeleted	CNA_Group_ 3	6.8014342562954494E-2	-5.0174715561403099E-2	S
A_TCAAACTTAGATTGTT-1	1	KM4242_01	3	Primary	3 --> 3	Oligodendrocyte_like_tumor	NA	Pri_Recurrence_after_TMZ	1p_19q_codeleted	CNA_Group_ 1	-4.9869048570981199E-2	0.210940052980888	G2M
A_TCAAATTGTTGTGCCG-1	0	KM4242_01	3	Primary	3 --> 3	Proneural_OPC_like_tumor	G3	Pri_Recurrence_after_TMZ	1p_19q_codeleted	CNA_Group_ 1	6.0993528492268599E-2	0.13511420595992099	G2M
A_TCAAATTTGAGACTCA-1	0	KM4242_01	3	Primary	3 --> 3	Proneural_OPC_like_tumor	G3	Pri_Recurrence_after_TMZ	1p_19q_codeleted	CNA_Group_ 1	1.9217726590647601E-2	-1.5314230197855E-2	S
A_TCAACCATGTTCGGGC-1	0	KM4242_01	3	Primary	3 --> 3	Proneural_OPC_like_tumor	NA	Pri_Recurrence_after_TMZ	1p_19q_codeleted	CNA_Group_ 1	-3.06676400666397E-2	6.0573209216345904E-3	G2M
A_TCAACGAGGAGACAAA-1	0	KM4242_01	3	Primary	3 --> 3	Proneural_OPC_like_tumor	G3	Pri_Recurrence_after_TMZ	1p_19q_codeleted	CNA_Group_ 2	-2.7238978807714798E-2	1.2293801368830201E-2	G2M
A_TCAACGCGACCGGCAG-1	0	KM4242_01	3	Primary	3 --> 3	Proneural_OPC_like_tumor	G3	Pri_Recurrence_after_TMZ	1p_19q_codeleted	CNA_Group_ 1	0.102750311029551	-2.3537954478177098E-2	S
A_TCAACTAACGTATAAC-1	0	KM4242_01	3	Primary	3 --> 3	Proneural_OPC_like_tumor	G3	Pri_Recurrence_after_TMZ	1p_19q_codeleted	CNA_Group_ 3	-2.3667900099012502E-2	-3.3442366009277198E-2	G1
A_TCAATACGCCGTCATG-1	0	KM4242_01	3	Primary	3 --> 3	Proneural_OPC_like_tumor	G3	Pri_Recurrence_after_TMZ	1p_19q_codeleted	CNA_Group_ 2	-7.42153213985885E-3	-3.9714297060253798E-2	G1
A_TCACAAACCGAGGTAC-1	0	KM4242_01	3	Primary	3 --> 3	Proneural_OPC_like_tumor	NA	Pri_Recurrence_after_TMZ	1p_19q_codeleted	CNA_Group_ 1	-1.3899875335439901E-2	-2.3392317107296199E-2	G1
A_TCACAGCAAACTCGAA-1	0	KM4242_01	3	Primary	3 --> 3	Proneural_OPC_like_tumor	G3	Pri_Recurrence_after_TMZ	1p_19q_codeleted	CNA_Group_ 1	4.4648988857916898E-2	-5.3991581938204199E-2	S
A_TCACAGGAGAATAAGA-1	0	KM4242_01	3	Primary	3 --> 3	Proneural_OPC_like_tumor	G3	Pri_Recurrence_after_TMZ	1p_19q_codeleted	CNA_Group_ 1	9.4213402820771203E-2	1.6563414565174499E-2	S
A_TCACAGGGAATCGCAA-1	0	KM4242_01	3	Primary	3 --> 3	Proneural_OPC_like_tumor	NA	Pri_Recurrence_after_TMZ	1p_19q_codeleted	CNA_Group_ 1	-4.1830612992761196E-3	-8.6527499349619008E-3	G1
A_TCACAGGTTATTGGGC-1	0	KM4242_01	3	Primary	3 --> 3	Proneural_OPC_like_tumor	G3	Pri_Recurrence_after_TMZ	1p_19q_codeleted	CNA_Group_ 1	2.32105358007937E-2	8.6684633327688103E-3	S
A_TCACATCTTATCTGAT-1	0	KM4242_01	3	Primary	3 --> 3	Proneural_OPC_like_tumor	G3	Pri_Recurrence_after_TMZ	1p_19q_codeleted	CNA_Group_ 3	4.1615024313185603E-2	-5.2819789890065298E-2	S
A_TCACCCTCTTAAGATT-1	0	KM4242_01	3	Primary	3 --> 3	Proneural_OPC_like_tumor	G3	Pri_Recurrence_after_TMZ	1p_19q_codeleted	CNA_Group_ 2	-1.14092063523932E-2	3.2085415132025501E-2	G2M
A_TCACCGCTCGGCACTC-1	1	KM4242_01	3	Primary	3 --> 3	Oligodendrocyte_like_tumor	NA	Pri_Recurrence_after_TMZ	1p_19q_codeleted	CNA_Group_ 2	3.6261252731494303E-2	-2.5397877474458899E-2	S
A_TCACGCATTGTAGATC-1	0	KM4242_01	3	Primary	3 --> 3	Proneural_OPC_like_tumor	G3	Pri_Recurrence_after_TMZ	1p_19q_codeleted	CNA_Group_ 1	6.3581447514484704E-2	-3.6780678803696198E-3	S
A_TCACGGTCATCGCACA-1	0	KM4242_01	3	Primary	3 --> 3	Proneural_OPC_like_tumor	G3	Pri_Recurrence_after_TMZ	1p_19q_codeleted	CNA_Group_ 1	1.5174981626549899E-2	0.17968624948719999	G2M
A_TCACGTGCCCGATTCA-1	0	KM4242_01	3	Primary	3 --> 3	Proneural_OPC_like_tumor	G3	Pri_Recurrence_after_TMZ	1p_19q_codeleted	CNA_Group_ 1	1.19442245779359E-2	-4.1078323493943997E-2	S
A_TCAGAACGGCGGTAAT-1	0	KM4242_01	3	Primary	3 --> 3	Proneural_OPC_like_tumor	G3	Pri_Recurrence_after_TMZ	1p_19q_codeleted	CNA_Group_ 1	2.3527565108877001E-2	2.89222869629371E-2	G2M
A_TCAGACGCTATAGAAG-1	0	KM4242_01	3	Primary	3 --> 3	Proneural_OPC_like_tumor	G3	Pri_Recurrence_after_TMZ	1p_19q_codeleted	CNA_Group_ 1	5.5580029658770701E-2	-5.6772793001164503E-3	S
A_TCAGCAAATGCATCTC-1	1	KM4242_01	3	Primary	3 --> 3	Oligodendrocyte_like_tumor	NA	Pri_Recurrence_after_TMZ	1p_19q_codeleted	CNA_Group_ 3	-5.1956898148506403E-2	-1.5098451887605099E-2	G1
A_TCAGCGCACGCCGTTT-1	0	KM4242_01	3	Primary	3 --> 3	Proneural_OPC_like_tumor	G3	Pri_Recurrence_after_TMZ	1p_19q_codeleted	CNA_Group_ 1	-2.9472577466132601E-2	-2.36094642125468E-2	G1
A_TCAGGGTGTAACGTAA-1	1	KM4242_01	3	Primary	3 --> 3	Oligodendrocyte_like_tumor	NA	Pri_Recurrence_after_TMZ	1p_19q_codeleted	CNA_Group_ 3	-6.7889868954480806E-2	-6.2788443066615504E-2	G1
A_TCAGGTTCTTTGAGAA-1	0	KM4242_01	3	Primary	3 --> 3	Proneural_OPC_like_tumor	G3	Pri_Recurrence_after_TMZ	1p_19q_codeleted	CNA_Group_ 3	8.7129630411822701E-2	-5.45726119077194E-2	S
A_TCAGTACTGACCCGCG-1	0	KM4242_01	3	Primary	3 --> 3	Proneural_OPC_like_tumor	G3	Pri_Recurrence_after_TMZ	1p_19q_codeleted	CNA_Group_ 1	-2.7426698438076699E-2	-4.76997144677355E-2	G1
A_TCAGTAGGGACTATAA-1	0	KM4242_01	3	Primary	3 --> 3	Proneural_OPC_like_tumor	G3	Pri_Recurrence_after_TMZ	1p_19q_codeleted	CNA_Group_ 1	4.6717065631371603E-2	-6.7556242618775506E-2	S
A_TCATACTTACAGATCC-1	0	KM4242_01	3	Primary	3 --> 3	Proneural_OPC_like_tumor	G3	Pri_Recurrence_after_TMZ	1p_19q_codeleted	CNA_Group_ 3	-2.8708586692642001E-2	2.6162596526119498E-2	G2M
A_TCATATGAGCTTTGTT-1	0	KM4242_01	3	Primary	3 --> 3	Proneural_OPC_like_tumor	G3	Pri_Recurrence_after_TMZ	1p_19q_codeleted	CNA_Group_ 2	-8.8076964078057096E-4	-7.74431021060427E-3	G1
A_TCATCCTCAGCTGCTT-1	0	KM4242_01	3	Primary	3 --> 3	Proneural_OPC_like_tumor	G3	Pri_Recurrence_after_TMZ	1p_19q_codeleted	CNA_Group_ 1	3.9623060375685901E-2	-2.6325279074346099E-2	S
A_TCATCGACGACCGTCG-1	5	KM4242_01	3	Primary	3 --> 3	NPC_like_and_DNA_damage	G3	Pri_Recurrence_after_TMZ	1p_19q_codeleted	CNA_Group_ 1	1.8726849620311899E-2	2.6973568966113599E-2	G2M
A_TCATGCAGGTTCTCAT-1	1	KM4242_01	3	Primary	3 --> 3	Oligodendrocyte_like_tumor	NA	Pri_Recurrence_after_TMZ	1p_19q_codeleted	CNA_Group_ 2	-4.9808645181444698E-2	-2.6883939453241801E-2	G1
A_TCCAACTCAGCTATCT-1	0	KM4242_01	3	Primary	3 --> 3	Proneural_OPC_like_tumor	G3	Pri_Recurrence_after_TMZ	1p_19q_codeleted	CNA_Group_ 1	1.10430599084087E-2	-9.11237009774531E-3	S
A_TCCAACTTTAAATTCT-1	0	KM4242_01	3	Primary	3 --> 3	Proneural_OPC_like_tumor	G3	Pri_Recurrence_after_TMZ	1p_19q_codeleted	CNA_Group_ 1	-1.8870638376570398E-2	8.9801484068193198E-3	G2M
A_TCCAAGCCTAGACACA-1	0	KM4242_01	3	Primary	3 --> 3	Proneural_OPC_like_tumor	G3	Pri_Recurrence_after_TMZ	1p_19q_codeleted	CNA_Group_ 1	2.4534711899765201E-2	3.8773044205154303E-2	G2M
A_TCCACAATGGTTTACG-1	4	KM4242_01	3	Primary	3 --> 3	Pericyte_Endothelial	Pericyte_Endothelial	Pri_Recurrence_after_TMZ	1p_19q_codeleted	CNA_Group_ 3	-9.4229463077280303E-3	-2.4819652540220401E-2	G1
A_TCCACTTTATCTAGGT-1	1	KM4242_01	3	Primary	3 --> 3	Oligodendrocyte_like_tumor	NA	Pri_Recurrence_after_TMZ	1p_19q_codeleted	CNA_Group_ 3	-2.5419694848387801E-2	4.73678127445104E-2	G2M
A_TCCAGAGCACCGGTTC-1	0	KM4242_01	3	Primary	3 --> 3	Proneural_OPC_like_tumor	NA	Pri_Recurrence_after_TMZ	1p_19q_codeleted	CNA_Group_ 1	2.8192279736534501E-2	-2.81695283164052E-2	S
A_TCCAGGCGAGTACGGT-1	0	KM4242_01	3	Primary	3 --> 3	Proneural_OPC_like_tumor	NA	Pri_Recurrence_after_TMZ	1p_19q_codeleted	CNA_Group_ 1	-1.81995698565217E-2	3.0250911649955501E-2	G2M
A_TCCAGGGTATATACGA-1	0	KM4242_01	3	Primary	3 --> 3	Proneural_OPC_like_tumor	G3	Pri_Recurrence_after_TMZ	1p_19q_codeleted	CNA_Group_ 2	-3.3844562236417401E-2	1.88055137526975E-3	G2M
A_TCCCAAAGACGAAGGA-1	1	KM4242_01	3	Primary	3 --> 3	Oligodendrocyte_like_tumor	NA	Pri_Recurrence_after_TMZ	1p_19q_codeleted	CNA_Group_ 3	-2.5941488208336701E-2	5.6152727997500901E-2	G2M
A_TCCCAGCTTTAGTCTG-1	0	KM4242_01	3	Primary	3 --> 3	Proneural_OPC_like_tumor	G3	Pri_Recurrence_after_TMZ	1p_19q_codeleted	CNA_Group_ 1	-2.22400462267228E-2	2.6168679507477598E-2	G2M
A_TCCCAGGCTTAGCTAA-1	4	KM4242_01	3	Primary	3 --> 3	Pericyte_Endothelial	Pericyte_Endothelial	Pri_Recurrence_after_TMZ	1p_19q_codeleted	CNA_Group_ 3	2.3629609065944902E-2	-5.47952160998154E-2	S
A_TCCCGCGTACTCCTGG-1	1	KM4242_01	3	Primary	3 --> 3	Oligodendrocyte_like_tumor	NA	Pri_Recurrence_after_TMZ	1p_19q_codeleted	CNA_Group_ 2	-4.25199302575823E-2	-4.6166097446962102E-2	G1
A_TCCCGGGTGTGCTGCT-1	0	KM4242_01	3	Primary	3 --> 3	Proneural_OPC_like_tumor	G3	Pri_Recurrence_after_TMZ	1p_19q_codeleted	CNA_Group_ 1	-7.5542954428016503E-3	7.4114178602658398E-2	G2M
A_TCCCGTCAGTCCCGCA-1	1	KM4242_01	3	Primary	3 --> 3	Oligodendrocyte_like_tumor	NA	Pri_Recurrence_after_TMZ	1p_19q_codeleted	CNA_Group_ 3	1.1259183103610701E-2	-1.8225193472625301E-2	S
A_TCCCGTGTGCAATTTG-1	0	KM4242_01	3	Primary	3 --> 3	Proneural_OPC_like_tumor	NA	Pri_Recurrence_after_TMZ	1p_19q_codeleted	CNA_Group_ 3	9.4710693873199997E-2	-7.9887125596010706E-3	S
A_TCCCTGGCTCGCTGGA-1	0	KM4242_01	3	Primary	3 --> 3	Proneural_OPC_like_tumor	G3	Pri_Recurrence_after_TMZ	1p_19q_codeleted	CNA_Group_ 1	3.2248418225114303E-2	-4.1157333682071702E-2	S
A_TCCCTTAGATTACTCG-1	3	KM4242_01	3	Primary	3 --> 3	RBCs	RBCs	Pri_Recurrence_after_TMZ	non_tumor	CNA_Group_ 2	1.39980820606789E-2	-3.0751189297653098E-2	S
A_TCCGAACTTGGCTTAC-1	0	KM4242_01	3	Primary	3 --> 3	Proneural_OPC_like_tumor	G3	Pri_Recurrence_after_TMZ	1p_19q_codeleted	CNA_Group_ 3	-5.71103653763506E-2	-4.9524540870209702E-2	G1
A_TCCGATAATTGCCATA-1	1	KM4242_01	3	Primary	3 --> 3	Oligodendrocyte_like_tumor	NA	Pri_Recurrence_after_TMZ	1p_19q_codeleted	CNA_Group_ 2	-4.1784503822077698E-2	4.1831154631173104E-3	G2M
A_TCCGATGACTGAGCTC-1	1	KM4242_01	3	Primary	3 --> 3	Oligodendrocyte_like_tumor	NA	Pri_Recurrence_after_TMZ	1p_19q_codeleted	CNA_Group_ 2	-3.3331827493870203E-2	1.5674633295785501E-2	G2M
A_TCCGATGGTGCGACAT-1	1	KM4242_01	3	Primary	3 --> 3	Oligodendrocyte_like_tumor	NA	Pri_Recurrence_after_TMZ	1p_19q_codeleted	CNA_Group_ 3	-3.6363494583849902E-2	1.07763493633833E-2	G2M
A_TCCGATTACATTGCCG-1	0	KM4242_01	3	Primary	3 --> 3	Proneural_OPC_like_tumor	G3	Pri_Recurrence_after_TMZ	1p_19q_codeleted	CNA_Group_ 1	1.69964074441726E-2	6.6265958479890799E-3	S
A_TCCGCCTGTCTACAAG-1	0	KM4242_01	3	Primary	3 --> 3	Proneural_OPC_like_tumor	G3	Pri_Recurrence_after_TMZ	1p_19q_codeleted	CNA_Group_ 1	2.9504821508292499E-2	-2.6046212852799799E-2	S
A_TCCGCGGCAGCATCTG-1	1	KM4242_01	3	Primary	3 --> 3	Oligodendrocyte_like_tumor	NA	Pri_Recurrence_after_TMZ	1p_19q_codeleted	CNA_Group_ 3	-2.4671772364108599E-2	7.1682220148848397E-2	G2M
A_TCCGCTGTCATCCCGG-1	0	KM4242_01	3	Primary	3 --> 3	Proneural_OPC_like_tumor	NA	Pri_Recurrence_after_TMZ	1p_19q_codeleted	CNA_Group_ 1	2.3858448896922999E-2	-2.18083555501596E-2	S
A_TCCGCTTATCCCATTA-1	0	KM4242_01	3	Primary	3 --> 3	Proneural_OPC_like_tumor	G3	Pri_Recurrence_after_TMZ	1p_19q_codeleted	CNA_Group_ 1	5.7018697322437299E-2	-1.9965635619568E-2	S
A_TCCGGTTCGTCCGGTC-1	0	KM4242_01	3	Primary	3 --> 3	Proneural_OPC_like_tumor	G3	Pri_Recurrence_after_TMZ	1p_19q_codeleted	CNA_Group_ 1	4.5208545373707699E-2	2.0702524355097899E-2	S
A_TCCGTTTAGCCTTGAA-1	1	KM4242_01	3	Primary	3 --> 3	Oligodendrocyte_like_tumor	NA	Pri_Recurrence_after_TMZ	1p_19q_codeleted	CNA_Group_ 2	4.6255992955896198E-2	-4.3048287359245402E-3	S
A_TCCTAAAGATTCAGAC-1	0	KM4242_01	3	Primary	3 --> 3	Proneural_OPC_like_tumor	G3	Pri_Recurrence_after_TMZ	1p_19q_codeleted	CNA_Group_ 1	4.7172589755691604E-3	-6.4317498473740298E-2	S
A_TCCTAAATTGGGAAGC-1	0	KM4242_01	3	Primary	3 --> 3	Proneural_OPC_like_tumor	G3	Pri_Recurrence_after_TMZ	1p_19q_codeleted	CNA_Group_ 2	-2.4615912458994901E-2	2.3157435462421699E-3	G2M
A_TCCTACATCCACGGCC-1	1	KM4242_01	3	Primary	3 --> 3	Oligodendrocyte_like_tumor	NA	Pri_Recurrence_after_TMZ	1p_19q_codeleted	CNA_Group_ 1	2.5995468289438699E-2	-4.2883860953457802E-2	S
A_TCCTAGCAAAGAAGCT-1	0	KM4242_01	3	Primary	3 --> 3	Proneural_OPC_like_tumor	G3	Pri_Recurrence_after_TMZ	1p_19q_codeleted	CNA_Group_ 1	6.7253589031648103E-2	-2.8610053859900099E-2	S
A_TCCTCGGGCTGGGCTT-1	0	KM4242_01	3	Primary	3 --> 3	Proneural_OPC_like_tumor	NA	Pri_Recurrence_after_TMZ	1p_19q_codeleted	CNA_Group_ 1	3.1317013303703803E-2	-1.2894286567349899E-2	S
A_TCCTCTACGAGATGGC-1	0	KM4242_01	3	Primary	3 --> 3	Proneural_OPC_like_tumor	G3	Pri_Recurrence_after_TMZ	1p_19q_codeleted	CNA_Group_ 1	0.172115922354354	0.11112664318144599	S
A_TCCTCTCCAGTTGTCC-1	0	KM4242_01	3	Primary	3 --> 3	Proneural_OPC_like_tumor	G3	Pri_Recurrence_after_TMZ	1p_19q_codeleted	CNA_Group_ 3	6.1385982187120401E-2	-5.17215837316905E-3	S
A_TCCTGCGTTGATACTC-1	4	KM4242_01	3	Primary	3 --> 3	Pericyte_Endothelial	Pericyte_Endothelial	Pri_Recurrence_after_TMZ	1p_19q_codeleted	CNA_Group_ 1	-1.5884334836165699E-2	7.9206252204397608E-3	G2M
A_TCCTTCAGTGGTCGAA-1	1	KM4242_01	3	Primary	3 --> 3	Oligodendrocyte_like_tumor	NA	Pri_Recurrence_after_TMZ	1p_19q_codeleted	CNA_Group_ 3	-1.52130571018238E-2	-6.0658666343907798E-2	G1
A_TCCTTTCTTACGCTTA-1	0	KM4242_01	3	Primary	3 --> 3	Proneural_OPC_like_tumor	NA	Pri_Recurrence_after_TMZ	1p_19q_codeleted	CNA_Group_ 3	7.3071229532444297E-3	-2.0812395114331299E-2	S
A_TCGAAATTTAGGACCA-1	0	KM4242_01	3	Primary	3 --> 3	Proneural_OPC_like_tumor	G3	Pri_Recurrence_after_TMZ	1p_19q_codeleted	CNA_Group_ 1	-9.1141871876073005E-3	4.58903407313399E-2	G2M
A_TCGAGACCAACACCGT-1	0	KM4242_01	3	Primary	3 --> 3	Proneural_OPC_like_tumor	G3	Pri_Recurrence_after_TMZ	1p_19q_codeleted	CNA_Group_ 3	2.37885128451952E-2	8.7357481831840597E-2	G2M
A_TCGCAAAGATGCATTT-1	6	KM4242_01	3	Primary	3 --> 3	IEG	G3	Pri_Recurrence_after_TMZ	1p_19q_codeleted	CNA_Group_ 1	4.2840501201820098E-2	5.1901419337230205E-4	S
A_TCGCACCAGGAGGCAG-1	6	KM4242_01	3	Primary	3 --> 3	IEG	NA	Pri_Recurrence_after_TMZ	1p_19q_codeleted	CNA_Group_ 1	7.3519177537228295E-2	7.0659349684293604E-2	S
A_TCGCCGAAGTTGCGTC-1	0	KM4242_01	3	Primary	3 --> 3	Proneural_OPC_like_tumor	G3	Pri_Recurrence_after_TMZ	1p_19q_codeleted	CNA_Group_ 1	-5.2903484518568899E-3	-5.48413739780046E-2	G1
A_TCGCCGACATATTCGC-1	0	KM4242_01	3	Primary	3 --> 3	Proneural_OPC_like_tumor	G3	Pri_Recurrence_after_TMZ	1p_19q_codeleted	CNA_Group_ 1	9.7689246640395494E-2	9.2523624391035505E-3	S
A_TCGCCGGTCGATCCGT-1	1	KM4242_01	3	Primary	3 --> 3	Oligodendrocyte_like_tumor	NA	Pri_Recurrence_after_TMZ	1p_19q_codeleted	CNA_Group_ 3	-5.3819061183825803E-3	-1.6519846291367501E-2	G1
A_TCGCGTCCAGAAGGTC-1	0	KM4242_01	3	Primary	3 --> 3	Proneural_OPC_like_tumor	G3	Pri_Recurrence_after_TMZ	1p_19q_codeleted	CNA_Group_ 3	5.3281217317308401E-2	-4.7305284881229998E-3	S
A_TCGCTAAACCGCTATC-1	1	KM4242_01	3	Primary	3 --> 3	Oligodendrocyte_like_tumor	NA	Pri_Recurrence_after_TMZ	1p_19q_codeleted	CNA_Group_ 2	-7.4976937454934403E-2	4.5597890524408699E-2	G2M
A_TCGCTACTGGCTTTGA-1	0	KM4242_01	3	Primary	3 --> 3	Proneural_OPC_like_tumor	G3	Pri_Recurrence_after_TMZ	1p_19q_codeleted	CNA_Group_ 2	-3.0202438264594001E-2	1.4629140974392E-2	G2M
A_TCGCTCGATATATTCC-1	0	KM4242_01	3	Primary	3 --> 3	Proneural_OPC_like_tumor	NA	Pri_Recurrence_after_TMZ	1p_19q_codeleted	CNA_Group_ 3	6.3586702012319196E-2	2.8566570719320301E-3	S
A_TCGCTGCCAATGCTGT-1	4	KM4242_01	3	Primary	3 --> 3	Pericyte_Endothelial	Pericyte_Endothelial	Pri_Recurrence_after_TMZ	1p_19q_codeleted	CNA_Group_ 1	-1.3330187133957999E-2	2.4284441609660899E-2	G2M
A_TCGCTGGGCGGATTGT-1	1	KM4242_01	3	Primary	3 --> 3	Oligodendrocyte_like_tumor	NA	Pri_Recurrence_after_TMZ	1p_19q_codeleted	CNA_Group_ 2	-2.1660124226862199E-2	3.9489452653163502E-3	G2M
A_TCGCTGTGCGTAAATC-1	4	KM4242_01	3	Primary	3 --> 3	Pericyte_Endothelial	Pericyte_Endothelial	Pri_Recurrence_after_TMZ	1p_19q_codeleted	CNA_Group_ 1	3.2011074368967198E-2	-5.2719922366577597E-2	S
A_TCGCTTTAAACGTTTG-1	1	KM4242_01	3	Primary	3 --> 3	Oligodendrocyte_like_tumor	NA	Pri_Recurrence_after_TMZ	1p_19q_codeleted	CNA_Group_ 3	2.6820979697031598E-3	-2.7078962881660801E-2	S
A_TCGGAATGCGCTCTGA-1	0	KM4242_01	3	Primary	3 --> 3	Proneural_OPC_like_tumor	G3	Pri_Recurrence_after_TMZ	1p_19q_codeleted	CNA_Group_ 3	-2.3845458056307701E-2	9.9326571206126302E-3	G2M
A_TCGGACGCCCAGCCCA-1	1	KM4242_01	3	Primary	3 --> 3	Oligodendrocyte_like_tumor	NA	Pri_Recurrence_after_TMZ	1p_19q_codeleted	CNA_Group_ 3	-3.3239664835888597E-2	-4.7001376067487201E-2	G1
A_TCGGAGTACATGAGTA-1	1	KM4242_01	3	Primary	3 --> 3	Oligodendrocyte_like_tumor	NA	Pri_Recurrence_after_TMZ	1p_19q_codeleted	CNA_Group_ 3	-4.1139714872264699E-2	-1.8742036184482901E-2	G1
A_TCGGGAGACAGCGTAC-1	0	KM4242_01	3	Primary	3 --> 3	Proneural_OPC_like_tumor	G3	Pri_Recurrence_after_TMZ	1p_19q_codeleted	CNA_Group_ 2	-3.79384198251164E-2	-1.8840758744521499E-2	G1
A_TCGGGATTCAAACATA-1	0	KM4242_01	3	Primary	3 --> 3	Proneural_OPC_like_tumor	G3	Pri_Recurrence_after_TMZ	1p_19q_codeleted	CNA_Group_ 1	2.6563199224004901E-2	-7.2941201941509298E-2	S
A_TCGGGCCGTCGTGGTA-1	1	KM4242_01	3	Primary	3 --> 3	Oligodendrocyte_like_tumor	NA	Pri_Recurrence_after_TMZ	1p_19q_codeleted	CNA_Group_ 2	-2.2740307585332499E-2	-1.54571094677525E-2	G1
A_TCGTAAGACGACATTG-1	1	KM4242_01	3	Primary	3 --> 3	Oligodendrocyte_like_tumor	NA	Pri_Recurrence_after_TMZ	1p_19q_codeleted	CNA_Group_ 3	-6.5155452212785597E-2	1.3336138899038801E-2	G2M
A_TCGTATTACCCATTGC-1	5	KM4242_01	3	Primary	3 --> 3	NPC_like_and_DNA_damage	G3	Pri_Recurrence_after_TMZ	non_tumor	CNA_Group_ 1	8.3314628150979696E-3	-3.4650249275850899E-2	S
A_TCGTCACACTGTTAGC-1	0	KM4242_01	3	Primary	3 --> 3	Proneural_OPC_like_tumor	G3	Pri_Recurrence_after_TMZ	1p_19q_codeleted	CNA_Group_ 3	-4.1483323007471297E-3	-2.5193911130176602E-2	G1
A_TCGTCCGCTGGCGTCT-1	0	KM4242_01	3	Primary	3 --> 3	Proneural_OPC_like_tumor	G3	Pri_Recurrence_after_TMZ	1p_19q_codeleted	CNA_Group_ 3	3.0004753072736499E-2	-2.1279612984042399E-3	S
A_TCGTCTTAGGCGTTAA-1	0	KM4242_01	3	Primary	3 --> 3	Proneural_OPC_like_tumor	NA	Pri_Recurrence_after_TMZ	1p_19q_codeleted	CNA_Group_ 1	-5.4199157984319802E-3	-7.6334643350351297E-2	G1
A_TCGTGTACTATGGATG-1	0	KM4242_01	3	Primary	3 --> 3	Proneural_OPC_like_tumor	NA	Pri_Recurrence_after_TMZ	1p_19q_codeleted	CNA_Group_ 1	-6.1934330783855497E-3	3.7686154308580001E-2	G2M
A_TCGTTAGGAGTCCCTA-1	0	KM4242_01	3	Primary	3 --> 3	Proneural_OPC_like_tumor	G3	Pri_Recurrence_after_TMZ	1p_19q_codeleted	CNA_Group_ 2	-6.5462746188956903E-3	-4.7008341607415197E-2	G1
A_TCGTTGCTATCCGGTC-1	0	KM4242_01	3	Primary	3 --> 3	Proneural_OPC_like_tumor	G3	Pri_Recurrence_after_TMZ	1p_19q_codeleted	CNA_Group_ 1	-2.8162807985245299E-3	-2.41473882891272E-2	G1
A_TCTACCGTCCACAAGC-1	1	KM4242_01	3	Primary	3 --> 3	Oligodendrocyte_like_tumor	NA	Pri_Recurrence_after_TMZ	1p_19q_codeleted	CNA_Group_ 2	-4.4789227703320798E-2	1.6753506427751499E-2	G2M
A_TCTAGCAATCTCCGCC-1	0	KM4242_01	3	Primary	3 --> 3	Proneural_OPC_like_tumor	G3	Pri_Recurrence_after_TMZ	1p_19q_codeleted	CNA_Group_ 1	-3.1319504603573398E-2	-4.6473795439692898E-2	G1
A_TCTAGCATCTTCGATG-1	0	KM4242_01	3	Primary	3 --> 3	Proneural_OPC_like_tumor	G3	Pri_Recurrence_after_TMZ	1p_19q_codeleted	CNA_Group_ 1	1.72969675226048E-2	-1.0799984832040499E-2	S
A_TCTAGCATGCCCAGAA-1	0	KM4242_01	3	Primary	3 --> 3	Proneural_OPC_like_tumor	G3	Pri_Recurrence_after_TMZ	1p_19q_codeleted	CNA_Group_ 1	3.5747915143339401E-2	3.1542478402572703E-2	S
A_TCTAGTTATCAGAAGA-1	0	KM4242_01	3	Primary	3 --> 3	Proneural_OPC_like_tumor	G3	Pri_Recurrence_after_TMZ	1p_19q_codeleted	CNA_Group_ 3	-1.4626522360713099E-2	-2.7058481435214801E-2	G1
A_TCTATCATGCAGTTAC-1	2	KM4242_01	3	Primary	3 --> 3	NPC_like_tumor	Neurons	Pri_Recurrence_after_TMZ	non_tumor	NA	-2.7729969223156601E-2	-3.5050118042732101E-2	G1
A_TCTATCGGTCGCAACA-1	1	KM4242_01	3	Primary	3 --> 3	Oligodendrocyte_like_tumor	NA	Pri_Recurrence_after_TMZ	1p_19q_codeleted	CNA_Group_ 3	-2.98952716006399E-2	-8.1966399952046604E-3	G1
A_TCTCAAATCAATCGGG-1	0	KM4242_01	3	Primary	3 --> 3	Proneural_OPC_like_tumor	G3	Pri_Recurrence_after_TMZ	1p_19q_codeleted	CNA_Group_ 1	7.4650373553460506E-2	-7.1099611437385302E-2	S
A_TCTCATGAGATAGGGT-1	0	KM4242_01	3	Primary	3 --> 3	Proneural_OPC_like_tumor	NA	Pri_Recurrence_after_TMZ	1p_19q_codeleted	CNA_Group_ 1	1.8420041611378501E-2	1.5458317321201301E-2	S
A_TCTCCAACGTAGGTTA-1	1	KM4242_01	3	Primary	3 --> 3	Oligodendrocyte_like_tumor	NA	Pri_Recurrence_after_TMZ	1p_19q_codeleted	CNA_Group_ 2	-8.0881293007966995E-3	-3.6815749953272497E-2	G1
A_TCTCCCTGGGCAGCGT-1	6	KM4242_01	3	Primary	3 --> 3	IEG	G3	Pri_Recurrence_after_TMZ	1p_19q_codeleted	CNA_Group_ 1	5.5454070682322998E-2	7.3887871665594504E-2	G2M
A_TCTCTAATAGCTGGTA-1	1	KM4242_01	3	Primary	3 --> 3	Oligodendrocyte_like_tumor	NA	Pri_Recurrence_after_TMZ	1p_19q_codeleted	CNA_Group_ 3	-1.2522956993268899E-2	3.3236280524094899E-3	G2M
A_TCTGAACCGGTCGGCT-1	0	KM4242_01	3	Primary	3 --> 3	Proneural_OPC_like_tumor	G3	Pri_Recurrence_after_TMZ	1p_19q_codeleted	CNA_Group_ 1	1.9235692319506E-2	-8.6083496187741599E-3	S
A_TCTGAAGCACGTGGTC-1	6	KM4242_01	3	Primary	3 --> 3	IEG	G3	Pri_Recurrence_after_TMZ	1p_19q_codeleted	CNA_Group_ 1	-1.90715708024344E-3	-1.1842104865257001E-2	G1
A_TCTGAATTCCGTACAA-1	1	KM4242_01	3	Primary	3 --> 3	Oligodendrocyte_like_tumor	NA	Pri_Recurrence_after_TMZ	1p_19q_codeleted	CNA_Group_ 2	-2.32760202414307E-2	-3.4000405825597803E-2	G1
A_TCTGATGTATTCTGTC-1	0	KM4242_01	3	Primary	3 --> 3	Proneural_OPC_like_tumor	NA	Pri_Recurrence_after_TMZ	1p_19q_codeleted	CNA_Group_ 1	-1.76610918969002E-2	-9.8270137129853607E-3	G1
A_TCTGCATACCTTGCTT-1	0	KM4242_01	3	Primary	3 --> 3	Proneural_OPC_like_tumor	NA	Pri_Recurrence_after_TMZ	1p_19q_codeleted	CNA_Group_ 1	-1.7022532222631299E-2	-3.4825056150993301E-2	G1
A_TCTGCCAGAAACTGCA-1	1	KM4242_01	3	Primary	3 --> 3	Oligodendrocyte_like_tumor	NA	Pri_Recurrence_after_TMZ	1p_19q_codeleted	CNA_Group_ 3	-1.44587434020442E-2	-1.23311247795029E-3	G1
A_TCTGGGTAGCGCTCAT-1	0	KM4242_01	3	Primary	3 --> 3	Proneural_OPC_like_tumor	G3	Pri_Recurrence_after_TMZ	1p_19q_codeleted	CNA_Group_ 1	2.6489133268424399E-2	-7.2758491864776204E-2	S
A_TCTGTGCCATCATAGT-1	1	KM4242_01	3	Primary	3 --> 3	Oligodendrocyte_like_tumor	NA	Pri_Recurrence_after_TMZ	1p_19q_codeleted	CNA_Group_ 3	2.2751760580069901E-2	-1.4402329747013E-2	S
A_TCTTACAGAGGTACCG-1	1	KM4242_01	3	Primary	3 --> 3	Oligodendrocyte_like_tumor	NA	Pri_Recurrence_after_TMZ	1p_19q_codeleted	CNA_Group_ 3	-9.3987076499107997E-3	1.9271654300139301E-2	G2M
A_TCTTACCGGAACTCGT-1	1	KM4242_01	3	Primary	3 --> 3	Oligodendrocyte_like_tumor	NA	Pri_Recurrence_after_TMZ	1p_19q_codeleted	CNA_Group_ 3	3.56931920027624E-2	1.36292551954249E-3	S
A_TCTTACGGCATCCGAC-1	0	KM4242_01	3	Primary	3 --> 3	Proneural_OPC_like_tumor	G3	Pri_Recurrence_after_TMZ	1p_19q_codeleted	CNA_Group_ 3	5.4423267707718999E-2	6.4159455053116902E-3	S
A_TCTTCGAATAGACGTT-1	0	KM4242_01	3	Primary	3 --> 3	Proneural_OPC_like_tumor	NA	Pri_Recurrence_after_TMZ	1p_19q_codeleted	CNA_Group_ 1	1.7598969489955499E-2	-2.7837385322191901E-2	S
A_TCTTCGATACCAATAA-1	1	KM4242_01	3	Primary	3 --> 3	Oligodendrocyte_like_tumor	NA	Pri_Recurrence_after_TMZ	1p_19q_codeleted	CNA_Group_ 1	0.11514030152041101	-1.2511441842494701E-2	S
A_TCTTGATGCGTAGCGA-1	1	KM4242_01	3	Primary	3 --> 3	Oligodendrocyte_like_tumor	NA	Pri_Recurrence_after_TMZ	1p_19q_codeleted	CNA_Group_ 1	-2.73801558720034E-2	-9.0483338469244303E-3	G1
A_TCTTGCTCCCGATACT-1	0	KM4242_01	3	Primary	3 --> 3	Proneural_OPC_like_tumor	G3	Pri_Recurrence_after_TMZ	1p_19q_codeleted	CNA_Group_ 2	-4.1897805138468198E-2	-3.5443316474765701E-2	G1
A_TCTTGGTAACACCAAA-1	1	KM4242_01	3	Primary	3 --> 3	Oligodendrocyte_like_tumor	NA	Pri_Recurrence_after_TMZ	1p_19q_codeleted	CNA_Group_ 3	-4.7603634692660303E-2	-1.8995329339632199E-2	G1
A_TGAAAGGACCTGACTC-1	1	KM4242_01	3	Primary	3 --> 3	Oligodendrocyte_like_tumor	NA	Pri_Recurrence_after_TMZ	1p_19q_codeleted	CNA_Group_ 3	5.2696266986246097E-2	7.4456392269268701E-3	S
A_TGAATACCGACGCGTA-1	0	KM4242_01	3	Primary	3 --> 3	Proneural_OPC_like_tumor	G3	Pri_Recurrence_after_TMZ	1p_19q_codeleted	CNA_Group_ 1	5.48978298646359E-2	-3.5214418469151597E-2	S
A_TGACCAAATCTTAAAC-1	0	KM4242_01	3	Primary	3 --> 3	Proneural_OPC_like_tumor	G3	Pri_Recurrence_after_TMZ	1p_19q_codeleted	CNA_Group_ 1	1.7442100279623E-2	-3.2126096927484103E-2	S
A_TGACCCACGTTAGACA-1	0	KM4242_01	3	Primary	3 --> 3	Proneural_OPC_like_tumor	G3	Pri_Recurrence_after_TMZ	1p_19q_codeleted	CNA_Group_ 2	-4.9105410109010802E-2	-1.51261471977268E-2	G1
A_TGACTATAATCCTTTC-1	0	KM4242_01	3	Primary	3 --> 3	Proneural_OPC_like_tumor	G3	Pri_Recurrence_after_TMZ	1p_19q_codeleted	CNA_Group_ 2	8.1952524300637306E-2	-3.3408016899212099E-2	S
A_TGAGAATGCTTTACCG-1	1	KM4242_01	3	Primary	3 --> 3	Oligodendrocyte_like_tumor	NA	Pri_Recurrence_after_TMZ	1p_19q_codeleted	CNA_Group_ 3	-2.4422327056126E-2	-6.4393041354553898E-3	G1
A_TGAGAGATTTACCACG-1	1	KM4242_01	3	Primary	3 --> 3	Oligodendrocyte_like_tumor	NA	Pri_Recurrence_after_TMZ	1p_19q_codeleted	CNA_Group_ 2	-2.1111227072803E-2	-3.0352327354792999E-2	G1
A_TGAGCCATACAGTCTC-1	0	KM4242_01	3	Primary	3 --> 3	Proneural_OPC_like_tumor	G3	Pri_Recurrence_after_TMZ	1p_19q_codeleted	CNA_Group_ 1	5.04714106159177E-2	-2.41528182518485E-2	S
A_TGAGCGGAAAGTGTTC-1	0	KM4242_01	3	Primary	3 --> 3	Proneural_OPC_like_tumor	G3	Pri_Recurrence_after_TMZ	NA	NA	6.1107835210125298E-2	-2.9281272295559199E-2	S
A_TGAGCTTTAATGACGC-1	1	KM4242_01	3	Primary	3 --> 3	Oligodendrocyte_like_tumor	NA	Pri_Recurrence_after_TMZ	1p_19q_codeleted	CNA_Group_ 3	-2.99252005255424E-2	-2.1765430202721401E-2	G1
A_TGAGGAGTGCCAGCTT-1	3	KM4242_01	3	Primary	3 --> 3	RBCs	RBCs	Pri_Recurrence_after_TMZ	1p_19q_codeleted	CNA_Group_ 2	5.3749304599238802E-2	-1.24359967148429E-2	S
A_TGAGTAAATTAGCGTA-1	0	KM4242_01	3	Primary	3 --> 3	Proneural_OPC_like_tumor	G3	Pri_Recurrence_after_TMZ	1p_19q_codeleted	CNA_Group_ 2	5.2374816804903898E-2	-2.0659673519523501E-2	S
A_TGAGTGCCTCTTAAAT-1	0	KM4242_01	3	Primary	3 --> 3	Proneural_OPC_like_tumor	G3	Pri_Recurrence_after_TMZ	1p_19q_codeleted	CNA_Group_ 1	3.2040999673267601E-4	-3.4311038420815898E-2	S
A_TGAGTGGTCCGTGACG-1	1	KM4242_01	3	Primary	3 --> 3	Oligodendrocyte_like_tumor	NA	Pri_Recurrence_after_TMZ	1p_19q_codeleted	CNA_Group_ 3	0.13727178681800301	-1.8850344647058599E-2	S
A_TGATCAGGGAACTGCT-1	0	KM4242_01	3	Primary	3 --> 3	Proneural_OPC_like_tumor	G3	Pri_Recurrence_after_TMZ	1p_19q_codeleted	CNA_Group_ 1	-3.5639816913116198E-2	-3.6525579806214903E-2	G1
A_TGATCGGTTTGACCCT-1	4	KM4242_01	3	Primary	3 --> 3	Pericyte_Endothelial	Pericyte_Endothelial	Pri_Recurrence_after_TMZ	1p_19q_codeleted	CNA_Group_ 1	5.5020485454436399E-2	3.8902985219056302E-2	S
A_TGATCTCCGGCGCCAG-1	4	KM4242_01	3	Primary	3 --> 3	Pericyte_Endothelial	Pericyte_Endothelial	Pri_Recurrence_after_TMZ	1p_19q_codeleted	CNA_Group_ 3	9.9942757149940997E-2	3.64866091627137E-2	S
A_TGATTCGTCTATCACT-1	0	KM4242_01	3	Primary	3 --> 3	Proneural_OPC_like_tumor	G3	Pri_Recurrence_after_TMZ	1p_19q_codeleted	CNA_Group_ 1	3.05048163616993E-2	-7.5454845377179404E-3	S
A_TGATTCTGTCGCCGGT-1	0	KM4242_01	3	Primary	3 --> 3	Proneural_OPC_like_tumor	G3	Pri_Recurrence_after_TMZ	1p_19q_codeleted	CNA_Group_ 1	1.8728800731499198E-2	-7.6131855920899799E-2	S
A_TGATTTATTAGCTGTG-1	5	KM4242_01	3	Primary	3 --> 3	NPC_like_and_DNA_damage	G3	Pri_Recurrence_after_TMZ	1p_19q_codeleted	CNA_Group_ 1	-4.3293366373136202E-2	-7.1366365632905299E-2	G1
A_TGCAACCCATCTGCGG-1	0	KM4242_01	3	Primary	3 --> 3	Proneural_OPC_like_tumor	G3	Pri_Recurrence_after_TMZ	1p_19q_codeleted	CNA_Group_ 1	-1.9308801964561501E-2	-4.3206096017276603E-3	G1
A_TGCAACTACTGGTTGA-1	0	KM4242_01	3	Primary	3 --> 3	Proneural_OPC_like_tumor	G3	Pri_Recurrence_after_TMZ	1p_19q_codeleted	CNA_Group_ 1	3.8190326941678599E-3	1.18075199353729E-2	G2M
A_TGCAAGAATGACGTAA-1	1	KM4242_01	3	Primary	3 --> 3	Oligodendrocyte_like_tumor	NA	Pri_Recurrence_after_TMZ	1p_19q_codeleted	CNA_Group_ 1	-9.7777264601967093E-3	1.82114865350518E-3	G2M
A_TGCAATCTAACACGGT-1	0	KM4242_01	3	Primary	3 --> 3	Proneural_OPC_like_tumor	G3	Pri_Recurrence_after_TMZ	1p_19q_codeleted	CNA_Group_ 1	3.1659992200084801E-2	-2.199753114324E-2	S
A_TGCAGAACTATATCGT-1	0	KM4242_01	3	Primary	3 --> 3	Proneural_OPC_like_tumor	G3	Pri_Recurrence_after_TMZ	1p_19q_codeleted	CNA_Group_ 1	-9.5116715745160996E-4	1.18616740050478E-2	G2M
A_TGCAGAGTACCGAGCA-1	0	KM4242_01	3	Primary	3 --> 3	Proneural_OPC_like_tumor	G3	Pri_Recurrence_after_TMZ	1p_19q_codeleted	CNA_Group_ 2	-4.3056260390951999E-2	-2.30523861364587E-4	G1
A_TGCAGGATCGGCAAAG-1	4	KM4242_01	3	Primary	3 --> 3	Pericyte_Endothelial	Pericyte_Endothelial	Pri_Recurrence_after_TMZ	1p_19q_codeleted	CNA_Group_ 3	-3.75048458827777E-2	2.4026074705847899E-2	G2M
A_TGCAGTTTCCTCCCAT-1	1	KM4242_01	3	Primary	3 --> 3	Oligodendrocyte_like_tumor	NA	Pri_Recurrence_after_TMZ	1p_19q_codeleted	CNA_Group_ 1	-2.7895803226366301E-2	-7.1719991632109806E-2	G1
A_TGCATATGTCTGTCAC-1	1	KM4242_01	3	Primary	3 --> 3	Oligodendrocyte_like_tumor	NA	Pri_Recurrence_after_TMZ	1p_19q_codeleted	CNA_Group_ 2	-8.2220059659144397E-3	-1.77036523848253E-2	G1
A_TGCATGGATCGGATCT-1	1	KM4242_01	3	Primary	3 --> 3	Oligodendrocyte_like_tumor	NA	Pri_Recurrence_after_TMZ	1p_19q_codeleted	CNA_Group_ 3	-1.03717656380814E-2	-4.8294932916839199E-3	G1
A_TGCATGTGGTAATCTA-1	1	KM4242_01	3	Primary	3 --> 3	Oligodendrocyte_like_tumor	NA	Pri_Recurrence_after_TMZ	1p_19q_codeleted	CNA_Group_ 3	2.42226134510789E-2	-2.4546315232904702E-2	S
A_TGCCAATGGGTACTCT-1	0	KM4242_01	3	Primary	3 --> 3	Proneural_OPC_like_tumor	G3	Pri_Recurrence_after_TMZ	1p_19q_codeleted	CNA_Group_ 2	-1.7177024570651501E-2	-3.9754320089354499E-2	G1
A_TGCCACCTGGCGAAAC-1	1	KM4242_01	3	Primary	3 --> 3	Oligodendrocyte_like_tumor	NA	Pri_Recurrence_after_TMZ	1p_19q_codeleted	CNA_Group_ 2	1.4565921263661E-2	5.7489250928942897E-3	S
A_TGCCAGTACGTGGAGA-1	0	KM4242_01	3	Primary	3 --> 3	Proneural_OPC_like_tumor	G3	Pri_Recurrence_after_TMZ	1p_19q_codeleted	CNA_Group_ 1	1.69919796513162E-2	7.8912443468448501E-2	G2M
A_TGCCATTACTAAAGAA-1	1	KM4242_01	3	Primary	3 --> 3	Oligodendrocyte_like_tumor	NA	Pri_Recurrence_after_TMZ	1p_19q_codeleted	CNA_Group_ 2	-4.3505388337568202E-2	-5.64636335798731E-2	G1
A_TGCCCGTACCGTTAAA-1	0	KM4242_01	3	Primary	3 --> 3	Proneural_OPC_like_tumor	NA	Pri_Recurrence_after_TMZ	1p_19q_codeleted	CNA_Group_ 1	9.1637834671940602E-2	1.42010109392265E-3	S
A_TGCCGTGGATCGTCCT-1	0	KM4242_01	3	Primary	3 --> 3	Proneural_OPC_like_tumor	G3	Pri_Recurrence_after_TMZ	1p_19q_codeleted	CNA_Group_ 4	-6.7353290365704697E-3	2.8836659738785599E-2	G2M
A_TGCCTGATCAAACGAT-1	1	KM4242_01	3	Primary	3 --> 3	Oligodendrocyte_like_tumor	NA	Pri_Recurrence_after_TMZ	1p_19q_codeleted	CNA_Group_ 3	-6.7567847846624507E-2	-3.6419869775463201E-2	G1
A_TGCCTTGGCCAGGCAA-1	6	KM4242_01	3	Primary	3 --> 3	IEG	NA	Pri_Recurrence_after_TMZ	1p_19q_codeleted	CNA_Group_ 1	5.9927301726448598E-2	-5.1261695159438202E-2	S
A_TGCGACACCCTAGTGC-1	2	KM4242_01	3	Primary	3 --> 3	NPC_like_tumor	G3	Pri_Recurrence_after_TMZ	non_tumor	NA	8.4431480702306605E-2	-1.6819866875796299E-2	S
A_TGCGAGAATATTACCC-1	0	KM4242_01	3	Primary	3 --> 3	Proneural_OPC_like_tumor	G3	Pri_Recurrence_after_TMZ	1p_19q_codeleted	CNA_Group_ 1	-4.7796802102659398E-3	-5.8697930613410901E-2	G1
A_TGCGCAAAGCATTTGG-1	0	KM4242_01	3	Primary	3 --> 3	Proneural_OPC_like_tumor	NA	Pri_Recurrence_after_TMZ	1p_19q_codeleted	CNA_Group_ 1	2.9552818462513099E-2	-2.58337450163953E-2	S
A_TGCGCGATTAACGGAG-1	0	KM4242_01	3	Primary	3 --> 3	Proneural_OPC_like_tumor	G3	Pri_Recurrence_after_TMZ	1p_19q_codeleted	CNA_Group_ 1	-1.29911939176823E-2	4.1804995835613402E-4	G2M
A_TGCGGACTTGACTCCG-1	0	KM4242_01	3	Primary	3 --> 3	Proneural_OPC_like_tumor	G3	Pri_Recurrence_after_TMZ	1p_19q_codeleted	CNA_Group_ 1	3.2384963499232998E-2	6.2053687954494001E-2	G2M
A_TGCGGAGTAAAGGTGC-1	1	KM4242_01	3	Primary	3 --> 3	Oligodendrocyte_like_tumor	NA	Pri_Recurrence_after_TMZ	1p_19q_codeleted	CNA_Group_ 3	-3.95844786017936E-2	-1.5388823691224201E-2	G1
A_TGCGTAAGAACCTGAT-1	0	KM4242_01	3	Primary	3 --> 3	Proneural_OPC_like_tumor	G3	Pri_Recurrence_after_TMZ	1p_19q_codeleted	CNA_Group_ 1	-1.34040254080604E-2	-8.4215254381877006E-2	G1
A_TGCGTTTGTTGACACT-1	0	KM4242_01	3	Primary	3 --> 3	Proneural_OPC_like_tumor	NA	Pri_Recurrence_after_TMZ	1p_19q_codeleted	CNA_Group_ 1	5.9837083836153902E-2	-2.66589555179143E-3	S
A_TGCTCGGCGAAACCCA-1	0	KM4242_01	3	Primary	3 --> 3	Proneural_OPC_like_tumor	G3	Pri_Recurrence_after_TMZ	1p_19q_codeleted	CNA_Group_ 1	-3.0944788768329699E-2	-5.3821521935803501E-2	G1
A_TGCTCGGTGGGTCACC-1	0	KM4242_01	3	Primary	3 --> 3	Proneural_OPC_like_tumor	G3	Pri_Recurrence_after_TMZ	1p_19q_codeleted	CNA_Group_ 2	3.8298507992645302E-2	-1.1752356658760101E-2	S
A_TGCTCTTGAGAGTTTG-1	0	KM4242_01	3	Primary	3 --> 3	Proneural_OPC_like_tumor	G3	Pri_Recurrence_after_TMZ	1p_19q_codeleted	CNA_Group_ 2	3.1860465588364799E-2	-4.4525056600080201E-2	S
A_TGCTGGTTGGACAATT-1	0	KM4242_01	3	Primary	3 --> 3	Proneural_OPC_like_tumor	G3	Pri_Recurrence_after_TMZ	1p_19q_codeleted	CNA_Group_ 1	6.5819229734882606E-2	2.1310736933680598E-2	S
A_TGCTGTTGAAGAACTC-1	0	KM4242_01	3	Primary	3 --> 3	Proneural_OPC_like_tumor	NA	Pri_Recurrence_after_TMZ	1p_19q_codeleted	CNA_Group_ 1	0.12740252691125301	2.36393074002561E-3	S
A_TGCTTCCCAAGCAGTA-1	0	KM4242_01	3	Primary	3 --> 3	Proneural_OPC_like_tumor	G3	Pri_Recurrence_after_TMZ	1p_19q_codeleted	CNA_Group_ 2	9.6923472710500502E-2	-1.24556741347201E-2	S
A_TGGAAGAAGGGAACGT-1	0	KM4242_01	3	Primary	3 --> 3	Proneural_OPC_like_tumor	G3	Pri_Recurrence_after_TMZ	1p_19q_codeleted	CNA_Group_ 1	4.4214881908532601E-2	5.4407565379553303E-2	G2M
A_TGGAAGACGAACACCA-1	1	KM4242_01	3	Primary	3 --> 3	Oligodendrocyte_like_tumor	NA	Pri_Recurrence_after_TMZ	1p_19q_codeleted	CNA_Group_ 2	4.6429241782420999E-2	3.54322523570074E-2	S
A_TGGAAGGATAAAGATG-1	4	KM4242_01	3	Primary	3 --> 3	Pericyte_Endothelial	Pericyte_Endothelial	Pri_Recurrence_after_TMZ	1p_19q_codeleted	CNA_Group_ 2	0.12868075217250899	-3.3797606371127401E-2	S
A_TGGAATTAGACGCTTT-1	0	KM4242_01	3	Primary	3 --> 3	Proneural_OPC_like_tumor	G3	Pri_Recurrence_after_TMZ	1p_19q_codeleted	CNA_Group_ 3	-1.9449279059472899E-2	-3.02499154619888E-2	G1
A_TGGACCAATCTAAGAT-1	0	KM4242_01	3	Primary	3 --> 3	Proneural_OPC_like_tumor	G3	Pri_Recurrence_after_TMZ	1p_19q_codeleted	CNA_Group_ 1	8.6492167247963006E-2	0.11094651595532599	G2M
A_TGGACTGTTCGCTCAA-1	0	KM4242_01	3	Primary	3 --> 3	Proneural_OPC_like_tumor	NA	Pri_Recurrence_after_TMZ	1p_19q_codeleted	CNA_Group_ 3	-2.0913890155708999E-2	-6.3544317002667298E-3	G1
A_TGGAGTGATGCGATGA-1	0	KM4242_01	3	Primary	3 --> 3	Proneural_OPC_like_tumor	G3	Pri_Recurrence_after_TMZ	1p_19q_codeleted	CNA_Group_ 1	-1.31303125814057E-2	-1.10377149896939E-2	G1
A_TGGCAAACTAAATTAC-1	6	KM4242_01	3	Primary	3 --> 3	IEG	G3	Pri_Recurrence_after_TMZ	1p_19q_codeleted	CNA_Group_ 1	4.3165998955282401E-3	-6.9428556909144207E-2	S
A_TGGCAACTCGCGCGCC-1	1	KM4242_01	3	Primary	3 --> 3	Oligodendrocyte_like_tumor	NA	Pri_Recurrence_after_TMZ	1p_19q_codeleted	CNA_Group_ 2	8.4894786767323094E-2	4.3624279400514597E-3	S
A_TGGCAGATTACGATCA-1	0	KM4242_01	3	Primary	3 --> 3	Proneural_OPC_like_tumor	G3	Pri_Recurrence_after_TMZ	1p_19q_codeleted	CNA_Group_ 1	0.24249504090690499	-5.0935261392224297E-2	S
A_TGGCAGCAGTAATAGT-1	0	KM4242_01	3	Primary	3 --> 3	Proneural_OPC_like_tumor	G3	Pri_Recurrence_after_TMZ	1p_19q_codeleted	CNA_Group_ 1	2.7810880013766599E-2	-7.0913063442393396E-3	S
A_TGGCCAAACTGAAGTA-1	1	KM4242_01	3	Primary	3 --> 3	Oligodendrocyte_like_tumor	NA	Pri_Recurrence_after_TMZ	1p_19q_codeleted	CNA_Group_ 2	6.1860790680472497E-2	-5.31413959329365E-2	S
A_TGGCCGTATATTGACC-1	0	KM4242_01	3	Primary	3 --> 3	Proneural_OPC_like_tumor	G3	Pri_Recurrence_after_TMZ	1p_19q_codeleted	CNA_Group_ 1	-2.8399074132789099E-2	5.8783543961627001E-2	G2M
A_TGGCGATCAAGTTATG-1	0	KM4242_01	3	Primary	3 --> 3	Proneural_OPC_like_tumor	G3	Pri_Recurrence_after_TMZ	1p_19q_codeleted	CNA_Group_ 1	4.6078194817894103E-2	1.7455479952447599E-3	S
A_TGGCTATGTGACATAC-1	6	KM4242_01	3	Primary	3 --> 3	IEG	G3	Pri_Recurrence_after_TMZ	1p_19q_codeleted	CNA_Group_ 1	5.5229534014159302E-2	-3.0451701039333499E-2	S
A_TGGCTTTGGGTAGACA-1	7	KM4242_01	3	Primary	3 --> 3	Cortical_neurons_and_tumor_cells	Cortical_neurons_and_tumor_cells	Pri_Recurrence_after_TMZ	1p_19q_codeleted	CNA_Group_ 3	1.02110778508771E-2	1.4471390397936299E-2	G2M
A_TGGGAAATGCCTTTCC-1	0	KM4242_01	3	Primary	3 --> 3	Proneural_OPC_like_tumor	G3	Pri_Recurrence_after_TMZ	1p_19q_codeleted	CNA_Group_ 3	-2.8272475302616999E-2	6.6744330057430495E-2	G2M
A_TGGGCACGTTCTATGG-1	1	KM4242_01	3	Primary	3 --> 3	Oligodendrocyte_like_tumor	NA	Pri_Recurrence_after_TMZ	1p_19q_codeleted	CNA_Group_ 2	1.33975670830427E-2	-5.2170725656406998E-3	S
A_TGGGCCACAAGAGCGC-1	1	KM4242_01	3	Primary	3 --> 3	Oligodendrocyte_like_tumor	NA	Pri_Recurrence_after_TMZ	1p_19q_codeleted	CNA_Group_ 2	1.8809120961081501E-2	-2.8378645884933301E-2	S
A_TGGGTGCACAAGCCAT-1	0	KM4242_01	3	Primary	3 --> 3	Proneural_OPC_like_tumor	G3	Pri_Recurrence_after_TMZ	1p_19q_codeleted	CNA_Group_ 1	3.7673419486947801E-2	-4.0507427105895999E-2	S
A_TGGTCCCACGCTACGG-1	0	KM4242_01	3	Primary	3 --> 3	Proneural_OPC_like_tumor	G3	Pri_Recurrence_after_TMZ	1p_19q_codeleted	CNA_Group_ 1	2.7480169484682199E-2	-2.20552740093518E-2	S
A_TGGTCTGTTGGGCGTA-1	2	KM4242_01	3	Primary	3 --> 3	NPC_like_tumor	G3	Pri_Recurrence_after_TMZ	non_tumor	NA	-2.3029130446581201E-2	1.3805655052915001E-3	G2M
A_TGGTGATCGTATTTGT-1	0	KM4242_01	3	Primary	3 --> 3	Proneural_OPC_like_tumor	G3	Pri_Recurrence_after_TMZ	1p_19q_codeleted	CNA_Group_ 3	4.4933024881759504E-3	9.2265844842131101E-3	G2M
A_TGGTTCAACGGGTAAT-1	6	KM4242_01	3	Primary	3 --> 3	IEG	G3	Pri_Recurrence_after_TMZ	1p_19q_codeleted	CNA_Group_ 1	8.66089221499655E-3	-4.9726137622698504E-3	S
A_TGGTTCGTAGCAAAGG-1	1	KM4242_01	3	Primary	3 --> 3	Oligodendrocyte_like_tumor	NA	Pri_Recurrence_after_TMZ	1p_19q_codeleted	CNA_Group_ 2	-1.06345623728993E-2	-2.7179480717383901E-2	G1
A_TGTAATGACCACAATA-1	0	KM4242_01	3	Primary	3 --> 3	Proneural_OPC_like_tumor	G3	Pri_Recurrence_after_TMZ	1p_19q_codeleted	CNA_Group_ 1	-3.0301419015721701E-2	-4.5890073162457301E-2	G1
A_TGTACGAACAAATCCG-1	0	KM4242_01	3	Primary	3 --> 3	Proneural_OPC_like_tumor	G3	Pri_Recurrence_after_TMZ	1p_19q_codeleted	CNA_Group_ 1	2.0507137749171501E-2	1.386549658791E-2	S
A_TGTAGCCAATTCCGTT-1	0	KM4242_01	3	Primary	3 --> 3	Proneural_OPC_like_tumor	G3	Pri_Recurrence_after_TMZ	1p_19q_codeleted	CNA_Group_ 1	-3.0623103985911799E-2	-3.5068469097849997E-2	G1
A_TGTAGGAGAAATTTCC-1	1	KM4242_01	3	Primary	3 --> 3	Oligodendrocyte_like_tumor	NA	Pri_Recurrence_after_TMZ	1p_19q_codeleted	CNA_Group_ 2	2.4048682331096E-2	-5.1959974256865903E-2	S
A_TGTAGTGATCTATAAT-1	0	KM4242_01	3	Primary	3 --> 3	Proneural_OPC_like_tumor	G3	Pri_Recurrence_after_TMZ	1p_19q_codeleted	CNA_Group_ 1	2.1048021431960402E-2	0.12375470160586401	G2M
A_TGTATAACAGATCCTG-1	1	KM4242_01	3	Primary	3 --> 3	Oligodendrocyte_like_tumor	NA	Pri_Recurrence_after_TMZ	1p_19q_codeleted	CNA_Group_ 2	1.0235393810696601E-2	7.5419953671976805E-2	G2M
A_TGTCCGTGGCGCCTTT-1	0	KM4242_01	3	Primary	3 --> 3	Proneural_OPC_like_tumor	G3	Pri_Recurrence_after_TMZ	1p_19q_codeleted	CNA_Group_ 1	-7.9590113492217802E-3	-4.5138494500415002E-2	G1
A_TGTCCTAAGTCACCGC-1	5	KM4242_01	3	Primary	3 --> 3	NPC_like_and_DNA_damage	G3	Pri_Recurrence_after_TMZ	1p_19q_codeleted	CNA_Group_ 1	-2.3203786734951399E-2	-5.3598123415705398E-2	G1
A_TGTGACTACGCCAGTC-1	7	KM4242_01	3	Primary	3 --> 3	Cortical_neurons_and_tumor_cells	Cortical_neurons_and_tumor_cells	Pri_Recurrence_after_TMZ	non_tumor	CNA_Group_ 3	-4.1120288411758403E-2	-2.52502007228751E-2	G1
A_TGTGAGACTAGCCCAA-1	0	KM4242_01	3	Primary	3 --> 3	Proneural_OPC_like_tumor	G3	Pri_Recurrence_after_TMZ	1p_19q_codeleted	CNA_Group_ 1	3.1448902915715803E-2	-4.3140383604452597E-3	S
A_TGTGCTTTACGTAAGA-1	0	KM4242_01	3	Primary	3 --> 3	Proneural_OPC_like_tumor	G3	Pri_Recurrence_after_TMZ	1p_19q_codeleted	CNA_Group_ 1	7.0446725619906199E-3	1.09955437279841E-2	G2M
A_TGTGGCAAAGCGTATG-1	4	KM4242_01	3	Primary	3 --> 3	Pericyte_Endothelial	Pericyte_Endothelial	Pri_Recurrence_after_TMZ	1p_19q_codeleted	CNA_Group_ 2	-4.2132366062043597E-2	-2.4611614234892401E-2	G1
A_TGTGTCGCGAGTTGCA-1	0	KM4242_01	3	Primary	3 --> 3	Proneural_OPC_like_tumor	G3	Pri_Recurrence_after_TMZ	1p_19q_codeleted	CNA_Group_ 1	4.0906899741438497E-2	3.5544610859785997E-2	S
A_TGTGTTCGTATCCAAG-1	0	KM4242_01	3	Primary	3 --> 3	Proneural_OPC_like_tumor	G3	Pri_Recurrence_after_TMZ	1p_19q_codeleted	CNA_Group_ 1	-1.8808409785791001E-3	-3.6331539005546497E-2	G1
A_TGTTATTGTATGTGGC-1	3	KM4242_01	3	Primary	3 --> 3	RBCs	RBCs	Pri_Recurrence_after_TMZ	1p_19q_codeleted	CNA_Group_ 1	9.4434538965736895E-3	2.7705334292006702E-2	G2M
A_TGTTCCGCTTCCATGA-1	0	KM4242_01	3	Primary	3 --> 3	Proneural_OPC_like_tumor	G3	Pri_Recurrence_after_TMZ	1p_19q_codeleted	CNA_Group_ 1	3.1499585765898799E-2	-4.0742862152243403E-2	S
A_TGTTCGTATTGCGGTG-1	0	KM4242_01	3	Primary	3 --> 3	Proneural_OPC_like_tumor	G3	Pri_Recurrence_after_TMZ	1p_19q_codeleted	CNA_Group_ 2	8.6014668615552892E-3	-4.8405432840923097E-3	S
A_TGTTCTTCCATTGACT-1	0	KM4242_01	3	Primary	3 --> 3	Proneural_OPC_like_tumor	G3	Pri_Recurrence_after_TMZ	1p_19q_codeleted	CNA_Group_ 1	-2.2313532001532799E-2	-3.3167253379554999E-2	G1
A_TGTTGTCAAGAAGTCT-1	1	KM4242_01	3	Primary	3 --> 3	Oligodendrocyte_like_tumor	NA	Pri_Recurrence_after_TMZ	1p_19q_codeleted	CNA_Group_ 3	3.4919739525582298E-2	4.0211034538871399E-2	G2M
A_TGTTTCGGTACTTCTC-1	1	KM4242_01	3	Primary	3 --> 3	Oligodendrocyte_like_tumor	NA	Pri_Recurrence_after_TMZ	1p_19q_codeleted	CNA_Group_ 3	1.47788720457586E-2	1.7801306977800298E-2	G2M
A_TTAAACTCGAATTCAT-1	3	KM4242_01	3	Primary	3 --> 3	RBCs	RBCs	Pri_Recurrence_after_TMZ	1p_19q_codeleted	CNA_Group_ 3	1.5585185868010901E-2	-4.9152439628727201E-2	S
A_TTAACACCTCGAACAT-1	2	KM4242_01	3	Primary	3 --> 3	NPC_like_tumor	G3	Pri_Recurrence_after_TMZ	1p_19q_codeleted	NA	-1.54064506376447E-2	7.2738076450421197E-3	G2M
A_TTAACCAACCCTCCCT-1	4	KM4242_01	3	Primary	3 --> 3	Pericyte_Endothelial	Pericyte_Endothelial	Pri_Recurrence_after_TMZ	1p_19q_codeleted	CNA_Group_ 3	-4.7027016079446801E-2	-2.1345248702692401E-2	G1
A_TTAAGCGCCTGACCCA-1	0	KM4242_01	3	Primary	3 --> 3	Proneural_OPC_like_tumor	G3	Pri_Recurrence_after_TMZ	1p_19q_codeleted	CNA_Group_ 1	1.50574262927095E-3	1.07728250944046E-2	G2M
A_TTAAGTATTGTTATCC-1	0	KM4242_01	3	Primary	3 --> 3	Proneural_OPC_like_tumor	G3	Pri_Recurrence_after_TMZ	1p_19q_codeleted	CNA_Group_ 1	0.11912853852618099	-8.6534310048971797E-4	S
A_TTAATCAGTACGTCAG-1	1	KM4242_01	3	Primary	3 --> 3	Oligodendrocyte_like_tumor	NA	Pri_Recurrence_after_TMZ	1p_19q_codeleted	CNA_Group_ 3	-4.2122222064895999E-2	-4.2265896037059103E-2	G1
A_TTAATGTAGACCAGGT-1	7	KM4242_01	3	Primary	3 --> 3	Cortical_neurons_and_tumor_cells	Cortical_neurons_and_tumor_cells	Pri_Recurrence_after_TMZ	1p_19q_codeleted	CNA_Group_ 3	-9.9697916327853896E-4	9.3922111775116401E-3	G2M
A_TTAATTGCTTTGGGTG-1	0	KM4242_01	3	Primary	3 --> 3	Proneural_OPC_like_tumor	G3	Pri_Recurrence_after_TMZ	1p_19q_codeleted	CNA_Group_ 2	2.8076339885679001E-2	1.7466411144105E-2	S
A_TTAATTTCAGACGCGG-1	1	KM4242_01	3	Primary	3 --> 3	Oligodendrocyte_like_tumor	NA	Pri_Recurrence_after_TMZ	1p_19q_codeleted	CNA_Group_ 3	-2.1645773023859598E-2	3.7478896216718602E-3	G2M
A_TTACAACTACGCATCC-1	0	KM4242_01	3	Primary	3 --> 3	Proneural_OPC_like_tumor	NA	Pri_Recurrence_after_TMZ	1p_19q_codeleted	CNA_Group_ 3	4.07979378718678E-2	8.0965146781361602E-2	G2M
A_TTACAGACCTAAATGA-1	7	KM4242_01	3	Primary	3 --> 3	Cortical_neurons_and_tumor_cells	Cortical_neurons_and_tumor_cells	Pri_Recurrence_after_TMZ	non_tumor	CNA_Group_ 3	-2.5700248285543199E-2	-3.4863053015799401E-2	G1
A_TTACATCGTGGCCTGG-1	0	KM4242_01	3	Primary	3 --> 3	Proneural_OPC_like_tumor	G3	Pri_Recurrence_after_TMZ	1p_19q_codeleted	CNA_Group_ 3	6.46283376210295E-2	-3.0780988056284802E-3	S
A_TTACCATTGATTACCC-1	2	KM4242_01	3	Primary	3 --> 3	NPC_like_tumor	G3	Pri_Recurrence_after_TMZ	non_tumor	NA	1.5648287464966399E-2	-5.10730595909673E-2	S
A_TTACCCATTGCCGGGT-1	1	KM4242_01	3	Primary	3 --> 3	Oligodendrocyte_like_tumor	NA	Pri_Recurrence_after_TMZ	1p_19q_codeleted	CNA_Group_ 3	-3.0390942254231001E-2	5.4995852885047101E-3	G2M
A_TTACCCTAACAGTCCT-1	4	KM4242_01	3	Primary	3 --> 3	Pericyte_Endothelial	Pericyte_Endothelial	Pri_Recurrence_after_TMZ	1p_19q_codeleted	CNA_Group_ 1	2.7289086653817698E-2	-1.9528205094209199E-2	S
A_TTACCCTAGGGATTGG-1	0	KM4242_01	3	Primary	3 --> 3	Proneural_OPC_like_tumor	G3	Pri_Recurrence_after_TMZ	1p_19q_codeleted	CNA_Group_ 4	8.62769565702322E-3	1.7035403461669901E-2	G2M
A_TTACGGATGGTTCGAG-1	3	KM4242_01	3	Primary	3 --> 3	RBCs	RBCs	Pri_Recurrence_after_TMZ	1p_19q_codeleted	CNA_Group_ 3	-8.7591730101599895E-3	3.6150970792372498E-3	G2M
A_TTACTAAAGGACTTTA-1	6	KM4242_01	3	Primary	3 --> 3	IEG	NA	Pri_Recurrence_after_TMZ	1p_19q_codeleted	CNA_Group_ 1	-1.6496675880575001E-2	-4.9781781608640698E-2	G1
A_TTACTATCGGCTTCTC-1	0	KM4242_01	3	Primary	3 --> 3	Proneural_OPC_like_tumor	G3	Pri_Recurrence_after_TMZ	1p_19q_codeleted	CNA_Group_ 1	1.9589664609726099E-2	5.24048618314568E-3	S
A_TTACTCCGGCCGGGAA-1	1	KM4242_01	3	Primary	3 --> 3	Oligodendrocyte_like_tumor	NA	Pri_Recurrence_after_TMZ	1p_19q_codeleted	CNA_Group_ 3	7.6031816396423396E-2	1.38999580322875E-3	S
A_TTACTCTGGTACGTAC-1	0	KM4242_01	3	Primary	3 --> 3	Proneural_OPC_like_tumor	G3	Pri_Recurrence_after_TMZ	1p_19q_codeleted	CNA_Group_ 1	-3.7612444191340702E-2	-2.07628423634625E-2	G1
A_TTACTGGGATATTTCA-1	0	KM4242_01	3	Primary	3 --> 3	Proneural_OPC_like_tumor	G3	Pri_Recurrence_after_TMZ	1p_19q_codeleted	CNA_Group_ 1	-5.8623050728809599E-2	2.11547536704693E-2	G2M
A_TTAGAAGAACATGACT-1	0	KM4242_01	3	Primary	3 --> 3	Proneural_OPC_like_tumor	G3	Pri_Recurrence_after_TMZ	1p_19q_codeleted	CNA_Group_ 2	-4.00571023345241E-2	-4.0887852583369397E-2	G1
A_TTAGACGAGTCACCTC-1	0	KM4242_01	3	Primary	3 --> 3	Proneural_OPC_like_tumor	NA	Pri_Recurrence_after_TMZ	1p_19q_codeleted	CNA_Group_ 1	2.0187558494173301E-2	7.2456930230032607E-2	G2M
A_TTAGAGTTTAGAAGGA-1	1	KM4242_01	3	Primary	3 --> 3	Oligodendrocyte_like_tumor	NA	Pri_Recurrence_after_TMZ	1p_19q_codeleted	CNA_Group_ 3	-1.830913056182E-2	0.191284145424747	G2M
A_TTAGCAACATGGATGT-1	4	KM4242_01	3	Primary	3 --> 3	Pericyte_Endothelial	Pericyte_Endothelial	Pri_Recurrence_after_TMZ	1p_19q_codeleted	CNA_Group_ 2	-1.8974374609161501E-2	-1.73447990217966E-2	G1
A_TTAGCTCTGTAATCCG-1	0	KM4242_01	3	Primary	3 --> 3	Proneural_OPC_like_tumor	G3	Pri_Recurrence_after_TMZ	1p_19q_codeleted	CNA_Group_ 1	-5.6993970216280103E-2	2.7227048054825299E-3	G2M
A_TTAGTAGGGCGGCGGG-1	5	KM4242_01	3	Primary	3 --> 3	NPC_like_and_DNA_damage	G3	Pri_Recurrence_after_TMZ	non_tumor	CNA_Group_ 1	0.153325526905364	-2.41290250463853E-2	S
A_TTATAGGTAATTGTCT-1	0	KM4242_01	3	Primary	3 --> 3	Proneural_OPC_like_tumor	G3	Pri_Recurrence_after_TMZ	1p_19q_codeleted	CNA_Group_ 2	-1.17766745347096E-2	-1.2022581970285001E-2	G1
A_TTATATACGCTGTCAC-1	0	KM4242_01	3	Primary	3 --> 3	Proneural_OPC_like_tumor	NA	Pri_Recurrence_after_TMZ	1p_19q_codeleted	CNA_Group_ 1	-5.9206407839836099E-2	2.9741189531157699E-2	G2M
A_TTATATTTGGCAATCC-1	1	KM4242_01	3	Primary	3 --> 3	Oligodendrocyte_like_tumor	NA	Pri_Recurrence_after_TMZ	1p_19q_codeleted	CNA_Group_ 3	7.8458886093848903E-3	7.5523337996436903E-3	S
A_TTATCCGGGATCTATA-1	4	KM4242_01	3	Primary	3 --> 3	Pericyte_Endothelial	Pericyte_Endothelial	Pri_Recurrence_after_TMZ	1p_19q_codeleted	CNA_Group_ 1	6.1315631636043302E-3	-3.8029776269568299E-2	S
A_TTATCGCCTGCGAAGC-1	0	KM4242_01	3	Primary	3 --> 3	Proneural_OPC_like_tumor	G3	Pri_Recurrence_after_TMZ	1p_19q_codeleted	CNA_Group_ 3	2.9384452979573299E-2	-1.4649357418137899E-2	S
A_TTATCTGTATCATAAC-1	1	KM4242_01	3	Primary	3 --> 3	Oligodendrocyte_like_tumor	NA	Pri_Recurrence_after_TMZ	1p_19q_codeleted	CNA_Group_ 3	5.6330813229173403E-2	9.0206214841875593E-3	S
A_TTATGAATGAAAGGGA-1	0	KM4242_01	3	Primary	3 --> 3	Proneural_OPC_like_tumor	G3	Pri_Recurrence_after_TMZ	1p_19q_codeleted	CNA_Group_ 1	-1.7108770588549101E-2	3.1247881364265401E-2	G2M
A_TTATGACAAACTGGAT-1	0	KM4242_01	3	Primary	3 --> 3	Proneural_OPC_like_tumor	G3	Pri_Recurrence_after_TMZ	1p_19q_codeleted	CNA_Group_ 1	5.9207004744364203E-2	-4.5084850493485103E-2	S
A_TTATGATCTTAACGAA-1	1	KM4242_01	3	Primary	3 --> 3	Oligodendrocyte_like_tumor	NA	Pri_Recurrence_after_TMZ	1p_19q_codeleted	CNA_Group_ 1	3.3119031503549501E-2	1.14295336318624E-2	S
A_TTATGTTTGCGATAGA-1	2	KM4242_01	3	Primary	3 --> 3	NPC_like_tumor	G3	Pri_Recurrence_after_TMZ	non_tumor	NA	-1.54734483012466E-2	1.0459052241465001E-2	G2M
A_TTATTAGAGCGTGTTC-1	0	KM4242_01	3	Primary	3 --> 3	Proneural_OPC_like_tumor	G3	Pri_Recurrence_after_TMZ	1p_19q_codeleted	CNA_Group_ 1	-4.88322963058559E-2	1.83081170893451E-3	G2M
A_TTATTAGGGAAGCATC-1	1	KM4242_01	3	Primary	3 --> 3	Oligodendrocyte_like_tumor	NA	Pri_Recurrence_after_TMZ	1p_19q_codeleted	CNA_Group_ 3	-1.0886730698986199E-2	3.0870824671951902E-3	G2M
A_TTCAAAGTCTCTAGCC-1	1	KM4242_01	3	Primary	3 --> 3	Oligodendrocyte_like_tumor	NA	Pri_Recurrence_after_TMZ	1p_19q_codeleted	CNA_Group_ 1	4.2157201624388997E-2	3.1088529411201299E-2	S
A_TTCAACGACCCGACCG-1	0	KM4242_01	3	Primary	3 --> 3	Proneural_OPC_like_tumor	NA	Pri_Recurrence_after_TMZ	1p_19q_codeleted	CNA_Group_ 1	6.1953701648366603E-2	-3.9080481469613597E-3	S
A_TTCAATACTCTGAATC-1	7	KM4242_01	3	Primary	3 --> 3	Cortical_neurons_and_tumor_cells	Cortical_neurons_and_tumor_cells	Pri_Recurrence_after_TMZ	non_tumor	CNA_Group_ 3	4.0790546692427897E-2	1.39281785450499E-2	S
A_TTCACGAAAGGATCAC-1	0	KM4242_01	3	Primary	3 --> 3	Proneural_OPC_like_tumor	G3	Pri_Recurrence_after_TMZ	1p_19q_codeleted	CNA_Group_ 2	5.1171810163889497E-2	3.2214904863853797E-2	S
A_TTCACTCGAGCACCTA-1	0	KM4242_01	3	Primary	3 --> 3	Proneural_OPC_like_tumor	G3	Pri_Recurrence_after_TMZ	1p_19q_codeleted	CNA_Group_ 2	3.91963930603021E-2	-2.2867800639958101E-2	S
A_TTCAGCCCTGGTCCAC-1	4	KM4242_01	3	Primary	3 --> 3	Pericyte_Endothelial	Pericyte_Endothelial	Pri_Recurrence_after_TMZ	1p_19q_codeleted	CNA_Group_ 3	4.51310925737494E-2	-3.9060084238584897E-2	S
A_TTCAGGCGTCAAAGCC-1	0	KM4242_01	3	Primary	3 --> 3	Proneural_OPC_like_tumor	G3	Pri_Recurrence_after_TMZ	1p_19q_codeleted	CNA_Group_ 1	1.51557409242341E-2	3.0509437004044099E-2	G2M
A_TTCATGGCGCAACAGG-1	1	KM4242_01	3	Primary	3 --> 3	Oligodendrocyte_like_tumor	NA	Pri_Recurrence_after_TMZ	1p_19q_codeleted	CNA_Group_ 2	-1.3721718354644899E-2	-3.3257833338992699E-3	G1
A_TTCCACACAGATTTGA-1	0	KM4242_01	3	Primary	3 --> 3	Proneural_OPC_like_tumor	G3	Pri_Recurrence_after_TMZ	1p_19q_codeleted	CNA_Group_ 1	5.4958143452941297E-2	-5.12952753579669E-2	S
A_TTCCGCGTGAGGCGAT-1	0	KM4242_01	3	Primary	3 --> 3	Proneural_OPC_like_tumor	G3	Pri_Recurrence_after_TMZ	1p_19q_codeleted	CNA_Group_ 2	-4.0230363472505498E-2	-7.3312236058590604E-3	G1
A_TTCCGGCCTTGAGGCT-1	0	KM4242_01	3	Primary	3 --> 3	Proneural_OPC_like_tumor	G3	Pri_Recurrence_after_TMZ	1p_19q_codeleted	CNA_Group_ 1	9.1229899024376296E-2	-3.8430284942642702E-2	S
A_TTCCTCGAGGGTGTCT-1	0	KM4242_01	3	Primary	3 --> 3	Proneural_OPC_like_tumor	NA	Pri_Recurrence_after_TMZ	1p_19q_codeleted	CNA_Group_ 1	-2.7191263407698998E-3	0.113424643635581	G2M
A_TTCCTCGGACTAACCA-1	3	KM4242_01	3	Primary	3 --> 3	RBCs	RBCs	Pri_Recurrence_after_TMZ	1p_19q_codeleted	CNA_Group_ 1	8.6566183985113801E-2	-2.6815867540702601E-2	S
A_TTCCTCTGCCCGAATA-1	4	KM4242_01	3	Primary	3 --> 3	Pericyte_Endothelial	Pericyte_Endothelial	Pri_Recurrence_after_TMZ	1p_19q_codeleted	CNA_Group_ 1	1.45800261302286E-2	-2.4647518485175102E-2	S
A_TTCGACAGAGCCCGTG-1	5	KM4242_01	3	Primary	3 --> 3	NPC_like_and_DNA_damage	G3	Pri_Recurrence_after_TMZ	1p_19q_codeleted	CNA_Group_ 1	5.4538974418603101E-2	2.4016300204723801E-2	S
A_TTCGACGGGAAGGGCG-1	0	KM4242_01	3	Primary	3 --> 3	Proneural_OPC_like_tumor	G3	Pri_Recurrence_after_TMZ	1p_19q_codeleted	CNA_Group_ 3	4.6746629745525001E-2	-4.2098952052887002E-2	S
A_TTCGCACTCGCGTGCT-1	5	KM4242_01	3	Primary	3 --> 3	NPC_like_and_DNA_damage	G3	Pri_Recurrence_after_TMZ	1p_19q_codeleted	CNA_Group_ 1	-5.4993405236841697E-4	8.4200592314318798E-2	G2M
A_TTCGCACTGTACGACA-1	0	KM4242_01	3	Primary	3 --> 3	Proneural_OPC_like_tumor	G3	Pri_Recurrence_after_TMZ	1p_19q_codeleted	CNA_Group_ 2	6.7878133554581596E-3	4.6188366363657902E-3	S
A_TTCGGGACTAATCGCG-1	0	KM4242_01	3	Primary	3 --> 3	Proneural_OPC_like_tumor	NA	Pri_Recurrence_after_TMZ	1p_19q_codeleted	CNA_Group_ 1	0.12206204522651	0.12779722510217301	G2M
A_TTCGGTACTGTAGAGG-1	0	KM4242_01	3	Primary	3 --> 3	Proneural_OPC_like_tumor	G3	Pri_Recurrence_after_TMZ	1p_19q_codeleted	CNA_Group_ 1	4.9928581977669799E-2	-6.9653250001577502E-2	S
A_TTCGTACTCCAGAACG-1	4	KM4242_01	3	Primary	3 --> 3	Pericyte_Endothelial	Pericyte_Endothelial	Pri_Recurrence_after_TMZ	1p_19q_codeleted	CNA_Group_ 3	3.8443879904461797E-2	-4.2827281897547601E-2	S
A_TTCTAACCGAAGCTTA-1	1	KM4242_01	3	Primary	3 --> 3	Oligodendrocyte_like_tumor	NA	Pri_Recurrence_after_TMZ	1p_19q_codeleted	CNA_Group_ 2	-3.07574166080525E-2	-6.0062354092178499E-2	G1
A_TTCTACTTGCGAGGGC-1	0	KM4242_01	3	Primary	3 --> 3	Proneural_OPC_like_tumor	G3	Pri_Recurrence_after_TMZ	1p_19q_codeleted	CNA_Group_ 3	3.14427445986733E-2	6.9217304345004496E-3	S
A_TTCTAGGCCAATTGTG-1	0	KM4242_01	3	Primary	3 --> 3	Proneural_OPC_like_tumor	G3	Pri_Recurrence_after_TMZ	1p_19q_codeleted	CNA_Group_ 1	3.1266862367503097E-2	6.2010701657224804E-3	S
A_TTCTGACCGGGCTCAA-1	0	KM4242_01	3	Primary	3 --> 3	Proneural_OPC_like_tumor	NA	Pri_Recurrence_after_TMZ	1p_19q_codeleted	CNA_Group_ 1	-3.4532005008146602E-3	-2.9637405010662799E-2	G1
A_TTCTGCCGCGCCTAGA-1	0	KM4242_01	3	Primary	3 --> 3	Proneural_OPC_like_tumor	G3	Pri_Recurrence_after_TMZ	1p_19q_codeleted	CNA_Group_ 1	-4.5266077109091203E-2	1.10620107800719E-2	G2M
A_TTCTGCGAGCGCCCTT-1	2	KM4242_01	3	Primary	3 --> 3	NPC_like_tumor	G3	Pri_Recurrence_after_TMZ	non_tumor	NA	9.2637063774158701E-2	-2.9180131056373598E-2	S
A_TTCTGCGGGTTAGCGG-1	4	KM4242_01	3	Primary	3 --> 3	Pericyte_Endothelial	Pericyte_Endothelial	Pri_Recurrence_after_TMZ	1p_19q_codeleted	CNA_Group_ 1	1.7083268222538701E-2	-6.2853301112389307E-2	S
A_TTCTTAGTGAACGGTG-1	1	KM4242_01	3	Primary	3 --> 3	Oligodendrocyte_like_tumor	G3	Pri_Recurrence_after_TMZ	1p_19q_codeleted	CNA_Group_ 2	-1.3804857559290701E-2	1.1990099258653001E-2	G2M
A_TTCTTAGTGGCTCAGA-1	1	KM4242_01	3	Primary	3 --> 3	Oligodendrocyte_like_tumor	NA	Pri_Recurrence_after_TMZ	1p_19q_codeleted	CNA_Group_ 3	1.6114813458899299E-2	-1.6177390487057498E-2	S
A_TTCTTGAGCCGCGCTA-1	0	KM4242_01	3	Primary	3 --> 3	Proneural_OPC_like_tumor	G3	Pri_Recurrence_after_TMZ	1p_19q_codeleted	CNA_Group_ 1	2.74272953426048E-2	8.2696876367119292E-3	S
A_TTCTTGGAGTAATGAG-1	1	KM4242_01	3	Primary	3 --> 3	Oligodendrocyte_like_tumor	NA	Pri_Recurrence_after_TMZ	1p_19q_codeleted	CNA_Group_ 2	-3.5868254777746002E-2	2.1916331249147099E-2	G2M
A_TTCTTGTAACCTAATG-1	0	KM4242_01	3	Primary	3 --> 3	Proneural_OPC_like_tumor	G3	Pri_Recurrence_after_TMZ	1p_19q_codeleted	CNA_Group_ 1	1.1234255822009699E-4	1.6145188982561301E-2	G2M
A_TTGAACGACGTGCTGA-1	0	KM4242_01	3	Primary	3 --> 3	Proneural_OPC_like_tumor	G3	Pri_Recurrence_after_TMZ	1p_19q_codeleted	CNA_Group_ 1	-1.42085231428402E-3	-3.1828475374833499E-2	G1
A_TTGAAGAATTCCCAGG-1	0	KM4242_01	3	Primary	3 --> 3	Proneural_OPC_like_tumor	G3	Pri_Recurrence_after_TMZ	1p_19q_codeleted	CNA_Group_ 1	8.3732452835727805E-2	3.6762452802507402E-2	S
A_TTGAATATGGACTTTC-1	1	KM4242_01	3	Primary	3 --> 3	Oligodendrocyte_like_tumor	NA	Pri_Recurrence_after_TMZ	1p_19q_codeleted	CNA_Group_ 3	-1.31946891518186E-2	1.39585793111211E-2	G2M
A_TTGACATGAACGTGGA-1	0	KM4242_01	3	Primary	3 --> 3	Proneural_OPC_like_tumor	G3	Pri_Recurrence_after_TMZ	1p_19q_codeleted	CNA_Group_ 1	4.0140556916320798E-2	-4.70695635629391E-2	S
A_TTGACCAGGAACAACT-1	0	KM4242_01	3	Primary	3 --> 3	Proneural_OPC_like_tumor	G3	Pri_Recurrence_after_TMZ	1p_19q_codeleted	CNA_Group_ 1	-5.3832312321931003E-2	7.5737916744305606E-2	G2M
A_TTGACCATGTTCTCCG-1	1	KM4242_01	3	Primary	3 --> 3	Oligodendrocyte_like_tumor	NA	Pri_Recurrence_after_TMZ	1p_19q_codeleted	CNA_Group_ 3	-1.58068877359738E-3	-3.42145707393198E-2	G1
A_TTGACTACCATATGGT-1	0	KM4242_01	3	Primary	3 --> 3	Proneural_OPC_like_tumor	G3	Pri_Recurrence_after_TMZ	1p_19q_codeleted	CNA_Group_ 1	0.13853238730210601	-4.6562560768960801E-2	S
A_TTGAGAAGTTTAGCAT-1	1	KM4242_01	3	Primary	3 --> 3	Oligodendrocyte_like_tumor	NA	Pri_Recurrence_after_TMZ	1p_19q_codeleted	CNA_Group_ 1	3.02958389482504E-2	-2.7029084165050201E-2	S
A_TTGAGAGTACTGCTAA-1	0	KM4242_01	3	Primary	3 --> 3	Proneural_OPC_like_tumor	G3	Pri_Recurrence_after_TMZ	1p_19q_codeleted	CNA_Group_ 1	2.81203925736194E-2	-3.3845395449727401E-2	S
A_TTGATCTAACTTTGTC-1	0	KM4242_01	3	Primary	3 --> 3	Proneural_OPC_like_tumor	G3	Pri_Recurrence_after_TMZ	1p_19q_codeleted	CNA_Group_ 1	0.104686931062902	7.8742196015953003E-2	S
A_TTGATGTGTAGTCCCG-1	1	KM4242_01	3	Primary	3 --> 3	Oligodendrocyte_like_tumor	NA	Pri_Recurrence_after_TMZ	1p_19q_codeleted	CNA_Group_ 3	-5.2929854023989302E-2	-5.0388762081250101E-2	G1
A_TTGATTAGCTGTTTCT-1	0	KM4242_01	3	Primary	3 --> 3	Proneural_OPC_like_tumor	G3	Pri_Recurrence_after_TMZ	1p_19q_codeleted	CNA_Group_ 1	8.69140462250797E-2	-4.8913603025293899E-2	S
A_TTGATTATGCAGATGA-1	0	KM4242_01	3	Primary	3 --> 3	Proneural_OPC_like_tumor	G3	Pri_Recurrence_after_TMZ	1p_19q_codeleted	CNA_Group_ 1	3.4722844721239599E-2	6.6231163883747101E-3	S
A_TTGCACAATTCAGAAA-1	0	KM4242_01	3	Primary	3 --> 3	Proneural_OPC_like_tumor	G3	Pri_Recurrence_after_TMZ	1p_19q_codeleted	CNA_Group_ 1	8.5167218277019799E-2	-2.9213483701714098E-2	S
A_TTGCACGGAGCAGCAC-1	1	KM4242_01	3	Primary	3 --> 3	Oligodendrocyte_like_tumor	NA	Pri_Recurrence_after_TMZ	1p_19q_codeleted	CNA_Group_ 4	4.6161374926663497E-3	-1.5210093871983001E-2	S
A_TTGCATGCTGATCACG-1	0	KM4242_01	3	Primary	3 --> 3	Proneural_OPC_like_tumor	G3	Pri_Recurrence_after_TMZ	1p_19q_codeleted	CNA_Group_ 1	1.74112673477404E-2	-3.2891906736179297E-2	S
A_TTGCCCTGATCACGGG-1	2	KM4242_01	3	Primary	3 --> 3	NPC_like_tumor	G3	Pri_Recurrence_after_TMZ	1p_19q_codeleted	NA	-4.9913556568136598E-2	-2.0708459580044799E-2	G1
A_TTGCCGCTTTCTAGTA-1	4	KM4242_01	3	Primary	3 --> 3	Pericyte_Endothelial	Pericyte_Endothelial	Pri_Recurrence_after_TMZ	1p_19q_codeleted	CNA_Group_ 2	4.4943522343825398E-2	4.3255739435907201E-2	S
A_TTGCGGCATCAGAAAG-1	0	KM4242_01	3	Primary	3 --> 3	Proneural_OPC_like_tumor	G3	Pri_Recurrence_after_TMZ	1p_19q_codeleted	CNA_Group_ 1	3.6855285753650699E-2	-2.6020414160905302E-2	S
A_TTGCGTAGTTTGAGGA-1	0	KM4242_01	3	Primary	3 --> 3	Proneural_OPC_like_tumor	G3	Pri_Recurrence_after_TMZ	1p_19q_codeleted	CNA_Group_ 3	-3.9025078621208E-3	3.4454804391352498E-2	G2M
A_TTGCGTCGGCCAACCG-1	0	KM4242_01	3	Primary	3 --> 3	Proneural_OPC_like_tumor	G3	Pri_Recurrence_after_TMZ	1p_19q_codeleted	CNA_Group_ 1	6.8506020488834293E-2	3.1273420630237497E-2	S
A_TTGCGTGTGTAGGCAT-1	0	KM4242_01	3	Primary	3 --> 3	Proneural_OPC_like_tumor	G3	Pri_Recurrence_after_TMZ	1p_19q_codeleted	CNA_Group_ 1	-1.00221924676351E-2	-1.4347021268212801E-2	G1
A_TTGCTCCCATACCGGA-1	1	KM4242_01	3	Primary	3 --> 3	Oligodendrocyte_like_tumor	NA	Pri_Recurrence_after_TMZ	1p_19q_codeleted	CNA_Group_ 3	4.36348889501703E-2	5.0412296180020903E-2	G2M
A_TTGCTGAAGGAACCAC-1	4	KM4242_01	3	Primary	3 --> 3	Pericyte_Endothelial	Pericyte_Endothelial	Pri_Recurrence_after_TMZ	1p_19q_codeleted	CNA_Group_ 2	0.100066615386702	-5.8563267189798403E-3	S
A_TTGCTGATCATGTTCG-1	0	KM4242_01	3	Primary	3 --> 3	Proneural_OPC_like_tumor	G3	Pri_Recurrence_after_TMZ	1p_19q_codeleted	CNA_Group_ 1	2.0016847303106901E-2	4.5778378372037999E-2	G2M
A_TTGGACATGTGGCTTA-1	5	KM4242_01	3	Primary	3 --> 3	NPC_like_and_DNA_damage	G3	Pri_Recurrence_after_TMZ	1p_19q_codeleted	CNA_Group_ 1	7.7639375301283994E-2	-1.57518724197191E-2	S
A_TTGGACCTATAACAGT-1	0	KM4242_01	3	Primary	3 --> 3	Proneural_OPC_like_tumor	G3	Pri_Recurrence_after_TMZ	1p_19q_codeleted	CNA_Group_ 1	5.6725602614023096E-3	-8.7670404238413303E-3	S
A_TTGGATATCGTCTACG-1	0	KM4242_01	3	Primary	3 --> 3	Proneural_OPC_like_tumor	G3	Pri_Recurrence_after_TMZ	1p_19q_codeleted	CNA_Group_ 1	3.4826240953767101E-2	-5.2400059259242397E-2	S
A_TTGGATTGGGTACCAC-1	1	KM4242_01	3	Primary	3 --> 3	Oligodendrocyte_like_tumor	NA	Pri_Recurrence_after_TMZ	1p_19q_codeleted	CNA_Group_ 3	-3.8128646915788898E-2	-2.30240984411887E-2	G1
A_TTGGCCTAGAATTTCG-1	1	KM4242_01	3	Primary	3 --> 3	Oligodendrocyte_like_tumor	NA	Pri_Recurrence_after_TMZ	1p_19q_codeleted	CNA_Group_ 2	-4.16427640651654E-2	3.3290082594357097E-2	G2M
A_TTGGCTCGCATGAGAC-1	0	KM4242_01	3	Primary	3 --> 3	Proneural_OPC_like_tumor	G3	Pri_Recurrence_after_TMZ	1p_19q_codeleted	CNA_Group_ 1	9.2994705012751006E-2	2.1698531819200301E-2	S
A_TTGGGACACTGCCCGC-1	1	KM4242_01	3	Primary	3 --> 3	Oligodendrocyte_like_tumor	NA	Pri_Recurrence_after_TMZ	1p_19q_codeleted	CNA_Group_ 3	-2.62188217165754E-2	-1.9186362548210399E-2	G1
A_TTGGGCGGCGGTTGCC-1	1	KM4242_01	3	Primary	3 --> 3	Oligodendrocyte_like_tumor	NA	Pri_Recurrence_after_TMZ	1p_19q_codeleted	CNA_Group_ 3	3.2324800290403397E-2	-2.1732938708305702E-3	S
A_TTGGTCACACTCGTAA-1	0	KM4242_01	3	Primary	3 --> 3	Proneural_OPC_like_tumor	G3	Pri_Recurrence_after_TMZ	1p_19q_codeleted	CNA_Group_ 1	9.2399432221492606E-2	-5.5060310975702603E-2	S
A_TTGTAAGGACCTAAGT-1	0	KM4242_01	3	Primary	3 --> 3	Proneural_OPC_like_tumor	G3	Pri_Recurrence_after_TMZ	1p_19q_codeleted	CNA_Group_ 1	9.8557761646830798E-3	-2.8024025642863801E-2	S
A_TTGTAAGGCCAGTTGG-1	1	KM4242_01	3	Primary	3 --> 3	Oligodendrocyte_like_tumor	NA	Pri_Recurrence_after_TMZ	1p_19q_codeleted	CNA_Group_ 3	6.8991934614082298E-3	-1.0188582148691601E-2	S
A_TTGTAATCCGTACTCG-1	0	KM4242_01	3	Primary	3 --> 3	Proneural_OPC_like_tumor	G3	Pri_Recurrence_after_TMZ	1p_19q_codeleted	CNA_Group_ 1	7.14017411404229E-2	5.7822549602629399E-2	S
A_TTGTCGTTCAGTTACC-1	2	KM4242_01	3	Primary	3 --> 3	NPC_like_tumor	Neurons	Pri_Recurrence_after_TMZ	non_tumor	NA	3.6060743401295899E-2	-2.3836308737007501E-2	S
A_TTGTGCAGCCACGTCA-1	0	KM4242_01	3	Primary	3 --> 3	Proneural_OPC_like_tumor	G3	Pri_Recurrence_after_TMZ	1p_19q_codeleted	CNA_Group_ 2	2.3699209797859201E-2	-4.1672561341176001E-2	S
A_TTGTGGCCCTGACAGT-1	1	KM4242_01	3	Primary	3 --> 3	Oligodendrocyte_like_tumor	NA	Pri_Recurrence_after_TMZ	1p_19q_codeleted	CNA_Group_ 3	6.76349712533761E-2	2.6317325768994201E-2	S
A_TTGTGTATGCCACCAA-1	0	KM4242_01	3	Primary	3 --> 3	Proneural_OPC_like_tumor	G3	Pri_Recurrence_after_TMZ	1p_19q_codeleted	CNA_Group_ 2	1.7184708422115402E-2	-2.2027360403847899E-2	S
A_TTGTGTTTCCCGAAAG-1	0	KM4242_01	3	Primary	3 --> 3	Proneural_OPC_like_tumor	G3	Pri_Recurrence_after_TMZ	1p_19q_codeleted	CNA_Group_ 2	2.1236753149946198E-2	-1.9468542288745401E-2	S
A_TTGTTAGCAAATTCGA-1	0	KM4242_01	3	Primary	3 --> 3	Proneural_OPC_like_tumor	G3	Pri_Recurrence_after_TMZ	1p_19q_codeleted	CNA_Group_ 1	3.0925241902310101E-2	-2.0689108427340699E-2	S
A_TTGTTCAGTGTGCTAC-1	1	KM4242_01	3	Primary	3 --> 3	Oligodendrocyte_like_tumor	NA	Pri_Recurrence_after_TMZ	1p_19q_codeleted	CNA_Group_ 3	-2.5289355407123602E-2	6.3620197603027201E-3	G2M
A_TTGTTGTGTGTCAAGA-1	1	KM4242_01	3	Primary	3 --> 3	Oligodendrocyte_like_tumor	NA	Pri_Recurrence_after_TMZ	1p_19q_codeleted	CNA_Group_ 3	-1.1439668317798499E-2	-5.6335884024333299E-3	G1
A_TTGTTTCCATACAACT-1	0	KM4242_01	3	Primary	3 --> 3	Proneural_OPC_like_tumor	G3	Pri_Recurrence_after_TMZ	1p_19q_codeleted	CNA_Group_ 1	4.0971168043435598E-2	-2.39945129469048E-2	S
B_AAACAAGTATCTCCCA-1	1	KM4242_02	3	Recurrent	3 --> 3	Oligodendrocyte_like_tumor	G2	Recurrence_after_TMZ	1p_19q_codeleted	CNA_Group_ 2	-1.9295959572222701E-2	6.8778120284324701E-2	G2M
B_AAACACCAATAACTGC-1	0	KM4242_02	3	Recurrent	3 --> 3	Proneural_OPC_like_tumor	G2	Recurrence_after_TMZ	1p_19q_codeleted	CNA_Group_ 3	-3.8899221945219199E-2	-6.4954532249040603E-2	G1
B_AAACAGCTTTCAGAAG-1	0	KM4242_02	3	Recurrent	3 --> 3	Proneural_OPC_like_tumor	G2	Recurrence_after_TMZ	1p_19q_codeleted	CNA_Group_ 3	-5.3513313247703399E-2	-6.7920383105791904E-2	G1
B_AAACAGGGTCTATATT-1	0	KM4242_02	3	Recurrent	3 --> 3	Proneural_OPC_like_tumor	G2	Recurrence_after_TMZ	1p_19q_codeleted	CNA_Group_ 3	7.3650695994990703E-2	-4.0347085424003802E-2	S
B_AAACATTTCCCGGATT-1	1	KM4242_02	3	Recurrent	3 --> 3	Oligodendrocyte_like_tumor	G2	Recurrence_after_TMZ	1p_19q_codeleted	CNA_Group_ 2	-1.3408680345957499E-3	-6.37935467605725E-2	G1
B_AAACCGGGTAGGTACC-1	0	KM4242_02	3	Recurrent	3 --> 3	Proneural_OPC_like_tumor	G2	Recurrence_after_TMZ	1p_19q_codeleted	CNA_Group_ 3	-5.0562062344265198E-2	-4.2947352611198898E-2	G1
B_AAACCGTTCGTCCAGG-1	0	KM4242_02	3	Recurrent	3 --> 3	Proneural_OPC_like_tumor	G2	Recurrence_after_TMZ	1p_19q_codeleted	CNA_Group_ 3	-8.4411027535978393E-3	-3.6265341795269197E-2	G1
B_AAACCTAAGCAGCCGG-1	1	KM4242_02	3	Recurrent	3 --> 3	Oligodendrocyte_like_tumor	NA	Recurrence_after_TMZ	non_tumor	CNA_Group_ 2	-2.77273419742394E-2	3.0668598211711799E-2	G2M
B_AAACCTCATGAAGTTG-1	2	KM4242_02	3	Recurrent	3 --> 3	NPC_like_tumor	Neurons	Recurrence_after_TMZ	non_tumor	NA	-4.8261931966644099E-2	-2.9062239972770399E-2	G1
B_AAACGAGACGGTTGAT-1	2	KM4242_02	3	Recurrent	3 --> 3	NPC_like_tumor	Neurons	Recurrence_after_TMZ	non_tumor	NA	-4.4306120161151201E-2	-9.4002126427901095E-2	G1
B_AAACGGGCGTACGGGT-1	1	KM4242_02	3	Recurrent	3 --> 3	Oligodendrocyte_like_tumor	NA	Recurrence_after_TMZ	non_tumor	CNA_Group_ 2	-1.5755665153070399E-2	-3.1703709170711601E-2	G1
B_AAACGGTTGCGAACTG-1	1	KM4242_02	3	Recurrent	3 --> 3	Oligodendrocyte_like_tumor	G2	Recurrence_after_TMZ	1p_19q_codeleted	CNA_Group_ 2	1.75156091216899E-3	-1.68956355265867E-2	S
B_AAACTCGGTTCGCAAT-1	1	KM4242_02	3	Recurrent	3 --> 3	Oligodendrocyte_like_tumor	G2	Recurrence_after_TMZ	1p_19q_codeleted	CNA_Group_ 2	-5.02552543353319E-2	-4.0189045644745298E-2	G1
B_AAACTGCTGGCTCCAA-1	1	KM4242_02	3	Recurrent	3 --> 3	Oligodendrocyte_like_tumor	G2	Recurrence_after_TMZ	1p_19q_codeleted	CNA_Group_ 3	2.6833614819740899E-2	-4.7904684065002902E-2	S
B_AAACTTGCAAACGTAT-1	0	KM4242_02	3	Recurrent	3 --> 3	Proneural_OPC_like_tumor	G2	Recurrence_after_TMZ	1p_19q_codeleted	CNA_Group_ 3	7.7665743116981803E-3	-4.0354682355834698E-2	S
B_AAAGACTGGGCGCTTT-1	2	KM4242_02	3	Recurrent	3 --> 3	NPC_like_tumor	Neurons	Recurrence_after_TMZ	non_tumor	NA	-1.7178623182546399E-2	-3.5878356470752597E-2	G1
B_AAAGGCCCTATAATAC-1	0	KM4242_02	3	Recurrent	3 --> 3	Proneural_OPC_like_tumor	G2	Recurrence_after_TMZ	1p_19q_codeleted	CNA_Group_ 3	-3.1482525787447799E-2	-5.5025202421361802E-2	G1
B_AAAGGCTACGGACCAT-1	1	KM4242_02	3	Recurrent	3 --> 3	Oligodendrocyte_like_tumor	G2	Recurrence_after_TMZ	1p_19q_codeleted	CNA_Group_ 2	0.103717719922948	-6.7027086434575806E-2	S
B_AAAGGCTCTCGCGCCG-1	0	KM4242_02	3	Recurrent	3 --> 3	Proneural_OPC_like_tumor	G2	Recurrence_after_TMZ	1p_19q_codeleted	CNA_Group_ 3	-3.4361303191472001E-2	-9.2128457137056294E-2	G1
B_AAAGGGATGTAGCAAG-1	2	KM4242_02	3	Recurrent	3 --> 3	NPC_like_tumor	Neurons	Recurrence_after_TMZ	non_tumor	NA	-1.49898125197209E-3	-3.2094102455970499E-3	G1
B_AAAGGGCAGCTTGAAT-1	5	KM4242_02	3	Recurrent	3 --> 3	NPC_like_and_DNA_damage	NA	Recurrence_after_TMZ	non_tumor	CNA_Group_ 2	6.4617164986859599E-2	-5.16237060071408E-2	S
B_AAAGTAGCATTGCTCA-1	0	KM4242_02	3	Recurrent	3 --> 3	Proneural_OPC_like_tumor	G2	Recurrence_after_TMZ	1p_19q_codeleted	CNA_Group_ 3	-1.8356439066854201E-2	-1.99973547817732E-2	G1
B_AAAGTCGACCCTCAGT-1	2	KM4242_02	3	Recurrent	3 --> 3	NPC_like_tumor	Neurons	Recurrence_after_TMZ	non_tumor	NA	-1.63664200848135E-2	-5.7660662870855804E-3	G1
B_AAAGTGTGATTTATCT-1	5	KM4242_02	3	Recurrent	3 --> 3	NPC_like_and_DNA_damage	NA	Recurrence_after_TMZ	non_tumor	CNA_Group_ 3	-2.16808195050977E-2	-0.10264201931290801	G1
B_AAAGTTGACTCCCGTA-1	1	KM4242_02	3	Recurrent	3 --> 3	Oligodendrocyte_like_tumor	G2	Recurrence_after_TMZ	1p_19q_codeleted	CNA_Group_ 2	-6.6742209864325705E-2	-2.0508503285043601E-2	G1
B_AAATACCTATAAGCAT-1	1	KM4242_02	3	Recurrent	3 --> 3	Oligodendrocyte_like_tumor	G2	Recurrence_after_TMZ	1p_19q_codeleted	CNA_Group_ 3	-2.6675562368381402E-2	-3.5260581721791397E-2	G1
B_AAATAGCTTAGACTTT-1	7	KM4242_02	3	Recurrent	3 --> 3	Cortical_neurons_and_tumor_cells	Cortical_neurons_and_tumor_cells	Recurrence_after_TMZ	non_tumor	CNA_Group_ 2	-3.2749991692736298E-2	-5.3789578319373803E-2	G1
B_AAATAGGGTGCTATTG-1	1	KM4242_02	3	Recurrent	3 --> 3	Oligodendrocyte_like_tumor	NA	Recurrence_after_TMZ	non_tumor	CNA_Group_ 2	-2.9727515896983703E-4	-7.33317774539127E-2	G1
B_AAATCCGATACACGCC-1	1	KM4242_02	3	Recurrent	3 --> 3	Oligodendrocyte_like_tumor	NA	Recurrence_after_TMZ	non_tumor	CNA_Group_ 2	2.4215772840578399E-2	-8.3795167471639898E-2	S
B_AAATCGTGTACCACAA-1	0	KM4242_02	3	Recurrent	3 --> 3	Proneural_OPC_like_tumor	G2	Recurrence_after_TMZ	1p_19q_codeleted	CNA_Group_ 2	-1.30906106258329E-2	-1.55902959022363E-2	G1
B_AAATCTAGCCCTGCTA-1	1	KM4242_02	3	Recurrent	3 --> 3	Oligodendrocyte_like_tumor	NA	Recurrence_after_TMZ	non_tumor	CNA_Group_ 2	1.2413454935016E-2	-3.8550122520288797E-2	S
B_AAATGACTGATCAAAC-1	1	KM4242_02	3	Recurrent	3 --> 3	Oligodendrocyte_like_tumor	G2	Recurrence_after_TMZ	1p_19q_codeleted	CNA_Group_ 2	-3.1222350145818801E-2	-6.8862019694069299E-2	G1
B_AAATGATTCGATCAGC-1	2	KM4242_02	3	Recurrent	3 --> 3	NPC_like_tumor	Neurons	Recurrence_after_TMZ	non_tumor	NA	-6.9671509171028004E-2	-6.3789073799025098E-2	G1
B_AAATGCTCGTTACGTT-1	0	KM4242_02	3	Recurrent	3 --> 3	Proneural_OPC_like_tumor	NA	Recurrence_after_TMZ	1p_19q_codeleted	CNA_Group_ 2	-2.2618831012030102E-2	4.37683618981341E-2	G2M
B_AAATGGCATGTCTTGT-1	3	KM4242_02	3	Recurrent	3 --> 3	RBCs	RBCs	Recurrence_after_TMZ	1p_19q_codeleted	CNA_Group_ 2	4.2007705877287797E-2	6.5295498662096803E-3	S
B_AAATGGCCCGTGCCCT-1	0	KM4242_02	3	Recurrent	3 --> 3	Proneural_OPC_like_tumor	G2	Recurrence_after_TMZ	1p_19q_codeleted	CNA_Group_ 3	-1.51462749960157E-2	-3.3598304629511903E-2	G1
B_AAATGGTCAATGTGCC-1	2	KM4242_02	3	Recurrent	3 --> 3	NPC_like_tumor	Neurons	Recurrence_after_TMZ	non_tumor	NA	-7.8580345970270998E-2	-7.2363707285108603E-2	G1
B_AAATTAACGGGTAGCT-1	2	KM4242_02	3	Recurrent	3 --> 3	NPC_like_tumor	Neurons	Recurrence_after_TMZ	non_tumor	NA	-4.2251814222156403E-2	-5.7157078741187098E-2	G1
B_AAATTGATAGTCCTTT-1	0	KM4242_02	3	Recurrent	3 --> 3	Proneural_OPC_like_tumor	G2	Recurrence_after_TMZ	1p_19q_codeleted	CNA_Group_ 3	-4.7384759618499001E-2	-7.6894698790396399E-2	G1
B_AAATTTGCGGGTGTGG-1	0	KM4242_02	3	Recurrent	3 --> 3	Proneural_OPC_like_tumor	G2	Recurrence_after_TMZ	1p_19q_codeleted	CNA_Group_ 3	2.4124190175595101E-2	-8.1109845610300199E-2	S
B_AACAACTGGTAGTTGC-1	2	KM4242_02	3	Recurrent	3 --> 3	NPC_like_tumor	Neurons	Recurrence_after_TMZ	non_tumor	NA	-8.9658374870143207E-2	-8.9073754849208403E-2	G1
B_AACAATACATTGTCGA-1	0	KM4242_02	3	Recurrent	3 --> 3	Proneural_OPC_like_tumor	G2	Recurrence_after_TMZ	1p_19q_codeleted	CNA_Group_ 3	-4.1723180251707001E-2	-6.1554809568160597E-2	G1
B_AACAATTACTCTACGC-1	7	KM4242_02	3	Recurrent	3 --> 3	Cortical_neurons_and_tumor_cells	Cortical_neurons_and_tumor_cells	Recurrence_after_TMZ	non_tumor	CNA_Group_ 2	-6.3607699243030799E-3	-2.9619727072279001E-2	G1
B_AACACACGCTCGCCGC-1	1	KM4242_02	3	Recurrent	3 --> 3	Oligodendrocyte_like_tumor	NA	Recurrence_after_TMZ	non_tumor	CNA_Group_ 2	9.5244019970965E-4	-6.1921369585178597E-2	S
B_AACACGAGACGCGGCC-1	7	KM4242_02	3	Recurrent	3 --> 3	Cortical_neurons_and_tumor_cells	Cortical_neurons_and_tumor_cells	Recurrence_after_TMZ	non_tumor	CNA_Group_ 3	-4.6372581598954901E-3	-3.12009901495637E-2	G1
B_AACAGCTGTGTGGCAA-1	0	KM4242_02	3	Recurrent	3 --> 3	Proneural_OPC_like_tumor	G2	Recurrence_after_TMZ	1p_19q_codeleted	CNA_Group_ 3	-9.0341071387319092E-3	-5.7311549511872902E-2	G1
B_AACAGGAAATCGAATA-1	3	KM4242_02	3	Recurrent	3 --> 3	RBCs	RBCs	Recurrence_after_TMZ	non_tumor	CNA_Group_ 2	-6.2610179689996395E-2	-2.4643773481145999E-2	G1
B_AACAGGATGGGCCGCG-1	2	KM4242_02	3	Recurrent	3 --> 3	NPC_like_tumor	Neurons	Recurrence_after_TMZ	non_tumor	NA	-2.0785220472613601E-2	-2.68445936507903E-2	G1
B_AACATTGAAGTTGATC-1	0	KM4242_02	3	Recurrent	3 --> 3	Proneural_OPC_like_tumor	G2	Recurrence_after_TMZ	1p_19q_codeleted	CNA_Group_ 2	6.8371426325902901E-2	-4.5253186069278799E-2	S
B_AACATTGTGACTCGAG-1	1	KM4242_02	3	Recurrent	3 --> 3	Oligodendrocyte_like_tumor	G2	Recurrence_after_TMZ	1p_19q_codeleted	CNA_Group_ 3	-3.4852263619538297E-2	-2.3304816636094901E-2	G1
B_AACCAAGACTTCTCTG-1	3	KM4242_02	3	Recurrent	3 --> 3	RBCs	RBCs	Recurrence_after_TMZ	1p_19q_codeleted	CNA_Group_ 2	-8.5538847088089107E-2	-1.6581137042533799E-2	G1
B_AACCATGGGATCGCTA-1	0	KM4242_02	3	Recurrent	3 --> 3	Proneural_OPC_like_tumor	NA	Recurrence_after_TMZ	1p_19q_codeleted	CNA_Group_ 2	1.12234791395997E-2	-1.62036187591716E-2	S
B_AACCCAGAGACGGAGA-1	5	KM4242_02	3	Recurrent	3 --> 3	NPC_like_and_DNA_damage	NA	Recurrence_after_TMZ	non_tumor	CNA_Group_ 2	-2.9167924605989499E-2	-5.2216753140321799E-3	G1
B_AACCCATCCCATGATC-1	0	KM4242_02	3	Recurrent	3 --> 3	Proneural_OPC_like_tumor	G2	Recurrence_after_TMZ	1p_19q_codeleted	CNA_Group_ 3	-3.1016909956223401E-2	-4.6230665920402297E-3	G1
B_AACCCGACAACCCGTG-1	0	KM4242_02	3	Recurrent	3 --> 3	Proneural_OPC_like_tumor	G2	Recurrence_after_TMZ	1p_19q_codeleted	CNA_Group_ 3	4.6269451283150603E-3	-6.6833399649060002E-2	S
B_AACCCGCTGTATTCCA-1	1	KM4242_02	3	Recurrent	3 --> 3	Oligodendrocyte_like_tumor	G2	Recurrence_after_TMZ	1p_19q_codeleted	CNA_Group_ 2	-3.2867134136810798E-2	-6.2835980553837406E-2	G1
B_AACCCTACTGTCAATA-1	7	KM4242_02	3	Recurrent	3 --> 3	Cortical_neurons_and_tumor_cells	Cortical_neurons_and_tumor_cells	Recurrence_after_TMZ	non_tumor	CNA_Group_ 2	-4.4672396586227299E-2	-6.7712967400706606E-2	G1
B_AACCCTGGTGGAACCA-1	4	KM4242_02	3	Recurrent	3 --> 3	Pericyte_Endothelial	Pericyte_Endothelial	Recurrence_after_TMZ	1p_19q_codeleted	CNA_Group_ 2	-6.1323599817992597E-2	-4.6404820505382298E-2	G1
B_AACCGAGCTTGGTCAT-1	2	KM4242_02	3	Recurrent	3 --> 3	NPC_like_tumor	Neurons	Recurrence_after_TMZ	non_tumor	NA	-9.4520827368747604E-2	-7.1852619361957804E-2	G1
B_AACCGCTAAGGGATGC-1	1	KM4242_02	3	Recurrent	3 --> 3	Oligodendrocyte_like_tumor	G2	Recurrence_after_TMZ	1p_19q_codeleted	CNA_Group_ 2	-1.60589359381503E-2	-5.23490433549555E-2	G1
B_AACCGTTGTGTTTGCT-1	3	KM4242_02	3	Recurrent	3 --> 3	RBCs	RBCs	Recurrence_after_TMZ	1p_19q_codeleted	CNA_Group_ 2	-5.25997359871321E-2	5.82511231653558E-2	G2M
B_AACCTCGCTTTAGCCC-1	7	KM4242_02	3	Recurrent	3 --> 3	Cortical_neurons_and_tumor_cells	Cortical_neurons_and_tumor_cells	Recurrence_after_TMZ	non_tumor	CNA_Group_ 2	-5.4722644357351899E-2	-5.04236406345039E-2	G1
B_AACCTTTAAATACGGT-1	4	KM4242_02	3	Recurrent	3 --> 3	Pericyte_Endothelial	Pericyte_Endothelial	Recurrence_after_TMZ	1p_19q_codeleted	CNA_Group_ 2	-7.3028308841592504E-2	-2.3863036964058199E-2	G1
B_AACGATAATGCCGTAG-1	1	KM4242_02	3	Recurrent	3 --> 3	Oligodendrocyte_like_tumor	G2	Recurrence_after_TMZ	1p_19q_codeleted	CNA_Group_ 2	-1.5114765926403199E-2	-5.88045998676439E-2	G1
B_AACGATAGAAGGGCCG-1	5	KM4242_02	3	Recurrent	3 --> 3	NPC_like_and_DNA_damage	NA	Recurrence_after_TMZ	non_tumor	CNA_Group_ 2	5.4667103335408196E-4	-6.4999553144828399E-3	S
B_AACGATATGTCAACTG-1	2	KM4242_02	3	Recurrent	3 --> 3	NPC_like_tumor	Neurons	Recurrence_after_TMZ	non_tumor	NA	7.6474684449799003E-3	-4.1018010233230998E-2	S
B_AACGCGACCTTGGGCG-1	1	KM4242_02	3	Recurrent	3 --> 3	Oligodendrocyte_like_tumor	G2	Recurrence_after_TMZ	1p_19q_codeleted	CNA_Group_ 3	4.75831901631611E-2	-1.3225608047508599E-2	S
B_AACGCGGTCTCCAGCC-1	7	KM4242_02	3	Recurrent	3 --> 3	Cortical_neurons_and_tumor_cells	Cortical_neurons_and_tumor_cells	Recurrence_after_TMZ	non_tumor	CNA_Group_ 2	-1.22216373193763E-2	-7.1909665329985703E-2	G1
B_AACGCTGTTGCTGAAA-1	7	KM4242_02	3	Recurrent	3 --> 3	Cortical_neurons_and_tumor_cells	Cortical_neurons_and_tumor_cells	Recurrence_after_TMZ	non_tumor	CNA_Group_ 2	-5.4235657297934399E-2	-4.55931261380874E-2	G1
B_AACGGACGTACGTATA-1	1	KM4242_02	3	Recurrent	3 --> 3	Oligodendrocyte_like_tumor	NA	Recurrence_after_TMZ	non_tumor	CNA_Group_ 2	6.0532003887099201E-3	-1.0202502598621601E-2	S
B_AACGGCCATCTCCGGT-1	0	KM4242_02	3	Recurrent	3 --> 3	Proneural_OPC_like_tumor	G2	Recurrence_after_TMZ	1p_19q_codeleted	CNA_Group_ 3	-3.4535234311454999E-2	-1.9826965603936601E-2	G1
B_AACGTACTGTGGGTAC-1	4	KM4242_02	3	Recurrent	3 --> 3	Pericyte_Endothelial	Pericyte_Endothelial	Recurrence_after_TMZ	1p_19q_codeleted	CNA_Group_ 2	-2.0459322140840199E-2	-7.1205862371767403E-2	G1
B_AACGTCAGACTAGTGG-1	2	KM4242_02	3	Recurrent	3 --> 3	NPC_like_tumor	Neurons	Recurrence_after_TMZ	non_tumor	NA	-5.0604475006485697E-2	4.09027329730247E-2	G2M
B_AACGTCATCCGGCTTG-1	1	KM4242_02	3	Recurrent	3 --> 3	Oligodendrocyte_like_tumor	NA	Recurrence_after_TMZ	non_tumor	CNA_Group_ 3	-5.0508589366460299E-2	-7.2413733885670295E-2	G1
B_AACGTGCGAAAGTCTC-1	2	KM4242_02	3	Recurrent	3 --> 3	NPC_like_tumor	Neurons	Recurrence_after_TMZ	non_tumor	NA	-7.0544708338296694E-2	-7.0370078323142196E-2	G1
B_AACTAGGCTTGGGTGT-1	7	KM4242_02	3	Recurrent	3 --> 3	Cortical_neurons_and_tumor_cells	Cortical_neurons_and_tumor_cells	Recurrence_after_TMZ	non_tumor	CNA_Group_ 3	-3.9706535543638802E-2	-5.2589204550591503E-2	G1
B_AACTCAAGTTAATTGC-1	2	KM4242_02	3	Recurrent	3 --> 3	NPC_like_tumor	Neurons	Recurrence_after_TMZ	non_tumor	NA	-7.6547908170281606E-2	-4.2113664622840099E-3	G1
B_AACTCCAGAGCGTGTT-1	4	KM4242_02	3	Recurrent	3 --> 3	Pericyte_Endothelial	Pericyte_Endothelial	Recurrence_after_TMZ	1p_19q_codeleted	CNA_Group_ 2	-9.2165297712819505E-2	-0.108470242880399	G1
B_AACTCTCAATAGAGCG-1	2	KM4242_02	3	Recurrent	3 --> 3	NPC_like_tumor	Neurons	Recurrence_after_TMZ	non_tumor	NA	-2.7617117442667798E-2	-5.6929779408217397E-2	G1
B_AACTCTCAGTGTGCTC-1	0	KM4242_02	3	Recurrent	3 --> 3	Proneural_OPC_like_tumor	G2	Recurrence_after_TMZ	1p_19q_codeleted	CNA_Group_ 3	4.2134561578466699E-2	-3.09588375586566E-2	S
B_AACTGATATTAGGCCT-1	2	KM4242_02	3	Recurrent	3 --> 3	NPC_like_tumor	Neurons	Recurrence_after_TMZ	non_tumor	NA	1.6138811936009599E-2	8.48575252866274e-05	S
B_AACTGGGTCCCGACGT-1	2	KM4242_02	3	Recurrent	3 --> 3	NPC_like_tumor	Neurons	Recurrence_after_TMZ	non_tumor	NA	-5.0186578826634303E-3	-3.6623319384063303E-2	G1
B_AACTTGCCCGTATGCA-1	2	KM4242_02	3	Recurrent	3 --> 3	NPC_like_tumor	Neurons	Recurrence_after_TMZ	non_tumor	NA	-5.5461368023775298E-2	-2.5342850106591899E-2	G1
B_AAGACCCAACTGAACA-1	0	KM4242_02	3	Recurrent	3 --> 3	Proneural_OPC_like_tumor	G2	Recurrence_after_TMZ	1p_19q_codeleted	CNA_Group_ 3	3.1939270663782597E-2	-2.4561829933273199E-2	S
B_AAGACTGCAAGCTACT-1	7	KM4242_02	3	Recurrent	3 --> 3	Cortical_neurons_and_tumor_cells	Cortical_neurons_and_tumor_cells	Recurrence_after_TMZ	non_tumor	CNA_Group_ 2	-1.21703556334656E-2	-8.4755167575250395E-2	G1
B_AAGAGATGAATCGGTA-1	4	KM4242_02	3	Recurrent	3 --> 3	Pericyte_Endothelial	Pericyte_Endothelial	Recurrence_after_TMZ	1p_19q_codeleted	CNA_Group_ 2	7.87056322422508E-3	-1.5593670073372301E-3	S
B_AAGAGCTCTTTATCGG-1	2	KM4242_02	3	Recurrent	3 --> 3	NPC_like_tumor	Neurons	Recurrence_after_TMZ	non_tumor	NA	-2.23712121851928E-2	-8.8269324228753707E-2	G1
B_AAGAGGATGTACGCGA-1	2	KM4242_02	3	Recurrent	3 --> 3	NPC_like_tumor	Neurons	Recurrence_after_TMZ	non_tumor	NA	-0.11510889033895701	-9.3153870563214197E-2	G1
B_AAGAGGCATGGATCGC-1	2	KM4242_02	3	Recurrent	3 --> 3	NPC_like_tumor	Neurons	Recurrence_after_TMZ	non_tumor	NA	-6.3758779909273505E-2	-0.11484845522034801	G1
B_AAGATGGCACCGGACC-1	0	KM4242_02	3	Recurrent	3 --> 3	Proneural_OPC_like_tumor	G2	Recurrence_after_TMZ	1p_19q_codeleted	CNA_Group_ 3	7.0917739984943301E-2	-4.5370196061779798E-2	S
B_AAGATTGGCGGAACGT-1	3	KM4242_02	3	Recurrent	3 --> 3	RBCs	RBCs	Recurrence_after_TMZ	1p_19q_codeleted	CNA_Group_ 2	-2.5944797750712002E-2	-6.4494330864408894E-2	G1
B_AAGCACCCTGCGTATC-1	1	KM4242_02	3	Recurrent	3 --> 3	Oligodendrocyte_like_tumor	NA	Recurrence_after_TMZ	non_tumor	CNA_Group_ 2	-6.6220416504376906E-2	-5.3240944569841603E-2	G1
B_AAGCATACTCTCCTGA-1	4	KM4242_02	3	Recurrent	3 --> 3	Pericyte_Endothelial	Pericyte_Endothelial	Recurrence_after_TMZ	1p_19q_codeleted	CNA_Group_ 2	-6.06150208220377E-2	-6.5598751604624E-2	G1
B_AAGCCGAAGCGGTTTA-1	1	KM4242_02	3	Recurrent	3 --> 3	Oligodendrocyte_like_tumor	G2	Recurrence_after_TMZ	1p_19q_codeleted	CNA_Group_ 2	9.7549451838942203E-2	-4.4065810254541298E-3	S
B_AAGCCGCCGTGAAATC-1	0	KM4242_02	3	Recurrent	3 --> 3	Proneural_OPC_like_tumor	G2	Recurrence_after_TMZ	1p_19q_codeleted	CNA_Group_ 3	-3.4822711816841302E-2	-3.77898386486775E-2	G1
B_AAGCGCAGGGCTTTGA-1	1	KM4242_02	3	Recurrent	3 --> 3	Oligodendrocyte_like_tumor	NA	Recurrence_after_TMZ	non_tumor	CNA_Group_ 2	7.3650695994990606E-2	2.1686421520208002E-3	S
B_AAGCGTCCCTCATCGA-1	0	KM4242_02	3	Recurrent	3 --> 3	Proneural_OPC_like_tumor	G2	Recurrence_after_TMZ	1p_19q_codeleted	CNA_Group_ 3	-3.16708142661629E-3	-1.8503984952026001E-2	G1
B_AAGCTAGATCGAGTAA-1	1	KM4242_02	3	Recurrent	3 --> 3	Oligodendrocyte_like_tumor	G2	Recurrence_after_TMZ	1p_19q_codeleted	CNA_Group_ 2	-7.8548148451472094E-2	-7.2930014872452903E-2	G1
B_AAGCTCGTGCCAAGTC-1	2	KM4242_02	3	Recurrent	3 --> 3	NPC_like_tumor	Neurons	Recurrence_after_TMZ	non_tumor	NA	-0.118282075472327	-6.8608857236890003E-2	G1
B_AAGCTCTTTCATGGTG-1	1	KM4242_02	3	Recurrent	3 --> 3	Oligodendrocyte_like_tumor	G2	Recurrence_after_TMZ	1p_19q_codeleted	CNA_Group_ 3	9.2551633270489597E-2	5.3910051192222898E-2	S
B_AAGGAGCGGTTGGTGC-1	2	KM4242_02	3	Recurrent	3 --> 3	NPC_like_tumor	Neurons	Recurrence_after_TMZ	non_tumor	NA	-6.3184859691251302E-2	-3.3481044246366803E-2	G1
B_AAGGATCGATCGCTTG-1	5	KM4242_02	3	Recurrent	3 --> 3	NPC_like_and_DNA_damage	NA	Recurrence_after_TMZ	non_tumor	CNA_Group_ 2	-5.07777299887388E-2	-1.13713724641358E-2	G1
B_AAGGATGAGGGACCTC-1	2	KM4242_02	3	Recurrent	3 --> 3	NPC_like_tumor	Neurons	Recurrence_after_TMZ	non_tumor	NA	-2.2242990958349199E-2	-9.2549431090009904E-3	G1
B_AAGGCGCGTAAAGCTT-1	2	KM4242_02	3	Recurrent	3 --> 3	NPC_like_tumor	Neurons	Recurrence_after_TMZ	non_tumor	NA	-2.2736818628267201E-2	-2.25381724853186E-2	G1
B_AAGGCTGTGCTCATCG-1	7	KM4242_02	3	Recurrent	3 --> 3	Cortical_neurons_and_tumor_cells	Cortical_neurons_and_tumor_cells	Recurrence_after_TMZ	non_tumor	CNA_Group_ 2	4.6887776822437999E-2	-6.13547327145346E-2	S
B_AAGGGAACGACTGGCT-1	0	KM4242_02	3	Recurrent	3 --> 3	Proneural_OPC_like_tumor	G2	Recurrence_after_TMZ	1p_19q_codeleted	CNA_Group_ 3	0.11608216157817799	-8.7376278797319407E-2	S
B_AAGGGACAGATTCTGT-1	2	KM4242_02	3	Recurrent	3 --> 3	NPC_like_tumor	Neurons	Recurrence_after_TMZ	non_tumor	NA	-4.9971762510050699E-2	-5.8699426748077002E-2	G1
B_AAGGGACTATGCATTC-1	0	KM4242_02	3	Recurrent	3 --> 3	Proneural_OPC_like_tumor	G2	Recurrence_after_TMZ	1p_19q_codeleted	CNA_Group_ 3	2.2674391237842199E-2	-5.2989622626472603E-2	S
B_AAGGTATCCTAATATA-1	7	KM4242_02	3	Recurrent	3 --> 3	Cortical_neurons_and_tumor_cells	Cortical_neurons_and_tumor_cells	Recurrence_after_TMZ	non_tumor	CNA_Group_ 2	-4.8715823843783E-2	-4.74147070917302E-2	G1
B_AAGGTGATAAACCAGC-1	1	KM4242_02	3	Recurrent	3 --> 3	Oligodendrocyte_like_tumor	G2	Recurrence_after_TMZ	1p_19q_codeleted	CNA_Group_ 2	4.0654498127934997E-3	-8.7132997450500606E-3	S
B_AAGTAGAAGACCGGGT-1	2	KM4242_02	3	Recurrent	3 --> 3	NPC_like_tumor	Neurons	Recurrence_after_TMZ	non_tumor	NA	-3.6328358489152897E-2	5.1302505136249801E-2	G2M
B_AAGTAGTGACGCGAGG-1	2	KM4242_02	3	Recurrent	3 --> 3	NPC_like_tumor	Neurons	Recurrence_after_TMZ	non_tumor	NA	-1.5366748682072001E-2	-3.2876348230338401E-2	G1
B_AAGTCAATTGTCGTCA-1	1	KM4242_02	3	Recurrent	3 --> 3	Oligodendrocyte_like_tumor	G2	Recurrence_after_TMZ	1p_19q_codeleted	CNA_Group_ 2	-7.3099519866777707E-2	-4.4914100146937801E-2	G1
B_AAGTGACGACCGAATT-1	2	KM4242_02	3	Recurrent	3 --> 3	NPC_like_tumor	Neurons	Recurrence_after_TMZ	non_tumor	NA	-3.7360467591400298E-2	-0.108256114667485	G1
B_AAGTGAGTCGGGTTTA-1	1	KM4242_02	3	Recurrent	3 --> 3	Oligodendrocyte_like_tumor	G2	Recurrence_after_TMZ	1p_19q_codeleted	CNA_Group_ 3	-1.25606243799238E-2	-3.8278638112038098E-2	G1
B_AAGTGCAAAGGTAGAC-1	2	KM4242_02	3	Recurrent	3 --> 3	NPC_like_tumor	Neurons	Recurrence_after_TMZ	non_tumor	NA	-7.2720824694929298E-2	-2.9281848956755001E-2	G1
B_AAGTGCCTTGACTGTA-1	1	KM4242_02	3	Recurrent	3 --> 3	Oligodendrocyte_like_tumor	G2	Recurrence_after_TMZ	1p_19q_codeleted	CNA_Group_ 2	-1.6682779410895202E-2	0.30909793409555397	G2M
B_AAGTGCGTTAGAATCT-1	0	KM4242_02	3	Recurrent	3 --> 3	Proneural_OPC_like_tumor	G2	Recurrence_after_TMZ	1p_19q_codeleted	CNA_Group_ 3	-1.1200684489672701E-2	-7.3284546937674999E-2	G1
B_AAGTGCTTCTCTATTG-1	0	KM4242_02	3	Recurrent	3 --> 3	Proneural_OPC_like_tumor	G2	Recurrence_after_TMZ	1p_19q_codeleted	CNA_Group_ 3	2.22540429992336E-2	-4.4638786217907997E-2	S
B_AAGTGTTTGGAGACGG-1	1	KM4242_02	3	Recurrent	3 --> 3	Oligodendrocyte_like_tumor	G2	Recurrence_after_TMZ	1p_19q_codeleted	CNA_Group_ 2	4.9302159133949898E-3	4.8368246465555299E-2	G2M
B_AAGTTCACTCCAAGCT-1	1	KM4242_02	3	Recurrent	3 --> 3	Oligodendrocyte_like_tumor	NA	Recurrence_after_TMZ	non_tumor	CNA_Group_ 2	-1.88871076062214E-2	-5.1161685312647497E-2	G1
B_AAGTTCGGCCAACAGG-1	0	KM4242_02	3	Recurrent	3 --> 3	Proneural_OPC_like_tumor	G2	Recurrence_after_TMZ	1p_19q_codeleted	CNA_Group_ 3	-5.6953592122977403E-2	-4.1690420754753398E-2	G1
B_AAGTTTATGGGCCCAA-1	1	KM4242_02	3	Recurrent	3 --> 3	Oligodendrocyte_like_tumor	G2	Recurrence_after_TMZ	1p_19q_codeleted	CNA_Group_ 2	2.5995468289438699E-2	-4.2286207971556897E-2	S
B_AATAACAACGCTCGGC-1	3	KM4242_02	3	Recurrent	3 --> 3	RBCs	RBCs	Recurrence_after_TMZ	1p_19q_codeleted	CNA_Group_ 2	-0.14444605346845299	-3.1407189633159902E-2	G1
B_AATAACACTAGAACAA-1	0	KM4242_02	3	Recurrent	3 --> 3	Proneural_OPC_like_tumor	G2	Recurrence_after_TMZ	1p_19q_codeleted	CNA_Group_ 3	-1.3084847576075301E-4	-4.3385898728654799E-3	G1
B_AATACAATGTTTCAGG-1	2	KM4242_02	3	Recurrent	3 --> 3	NPC_like_tumor	Neurons	Recurrence_after_TMZ	non_tumor	NA	-3.7640653361272901E-3	-2.2989943701593601E-2	G1
B_AATACCGGAGGGCTGT-1	5	KM4242_02	3	Recurrent	3 --> 3	NPC_like_and_DNA_damage	NA	Recurrence_after_TMZ	non_tumor	CNA_Group_ 2	-8.2555428606357006E-2	-5.5821645215200701E-2	G1
B_AATAGAACAGAGTGGC-1	4	KM4242_02	3	Recurrent	3 --> 3	Pericyte_Endothelial	Pericyte_Endothelial	Recurrence_after_TMZ	1p_19q_codeleted	CNA_Group_ 3	-8.4808047091705901E-3	-4.8720109102689597E-2	G1
B_AATAGAATCTGTTTCA-1	1	KM4242_02	3	Recurrent	3 --> 3	Oligodendrocyte_like_tumor	G2	Recurrence_after_TMZ	1p_19q_codeleted	CNA_Group_ 2	-1.8428332385497601E-2	-5.2483573491990104E-3	G1
B_AATAGCTACCGCGTGC-1	2	KM4242_02	3	Recurrent	3 --> 3	NPC_like_tumor	Neurons	Recurrence_after_TMZ	non_tumor	NA	-4.9264804455572901E-2	-5.15482467568074E-2	G1
B_AATAGTCCGTCCCGAC-1	1	KM4242_02	3	Recurrent	3 --> 3	Oligodendrocyte_like_tumor	G2	Recurrence_after_TMZ	1p_19q_codeleted	CNA_Group_ 3	-2.0905691114020401E-2	-3.3944278804766401E-2	G1
B_AATATCCTAGCAAACT-1	0	KM4242_02	3	Recurrent	3 --> 3	Proneural_OPC_like_tumor	G2	Recurrence_after_TMZ	1p_19q_codeleted	CNA_Group_ 3	4.3358321193120199E-2	2.5916546373659598E-2	S
B_AATATTGGAGTATTGA-1	3	KM4242_02	3	Recurrent	3 --> 3	RBCs	RBCs	Recurrence_after_TMZ	1p_19q_codeleted	CNA_Group_ 2	-9.3667659653441093E-2	-2.3810865591989101E-2	G1
B_AATCAGGTTTCATTTA-1	0	KM4242_02	3	Recurrent	3 --> 3	Proneural_OPC_like_tumor	G2	Recurrence_after_TMZ	1p_19q_codeleted	CNA_Group_ 2	-4.07583151494968E-2	-2.5907772830248399E-3	G1
B_AATCATGTAAAGACTC-1	7	KM4242_02	3	Recurrent	3 --> 3	Cortical_neurons_and_tumor_cells	Cortical_neurons_and_tumor_cells	Recurrence_after_TMZ	non_tumor	CNA_Group_ 2	-4.5961801589023001E-2	-3.8823610480454102E-2	G1
B_AATCCAAGGGCCTGAG-1	0	KM4242_02	3	Recurrent	3 --> 3	Proneural_OPC_like_tumor	NA	Recurrence_after_TMZ	1p_19q_codeleted	CNA_Group_ 2	3.7291667264887397E-2	-3.6316242832608397E-2	S
B_AATCCCGCTCAGAGCC-1	1	KM4242_02	3	Recurrent	3 --> 3	Oligodendrocyte_like_tumor	G2	Recurrence_after_TMZ	1p_19q_codeleted	CNA_Group_ 2	-5.7924339982809697E-3	-8.2154503345748794E-2	G1
B_AATCGCCTCAGCGCCA-1	7	KM4242_02	3	Recurrent	3 --> 3	Cortical_neurons_and_tumor_cells	Cortical_neurons_and_tumor_cells	Recurrence_after_TMZ	non_tumor	CNA_Group_ 2	-4.5408499159461699E-2	-2.5282685245719399E-2	G1
B_AATCGTGAGCCGAGCA-1	1	KM4242_02	3	Recurrent	3 --> 3	Oligodendrocyte_like_tumor	NA	Recurrence_after_TMZ	non_tumor	CNA_Group_ 2	-3.3943588357508901E-2	-2.5990697389639699E-2	G1
B_AATCTAGGTTTACTTG-1	0	KM4242_02	3	Recurrent	3 --> 3	Proneural_OPC_like_tumor	G2	Recurrence_after_TMZ	1p_19q_codeleted	CNA_Group_ 3	-5.7585616170226103E-2	-4.0876906774096299E-2	G1
B_AATCTCTACTGTGGTT-1	5	KM4242_02	3	Recurrent	3 --> 3	NPC_like_and_DNA_damage	NA	Recurrence_after_TMZ	non_tumor	CNA_Group_ 2	-1.5454345479177799E-2	-3.0293585680060402E-2	G1
B_AATCTGCGTTGGGACG-1	2	KM4242_02	3	Recurrent	3 --> 3	NPC_like_tumor	Neurons	Recurrence_after_TMZ	non_tumor	NA	-8.4231021744454904E-2	-7.9747600206858393E-2	G1
B_AATCTGGCTTTCTAGT-1	0	KM4242_02	3	Recurrent	3 --> 3	Proneural_OPC_like_tumor	G2	Recurrence_after_TMZ	1p_19q_codeleted	CNA_Group_ 3	-3.5159747766201503E-2	-4.3575738040283203E-2	G1
B_AATGACAGCAATGTCT-1	0	KM4242_02	3	Recurrent	3 --> 3	Proneural_OPC_like_tumor	G2	Recurrence_after_TMZ	1p_19q_codeleted	CNA_Group_ 3	6.7738408845987405E-2	-7.6423486537837204E-2	S
B_AATGACGTAGGATGTC-1	1	KM4242_02	3	Recurrent	3 --> 3	Oligodendrocyte_like_tumor	G2	Recurrence_after_TMZ	1p_19q_codeleted	CNA_Group_ 2	3.7587773801029303E-2	-3.8597304384128603E-2	S
B_AATGACTGTCAGCCGG-1	2	KM4242_02	3	Recurrent	3 --> 3	NPC_like_tumor	Neurons	Recurrence_after_TMZ	non_tumor	NA	-1.63343183352017E-2	-2.8076645728067E-2	G1
B_AATGCAACCGGGTACC-1	2	KM4242_02	3	Recurrent	3 --> 3	NPC_like_tumor	Neurons	Recurrence_after_TMZ	non_tumor	NA	-4.0011177071363299E-2	-6.80358705176931E-3	G1
B_AATGGTCCACCGTTCA-1	2	KM4242_02	3	Recurrent	3 --> 3	NPC_like_tumor	Neurons	Recurrence_after_TMZ	non_tumor	NA	-4.5176451898795801E-2	-3.9951356160515497E-2	G1
B_AATGGTTCTCACAAGC-1	4	KM4242_02	3	Recurrent	3 --> 3	Pericyte_Endothelial	Pericyte_Endothelial	Recurrence_after_TMZ	non_tumor	CNA_Group_ 2	-1.6151362313357499E-3	-2.4911281463933399E-2	G1
B_AATGTGCCCGAGGTGT-1	0	KM4242_02	3	Recurrent	3 --> 3	Proneural_OPC_like_tumor	G2	Recurrence_after_TMZ	1p_19q_codeleted	CNA_Group_ 3	1.35328248844751E-2	1.10350828265748E-2	S
B_AATGTGCTAATCTGAG-1	0	KM4242_02	3	Recurrent	3 --> 3	Proneural_OPC_like_tumor	G2	Recurrence_after_TMZ	1p_19q_codeleted	CNA_Group_ 3	3.06115098251457E-2	-5.4098536493397499E-2	S
B_AATTAAAGGTCGGCGT-1	2	KM4242_02	3	Recurrent	3 --> 3	NPC_like_tumor	Neurons	Recurrence_after_TMZ	non_tumor	NA	-9.6661373417088903E-3	3.9730118237229502E-2	G2M
B_AATTAACGGATTTCCA-1	1	KM4242_02	3	Recurrent	3 --> 3	Oligodendrocyte_like_tumor	G2	Recurrence_after_TMZ	1p_19q_codeleted	CNA_Group_ 3	-8.0220294884467292E-3	-6.6885370291274407E-2	G1
B_AATTAGCGCTGCAGCG-1	1	KM4242_02	3	Recurrent	3 --> 3	Oligodendrocyte_like_tumor	G2	Recurrence_after_TMZ	1p_19q_codeleted	CNA_Group_ 3	-5.3355187718870503E-2	-5.7084037982305401E-2	G1
B_AATTCATAAGGGATCT-1	2	KM4242_02	3	Recurrent	3 --> 3	NPC_like_tumor	Neurons	Recurrence_after_TMZ	non_tumor	NA	-4.7876396184295102E-2	-1.35205856177599E-2	G1
B_AATTCCAAGCATGTAC-1	1	KM4242_02	3	Recurrent	3 --> 3	Oligodendrocyte_like_tumor	G2	Recurrence_after_TMZ	1p_19q_codeleted	CNA_Group_ 3	1.8881677918226002E-2	-3.4949932857530801E-3	S
B_AATTCGATTCGAGGAT-1	1	KM4242_02	3	Recurrent	3 --> 3	Oligodendrocyte_like_tumor	G2	Recurrence_after_TMZ	1p_19q_codeleted	CNA_Group_ 2	-2.3955006450149401E-2	-6.2639302884891196E-2	G1
B_AATTCTAGAGTTAGGC-1	1	KM4242_02	3	Recurrent	3 --> 3	Oligodendrocyte_like_tumor	G2	Recurrence_after_TMZ	1p_19q_codeleted	CNA_Group_ 3	-5.89777535792761E-2	-5.7439192995152599E-2	G1
B_AATTGAACGCTCTGGT-1	1	KM4242_02	3	Recurrent	3 --> 3	Oligodendrocyte_like_tumor	G2	Recurrence_after_TMZ	1p_19q_codeleted	CNA_Group_ 2	-1.54967644848988E-2	-1.8075056128988801E-2	G1
B_AATTTGGTTCCAAAGA-1	3	KM4242_02	3	Recurrent	3 --> 3	RBCs	RBCs	Recurrence_after_TMZ	1p_19q_codeleted	CNA_Group_ 2	3.8231851596529198E-2	-1.6938288424659801E-3	S
B_ACAAAGAAGGTAGGCC-1	7	KM4242_02	3	Recurrent	3 --> 3	Cortical_neurons_and_tumor_cells	Cortical_neurons_and_tumor_cells	Recurrence_after_TMZ	1p_19q_codeleted	CNA_Group_ 2	1.77613083803718E-2	-4.5468338195406799E-2	S
B_ACAAAGCATGACCTAG-1	1	KM4242_02	3	Recurrent	3 --> 3	Oligodendrocyte_like_tumor	NA	Recurrence_after_TMZ	non_tumor	CNA_Group_ 2	-4.2911140133162502E-2	-4.7905579786796701E-2	G1
B_ACAAATCGCACCGAAT-1	1	KM4242_02	3	Recurrent	3 --> 3	Oligodendrocyte_like_tumor	NA	Recurrence_after_TMZ	non_tumor	CNA_Group_ 2	3.87812931637996E-2	-1.42386021805599E-2	S
B_ACAAATGGTAGTGTTT-1	1	KM4242_02	3	Recurrent	3 --> 3	Oligodendrocyte_like_tumor	G2	Recurrence_after_TMZ	1p_19q_codeleted	CNA_Group_ 2	2.1559593492759401E-2	-6.0922447590000496E-4	S
B_ACAACAGCATGAGCTA-1	2	KM4242_02	3	Recurrent	3 --> 3	NPC_like_tumor	Neurons	Recurrence_after_TMZ	non_tumor	NA	-0.110287389958698	-4.0738175792208002E-2	G1
B_ACAACGGTCCCTGCGA-1	2	KM4242_02	3	Recurrent	3 --> 3	NPC_like_tumor	Neurons	Recurrence_after_TMZ	non_tumor	NA	-6.1713336838240603E-2	-6.34261535674185E-2	G1
B_ACAAGCAGTGCCTAGC-1	2	KM4242_02	3	Recurrent	3 --> 3	NPC_like_tumor	Neurons	Recurrence_after_TMZ	non_tumor	NA	-3.2415875664317299E-2	-6.5033321210219699E-3	G1
B_ACAAGGAAATCCGCCC-1	7	KM4242_02	3	Recurrent	3 --> 3	Cortical_neurons_and_tumor_cells	Cortical_neurons_and_tumor_cells	Recurrence_after_TMZ	non_tumor	CNA_Group_ 2	1.36733019793866E-2	4.3033421140163702E-4	S
B_ACAAGGACAAGAGGTT-1	2	KM4242_02	3	Recurrent	3 --> 3	NPC_like_tumor	Neurons	Recurrence_after_TMZ	non_tumor	NA	-2.8850332605282501E-2	-1.4921525947344499E-2	G1
B_ACAAGGATGCTTTAGG-1	4	KM4242_02	3	Recurrent	3 --> 3	Pericyte_Endothelial	Pericyte_Endothelial	Recurrence_after_TMZ	non_tumor	CNA_Group_ 2	-4.68246288898937E-2	-5.5734566424498699E-2	G1
B_ACAAGGGCAGGCTCTG-1	1	KM4242_02	3	Recurrent	3 --> 3	Oligodendrocyte_like_tumor	NA	Recurrence_after_TMZ	non_tumor	CNA_Group_ 2	-1.24660971710863E-2	-2.7838592838187501E-2	G1
B_ACAATAGTCGTACGTT-1	5	KM4242_02	3	Recurrent	3 --> 3	NPC_like_and_DNA_damage	NA	Recurrence_after_TMZ	non_tumor	CNA_Group_ 3	-6.5483637793412694E-2	-6.8132731911694305E-2	G1
B_ACAATCCATTTAAACC-1	2	KM4242_02	3	Recurrent	3 --> 3	NPC_like_tumor	Neurons	Recurrence_after_TMZ	non_tumor	NA	-0.106285035587132	-7.0041734474730305E-2	G1
B_ACAATGAATACGGAGA-1	1	KM4242_02	3	Recurrent	3 --> 3	Oligodendrocyte_like_tumor	G2	Recurrence_after_TMZ	1p_19q_codeleted	CNA_Group_ 3	-2.2827126319793101E-2	-5.7543781758508702E-2	G1
B_ACAATTGTGTCTCTTT-1	4	KM4242_02	3	Recurrent	3 --> 3	Pericyte_Endothelial	Pericyte_Endothelial	Recurrence_after_TMZ	non_tumor	CNA_Group_ 2	-1.83646319528145E-2	-4.2278543933164402E-2	G1
B_ACAATTTAGGAGGCTC-1	4	KM4242_02	3	Recurrent	3 --> 3	Pericyte_Endothelial	Pericyte_Endothelial	Recurrence_after_TMZ	1p_19q_codeleted	CNA_Group_ 2	-7.6576113853246905E-2	-4.3186871007413002E-2	G1
B_ACAATTTGAGCAGTGG-1	2	KM4242_02	3	Recurrent	3 --> 3	NPC_like_tumor	Neurons	Recurrence_after_TMZ	non_tumor	NA	-5.5846311126125002E-2	5.2700840121820101E-3	G2M
B_ACACAAAGACGGGTGG-1	2	KM4242_02	3	Recurrent	3 --> 3	NPC_like_tumor	Neurons	Recurrence_after_TMZ	non_tumor	NA	-3.2411662302733998E-2	-2.7120768364959798E-2	G1
B_ACACACCAGGACCAGT-1	1	KM4242_02	3	Recurrent	3 --> 3	Oligodendrocyte_like_tumor	G2	Recurrence_after_TMZ	1p_19q_codeleted	CNA_Group_ 2	-1.0293278045372599E-2	-9.4930556629438598E-2	G1
B_ACACACTTTCTACACG-1	5	KM4242_02	3	Recurrent	3 --> 3	NPC_like_and_DNA_damage	NA	Recurrence_after_TMZ	non_tumor	CNA_Group_ 2	-1.5667834330986001E-2	-1.7560334451811599E-2	G1
B_ACACATGATCAAATCT-1	0	KM4242_02	3	Recurrent	3 --> 3	Proneural_OPC_like_tumor	G2	Recurrence_after_TMZ	1p_19q_codeleted	CNA_Group_ 3	0.10299808042363701	-6.1189161179946397E-2	S
B_ACACATTTCCGTAGAC-1	1	KM4242_02	3	Recurrent	3 --> 3	Oligodendrocyte_like_tumor	NA	Recurrence_after_TMZ	non_tumor	CNA_Group_ 2	3.52869672856784E-2	-3.4855830464266399E-3	S
B_ACACCCAGCATGCAGC-1	2	KM4242_02	3	Recurrent	3 --> 3	NPC_like_tumor	Neurons	Recurrence_after_TMZ	non_tumor	NA	-2.2068389856364602E-2	-1.4045329848840601E-2	G1
B_ACACCCGAGAAATCCG-1	3	KM4242_02	3	Recurrent	3 --> 3	RBCs	RBCs	Recurrence_after_TMZ	1p_19q_codeleted	CNA_Group_ 2	-6.7070335523740799E-3	1.2119938234869201E-2	G2M
B_ACACCTTAAGTAGGGC-1	2	KM4242_02	3	Recurrent	3 --> 3	NPC_like_tumor	Neurons	Recurrence_after_TMZ	non_tumor	NA	-5.8431961742216897E-2	-2.89989288070426E-2	G1
B_ACACCTTACTACTTGC-1	5	KM4242_02	3	Recurrent	3 --> 3	NPC_like_and_DNA_damage	NA	Recurrence_after_TMZ	non_tumor	CNA_Group_ 2	-4.4499817741704098E-2	2.6498836031796399E-3	G2M
B_ACACGAGACTCCTTCT-1	2	KM4242_02	3	Recurrent	3 --> 3	NPC_like_tumor	Neurons	Recurrence_after_TMZ	non_tumor	NA	2.36091497299042E-3	-6.2840793558871302E-2	S
B_ACACGGCACTATGCAT-1	4	KM4242_02	3	Recurrent	3 --> 3	Pericyte_Endothelial	Pericyte_Endothelial	Recurrence_after_TMZ	non_tumor	CNA_Group_ 2	1.9523451211368399E-2	-3.3884898030076001E-2	S
B_ACACGGGAACTTAGGG-1	2	KM4242_02	3	Recurrent	3 --> 3	NPC_like_tumor	Neurons	Recurrence_after_TMZ	non_tumor	NA	-8.4463069005120794E-2	-7.8793097679358007E-2	G1
B_ACACTGATCAAGGTGT-1	0	KM4242_02	3	Recurrent	3 --> 3	Proneural_OPC_like_tumor	G2	Recurrence_after_TMZ	1p_19q_codeleted	CNA_Group_ 3	-3.6662109706823001E-2	-3.3520639780890003E-2	G1
B_ACAGAACTGAGAACAA-1	0	KM4242_02	3	Recurrent	3 --> 3	Proneural_OPC_like_tumor	G2	Recurrence_after_TMZ	1p_19q_codeleted	CNA_Group_ 3	6.6153779976896197E-3	-5.21004776173071E-2	S
B_ACAGCATAGAGCCAGT-1	3	KM4242_02	3	Recurrent	3 --> 3	RBCs	RBCs	Recurrence_after_TMZ	1p_19q_codeleted	CNA_Group_ 2	-2.7042514931187402E-2	-1.3081640016411799E-2	G1
B_ACAGCGACATTCTCAT-1	1	KM4242_02	3	Recurrent	3 --> 3	Oligodendrocyte_like_tumor	NA	Recurrence_after_TMZ	non_tumor	CNA_Group_ 2	-2.87244107509768E-2	9.84111641039573E-3	G2M
B_ACAGCGCACCCGCAGC-1	2	KM4242_02	3	Recurrent	3 --> 3	NPC_like_tumor	Neurons	Recurrence_after_TMZ	non_tumor	NA	-2.3811668081342201E-2	3.95561948255417E-2	G2M
B_ACAGGCTTGCCCGACT-1	7	KM4242_02	3	Recurrent	3 --> 3	Cortical_neurons_and_tumor_cells	Cortical_neurons_and_tumor_cells	Recurrence_after_TMZ	non_tumor	CNA_Group_ 2	2.3569653891184301E-3	-2.3606598736831901E-2	S
B_ACAGGTGGAGGTGAGG-1	0	KM4242_02	3	Recurrent	3 --> 3	Proneural_OPC_like_tumor	G2	Recurrence_after_TMZ	1p_19q_codeleted	CNA_Group_ 3	-3.1356579310228998E-2	-2.6150494043592602E-2	G1
B_ACAGTAATACAACTTG-1	0	KM4242_02	3	Recurrent	3 --> 3	Proneural_OPC_like_tumor	G2	Recurrence_after_TMZ	1p_19q_codeleted	CNA_Group_ 3	3.3094446502168098E-2	-1.12169053370621E-2	S
B_ACATAATAAGGCGGTG-1	2	KM4242_02	3	Recurrent	3 --> 3	NPC_like_tumor	Neurons	Recurrence_after_TMZ	non_tumor	NA	-2.6297543334262801E-2	-7.2532266553586494E-2	G1
B_ACATCAGCTGGGACGC-1	2	KM4242_02	3	Recurrent	3 --> 3	NPC_like_tumor	Neurons	Recurrence_after_TMZ	non_tumor	NA	-1.40602817696258E-2	-4.4062572333337102E-2	G1
B_ACATCCCGGCCATACG-1	0	KM4242_02	3	Recurrent	3 --> 3	Proneural_OPC_like_tumor	G2	Recurrence_after_TMZ	1p_19q_codeleted	CNA_Group_ 3	-3.8686265007393403E-2	-1.6109674878958601E-2	G1
B_ACATCCTGGTAACTGT-1	1	KM4242_02	3	Recurrent	3 --> 3	Oligodendrocyte_like_tumor	NA	Recurrence_after_TMZ	non_tumor	CNA_Group_ 2	7.6447800893972795E-2	-5.8888678468744397E-2	S
B_ACATCGATCGTTTACC-1	1	KM4242_02	3	Recurrent	3 --> 3	Oligodendrocyte_like_tumor	G2	Recurrence_after_TMZ	1p_19q_codeleted	CNA_Group_ 2	-1.5746119991650299E-2	-5.4275910822864398E-2	G1
B_ACATCGGTCAGCCGCG-1	2	KM4242_02	3	Recurrent	3 --> 3	NPC_like_tumor	Neurons	Recurrence_after_TMZ	non_tumor	NA	-5.4794537675995299E-2	-3.9560934570405798E-2	G1
B_ACATCGTATGCAATGG-1	1	KM4242_02	3	Recurrent	3 --> 3	Oligodendrocyte_like_tumor	G2	Recurrence_after_TMZ	1p_19q_codeleted	CNA_Group_ 2	-7.2229087759874003E-3	-5.3083690294060397E-2	G1
B_ACATGGCGCCAAAGTA-1	2	KM4242_02	3	Recurrent	3 --> 3	NPC_like_tumor	Neurons	Recurrence_after_TMZ	non_tumor	NA	-2.6366732101986701E-2	-3.7251883835056503E-2	G1
B_ACATTAGTTTATATCC-1	1	KM4242_02	3	Recurrent	3 --> 3	Oligodendrocyte_like_tumor	G2	Recurrence_after_TMZ	1p_19q_codeleted	CNA_Group_ 3	-6.6935986678081398E-3	-6.9531468815415207E-2	G1
B_ACCAACCGCACTCCAC-1	1	KM4242_02	3	Recurrent	3 --> 3	Oligodendrocyte_like_tumor	G2	Recurrence_after_TMZ	1p_19q_codeleted	CNA_Group_ 2	-5.07455447813965E-2	-3.5313352974500902E-3	G1
B_ACCAACGCTTATTTAT-1	1	KM4242_02	3	Recurrent	3 --> 3	Oligodendrocyte_like_tumor	G2	Recurrence_after_TMZ	1p_19q_codeleted	CNA_Group_ 3	2.2682584123802502E-2	-5.50878345483388E-2	S
B_ACCAAGAACGCGTGTC-1	5	KM4242_02	3	Recurrent	3 --> 3	NPC_like_and_DNA_damage	NA	Recurrence_after_TMZ	non_tumor	CNA_Group_ 2	7.1422948819302402E-3	-2.4562436364365801E-2	S
B_ACCAATATGCAAGTTA-1	1	KM4242_02	3	Recurrent	3 --> 3	Oligodendrocyte_like_tumor	NA	Recurrence_after_TMZ	non_tumor	CNA_Group_ 2	1.6633434405743601E-2	-5.78061677707183E-2	S
B_ACCACAAGTTTCTATC-1	2	KM4242_02	3	Recurrent	3 --> 3	NPC_like_tumor	Neurons	Recurrence_after_TMZ	non_tumor	NA	4.44363553707562E-2	-4.0128918646626002E-2	S
B_ACCACACGGTTGATGG-1	1	KM4242_02	3	Recurrent	3 --> 3	Oligodendrocyte_like_tumor	NA	Recurrence_after_TMZ	non_tumor	CNA_Group_ 2	-2.1021493594091702E-2	-2.2775215020108298E-2	G1
B_ACCACCAATGTAACAA-1	3	KM4242_02	3	Recurrent	3 --> 3	RBCs	RBCs	Recurrence_after_TMZ	non_tumor	CNA_Group_ 2	-7.5954993398606299E-2	-7.9331131714574198E-3	G1
B_ACCACGTGCAGCTATA-1	1	KM4242_02	3	Recurrent	3 --> 3	Oligodendrocyte_like_tumor	G2	Recurrence_after_TMZ	1p_19q_codeleted	CNA_Group_ 3	-1.45929725664544E-2	-3.0071077489234498E-2	G1
B_ACCAGACCATAACAAC-1	4	KM4242_02	3	Recurrent	3 --> 3	Pericyte_Endothelial	Pericyte_Endothelial	Recurrence_after_TMZ	1p_19q_codeleted	CNA_Group_ 2	-5.1939064144166797E-2	-0.10176032822487301	G1
B_ACCAGTGCGGGAGACG-1	1	KM4242_02	3	Recurrent	3 --> 3	Oligodendrocyte_like_tumor	G2	Recurrence_after_TMZ	1p_19q_codeleted	CNA_Group_ 2	-3.15160995542553E-2	-4.8123056379937801E-2	G1
B_ACCATATCCGCAATAA-1	2	KM4242_02	3	Recurrent	3 --> 3	NPC_like_tumor	Neurons	Recurrence_after_TMZ	non_tumor	NA	-5.1061891796021601E-2	-7.9482597499903294E-3	G1
B_ACCATCCGCCAACTAG-1	5	KM4242_02	3	Recurrent	3 --> 3	NPC_like_and_DNA_damage	NA	Recurrence_after_TMZ	non_tumor	CNA_Group_ 3	-7.0450174973731003E-2	-1.8858641895507101E-2	G1
B_ACCATCGTATATGGTA-1	7	KM4242_02	3	Recurrent	3 --> 3	Cortical_neurons_and_tumor_cells	Cortical_neurons_and_tumor_cells	Recurrence_after_TMZ	non_tumor	CNA_Group_ 2	-3.1456594854107199E-2	-4.9181794244390599E-2	G1
B_ACCCAACGCCCGTGGC-1	2	KM4242_02	3	Recurrent	3 --> 3	NPC_like_tumor	Neurons	Recurrence_after_TMZ	non_tumor	NA	-2.0003263782492401E-2	1.8401429009965001E-2	G2M
B_ACCCACCTACATGCTC-1	2	KM4242_02	3	Recurrent	3 --> 3	NPC_like_tumor	Neurons	Recurrence_after_TMZ	non_tumor	NA	-1.8563913825367501E-2	-4.4268214953131102E-2	G1
B_ACCCATCTTGAGGGTA-1	2	KM4242_02	3	Recurrent	3 --> 3	NPC_like_tumor	Neurons	Recurrence_after_TMZ	non_tumor	NA	-0.115299883368591	-6.1026575750280698E-2	G1
B_ACCCATTTGTCCCTCT-1	1	KM4242_02	3	Recurrent	3 --> 3	Oligodendrocyte_like_tumor	G2	Recurrence_after_TMZ	1p_19q_codeleted	CNA_Group_ 2	1.6232093032244599E-2	-0.109331507125112	S
B_ACCCGAGCGAAATTAC-1	0	KM4242_02	3	Recurrent	3 --> 3	Proneural_OPC_like_tumor	G2	Recurrence_after_TMZ	1p_19q_codeleted	CNA_Group_ 3	-4.8222230011071301E-2	-1.1494343084403299E-2	G1
B_ACCCGATTGGTTCCGA-1	0	KM4242_02	3	Recurrent	3 --> 3	Proneural_OPC_like_tumor	G2	Recurrence_after_TMZ	1p_19q_codeleted	CNA_Group_ 3	-4.6478035467656997E-2	-8.0511918926209694E-2	G1
B_ACCCGGAAACTCCCAG-1	1	KM4242_02	3	Recurrent	3 --> 3	Oligodendrocyte_like_tumor	G2	Recurrence_after_TMZ	1p_19q_codeleted	CNA_Group_ 3	-6.89972115086172E-3	-2.91014343648032E-2	G1
B_ACCCGGATGACGCATC-1	2	KM4242_02	3	Recurrent	3 --> 3	NPC_like_tumor	Neurons	Recurrence_after_TMZ	non_tumor	NA	-7.5186047109348106E-2	-6.4750603398008602E-2	G1
B_ACCCGGTTACACTTCC-1	7	KM4242_02	3	Recurrent	3 --> 3	Cortical_neurons_and_tumor_cells	Cortical_neurons_and_tumor_cells	Recurrence_after_TMZ	non_tumor	CNA_Group_ 2	-7.67416724848086E-3	-7.65843794790355E-2	G1
B_ACCCGTGTCATCAGTA-1	0	KM4242_02	3	Recurrent	3 --> 3	Proneural_OPC_like_tumor	G2	Recurrence_after_TMZ	1p_19q_codeleted	CNA_Group_ 3	-2.46117051122383E-2	-3.3521212622226702E-2	G1
B_ACCCTATGCCATATCG-1	0	KM4242_02	3	Recurrent	3 --> 3	Proneural_OPC_like_tumor	G2	Recurrence_after_TMZ	1p_19q_codeleted	CNA_Group_ 3	-4.6687672295079299E-3	-7.9810529648181194E-2	G1
B_ACCCTCCCTTGCTATT-1	1	KM4242_02	3	Recurrent	3 --> 3	Oligodendrocyte_like_tumor	G2	Recurrence_after_TMZ	1p_19q_codeleted	CNA_Group_ 2	-2.3289243282859101E-4	-3.6989222964374201E-2	G1
B_ACCCTTCATCTGCGAA-1	3	KM4242_02	3	Recurrent	3 --> 3	RBCs	RBCs	Recurrence_after_TMZ	1p_19q_codeleted	CNA_Group_ 2	1.21006453320165E-2	-3.3836828609747002E-2	S
B_ACCGAAGAGTCTGGTT-1	0	KM4242_02	3	Recurrent	3 --> 3	Proneural_OPC_like_tumor	G2	Recurrence_after_TMZ	1p_19q_codeleted	CNA_Group_ 3	-3.0852446695658099E-2	-5.0176071689693402E-2	G1
B_ACCGACACATCTCCCA-1	1	KM4242_02	3	Recurrent	3 --> 3	Oligodendrocyte_like_tumor	G2	Recurrence_after_TMZ	1p_19q_codeleted	CNA_Group_ 2	-3.10792519577184E-2	-2.81470328516184E-2	G1
B_ACCGACTGAGTCCCAC-1	2	KM4242_02	3	Recurrent	3 --> 3	NPC_like_tumor	Neurons	Recurrence_after_TMZ	non_tumor	NA	3.8573762185525901E-3	-7.0140560699131202E-2	S
B_ACCGAGTCTCCTTATT-1	1	KM4242_02	3	Recurrent	3 --> 3	Oligodendrocyte_like_tumor	NA	Recurrence_after_TMZ	non_tumor	CNA_Group_ 2	1.7826271475055701E-2	-3.4105835049129098E-2	S
B_ACCGATGGTAGCATCG-1	2	KM4242_02	3	Recurrent	3 --> 3	NPC_like_tumor	Neurons	Recurrence_after_TMZ	non_tumor	NA	-8.2099358774689005E-2	-6.2410226415836503E-2	G1
B_ACCGCAATAACTGCCT-1	1	KM4242_02	3	Recurrent	3 --> 3	Oligodendrocyte_like_tumor	NA	Recurrence_after_TMZ	non_tumor	CNA_Group_ 2	1.04972680713495E-2	-4.18714664566859E-2	S
B_ACCGCGGTGGAAGTCG-1	1	KM4242_02	3	Recurrent	3 --> 3	Oligodendrocyte_like_tumor	NA	Recurrence_after_TMZ	non_tumor	CNA_Group_ 2	-3.9881155112808202E-2	-8.6812175606387609E-3	G1
B_ACCGGGCCTTTGTTGA-1	1	KM4242_02	3	Recurrent	3 --> 3	Oligodendrocyte_like_tumor	NA	Recurrence_after_TMZ	non_tumor	CNA_Group_ 2	7.38584457093182E-3	-6.9034784548906394E-2	S
B_ACCGGTCAGGTACACC-1	0	KM4242_02	3	Recurrent	3 --> 3	Proneural_OPC_like_tumor	G2	Recurrence_after_TMZ	1p_19q_codeleted	CNA_Group_ 2	-3.98886657053103E-2	-1.46192112698054E-2	G1
B_ACCGTGACCACGTGGG-1	1	KM4242_02	3	Recurrent	3 --> 3	Oligodendrocyte_like_tumor	G2	Recurrence_after_TMZ	1p_19q_codeleted	CNA_Group_ 2	-8.58284866623844E-3	-4.0175490115764899E-2	G1
B_ACCTAAGTACCTTTCA-1	0	KM4242_02	3	Recurrent	3 --> 3	Proneural_OPC_like_tumor	G2	Recurrence_after_TMZ	1p_19q_codeleted	CNA_Group_ 3	2.3281154145979699E-2	-6.3236444876623998E-2	S
B_ACCTAATCGACTTCCT-1	2	KM4242_02	3	Recurrent	3 --> 3	NPC_like_tumor	Neurons	Recurrence_after_TMZ	non_tumor	NA	-9.1456665011866806E-2	-0.11036865912360901	G1
B_ACCTACTATAAATCTA-1	1	KM4242_02	3	Recurrent	3 --> 3	Oligodendrocyte_like_tumor	G2	Recurrence_after_TMZ	1p_19q_codeleted	CNA_Group_ 2	-6.2613819214309599E-2	-1.63943569475971E-2	G1
B_ACCTCCGTTATTCACC-1	2	KM4242_02	3	Recurrent	3 --> 3	NPC_like_tumor	Neurons	Recurrence_after_TMZ	non_tumor	NA	-5.2832065868238597E-2	-5.2116286265931303E-2	G1
B_ACCTGCGTGTCATGTT-1	0	KM4242_02	3	Recurrent	3 --> 3	Proneural_OPC_like_tumor	G2	Recurrence_after_TMZ	1p_19q_codeleted	CNA_Group_ 3	-7.4909365954062501E-2	-2.04902373404671E-2	G1
B_ACGAAATGGGCGGCAC-1	3	KM4242_02	3	Recurrent	3 --> 3	RBCs	RBCs	Recurrence_after_TMZ	non_tumor	CNA_Group_ 2	-3.6229244149425699E-3	-0.10669543678976	G1
B_ACGACTGGTCATACTC-1	4	KM4242_02	3	Recurrent	3 --> 3	Pericyte_Endothelial	Pericyte_Endothelial	Recurrence_after_TMZ	1p_19q_codeleted	CNA_Group_ 2	-2.05141773346098E-2	-6.4087034176224704E-3	G1
B_ACGAGGATACCACTCT-1	0	KM4242_02	3	Recurrent	3 --> 3	Proneural_OPC_like_tumor	G2	Recurrence_after_TMZ	1p_19q_codeleted	CNA_Group_ 3	2.9457625683974001E-3	-3.1518214922186601E-2	S
B_ACGAGGTTTACAACGT-1	0	KM4242_02	3	Recurrent	3 --> 3	Proneural_OPC_like_tumor	G2	Recurrence_after_TMZ	1p_19q_codeleted	CNA_Group_ 3	-2.35022882250488E-3	-3.8692161352491997E-2	G1
B_ACGATACATAGAACTA-1	2	KM4242_02	3	Recurrent	3 --> 3	NPC_like_tumor	Neurons	Recurrence_after_TMZ	non_tumor	NA	-6.3112972528336198E-2	-7.3167208967679295E-2	G1
B_ACGATCATACATAGAG-1	2	KM4242_02	3	Recurrent	3 --> 3	NPC_like_tumor	Neurons	Recurrence_after_TMZ	non_tumor	NA	-9.4962552991277593E-2	-6.7355588071129305E-2	G1
B_ACGATCATCTTGTAAA-1	2	KM4242_02	3	Recurrent	3 --> 3	NPC_like_tumor	Neurons	Recurrence_after_TMZ	non_tumor	NA	-3.1253865371159498E-2	-4.6417347798247299E-2	G1
B_ACGATGCATATGTTAT-1	2	KM4242_02	3	Recurrent	3 --> 3	NPC_like_tumor	Neurons	Recurrence_after_TMZ	non_tumor	NA	-4.3971106469252397E-2	-5.7782357235350697E-2	G1
B_ACGCAAACTAATAGAT-1	1	KM4242_02	3	Recurrent	3 --> 3	Oligodendrocyte_like_tumor	G2	Recurrence_after_TMZ	1p_19q_codeleted	CNA_Group_ 3	6.29834868960631E-3	-4.6686495874214202E-2	S
B_ACGCATACGTTTACTA-1	1	KM4242_02	3	Recurrent	3 --> 3	Oligodendrocyte_like_tumor	NA	Recurrence_after_TMZ	non_tumor	CNA_Group_ 2	-1.7677801307258201E-2	1.11947994788551E-2	G2M
B_ACGCATTCGTGAGTAC-1	4	KM4242_02	3	Recurrent	3 --> 3	Pericyte_Endothelial	Pericyte_Endothelial	Recurrence_after_TMZ	non_tumor	CNA_Group_ 2	-3.4867303271727303E-2	-1.6285413444305799E-2	G1
B_ACGCCACTCGAAACAG-1	1	KM4242_02	3	Recurrent	3 --> 3	Oligodendrocyte_like_tumor	NA	Recurrence_after_TMZ	non_tumor	CNA_Group_ 2	-3.1918074625750602E-2	-3.6813914729676302E-2	G1
B_ACGCCAGATGATTTCT-1	2	KM4242_02	3	Recurrent	3 --> 3	NPC_like_tumor	Neurons	Recurrence_after_TMZ	non_tumor	NA	-1.5738303389759099E-2	-4.8672172005592901E-2	G1
B_ACGCCGCTAGACGACC-1	4	KM4242_02	3	Recurrent	3 --> 3	Pericyte_Endothelial	Pericyte_Endothelial	Recurrence_after_TMZ	1p_19q_codeleted	CNA_Group_ 2	-5.5173902829845398E-2	-6.12559479925373E-2	G1
B_ACGCGAAGTCAGACGA-1	1	KM4242_02	3	Recurrent	3 --> 3	Oligodendrocyte_like_tumor	G2	Recurrence_after_TMZ	1p_19q_codeleted	CNA_Group_ 3	-1.02542522275297E-2	-2.6170176052619201E-2	G1
B_ACGCGCTACACAGGGT-1	5	KM4242_02	3	Recurrent	3 --> 3	NPC_like_and_DNA_damage	NA	Recurrence_after_TMZ	non_tumor	CNA_Group_ 3	0.120001497512743	-2.4038132758564999E-2	S
B_ACGCGGGCCAAGGACA-1	2	KM4242_02	3	Recurrent	3 --> 3	NPC_like_tumor	Neurons	Recurrence_after_TMZ	non_tumor	NA	-2.39851632443022E-2	1.9014600700036501E-2	G2M
B_ACGCTGTGAGGCGTAG-1	2	KM4242_02	3	Recurrent	3 --> 3	NPC_like_tumor	Neurons	Recurrence_after_TMZ	non_tumor	NA	-4.4260163931576703E-2	-6.5676494095449595E-2	G1
B_ACGGAATTTAGCAAAT-1	0	KM4242_02	3	Recurrent	3 --> 3	Proneural_OPC_like_tumor	NA	Recurrence_after_TMZ	1p_19q_codeleted	CNA_Group_ 2	2.80231188100462E-3	-2.7536211559564501E-4	S
B_ACGGACTCTCAAAGCG-1	1	KM4242_02	3	Recurrent	3 --> 3	Oligodendrocyte_like_tumor	NA	Recurrence_after_TMZ	non_tumor	CNA_Group_ 2	8.7018752997550398E-3	-5.3204978363224298E-2	S
B_ACGGATGGTGCGGATA-1	1	KM4242_02	3	Recurrent	3 --> 3	Oligodendrocyte_like_tumor	NA	Recurrence_after_TMZ	non_tumor	CNA_Group_ 2	-5.5766907214979497E-2	-8.0841465573733395E-2	G1
B_ACGGCACTTGCTTGGG-1	1	KM4242_02	3	Recurrent	3 --> 3	Oligodendrocyte_like_tumor	G2	Recurrence_after_TMZ	1p_19q_codeleted	CNA_Group_ 3	-8.2738881102983303E-2	-3.7589190321467701E-2	G1
B_ACGGCCAACATGGACT-1	0	KM4242_02	3	Recurrent	3 --> 3	Proneural_OPC_like_tumor	G2	Recurrence_after_TMZ	1p_19q_codeleted	CNA_Group_ 3	-2.52040333596425E-2	-6.9010438441790195E-2	G1
B_ACGGCGACGATGGGAA-1	1	KM4242_02	3	Recurrent	3 --> 3	Oligodendrocyte_like_tumor	G2	Recurrence_after_TMZ	1p_19q_codeleted	CNA_Group_ 2	-6.3697784027509904E-2	-6.6406631962938001E-2	G1
B_ACGGGAGTGTCGGCCC-1	0	KM4242_02	3	Recurrent	3 --> 3	Proneural_OPC_like_tumor	G2	Recurrence_after_TMZ	1p_19q_codeleted	CNA_Group_ 3	6.4218133379568498E-2	-0.10754581136557299	S
B_ACGTACAGATTTCTCT-1	4	KM4242_02	3	Recurrent	3 --> 3	Pericyte_Endothelial	Pericyte_Endothelial	Recurrence_after_TMZ	non_tumor	CNA_Group_ 2	3.26992618491372E-3	-2.2291785034362199E-2	S
B_ACGTACTTTGGCACGG-1	0	KM4242_02	3	Recurrent	3 --> 3	Proneural_OPC_like_tumor	G2	Recurrence_after_TMZ	1p_19q_codeleted	CNA_Group_ 2	-5.7560415850835501E-3	-2.6229294913032299E-2	G1
B_ACGTAGATTGCTGATG-1	2	KM4242_02	3	Recurrent	3 --> 3	NPC_like_tumor	Neurons	Recurrence_after_TMZ	non_tumor	NA	-2.9489203418760001E-2	-7.5709410546611899E-2	G1
B_ACGTAGGAGAGTCGCT-1	1	KM4242_02	3	Recurrent	3 --> 3	Oligodendrocyte_like_tumor	NA	Recurrence_after_TMZ	non_tumor	CNA_Group_ 2	-3.63539494224299E-2	-3.7141490065165497E-2	G1
B_ACGTATTACTCCGATC-1	2	KM4242_02	3	Recurrent	3 --> 3	NPC_like_tumor	Neurons	Recurrence_after_TMZ	non_tumor	NA	-5.5370503936255602E-2	-7.0121184971063996E-2	G1
B_ACGTCTCGTTCCGGGA-1	7	KM4242_02	3	Recurrent	3 --> 3	Cortical_neurons_and_tumor_cells	Cortical_neurons_and_tumor_cells	Recurrence_after_TMZ	non_tumor	CNA_Group_ 2	-1.6965666244720502E-2	-5.04718305520351E-2	G1
B_ACGTGCGCCTCGTGCA-1	2	KM4242_02	3	Recurrent	3 --> 3	NPC_like_tumor	Neurons	Recurrence_after_TMZ	non_tumor	NA	4.0063566586688602E-2	-1.56433407455321E-2	S
B_ACGTTAATGTCGAAGA-1	7	KM4242_02	3	Recurrent	3 --> 3	Cortical_neurons_and_tumor_cells	Cortical_neurons_and_tumor_cells	Recurrence_after_TMZ	non_tumor	CNA_Group_ 2	-3.1570212385784703E-2	1.27691554628188E-2	G2M
B_ACGTTAGATTTGCCCG-1	2	KM4242_02	3	Recurrent	3 --> 3	NPC_like_tumor	Neurons	Recurrence_after_TMZ	non_tumor	NA	-8.8155330636063595E-2	-3.47983797262328E-2	G1
B_ACGTTCGCAATCAATT-1	2	KM4242_02	3	Recurrent	3 --> 3	NPC_like_tumor	Neurons	Recurrence_after_TMZ	non_tumor	NA	-6.7156405941620201E-2	-3.0297994354878399E-2	G1
B_ACGTTCGTTCAGGAAA-1	0	KM4242_02	3	Recurrent	3 --> 3	Proneural_OPC_like_tumor	G2	Recurrence_after_TMZ	1p_19q_codeleted	CNA_Group_ 3	-5.51102023971623E-2	-7.8907922205057601E-2	G1
B_ACGTTCTGTACAAGTC-1	1	KM4242_02	3	Recurrent	3 --> 3	Oligodendrocyte_like_tumor	NA	Recurrence_after_TMZ	non_tumor	CNA_Group_ 2	2.6800154638941101E-2	-5.1088533223299697E-2	S
B_ACGTTTAGTTGTGATC-1	2	KM4242_02	3	Recurrent	3 --> 3	NPC_like_tumor	Neurons	Recurrence_after_TMZ	non_tumor	NA	1.8285715993759E-3	-7.94807534807912E-3	S
B_ACTACAAAGAGAGGTG-1	1	KM4242_02	3	Recurrent	3 --> 3	Oligodendrocyte_like_tumor	G2	Recurrence_after_TMZ	1p_19q_codeleted	CNA_Group_ 3	-1.7450384898013802E-2	-2.0457755303450401E-2	G1
B_ACTACATCCCGACAAG-1	0	KM4242_02	3	Recurrent	3 --> 3	Proneural_OPC_like_tumor	G2	Recurrence_after_TMZ	1p_19q_codeleted	CNA_Group_ 3	1.28935952282048E-2	-7.3300719995257696E-2	S
B_ACTACCAGCTCTCTGG-1	2	KM4242_02	3	Recurrent	3 --> 3	NPC_like_tumor	Neurons	Recurrence_after_TMZ	non_tumor	NA	-4.6969002051451499E-2	-7.70918990174531E-2	G1
B_ACTACGCGTTAGAATT-1	0	KM4242_02	3	Recurrent	3 --> 3	Proneural_OPC_like_tumor	G2	Recurrence_after_TMZ	1p_19q_codeleted	CNA_Group_ 3	-4.7495672599257001E-2	-9.5362818774738702E-3	G1
B_ACTAGTTGCGATCGTC-1	7	KM4242_02	3	Recurrent	3 --> 3	Cortical_neurons_and_tumor_cells	Cortical_neurons_and_tumor_cells	Recurrence_after_TMZ	non_tumor	CNA_Group_ 2	-5.8707930663539402E-2	-3.8622186436747703E-2	G1
B_ACTATCCAGGGCATGG-1	2	KM4242_02	3	Recurrent	3 --> 3	NPC_like_tumor	Neurons	Recurrence_after_TMZ	non_tumor	NA	1.5344017091491399E-2	-7.5148041687632797E-2	S
B_ACTATGTCCAGCTGCC-1	0	KM4242_02	3	Recurrent	3 --> 3	Proneural_OPC_like_tumor	G2	Recurrence_after_TMZ	1p_19q_codeleted	CNA_Group_ 2	2.903531576615E-2	-7.5639173750149096E-3	S
B_ACTATTCGTCCGTGGT-1	3	KM4242_02	3	Recurrent	3 --> 3	RBCs	RBCs	Recurrence_after_TMZ	1p_19q_codeleted	CNA_Group_ 2	-5.2933743747135199E-2	-1.0877042081475E-2	G1
B_ACTATTTCCGGGCCCA-1	0	KM4242_02	3	Recurrent	3 --> 3	Proneural_OPC_like_tumor	G2	Recurrence_after_TMZ	1p_19q_codeleted	CNA_Group_ 3	-4.4245806572845797E-2	0.1033536519721	G2M
B_ACTCAAGTGCAAGGCT-1	1	KM4242_02	3	Recurrent	3 --> 3	Oligodendrocyte_like_tumor	G2	Recurrence_after_TMZ	1p_19q_codeleted	CNA_Group_ 2	-3.3515646068667602E-2	-3.8343860856691503E-2	G1
B_ACTCAATAAAGGCACG-1	2	KM4242_02	3	Recurrent	3 --> 3	NPC_like_tumor	Neurons	Recurrence_after_TMZ	non_tumor	NA	-3.7469435616699201E-2	-3.5824827053810501E-2	G1
B_ACTCCAATATCATCAT-1	0	KM4242_02	3	Recurrent	3 --> 3	Proneural_OPC_like_tumor	G2	Recurrence_after_TMZ	1p_19q_codeleted	CNA_Group_ 3	-1.8108592370766501E-2	-4.6496652455677502E-2	G1
[truncated: 51,408 more rows]

## Sheet: Supplementary_Table_5
Supplementary Table 5. Synaptic connectivity genes enriched in recurrent oligodendrogliomas.
Gene	NCBI_standard_ID	PMID	Published_evidence
ASIC1	NM_001348407.2	33791169, 29056828, 12843249, 24952644	Modulator of synaptic activity with major role in the hippocampus and amygdala by affecting both glutamatergic and GABAergic transmission. In glioblastoma cell lines ASIC1 has been shown to effect cell migration and proliferation.
ATP1A2	NM_000702.4	31766058, 32070274	Controls neurotransmitter and ionic reuptake from synapses, regulating normal synaptic functioning. ATP1A2 was also markedly upregulated at the periphery of infiltration in diffuse gliomas.
BCAN	NM_198427.2	26223835, 23637166	ECM regulating synaptogenesis and dynamics of synapptic transmission.
CAMK2A	NM_015981.4	35287547, 34193145	Kinase with diverse associations reported in literature, including a role in synaptic plasticity and cellular proliferation. Within gliomas, overexpression of CAMK2A has been correlated with increased proliferation, metastasis and downstream regulation of the Ras/Raf/MEK/ERK pathway.
CNTN2	NM_001346083.2	26718491	CNTN2 is a neuronal protein. Aberrant expression in conjunction with RACK1 has been shown to activate the Ras/Raf/MEK/ERK pathway and promote glioma tumor cell proliferation and inhibit differentiation.
EDNRB	NM_001122659.3	12812796, 18693272	Encodes a GPCR which is integral for development of neural crest cells and therefore regulates development of neuronal and glial cells throughout the neuraxis.
GJA1	NM_032602.2	30577786, 24148096, 26536111	Encodes for a connexin family protein connexin 43. Connexin 43 forms intercellular gap junctions and mice with gja1 deficiency show reduced synaptic plasticity. Shown to modulate tumor cell proliferation and invasion and markedly differentially expressed in astrocytoma compared to oligodendrogliomas.
GRIA4	NM_001077244.2	37914930	Encodes a subunit of the excitatory glutamate receptor with a role in fast synaptic transmission. Has also been shown to have a role in neuronal-glial paracrine interactions and synaptic activity in diffuse gliomas.
KCNIP2	NR_045118.1	38577605, 30618619	KCNIP2 is a calcium dependent transcription repressor, shown to be involved in PANoptosis in diffuse glioma.
KCNIP3	NM_013434.5	30618619, 33896885	Encodes for a voltage gated potassium channel which is expressed in glioblastoma and shown to be significantly linked to prognosis.
KCTD12	NM_138444.4	37626178, 31197948	Modulator of potassium activity and shown to be overexpressed in low-grade gliomas.
NCDN	NM_001014841.2	33711248, 38230206	Cytoplasmic protein with role in glutamate receptor signaling, neuron projection regulation, and synaptic plasticity. Has also been shown to have a potential role in cell cycle and cell migration in glioblastoma.
NDRG2	NM_001354566.1	32688030, 31250377	Regulates astrocytic glutamate transport, the primary excitatory neurotransmitter, also contributing to sodium-dependent excitatory amino acid transporter (EAAT) uptake on astrocytes in order to maintain synaptic homeostasis.
NKAIN4	NM_001363747.1	31857451	Expressed in neurons and synapses and interacts with sodium postasssium ATPase. NKAIN4 expression is enriched in glioblastoma.
NPTXR	NM_014293.4	33013829	Pentameric proteins involved in immune regulation, and have been shown to associate with glioma progression and risk of metastasis in multiple cancers.
NRGN	NM_006176.3	16320026, 32543324	Postsynaptic protein concentrated on dendritic spines, has also been shown to be a tumor suppressor with reduced levels in glioblastoma and lower-grade diffuse gliomas.
NRXN1	NM_001330094.2	39657829, 39243986	Expressed in neurons and microglial cells. Experimental evidence in glioblastoma models shows capcity to alter tumor cell fate and is regarded as a positive prognostic factor.
NTRK2	NM_001369540.1	32665022	Receptor for BDNF, regulates long term potentiation of CNS synapses. NTRK dysregulation/upregulation is seen in a variety of CNS low- and high-grade neoplasms.
SCAMP5	NM_138967.4	PMC11709206	Membrane transporter protein involved in vesicle recycling, SCAMP5 expression is downregulated in glioblastoma and correlated with outcome.
SCG3	NM_001165257.2	34257545, 19038000, 30626092, 16530701	Regulates neurotransmitter storage and transport, and has been previously shown to be highly expressed in oligodendrogliomas compared to other adult type diffuse gliomas. In GBMs, there may be correlation of SCG3 expression level with proneural and mesenchymal cell states.
SEMA5A	NM_003966.3	20696765	Shown to inhibit glioma tumor cell migration, with donregulation in high-grade gliomas.
SEZ6L	NM_001243333.2	36348001, 33936031	Encodes for a protein involved in regulating synapse maturation. It is overexpressed in cell-state specific subtypes in glioblastoma and IDH-mutant diffuse gliomas.
SLC12A4	NM_001145963.2	38223443, 36917367	Chloride cotransporter with low tissue specificity and decreased expression in glioblastoma. Other SLC12A family members have been shown to be associated with prognosis in glioblastoma.
SLC1A4	NM_001348407.2	30185558, 33777811	Ion transporter involved in the serine shuttle primarily in astrocytes, but also in neurons. It's expression has been shown in multiple cancers including GBM and HCC, with a potential immunoregulatory role.
SNAP25	NM_001322902.2	34490096	Regulator of synaptic transmission by regulating synaptic vesicle exocytosis and also has a tumor suppressor role. In glioblastomas has been shown to exhibit low levels and inversely correlated with proliferation and cell migration.
SNCA	NM_001308109.2	35326570, 35421944	Encodes α synuclein which maintains presynaptic vesicles and is implicated in a misfolding associated neurodegenerative diseases. It is also overexpressed in glioblastoma cells.
THBS1	NM_003246.4	26452999, 30850588, 33240428, 27485117	ECM regulated by transforming growth factor ß that has a direct role in ECM connectivity at the edges of glioma, is associated with higher grade diffuse gliomas, may have a role in invasion, and angiogenesis during glioblastoma progression. Secreted by immature and developing astrocytes and act as permissive gates allowing structural synapse formation.
VSNL1	NM_001366803.2	26683098	Is part of a family of genes encoding neuronal calcium sensors. miR-671-5p / CDR1-AS / CDR1 / Visinin-like 1 (VSNL1) axis is dysregulated in glioblastoma leading to significantly increased cell proliferation and cell migration.

## Sheet: Supplementary_Table_6
Supplementary Table 6. Differentially expressed genes in newly diagnosed CNS WHO grade 2 oligodendrogliomas that eventually recurred as grade 2 versus grade 3.
gene	avg_log2FC	p_val_adj
GFAP	1.90748	3.26264126655946e-294
HBA2	1.88169	1.11087437731413e-186
HBA1	1.13235	1.4179638629829e-257
FOS	1.05156	8.9443352146041e-133
EGR1	0.777272	9.79381270802269e-113
FOSB	0.717151	2.50570741712871e-231
MBP	0.708607	2.03571769919459e-92
HIST1H4D	0.646968	1.13964227854473e-207
MOBP	0.605522	4.60741937296614e-116
FAM107A	0.597189	4.74167159971368e-116
FAM181B	0.576048	4.37634952947934e-238
TCF12	0.55908	4.33364212822339e-246
LUZP2	0.558547	3.26264126655946e-292
ID4	0.551651	4.48750221867078e-168
GRIA4	0.547285	2.83413785196025e-184
TXNIP	0.541496	1.31446229734241e-271
S100B	0.532918	3.26264126655946e-297
PAQR6	0.524484	3.74474094146305e-158
NKD1	0.523614	6.48598749630931e-187
MTURN	0.514018	1.1234058403988e-129
SOX4	0.510032	3.26334507548295e-201
SELL	0.508385	4.80731969858921e-148
ST6GAL2	0.497478	1.06129441897931e-115
BCAS1	0.494907	2.22048963075545e-206
P2RY12	0.494138	1.87590912529301e-221
F5	0.490115	3.34158030815528e-143
AIF1L	0.476655	6.03586835788398e-243
ID3	0.474398	4.74385653066417e-229
FGF1	0.469245	5.669997839395e-146
SMOC1	0.46509	1.68968031400468e-134
DUSP1	0.460456	7.68390064894472e-163
HLA-C	0.457988	4.26220064241359e-170
ARRDC4	0.456755	3.64692012669492e-201
PLEKHB1	0.454569	1.23270961846137e-120
FXYD6	0.451808	6.06878487646651e-164
DPYSL3	0.446216	2.00037635373046e-213
PCDHB2	0.444911	9.98284150823195e-252
JUNB	0.444892	2.0808487185648e-51
LRATD2	0.442859	3.26135573443526e-191
UST	0.442471	8.12683255112452e-191
PMP2	0.442334	2.3486388851826e-160
LRIG1	0.434112	4.01860901667332e-194
BTG2	0.433566	2.08269196746454e-76
SORBS1	0.429941	1.02936625471234e-169
VIPR2	0.428886	6.41078350269591e-293
MTSS2	0.421746	1.54874216568224e-231
HSPA1B	0.412775	2.59394781359782e-60
ID1	0.409948	4.83515821612096e-90
IL17D	0.406558	2.33836281615017e-153
HIPK2	0.403568	3.08949560602188e-150
EGFR	0.401021	1.41817390233949e-88
JUN	0.399166	2.47523604248847e-58
ZBTB20	0.398015	3.39584122732594e-163
ARL17A	0.396142	1.0084317949555e-232
SLC38A1	0.395886	1.20595135669017e-121
DBI	0.395448	5.96621096291824e-245
TNR	0.393316	6.63802509748457e-131
HIST1H4A	0.386534	4.96381238911219e-131
KLRC4	0.386117	3.78988933762951e-203
AEBP1	0.38419	1.36079748804581e-130
H3F3B	0.377101	2.82189887457475e-160
NRCAM	0.376576	6.38940840035431e-81
HIST1H1B	0.369588	2.33623230537656e-194
[truncated: 417 more rows]

## Sheet: Supplementary_Table_7
Supplementary Table 7. Distribution of spatial transcriptomes across astrocytoma samples.
[truncated: 9 more rows]

[truncated: 4 more sheets: Supplementary_Table_8, Supplementary_Table_9, Supplementary_Table_10, Supplementary_Table_11]
